# Supplementary material for: Genome sequencing of Aspergillus glaucus ‘CCHA’ provides insights into salt-stress adaptation
Source: PeerJ. 2020 Feb 24;8:e8609. doi: 10.7717/peerj.8609 (PMC7045888; doi:10.7717/peerj.8609)
Supplement: Supplemental Information 1 [file peerj-08-8609-s001.xls]

## Sheet: differential gene expression
seq_id	Sample36H_1M_fpkm	Sample36H_3M_fpkm	log2FC(Sample36H_3M/Sample36H_1M)	p-value	FDR	significant	regulate	Sample84H_1M_fpkm	Sample84H_0M_fpkm	log2FC(Sample84H_0M/Sample84H_1M)	p-value	FDR	significant	regulate	Sample84H_1M_fpkm	Sample84H_3M_fpkm	log2FC(Sample84H_3M/Sample84H_1M)	p-value	FDR	significant	regulate	Sample84H_1M_fpkm	Sample84H_4M_fpkm	log2FC(Sample84H_4M/Sample84H_1M)	p-value	FDR	significant	regulate	NR_Description	Swissprot_Description	String_description	KEGG_GENE
g2577	1.47	563.56	8.49	2.08e-20	2.73e-17	yes	up	1.43	0.64	0	1	1	no	no change	1.43	12.55	3.05	0.000214	0.00496	yes	up	1.43	1714.92	10.13	1.03e-24	2.03e-21	yes	up	hypothetical protein EURHEDRAFT_410715 [Aspergillus ruber CBS 135680]	_	_	_
g2578	1.86	409.7	7.71	5.4e-19	3.29e-16	yes	up	0.87	1.02	0.21	0.936	0.996	no	up	0.87	27.47	4.83	1.31e-09	1.79e-07	yes	up	0.87	1108.51	10.16	1.31e-25	1.03e-21	yes	up	hypothetical protein M437DRAFT_62409 [Aureobasidium melanogenum CBS 110374]	_	_	_
g2576	2.17	190.49	6.39	5.39e-14	9.68e-12	yes	up	1.93	2.49	0.35	0.885	0.988	no	up	1.93	6.57	1.72	0.0679	0.432	no	up	1.93	674.4	8.38	3.81e-19	9.08e-17	yes	up	_	_	_	_
g5829	1.63	133.62	6.27	1.03e-14	2.13e-12	yes	up	7.85	1.02	-2.83	6.81e-05	0.0024	yes	down	7.85	113.42	3.84	3.19e-07	2.02e-05	yes	up	7.85	165.22	4.38	6.49e-09	1.58e-07	yes	up	voltage-gated K+ channel beta subunit [Aspergillus ruber CBS 135680]	_	Contig An01c0310, complete genome. Precursor	_
g7183	0.27	22.08	5.91	8.02e-13	9.91e-11	yes	up	0.41	0.48	0.19	1	1	no	up	0.41	8.61	4.09	2.63e-07	1.73e-05	yes	up	0.41	42.28	6.38	4.42e-14	2.94e-12	yes	up	putative hydrolases or acyltransferase [Aspergillus oryzae 3.042]	_	Predicted hydrolases or acyltransferases	_
g912	8.96	507.32	5.81	1.6e-13	2.43e-11	yes	up	9.05	8.88	-0.03	0.854	0.982	no	down	9.05	22.41	1.3	0.0752	0.458	no	up	9.05	379.22	5.37	1.07e-11	4.46e-10	yes	up	hypothetical protein Ao3042_04017 [Aspergillus oryzae 3.042]	_	_	_
g5188	0.2	12.54	5.4	1.03e-10	8.41e-09	yes	up	0.52	4.72	2.96	0.000198	0.00547	yes	up	0.52	0.14	0	1	1	no	no change	0.52	2.42	2.02	0.00824	0.0396	yes	up	hypothetical protein EURHEDRAFT_413852 [Aspergillus ruber CBS 135680]	_	_	_
g2814	4.99	171.88	5.08	1.82e-11	1.76e-09	yes	up	3.04	7.83	1.34	0.0673	0.368	no	up	3.04	9.24	1.57	0.0285	0.244	no	up	3.04	138.12	5.46	5.76e-12	2.53e-10	yes	up	integral membrane protein [Aspergillus ruber CBS 135680]	_	_	_
g6906	2.24	61.36	4.72	1.52e-10	1.2e-08	yes	up	49.68	10.09	-2.29	0.000478	0.0106	yes	down	49.68	1.22	-5.24	7.86e-12	2.22e-09	yes	down	49.68	41.13	-0.27	0.668	0.822	no	down	hypothetical protein NCU05317 [Neurospora crassa OR74A]	_	hypothetical protein	_
g804	0.26	7.83	4.46	9.04e-09	4.7e-07	yes	up	2.76	13.27	2.22	0.0022	0.0348	yes	up	2.76	2.48	-0.15	0.738	1	no	down	2.76	0.42	-2.46	0.000944	0.00664	yes	down	o-methyltransferase [Aspergillus ruber CBS 135680]	_	Pc18g06010	_
g3894	0.39	10.62	4.45	3.03e-09	1.71e-07	yes	up	0.14	1.92	3.07	0.000129	0.00394	yes	up	0.14	0.57	1.48	0.0721	0.448	no	up	0.14	17.89	6.23	2.71e-13	1.6e-11	yes	up	putative C4-dicarboxylate transporter/malic acid transport protein [Aspergillus ruber CBS 135680]	_	C4-dicarboxylate transporter/malic acid transport protein, putative	_
g4503	0.24	6.76	4.33	1.4e-08	6.89e-07	yes	up	0.03	0.1	0	1	1	no	no change	0.03	1.57	3.68	3.29e-06	0.00015	yes	up	0.03	2.83	4.49	2.3e-08	5.24e-07	yes	up	hypothetical protein EURHEDRAFT_551118 [Aspergillus ruber CBS 135680]	_	Permeases of the major facilitator superfamily	_
g7187	3.39	65.72	4.24	5.59e-09	3.01e-07	yes	up	0.63	2.16	1.63	0.0389	0.266	no	up	0.63	33.94	5.54	2.06e-11	4.94e-09	yes	up	0.63	79	6.76	2.82e-15	2.49e-13	yes	up	zinc binding dehydrogenase [Aspergillus niger CBS 513.88]	_	Catalytic activity: an alcohol + NAD(+) <=> an aldehyde or ketone + NADH. (EC 1.1.1.1)	_
g15	11.1	206.59	4.21	4.76e-09	2.62e-07	yes	up	57.96	27.61	-1.07	0.0759	0.392	no	down	57.96	32.84	-0.82	0.165	0.7	no	down	57.96	272.36	2.23	0.00114	0.00773	yes	up	mycelial catalase Cat1 [Aspergillus ruber CBS 135680]	_	Mycelial catalase Cat1	katE, CAT, catB, srpA
g3030	0.23	5.42	4.06	2.69e-07	9.71e-06	yes	up	0.04	0.34	0	1	1	no	no change	0.04	0.65	0	1	1	no	no change	0.04	4.74	5.11	8.34e-09	2e-07	yes	up	Pc20g09570 [Penicillium rubens Wisconsin 54-1255]	_	Pc20g09570	galM, GALM
g6310	1.64	28.2	4.02	1.45e-08	7.07e-07	yes	up	0.61	0.7	0.17	0.957	0.999	no	up	0.61	29.4	5.38	1.51e-11	4.06e-09	yes	up	0.61	10.12	3.85	1.67e-07	3.17e-06	yes	up	sulfate transporter, putative [Talaromyces stipitatus ATCC 10500]	_	hypothetical protein	SLC26A11
g3068	22.52	367.87	4.02	1.48e-08	7.19e-07	yes	up	228.61	11.68	-4.28	5.06e-09	1e-06	yes	down	228.61	19.86	-3.52	5.87e-07	3.55e-05	yes	down	228.61	635.76	1.48	0.0279	0.102	no	up	Pc13g15980 [Penicillium rubens Wisconsin 54-1255]	_	Pc13g15980	_
g3699	0.13	3.42	3.94	1.27e-06	3.81e-05	yes	up	0.04	0.09	0	1	1	no	no change	0.04	0	0	1	1	no	no change	0.04	1.69	3.68	2.25e-05	0.000258	yes	up	Pc16g10980 [Penicillium rubens Wisconsin 54-1255]	_	Pc16g10980	_
g280	0.96	15.11	3.84	1.05e-07	4.16e-06	yes	up	2.87	0.35	-2.72	0.000195	0.00543	yes	down	2.87	12.29	2.06	0.00441	0.0584	no	up	2.87	54.9	4.21	2.08e-08	4.75e-07	yes	up	xenobiotic compound monooxygenase, DszA family [Aspergillus ruber CBS 135680]	_	Xenobiotic compound monooxygenase, DszA family	_
g902	0.5	8.16	3.78	1.35e-05	0.000305	yes	up	1.11	0.4	0	1	1	no	no change	1.11	0.72	0	1	1	no	no change	1.11	16.37	3.77	3.97e-06	5.42e-05	yes	up	_	_	_	_
g6944	0.21	4.1	3.76	6.75e-07	2.2e-05	yes	up	0.07	0.29	0	1	1	no	no change	0.07	3.11	4.24	2e-07	1.39e-05	yes	up	0.07	10.85	6.01	2.07e-12	1.03e-10	yes	up	MFS transporter [Aspergillus ruber CBS 135680]	_	Putative uncharacterized protein	_
g5389	1.42	19.68	3.7	1.56e-07	5.89e-06	yes	up	1.94	3.91	0.98	0.199	0.646	no	up	1.94	10.75	2.41	0.000882	0.0156	yes	up	1.94	32.57	4	7.17e-08	1.48e-06	yes	up	hypothetical protein EURHEDRAFT_380353 [Aspergillus ruber CBS 135680]	_	Pc22g15100	YAT
g3257	3.23	37.92	3.51	3.55e-07	1.25e-05	yes	up	3.48	7.34	1.06	0.151	0.564	no	up	3.48	12.64	1.83	0.00985	0.109	no	up	3.48	134.14	5.23	2.24e-11	8.54e-10	yes	up	putative sulfate transporter [Aspergillus ruber CBS 135680]	_	Putative uncharacterized protein	SLC26A11
g1634	3.9	42.97	3.43	6.79e-07	2.2e-05	yes	up	17.36	10.12	-0.77	0.186	0.627	no	down	17.36	26.19	0.59	0.455	0.979	no	up	17.36	95.44	2.45	0.000398	0.00316	yes	up	hypothetical protein EURHEDRAFT_374061 [Aspergillus ruber CBS 135680]	_	Putative uncharacterized protein	_
g481	1.9	21.29	3.42	1.08e-06	3.3e-05	yes	up	3.72	5.26	0.49	0.581	0.914	no	up	3.72	11.24	1.57	0.0303	0.255	no	up	3.72	113.02	4.89	2.74e-10	8.75e-09	yes	up	hypothetical protein EURHEDRAFT_302798 [Aspergillus ruber CBS 135680]	_	Contig An14c0140, complete genome. Precursor	_
g7158	41.29	434.39	3.39	7.21e-07	2.3e-05	yes	up	33.34	12.58	-1.4	0.0238	0.193	no	down	33.34	31.87	-0.06	0.804	1	no	down	33.34	72.05	1.11	0.0958	0.248	no	up	class V chitinase, putative [Aspergillus fumigatus A1163]	_	Afu5g01400 (Alt. Locus), class V chitinase, putative, similar to chitinase ChiC (GI:11321444 [...]	E3.2.1.14
g5373	0.39	4.99	3.38	1.61e-06	4.63e-05	yes	up	2.97	0.94	-1.56	0.0174	0.155	no	down	2.97	2.81	-0.08	0.801	1	no	down	2.97	7.77	1.36	0.0446	0.144	no	up	putative siderochrome-iron transporter [Aspergillus ruber CBS 135680]	_	Siderochrome-iron transporter, putative	_
g7719	0.76	8.24	3.28	3.59e-06	9.48e-05	yes	up	2.31	1.92	-0.25	0.63	0.93	no	down	2.31	0.25	-2.78	0.000259	0.00577	yes	down	2.31	2.37	0.04	1	1	no	up	oxidoreductase, putative [Aspergillus clavatus NRRL 1]	_	Oxidoreductase, putative	E1.-.-.-
g1724	1.86	18.58	3.25	1.41e-06	4.15e-05	yes	up	1.81	9.46	2.32	0.00107	0.0201	yes	up	1.81	1.05	-0.73	0.196	0.764	no	down	1.81	50.11	4.72	5.22e-10	1.59e-08	yes	up	putative ABC transporter [Aspergillus ruber CBS 135680]	_	ABC transporter, putative	_
g5189	2.68	25.94	3.23	3.22e-06	8.6e-05	yes	up	2.12	10.73	2.29	0.00207	0.0333	yes	up	2.12	2.69	0.33	0.774	1	no	up	2.12	3.48	0.69	0.351	0.573	no	up	NAD(P)-binding protein [Aspergillus ruber CBS 135680]	_	15-hydroxyprostaglandin dehydrogenase (NAD(+))	_
g2983	0.18	2.49	3.21	0.000608	0.00782	yes	up	1.94	1.52	-0.33	0.637	0.932	no	down	1.94	2.91	0.56	0.581	1	no	up	1.94	0.34	-2.21	0.0191	0.0768	no	down	unnamed protein product [Aspergillus niger]	_	Contig An03c0100, complete genome	_
g6382	6.48	60.43	3.2	2.41e-06	6.59e-05	yes	up	15.38	3.13	-2.26	0.00064	0.0135	yes	down	15.38	9.89	-0.63	0.271	0.873	no	down	15.38	72.54	2.23	0.00116	0.00784	yes	up	hypothetical protein EURHEDRAFT_403185 [Aspergillus ruber CBS 135680]	_	Putative uncharacterized protein	_
g6895	39.56	360.42	3.18	2.45e-06	6.67e-05	yes	up	28.22	50.08	0.83	0.275	0.736	no	up	28.22	50.9	0.85	0.253	0.852	no	up	28.22	177.31	2.65	0.000141	0.00128	yes	up	putative NRPS-like enzyme [Aspergillus ruber CBS 135680]	_	Pc18g00380	_
g4209	4.3	39.91	3.18	3.19e-06	8.56e-05	yes	up	26.04	3.75	-2.76	5.72e-05	0.00209	yes	down	26.04	6.13	-2.07	0.00173	0.0275	yes	down	26.04	27.49	0.08	0.92	0.967	no	up	hypothetical protein EURHEDRAFT_526173 [Aspergillus ruber CBS 135680]	_	_	_
g916	6.68	60.83	3.17	2.78e-06	7.49e-05	yes	up	14.04	6.42	-1.12	0.0654	0.363	no	down	14.04	30.93	1.13	0.117	0.594	no	up	14.04	74.51	2.4	0.000506	0.00389	yes	up	putative alpha-galactosidase C [Aspergillus ruber CBS 135680]	_	Alpha-galactosidase	E3.2.1.22B, galA, rafA
g2658	0.97	9.4	3.15	4.98e-06	0.000125	yes	up	0.71	1.69	1.14	0.141	0.544	no	up	0.71	13.12	4.03	1.35e-07	9.95e-06	yes	up	0.71	43.02	5.73	1.3e-12	6.95e-11	yes	up	Arylsulphatase [Aspergillus ruber CBS 135680]	_	Putative uncharacterized protein	_
g7862	1.67	15.18	3.11	0.000155	0.00251	yes	up	1.86	6	1.64	0.0916	0.437	no	up	1.86	3.85	1.01	0.336	0.927	no	up	1.86	8.64	2.16	0.0115	0.0515	no	up	_	_	_	_
g5830	1.75	15.8	3.1	5.99e-06	0.000148	yes	up	0.56	3.5	2.45	0.00128	0.0228	yes	up	0.56	3.03	2.25	0.00307	0.044	yes	up	0.56	8.58	3.72	7.71e-07	1.27e-05	yes	up	MFS general substrate transporter [Aspergillus ruber CBS 135680]	_	Permease of the major facilitator superfamily	_
g6339	6.65	56.99	3.08	1.85e-05	0.000399	yes	up	5.68	14.85	1.37	0.103	0.463	no	up	5.68	15.29	1.41	0.0897	0.51	no	up	5.68	75.98	3.72	1.56e-06	2.37e-05	yes	up	_	_	_	_
g5079	7.31	58.74	2.99	1.05e-05	0.000246	yes	up	6.25	10.53	0.74	0.36	0.806	no	up	6.25	11.49	0.87	0.27	0.873	no	up	6.25	43.32	2.77	0.000102	0.000966	yes	up	hypothetical protein EURHEDRAFT_455361 [Aspergillus ruber CBS 135680]	_	DUF858 domain protein	NTMT1, METTL11A, NTM1
g2695	5.17	41.38	2.98	9.27e-06	0.000219	yes	up	4.13	2.91	-0.49	0.389	0.826	no	down	4.13	10.54	1.33	0.0694	0.439	no	up	4.13	40.34	3.26	6.13e-06	7.96e-05	yes	up	nucleotide-diphospho-sugar transferase [Aspergillus ruber CBS 135680]	_	Putative uncharacterized protein	MNN2
g5825	3.65	29.2	2.97	1.2e-05	0.000278	yes	up	23.14	2.83	-2.99	1.85e-05	0.000854	yes	down	23.14	90.19	1.96	0.00599	0.0745	no	up	23.14	41.64	0.84	0.207	0.415	no	up	TfdA family taurine dioxygenase [Aspergillus ruber CBS 135680]	_	TfdA family taurine dioxygenase, putative	_
g7186	6.9	54.1	2.95	1.06e-05	0.000246	yes	up	1.99	4.8	1.23	0.105	0.466	no	up	1.99	31.9	3.94	2.48e-07	1.65e-05	yes	up	1.99	67.95	5.03	1.44e-10	4.77e-09	yes	up	putative zinc-binding dehydrogenase family oxidoreductase [Aspergillus ruber CBS 135680]	_	Contig An07c0020, complete genome	_
g285	86.74	651.23	2.91	1.21e-05	0.000278	yes	up	31.69	110.18	1.79	0.012	0.118	no	up	31.69	179.75	2.5	0.000476	0.00945	yes	up	31.69	642.42	4.34	7.07e-09	1.71e-07	yes	up	putative methylenetetrahydrofolate reductase [Aspergillus ruber CBS 135680]	_	Methylenetetrahydrofolate reductase (EC 1.5.1.20)	metF, MTHFR
g6531	0.4	3.67	2.91	0.000727	0.00905	yes	up	0.58	1.04	0	1	1	no	no change	0.58	1.22	0	1	1	no	no change	0.58	0.94	0	1	1	no	no change	hypothetical protein EURHEDRAFT_400080 [Aspergillus ruber CBS 135680]	_	Tyrosine phosphatase family protein	SIW14, OCA3
g6338	27.18	199.91	2.87	1.49e-05	0.000328	yes	up	12.07	33.16	1.45	0.0444	0.287	no	up	12.07	68.68	2.5	0.000492	0.0097	yes	up	12.07	194.65	4	6.16e-08	1.31e-06	yes	up	MFS general substrate transporter [Aspergillus ruber CBS 135680]	_	Putative uncharacterized protein	_
g805	0.77	6.28	2.87	3.18e-05	0.000639	yes	up	4.15	21.54	2.35	0.00118	0.0215	yes	up	4.15	1.71	-1.23	0.0575	0.388	no	down	4.15	0.81	-2.22	0.0019	0.0118	yes	down	hypothetical protein EURHEDRAFT_446911 [Aspergillus ruber CBS 135680]	_	Putative uncharacterized protein	_
g4852	30.99	219.57	2.82	1.95e-05	0.000416	yes	up	70.93	11.63	-2.6	0.000101	0.00323	yes	down	70.93	679.52	3.26	8.3e-06	0.000328	yes	up	70.93	664.62	3.23	5.97e-06	7.81e-05	yes	up	Pc18g03170 [Penicillium rubens Wisconsin 54-1255]	_	_	_
g6195	2.33	17.1	2.82	2.4e-05	0.000503	yes	up	4.31	6.11	0.49	0.562	0.909	no	up	4.31	4.64	0.1	1	1	no	up	4.31	22.45	2.35	0.000663	0.00489	yes	up	MFS general substrate transporter [Aspergillus ruber CBS 135680]	_	Putative uncharacterized protein	_
g4028	0.4	3.43	2.82	0.000369	0.00527	yes	up	0.33	0.21	0	1	1	no	no change	0.33	0	0	1	1	no	no change	0.33	1.66	2.03	0.0163	0.0678	no	up	Pc06g01380 [Penicillium rubens Wisconsin 54-1255]	_	Pc06g01380	_
g257	5.44	38.71	2.81	2.41e-05	0.000503	yes	up	4.52	1.5	-1.53	0.0191	0.164	no	down	4.52	89.73	4.28	2.1e-08	2.03e-06	yes	up	4.52	84.91	4.2	2.04e-08	4.7e-07	yes	up	Pc13g02060 [Penicillium rubens Wisconsin 54-1255]	_	Pc13g02060	_
g5128	0.18	1.86	2.81	0.000977	0.0116	yes	up	0.36	0.64	0	1	1	no	no change	0.36	0.76	0	1	1	no	no change	0.36	1.98	2.18	0.00746	0.0365	yes	up	hypothetical protein EURHEDRAFT_108769 [Aspergillus ruber CBS 135680]	_	_	_
g3029	0.38	3.25	2.8	2.21e-05	0.000466	yes	up	2.38	5.08	1.06	0.148	0.557	no	up	2.38	0.31	-2.6	9.64e-05	0.00258	yes	down	2.38	1.88	-0.32	0.624	0.796	no	down	Pc20g09580 [Penicillium rubens Wisconsin 54-1255]	_	Pc20g09580	malZ
g1465	13.08	89.37	2.76	2.63e-05	0.000541	yes	up	10.72	12.85	0.26	0.818	0.977	no	up	10.72	33.6	1.64	0.0208	0.193	no	up	10.72	124.51	3.53	1e-06	1.59e-05	yes	up	hypothetical protein EURHEDRAFT_515563 [Aspergillus ruber CBS 135680]	_	Similarity: the ORF shows also weak similarity to proteins containing PTS domain	_
g5790	1.58	11.17	2.75	9.26e-05	0.00161	yes	up	4	1.74	-1.16	0.0909	0.435	no	down	4	26.08	2.67	0.0003	0.00646	yes	up	4	36.37	3.15	1.52e-05	0.000181	yes	up	putative short chain oxidoreductase/dehydrogenase [Aspergillus ruber CBS 135680]	_	Short chain oxidoreductase/dehydrogenase, putative	_
g1754	0.21	1.97	2.74	0.000111	0.00188	yes	up	0.94	0.14	-2.12	0.00291	0.0424	yes	down	0.94	1	0.08	1	1	no	up	0.94	17.03	4.04	7.19e-08	1.48e-06	yes	up	MFS general substrate transporter [Aspergillus ruber CBS 135680]	_	Putative uncharacterized protein	_
g4512	0.82	5.99	2.73	5.33e-05	0.001	yes	up	1.61	1.28	-0.31	0.572	0.913	no	down	1.61	2.93	0.83	0.277	0.879	no	up	1.61	12.66	2.9	4.42e-05	0.000463	yes	up	Chromate transporter [Penicillium roqueforti FM164]	_	Pc16g03450	_
g1635	8.46	55.77	2.71	3.81e-05	0.000746	yes	up	70.59	23.22	-1.6	0.011	0.111	no	down	70.59	36.65	-0.94	0.115	0.587	no	down	70.59	137.45	0.96	0.149	0.332	no	up	amino acid transporter [Aspergillus ruber CBS 135680]	_	Choline transport protein, putative	_
g4172	5.81	38.31	2.7	3.91e-05	0.000759	yes	up	2.7	14.06	2.34	0.0011	0.0206	yes	up	2.7	6.02	1.13	0.12	0.602	no	up	2.7	47.36	4.08	3.58e-08	7.89e-07	yes	up	WD40 repeat-like protein [Aspergillus ruber CBS 135680]	_	WD repeat protein	NOL10, ENP2
g8233	10.97	69.79	2.66	5.57e-05	0.00104	yes	up	0.96	19.6	4.22	1.58e-07	1.82e-05	yes	up	0.96	11.49	3.45	1.27e-05	0.000475	yes	up	0.96	41.04	5.28	9.33e-11	3.18e-09	yes	up	hypothetical protein EURHEDRAFT_410662 [Aspergillus ruber CBS 135680]	_	_	_
g5828	3.73	23.95	2.65	5.41e-05	0.00101	yes	up	8.65	6.95	-0.31	0.53	0.896	no	down	8.65	19.33	1.15	0.112	0.581	no	up	8.65	33.51	1.94	0.00429	0.0232	yes	up	hypothetical protein EURHEDRAFT_373878 [Aspergillus ruber CBS 135680]	_	Afu1g17150 (Alt. Locus), C6 transcription factor, putative	_
g2009	3.89	24.92	2.65	0.000183	0.00292	yes	up	1.21	5.39	2.07	0.0275	0.212	no	up	1.21	7.23	2.48	0.00464	0.0611	no	up	1.21	35.14	4.75	2.81e-08	6.33e-07	yes	up	_	_	_	_
g7773	503.96	3148.68	2.64	5.18e-05	0.000978	yes	up	185.59	79.3	-1.23	0.0447	0.288	no	down	185.59	509.78	1.46	0.041	0.31	no	up	185.59	1967.73	3.41	2.12e-06	3.09e-05	yes	up	glycoside hydrolase, partial [Aspergillus ruber CBS 135680]	_	Predicted protein	E3.2.1.14
g1901	32	195.97	2.61	6.61e-05	0.00121	yes	up	7.69	2.7	-1.48	0.029	0.219	no	down	7.69	104.03	3.74	6.9e-07	3.98e-05	yes	up	7.69	1195.54	7.26	3.45e-17	5.12e-15	yes	up	hypothetical protein EURHEDRAFT_415548 [Aspergillus ruber CBS 135680]	_	_	_
g1007	10.05	60.87	2.59	7.31e-05	0.00132	yes	up	35.99	8.79	-2.02	0.00185	0.0304	yes	down	35.99	173.44	2.27	0.00148	0.0239	yes	up	35.99	173.77	2.27	0.000957	0.0067	yes	up	alpha-amylase [Aspergillus ruber CBS 135680]	_	Oligo-1,6-glucosidase	malZ
g3128	40.15	234.42	2.54	8.96e-05	0.00157	yes	up	7.71	182.7	4.55	3.92e-09	8.17e-07	yes	up	7.71	38.58	2.31	0.00129	0.0212	yes	up	7.71	125.67	4.01	6.25e-08	1.32e-06	yes	up	sure-like protein [Aspergillus ruber CBS 135680]	_	Contig An18c0130, complete genome. (EC 3.1.3.1)	_
g7157	85.19	494.36	2.54	9.3e-05	0.00161	yes	up	40.73	16.18	-1.33	0.0327	0.238	no	down	40.73	89.94	1.14	0.115	0.589	no	up	40.73	86.88	1.09	0.102	0.26	no	up	conserved hypothetical protein [Arthroderma otae CBS 113480]	_	_	_
g6327	3.64	21.57	2.53	0.000113	0.0019	yes	up	3.18	7.92	1.29	0.0816	0.408	no	up	3.18	11.95	1.88	0.00921	0.104	no	up	3.18	16.52	2.34	0.000791	0.00568	yes	up	nucleotide-diphospho-sugar transferase [Aspergillus ruber CBS 135680]	_	Putative uncharacterized protein	MNN2
g1664	1.52	9.23	2.53	0.000311	0.00459	yes	up	3.6	50.03	3.76	9.07e-07	7.64e-05	yes	up	3.6	23.63	2.68	0.000302	0.00646	yes	up	3.6	5.44	0.58	0.439	0.656	no	up	Mn superoxide dismutase MnSOD [Aspergillus ruber CBS 135680]	_	Superoxide dismutase (EC 1.15.1.1); Destroys radicals which are normally produced within the [...]	SOD2
g5363	0.91	5.66	2.51	0.000185	0.00293	yes	up	3.67	1.02	-1.75	0.00879	0.0939	no	down	3.67	0.7	-2.24	0.00122	0.0205	yes	down	3.67	25.85	2.78	8.33e-05	0.000803	yes	up	ZIP zinc transporter [Aspergillus ruber CBS 135680]	_	ZIP Zinc transporter, putative	SLC39A1_2_3, ZIP1_2_3
g3622	329.57	1808.46	2.46	0.00014	0.00231	yes	up	138.63	335.27	1.27	0.0787	0.4	no	up	138.63	372.19	1.42	0.0461	0.336	no	up	138.63	1721.46	3.63	5.52e-07	9.37e-06	yes	up	serine hydroxymethyltransferase [Aspergillus ruber CBS 135680]	_	Serine hydroxymethyltransferase (EC 2.1.2.1); Interconversion of serine and glycine (By simi [...]	glyA, SHMT
g682	5.88	32.22	2.43	0.000173	0.00278	yes	up	5.08	1.01	-2.22	0.00111	0.0207	yes	down	5.08	10.51	1.03	0.161	0.694	no	up	5.08	70.48	3.77	2.82e-07	5.09e-06	yes	up	hypothetical protein EURHEDRAFT_502737 [Aspergillus ruber CBS 135680]	_	PTH11-like integral membrane protein	_
g5400	7.84	41.7	2.4	0.000195	0.00306	yes	up	3.25	17.39	2.38	0.00092	0.0182	yes	up	3.25	12.8	1.95	0.00629	0.0776	no	up	3.25	43.25	3.69	4.03e-07	7.02e-06	yes	up	high affinity methionine permease [Aspergillus ruber CBS 135680]	_	High-affinity methionine permease	_
g3721	47.03	247.13	2.39	0.000195	0.00306	yes	up	55.44	44.75	-0.31	0.524	0.894	no	down	55.44	104.45	0.91	0.216	0.796	no	up	55.44	210.42	1.92	0.00461	0.0247	yes	up	glycine dehydrogenase [Aspergillus ruber CBS 135680]	_	Glycine dehydrogenase	GLDC, gcvP
g502	42.28	221.77	2.39	0.000217	0.00333	yes	up	34.96	92.58	1.4	0.0539	0.325	no	up	34.96	61.74	0.82	0.281	0.885	no	up	34.96	391.73	3.48	1.55e-06	2.36e-05	yes	up	hypothetical protein EURHEDRAFT_409904 [Aspergillus ruber CBS 135680]	_	_	_
g224	15.43	80.99	2.38	0.000205	0.00318	yes	up	4.48	55.64	3.61	1.18e-06	9.47e-05	yes	up	4.48	9.68	1.09	0.131	0.633	no	up	4.48	49.04	3.42	1.92e-06	2.83e-05	yes	up	MFS general substrate transporter [Aspergillus ruber CBS 135680]	_	Permeases of the major facilitator superfamily	_
g4624	39.05	204.14	2.38	0.000206	0.00319	yes	up	11.54	18.57	0.68	0.386	0.825	no	up	11.54	30.82	1.41	0.0496	0.354	no	up	11.54	107.55	3.21	7.1e-06	9.06e-05	yes	up	flavin-binding monooxygenase-like protein [Aspergillus ruber CBS 135680]	_	Flavin-binding monooxygenase-like protein	_
g1332	17.05	88.96	2.38	0.00022	0.00337	yes	up	60	24.32	-1.3	0.0353	0.25	no	down	60	7.32	-3.02	1.19e-05	0.000452	yes	down	60	39.65	-0.6	0.358	0.579	no	down	hypothetical protein EURHEDRAFT_412813 [Aspergillus ruber CBS 135680]	_	_	_
g3976	24.44	127.14	2.37	0.000219	0.00336	yes	up	17.08	17.75	0.06	0.941	0.997	no	up	17.08	29.96	0.81	0.284	0.89	no	up	17.08	181.08	3.4	2.3e-06	3.29e-05	yes	up	amino acid transporter [Aspergillus ruber CBS 135680]	_	Amino acid transporters	_
g4970	20.11	104.18	2.37	0.000228	0.00348	yes	up	51.31	43.42	-0.24	0.596	0.917	no	down	51.31	72.05	0.49	0.552	1	no	up	51.31	112.92	1.14	0.0886	0.234	no	up	HAD-superfamily hydrolase [Aspergillus ruber CBS 135680]	_	Phosphatidyl synthase	_
g4855	1.33	7.21	2.35	0.000248	0.00375	yes	up	0.41	0.3	-0.35	0.544	0.901	no	down	0.41	1.93	1.99	0.00536	0.0681	no	up	0.41	6.48	3.69	4.05e-07	7.04e-06	yes	up	hypothetical protein EURHEDRAFT_467667 [Aspergillus ruber CBS 135680]	_	Predicted mechanosensitive ion channel	_
g8180	6.43	32.26	2.31	0.000314	0.00461	yes	up	3.68	2.76	-0.4	0.458	0.862	no	down	3.68	12.3	1.71	0.0165	0.161	no	up	3.68	14.73	1.97	0.004	0.0219	yes	up	hypothetical protein EURHEDRAFT_501788 [Aspergillus ruber CBS 135680]	_	_	_
g2129	16.52	81.6	2.3	0.000321	0.0047	yes	up	12.24	12.16	-0.01	0.865	0.986	no	down	12.24	16.01	0.38	0.664	1	no	up	12.24	111.19	3.17	8.25e-06	0.000103	yes	up	FAD binding domain protein [Aspergillus ruber CBS 135680]	_	FAD binding domain protein	_
g135	5.27	26.04	2.28	0.000345	0.00501	yes	up	5.99	19.51	1.69	0.0185	0.16	no	up	5.99	7.38	0.3	0.768	1	no	up	5.99	25.5	2.07	0.00242	0.0144	yes	up	hypothetical protein EURHEDRAFT_409665 [Aspergillus ruber CBS 135680]	_	Putative uncharacterized protein	NOM1
g279	16.73	81.51	2.28	0.000359	0.00518	yes	up	13.46	9.71	-0.47	0.389	0.826	no	down	13.46	66.69	2.3	0.0013	0.0212	yes	up	13.46	123.64	3.19	7.68e-06	9.71e-05	yes	up	oxidoreductase [Aspergillus ruber CBS 135680]	_	Oxidoreductase, zinc-binding dehydrogenase family, putative	_
g8259	2.58	12.91	2.28	0.000436	0.00607	yes	up	2.24	3.97	0.8	0.313	0.774	no	up	2.24	3.96	0.79	0.302	0.905	no	up	2.24	28.14	3.59	9.47e-07	1.52e-05	yes	up	hypothetical protein EURHEDRAFT_511159 [Aspergillus ruber CBS 135680]	_	Similarity to neuronal apoptosis inhibitory protein Naip1 - Mus musculus	_
g2422	2.61	12.96	2.27	0.000456	0.00625	yes	up	198.87	9.49	-4.37	2.92e-09	6.61e-07	yes	down	198.87	0.95	-7.57	2.55e-18	5.03e-15	yes	down	198.87	21.19	-3.22	5.64e-06	7.43e-05	yes	down	putative amino acid permease [Aspergillus ruber CBS 135680]	_	Amino acid permease (Dip5), putative	YAT
g1753	4.49	21.82	2.26	0.00045	0.0062	yes	up	4.95	2.54	-0.94	0.131	0.519	no	down	4.95	9.09	0.86	0.249	0.848	no	up	4.95	103.67	4.36	7.34e-09	1.76e-07	yes	up	putative NAD dependent epimerase/dehydratase [Aspergillus ruber CBS 135680]	_	NAD dependent epimerase/dehydratase, putative	_
g914	0.46	2.57	2.25	0.000868	0.0105	yes	up	0.35	0.71	0.85	0.343	0.796	no	up	0.35	0.27	0	1	1	no	no change	0.35	3.8	3.12	3.04e-05	0.000334	yes	up	allantoinase [Aspergillus ruber CBS 135680]	_	Pc20g11190	allB
g6672	0.51	2.76	2.23	0.00405	0.0356	yes	up	1.77	1.45	-0.27	0.677	0.943	no	down	1.77	1.38	-0.34	0.623	1	no	down	1.77	2.36	0.4	0.604	0.784	no	up	hypothetical protein AOR_1_984114 [Aspergillus oryzae RIB40]	_	_	_
g5556	323.15	1506.13	2.22	0.000467	0.00638	yes	up	312.64	324.82	0.06	0.935	0.996	no	up	312.64	740.73	1.24	0.0836	0.49	no	up	312.64	1616.65	2.37	0.000584	0.00439	yes	up	phospholipid methyltransferase [Aspergillus ruber CBS 135680]	_	Phospholipid methyltransferase	OPI3
g1762	7.92	37.34	2.22	0.000471	0.00641	yes	up	5.71	34.3	2.57	0.00038	0.00893	yes	up	5.71	9.31	0.7	0.368	0.948	no	up	5.71	30.94	2.42	0.000483	0.00375	yes	up	NAF1-domain-containing protein [Aspergillus ruber CBS 135680]	_	snoRNP assembly factor Naf1, putative	NAF1
g888	58.27	271.2	2.22	0.000543	0.00713	yes	up	130.81	227.2	0.8	0.3	0.765	no	up	130.81	122.39	-0.1	0.774	1	no	down	130.81	285.98	1.13	0.0928	0.242	no	up	_	_	_	_
g4369	5.14	24.32	2.22	0.000577	0.00747	yes	up	6.83	14.09	1.03	0.168	0.596	no	up	6.83	12.06	0.81	0.29	0.895	no	up	6.83	35.44	2.36	0.000702	0.00514	yes	up	hypothetical protein EURHEDRAFT_388526 [Aspergillus ruber CBS 135680]	_	Afu4g12800 (Alt. Locus), puatative oxidoreductase, (1.14.13.-)	_
g2128	29.19	135.67	2.21	0.000485	0.00655	yes	up	20.65	3.46	-2.54	0.000154	0.00446	yes	down	20.65	114.35	2.46	0.000582	0.0111	yes	up	20.65	175.95	3.08	1.37e-05	0.000165	yes	up	hypothetical protein EURHEDRAFT_337560 [Aspergillus ruber CBS 135680]	_	Putative uncharacterized protein	_
g6635	4.13	19.42	2.21	0.000513	0.00687	yes	up	6.75	2.69	-1.3	0.0361	0.253	no	down	6.75	3.5	-0.93	0.122	0.605	no	down	6.75	39.48	2.53	0.000262	0.0022	yes	up	alkaline serine protease AorO [Aspergillus ruber CBS 135680]	_	Alkaline serine protease AorO, putativeFuSED1 protease Precursor (EC 3.4.14.9);	TPP1, CLN2
g2008	6.05	28.41	2.21	0.000686	0.00864	yes	up	1.78	5.23	1.5	0.0617	0.351	no	up	1.78	6.07	1.71	0.0274	0.236	no	up	1.78	37.3	4.31	2.96e-08	6.65e-07	yes	up	hypothetical protein EURHEDRAFT_515277 [Aspergillus ruber CBS 135680]	_	_	_
g6493	1188.51	5467.95	2.2	0.000509	0.00684	yes	up	478.84	1440.22	1.59	0.0265	0.207	no	up	478.84	1801.07	1.91	0.00711	0.0862	no	up	478.84	5610.62	3.55	9.05e-07	1.46e-05	yes	up	cobalamin-independent methionine synthase MetH/D [Aspergillus ruber CBS 135680]	_	RIB40 genomic DNA, SC023	metE
g414	7.49	34.67	2.2	0.000632	0.00808	yes	up	3.54	10.25	1.51	0.0429	0.281	no	up	3.54	11.44	1.66	0.0236	0.213	no	up	3.54	42.54	3.55	1.41e-06	2.17e-05	yes	up	dicarboxylate transporter [Aspergillus ruber CBS 135680]	_	Putative uncharacterized protein	SLC25A10, DIC
g2917	12.06	55.52	2.19	0.000576	0.00747	yes	up	15.73	22.65	0.52	0.53	0.896	no	up	15.73	18.56	0.24	0.838	1	no	up	15.73	103.26	2.71	0.000109	0.00102	yes	up	MFS general substrate transporter [Aspergillus ruber CBS 135680]	_	Putative uncharacterized protein	_
g3137	0.6	3.1	2.19	0.000894	0.0108	yes	up	0.34	1.45	1.82	0.018	0.158	no	up	0.34	0.21	0	1	1	no	no change	0.34	0.63	0.73	0.324	0.547	no	up	glucose dehydrogenase [Aspergillus ruber CBS 135680]	_	_	_
g5813	0.18	1.18	2.19	0.00911	0.0656	no	up	0.4	0	0	1	1	no	no change	0.4	0.79	0.83	0.432	0.974	no	up	0.4	2.49	2.37	0.00353	0.0198	yes	up	Pc16g03060 [Penicillium rubens Wisconsin 54-1255]	_	Pc16g03060	_
g3174	8.67	39.77	2.18	0.000553	0.00724	yes	up	3.64	12.21	1.72	0.016	0.145	no	up	3.64	7.42	1.01	0.166	0.706	no	up	3.64	31.34	3.07	1.42e-05	0.00017	yes	up	Utp14-domain-containing protein [Aspergillus ruber CBS 135680]	_	Small nucleolar ribonucleoprotein complex subunit Utp14, putatrive	UTP14
g4082	12.15	55.06	2.17	0.000651	0.00829	yes	up	18	23.75	0.4	0.662	0.939	no	up	18	24.25	0.43	0.618	1	no	up	18	75.37	2.06	0.00267	0.0156	yes	up	Fcf1-domain-containing protein [Aspergillus ruber CBS 135680]	_	Afu2g03340 (Alt. Locus), DUF652 domain protein, contains a DUF652 domain	UTP24, FCF1
g6560	24.92	110.68	2.15	0.000716	0.00894	yes	up	30.66	32.44	0.08	0.974	1	no	up	30.66	40.53	0.4	0.647	1	no	up	30.66	96.4	1.65	0.015	0.0637	no	up	P-loop containing nucleoside triphosphate hydrolase protein [Aspergillus ruber CBS 135680]	_	Kinase-related protein	_
g5194	1.2	5.58	2.13	0.00211	0.0212	yes	up	0.14	0.22	0	1	1	no	no change	0.14	1.48	2.72	0.00455	0.06	no	up	0.14	0.74	0	1	1	no	no change	hypothetical protein FOWG_17753 [Fusarium oxysporum f. sp. lycopersici MN25]	_	_	_
g4010	2.13	9.55	2.11	0.00104	0.0122	yes	up	2.69	3.62	0.42	0.654	0.936	no	up	2.69	2.22	-0.27	0.611	1	no	down	2.69	9.08	1.72	0.0123	0.0543	no	up	endoplasmic reticulum-resident kdel protein [Aspergillus ruber CBS 135680]	_	Pc15g00250	_
g2301	14.97	64.51	2.1	0.000867	0.0105	yes	up	12.58	36.12	1.51	0.0357	0.252	no	up	12.58	29.46	1.22	0.0922	0.519	no	up	12.58	57.06	2.17	0.00157	0.0101	yes	up	tryptophanyl-tRNA synthetase [Aspergillus ruber CBS 135680]	_	Afu6g05340 (Alt. Locus), tryptophanyl-tRNA synthetase, putative, similar to ref:NP_010554.1: [...]	WARS, trpS
g6065	0.16	1.01	2.09	0.00342	0.0314	yes	up	0.24	0.92	1.58	0.0491	0.308	no	up	0.24	0.09	0	1	1	no	no change	0.24	0.57	0.98	0.205	0.413	no	up	hypothetical protein EURHEDRAFT_482872 [Aspergillus ruber CBS 135680]	_	_	_
g2575	0.42	2.12	2.09	0.00874	0.0636	no	up	0.48	1.17	1.13	0.253	0.71	no	up	0.48	0.4	0	1	1	no	no change	0.48	3.13	2.48	0.00238	0.0142	yes	up	Pc22g25260 [Penicillium rubens Wisconsin 54-1255]	_	_	_
g7933	89.67	379.83	2.08	0.000926	0.0111	yes	up	27.67	61.34	1.15	0.119	0.494	no	up	27.67	158.73	2.52	0.000467	0.00927	yes	up	27.67	349.34	3.65	5.27e-07	9.03e-06	yes	up	hypothetical protein EURHEDRAFT_483343 [Aspergillus ruber CBS 135680]	_	Putative uncharacterized protein	_
g2517	306.62	1293.04	2.08	0.000945	0.0113	yes	up	456.01	461.51	0.02	0.889	0.988	no	up	456.01	674.98	0.57	0.476	0.986	no	up	456.01	1209.86	1.41	0.0357	0.122	no	up	eukaryotic translation initiation factor 1A, partial [Aspergillus ruber CBS 135680]	_	Similarity to EST an_3273 Aspergillus niger ; Seems to be required for maximal rate of prote [...]	EIF1A
g1179	10.55	44.82	2.08	0.00101	0.0119	yes	up	4.74	19.79	2.04	0.00482	0.0608	no	up	4.74	9.35	0.97	0.201	0.771	no	up	4.74	35.58	2.88	4.96e-05	0.00051	yes	up	RNA binding protein Rnp24 [Aspergillus ruber CBS 135680]	_	Putative uncharacterized protein	_
g5127	1.41	6.27	2.08	0.0168	0.104	no	up	2.52	4.2	0.71	0.545	0.901	no	up	2.52	4.92	0.94	0.394	0.961	no	up	2.52	8.76	1.76	0.0365	0.124	no	up	unnamed protein product [Aspergillus niger]	_	_	_
g5936	18.14	76.65	2.07	0.00102	0.0121	yes	up	12.5	34.9	1.47	0.042	0.278	no	up	12.5	20.98	0.74	0.336	0.927	no	up	12.5	67.66	2.43	0.000475	0.00371	yes	up	putative ribosomal RNA processing protein [Aspergillus ruber CBS 135680]	_	Ribosomal RNA processing protein, putative	RRP1
g879	1.55	6.85	2.07	0.00283	0.027	yes	up	2.66	3.92	0.54	0.581	0.914	no	up	2.66	5.89	1.12	0.174	0.722	no	up	2.66	12.35	2.17	0.00275	0.0161	yes	up	hypothetical protein G647_02206 [Cladophialophora carrionii CBS 160.54]	_	_	ACR2
g3628	17.51	73.5	2.06	0.00104	0.0122	yes	up	6.75	29.27	2.1	0.00357	0.0489	yes	up	6.75	15.91	1.22	0.0918	0.518	no	up	6.75	65.76	3.27	5.31e-06	7.08e-05	yes	up	hypothetical protein EURHEDRAFT_472849 [Aspergillus ruber CBS 135680]	_	_	_
g6268	41.55	173.86	2.06	0.00105	0.0123	yes	up	23.14	79.38	1.77	0.0137	0.129	no	up	23.14	27.87	0.27	0.801	1	no	up	23.14	145.39	2.65	0.000155	0.0014	yes	up	hypothetical protein EURHEDRAFT_461496 [Aspergillus ruber CBS 135680]	_	60S acidic ribosomal protein P0, putative (AFU_orthologue; AFUA_5G13470)	MRT4
g3007	0.59	2.78	2.06	0.00167	0.0178	yes	up	0.86	0.83	-0.05	0.897	0.988	no	down	0.86	2.15	1.23	0.106	0.56	no	up	0.86	3.79	2.02	0.0036	0.02	yes	up	amidase signature enzyme [Aspergillus ruber CBS 135680]	_	Pc20g15160	_
g5624	19.33	80.41	2.05	0.00109	0.0127	yes	up	30.77	31.35	0.03	0.901	0.988	no	up	30.77	41.7	0.44	0.607	1	no	up	30.77	100.36	1.7	0.0118	0.0522	no	up	hypothetical protein EURHEDRAFT_376317 [Aspergillus ruber CBS 135680]	_	Putative uncharacterized protein	_
g7718	3.7	15.59	2.05	0.00121	0.0137	yes	up	11.47	16.31	0.5	0.548	0.903	no	up	11.47	2.49	-2.16	0.00111	0.0188	yes	down	11.47	0.65	-3.95	1.38e-07	2.68e-06	yes	down	AMP-binding enzyme domain protein [Aspergillus clavatus NRRL 1]	_	AMP-binding enzyme domain protein	_
g5297	68.94	284.42	2.04	0.00111	0.0128	yes	up	32.12	17.01	-0.91	0.124	0.505	no	down	32.12	194.75	2.6	0.000301	0.00646	yes	up	32.12	343.84	3.42	2.06e-06	3.01e-05	yes	up	composite domain of metallo-dependent hydrolase, partial [Aspergillus ruber CBS 135680]	_	Imidazolonepropionase and related amidohydrolases	_
g4579	6.04	25.11	2.04	0.00112	0.0129	yes	up	128.59	9.05	-3.81	8.99e-08	1.13e-05	yes	down	128.59	3.69	-5.09	2.67e-11	6.22e-09	yes	down	128.59	17.52	-2.87	3.94e-05	0.000416	yes	down	sodium P-type ATPase, putative [Aspergillus flavus NRRL3357]	_	Sodium P-type ATPase, putative	_
g4094	19.49	80.41	2.04	0.0014	0.0153	yes	up	10.99	32.15	1.54	0.0392	0.267	no	up	10.99	18.53	0.75	0.36	0.939	no	up	10.99	53.5	2.27	0.00131	0.0087	yes	up	putative DNA-directed RNA polymerase I 13.1 kDa polypeptide [Aspergillus ruber CBS 135680]	_	Afu2g05480 (Alt. Locus), DNA-directed RNA polymerase I 13.1 kDa polypeptide, putative, (2.7.7.6)	RPA12, ZNRD1
g4587	0.27	1.42	2.04	0.0155	0.0985	no	up	0.27	0.14	0	1	1	no	no change	0.27	0.97	0	1	1	no	no change	0.27	0.78	0	1	1	no	no change	methionine permease [Aspergillus ruber CBS 135680]	_	Amino acid transporters	_
g2085	69.65	284.92	2.03	0.00117	0.0133	yes	up	46.58	28.33	-0.72	0.211	0.664	no	down	46.58	113.56	1.28	0.0736	0.453	no	up	46.58	377.73	3.02	1.95e-05	0.000228	yes	up	MFS sugar transporter [Aspergillus kawachii IFO 4308]	_	Function: K. lactis HGT1 is a high affinity glucose transporter. Precursor	_
g408	18.21	74.56	2.03	0.0012	0.0137	yes	up	2.66	0.79	-1.63	0.0144	0.135	no	down	2.66	20.48	2.9	6.73e-05	0.00194	yes	up	2.66	75.05	4.77	5.3e-10	1.61e-08	yes	up	D-lactate dehydrogenase, putative [Aspergillus flavus NRRL3357]	_	D-lactate dehydrogenase, putative	_
g5263	21.88	88.97	2.02	0.00123	0.0139	yes	up	10.94	39.24	1.83	0.0102	0.105	no	up	10.94	16.71	0.61	0.439	0.975	no	up	10.94	67.5	2.61	0.000169	0.0015	yes	up	NUC189-domain-containing protein [Aspergillus ruber CBS 135680]	_	Small nucleolar ribonucleoprotein complex component (Utp5), putative	UTP5, WDR43
g5883	35.47	144.26	2.02	0.00123	0.0139	yes	up	25.98	80.6	1.63	0.0232	0.19	no	up	25.98	51.01	0.97	0.186	0.744	no	up	25.98	145.06	2.48	0.000348	0.00282	yes	up	hypothetical protein EURHEDRAFT_373934 [Aspergillus ruber CBS 135680]	_	Predicted protein	_
g3069	1.03	4.48	2.02	0.00149	0.0163	yes	up	1.32	0.82	-0.63	0.312	0.772	no	down	1.32	3.68	1.41	0.0544	0.374	no	up	1.32	8.76	2.64	0.000188	0.00165	yes	up	putative siderochrome-iron transporter [Aspergillus ruber CBS 135680]	_	Afu7g04730 (Alt. Locus), siderochrome-iron transporter, putative	_
g3108	23.28	94.02	2.01	0.0013	0.0146	yes	up	12.31	49.33	1.99	0.00531	0.0656	no	up	12.31	22.08	0.84	0.264	0.865	no	up	12.31	65.34	2.4	0.000512	0.00393	yes	up	ribosome biogenesis protein Kri1 [Aspergillus clavatus NRRL 1]	_	Ribosome biogenesis protein Kri1	KRI1
g7093	9.14	37.08	2.01	0.00142	0.0156	yes	up	6.81	14.08	1.04	0.165	0.592	no	up	6.81	12.95	0.92	0.221	0.807	no	up	6.81	33.95	2.3	0.000896	0.00634	yes	up	aldo-keto reductase [Aspergillus ruber CBS 135680]	_	Putative uncharacterized protein	_
g1119	36.9	147.83	2	0.00138	0.0153	yes	up	6.25	49.76	2.97	5.08e-05	0.00191	yes	up	6.25	23.09	1.87	0.0093	0.105	no	up	6.25	97.6	3.94	1.03e-07	2.08e-06	yes	up	hypothetical protein EURHEDRAFT_498291 [Aspergillus ruber CBS 135680]	_	RNA binding protein	NOP6
g1657	17.34	69.43	2	0.00139	0.0153	yes	up	8.84	42.07	2.24	0.00178	0.0296	yes	up	8.84	13.48	0.6	0.442	0.975	no	up	8.84	49.06	2.46	0.000383	0.00306	yes	up	SDA1-domain-containing protein [Aspergillus ruber CBS 135680]	_	SDA1 domain protein	SDA1, SDAD1
g91	19.74	79.06	2	0.0015	0.0163	yes	up	6.75	36.07	2.4	0.00101	0.0192	yes	up	6.75	12.84	0.92	0.23	0.822	no	up	6.75	43.07	2.66	0.00017	0.00151	yes	up	hypothetical protein EURHEDRAFT_533336 [Aspergillus ruber CBS 135680]	_	Putative uncharacterized protein	TMA16
g7313	1.71	7.16	2	0.00181	0.0188	yes	up	1.1	3.02	1.38	0.0703	0.376	no	up	1.1	3.14	1.43	0.0587	0.393	no	up	1.1	8.75	2.88	6.03e-05	0.000606	yes	up	MFS transporter [Aspergillus ruber CBS 135680]	_	Putative uncharacterized protein	_
g8088	24.69	98.23	1.99	0.00143	0.0156	yes	up	17.5	15.19	-0.2	0.637	0.932	no	down	17.5	10.31	-0.76	0.196	0.764	no	down	17.5	75.7	2.11	0.00205	0.0126	yes	up	choline transport protein [Aspergillus ruber CBS 135680]	_	Choline transport protein Ctr, putative	CTR, HNM1
g6692	13.81	55.04	1.99	0.00158	0.017	yes	up	11.3	26.99	1.25	0.0891	0.429	no	up	11.3	22.13	0.96	0.196	0.764	no	up	11.3	61.97	2.44	0.000456	0.00357	yes	up	hypothetical protein EURHEDRAFT_443454, partial [Aspergillus ruber CBS 135680]	_	_	_
g2413	26.31	104.77	1.99	0.00177	0.0186	yes	up	85.32	143.3	0.75	0.336	0.791	no	up	85.32	56.65	-0.59	0.303	0.905	no	down	85.32	115.11	0.43	0.522	0.724	no	up	_	_	_	_
g3	1.77	7.32	1.99	0.00204	0.0208	yes	up	3.84	1.62	-1.2	0.0675	0.369	no	down	3.84	10.38	1.41	0.0522	0.364	no	up	3.84	14.22	1.86	0.00696	0.0345	yes	up	mitogen activated protein kinase [Aspergillus ruber CBS 135680]	_	Mitogen-activated protein kinase mpkC (MAP kinase C)(EC 2.7.11.24); Mitogen-activated protei [...]	P38
g1431	15.69	62.23	1.98	0.00159	0.017	yes	up	24.24	33.81	0.48	0.575	0.913	no	up	24.24	68.86	1.5	0.0358	0.285	no	up	24.24	94.15	1.95	0.00421	0.0229	yes	up	hypothetical protein EURHEDRAFT_377850 [Aspergillus ruber CBS 135680]	_	Putative uncharacterized protein	_
g3339	4.64	18.6	1.98	0.00181	0.0188	yes	up	1.93	6.86	1.78	0.0176	0.156	no	up	1.93	4.41	1.15	0.131	0.633	no	up	1.93	9.75	2.28	0.00149	0.00968	yes	up	L-asparaginase [Aspergillus ruber CBS 135680]	_	Pc20g04710	E3.5.1.1, ansA, ansB
g4087	18.73	73.85	1.97	0.00158	0.017	yes	up	5.74	35.27	2.6	0.000343	0.00827	yes	up	5.74	17.01	1.55	0.032	0.264	no	up	5.74	54.99	3.24	6.39e-06	8.26e-05	yes	up	Nop53-domain-containing protein [Aspergillus ruber CBS 135680]	_	Putative uncharacterized protein	NOP53, GLTSCR2
g4850	29.27	113.12	1.95	0.00173	0.0184	yes	up	17.76	62.53	1.81	0.0114	0.114	no	up	17.76	22.27	0.32	0.732	1	no	up	17.76	93.63	2.39	0.00053	0.00405	yes	up	NGP1NT-domain-containing protein [Aspergillus ruber CBS 135680]	_	Afu4g08930 (Alt. Locus), nucleolar GTPase, putative, similar to nucleolar GTPase (SP:Q13823) [...]	NUG2, GNL2
g7683	259.83	995	1.94	0.00181	0.0188	yes	up	174.21	249.44	0.52	0.532	0.897	no	up	174.21	439.47	1.33	0.0623	0.408	no	up	174.21	1176.42	2.75	8.09e-05	0.000786	yes	up	adenosylhomocysteinase [Aspergillus ruber CBS 135680]	_	Adenosylhomocysteinase (EC 3.3.1.1)	E3.3.1.1, ahcY
g6840	5013.37	19175.6	1.94	0.00182	0.0189	yes	up	3308.95	7286.4	1.14	0.119	0.494	no	up	3308.95	6048.14	0.87	0.24	0.839	no	up	3308.95	13180.8	1.99	0.00338	0.019	yes	up	hypothetical protein ANI_1_468154 [Aspergillus niger CBS 513.88]	_	_	RP-L41e, RPL41
g3410	213.15	808.52	1.92	0.00193	0.0198	yes	up	77.84	144.03	0.89	0.237	0.693	no	up	77.84	502.56	2.69	0.000184	0.00436	yes	up	77.84	551.33	2.82	5.66e-05	0.000573	yes	up	glycerol 3-phosphate dehydrogenase [Aspergillus ruber CBS 135680]	_	Afu1g02150 (Alt. Locus), glycerol 3-phosphate dehydrogenase (GfdA), putative, similar to gly [...]	GPD1
g2087	59.35	225.27	1.92	0.00194	0.0199	yes	up	28.06	11.33	-1.3	0.0355	0.251	no	down	28.06	117.34	2.06	0.00379	0.0517	no	up	28.06	231.26	3.04	1.76e-05	0.000207	yes	up	hypothetical protein EURHEDRAFT_452070 [Aspergillus ruber CBS 135680]	_	Afu5g02860 (Alt. Locus), integral membrane protein, putative	_
g6908	16.31	61.95	1.92	0.00205	0.0208	yes	up	54.88	36.37	-0.59	0.287	0.751	no	down	54.88	3.94	-3.77	1.59e-07	1.13e-05	yes	down	54.88	34.18	-0.68	0.295	0.518	no	down	conserved hypothetical protein [Aspergillus terreus NIH2624]	_	_	_
g5382	8	30.62	1.92	0.00227	0.0226	yes	up	27.3	19.36	-0.49	0.368	0.812	no	down	27.3	5.76	-2.23	0.000859	0.0153	yes	down	27.3	29.35	0.1	0.889	0.951	no	up	hypothetical protein EURHEDRAFT_380367 [Aspergillus ruber CBS 135680]	_	_	_
g8290	0.08	0.58	1.92	0.00586	0.0474	yes	up	0.18	0.31	0	1	1	no	no change	0.18	0.18	0	1	1	no	no change	0.18	0.76	1.62	0.0235	0.0896	no	up	Pc21g03650 [Penicillium rubens Wisconsin 54-1255]	_	_	_
g4625	37.41	141.33	1.91	0.00211	0.0212	yes	up	11.37	20.53	0.85	0.275	0.737	no	up	11.37	51.22	2.16	0.00284	0.0414	yes	up	11.37	113.37	3.31	4.82e-06	6.47e-05	yes	up	hypothetical protein EURHEDRAFT_375820 [Aspergillus ruber CBS 135680]	_	Putative uncharacterized protein	_
g1079	12.45	47.11	1.91	0.00219	0.0219	yes	up	6.02	11.89	0.97	0.201	0.648	no	up	6.02	9.41	0.64	0.425	0.971	no	up	6.02	29.76	2.29	0.00103	0.0071	yes	up	deoxyribose-phosphate aldolase [Aspergillus ruber CBS 135680]	_	Contig An11c0330, complete genome	K09142
g7452	1.83	7.13	1.91	0.00294	0.0277	yes	up	0.62	2.59	1.9	0.0165	0.149	no	up	0.62	2.48	1.84	0.022	0.201	no	up	0.62	10.13	3.83	6.4e-07	1.07e-05	yes	up	NADH:flavin oxidoreductase/NADH oxidase family protein [Aspergillus ruber CBS 135680]	_	Afu2g04060 (Alt. Locus), NADH:flavin oxidoreductase/NADH oxidase family protein	E1.6.99.1
g715	2.3	8.83	1.9	0.00342	0.0314	yes	up	3.46	14.06	1.99	0.00706	0.0797	no	up	3.46	5.5	0.65	0.432	0.974	no	up	3.46	2.08	-0.71	0.338	0.56	no	down	actin [Entamoeba histolytica actin, putative [Entamoeba histolytica HM-1:IMSS]	_	_	_
g530	18.11	67.19	1.89	0.00227	0.0226	yes	up	14.87	25.57	0.78	0.307	0.767	no	up	14.87	19.13	0.36	0.687	1	no	up	14.87	64.3	2.1	0.00202	0.0124	yes	up	putative pre-rRNA processing protein Rrp12 [Aspergillus ruber CBS 135680]	_	Pre-rRNA processing protein Rrp12, putative	RRP12
g2292	69.77	258.5	1.89	0.00232	0.0229	yes	up	26.31	152.49	2.53	0.000462	0.0104	yes	up	26.31	54.44	1.05	0.154	0.678	no	up	26.31	145.13	2.46	0.000405	0.00321	yes	up	hypothetical protein EURHEDRAFT_410341 [Aspergillus ruber CBS 135680]	_	_	_
g6682	5.72	21.43	1.89	0.00234	0.0231	yes	up	5.33	6.85	0.36	0.71	0.951	no	up	5.33	8.02	0.58	0.467	0.981	no	up	5.33	30.74	2.51	0.000304	0.00251	yes	up	glycoside hydrolase, partial [Aspergillus ruber CBS 135680]	_	Predicted protein	E3.2.1.58
g6852	348.43	1286.07	1.88	0.00231	0.0229	yes	up	203.3	316.16	0.64	0.421	0.842	no	up	203.3	698.55	1.78	0.0122	0.128	no	up	203.3	1380	2.76	7.8e-05	0.000761	yes	up	putative adenosine kinase [Aspergillus ruber CBS 135680]	_	Adenosine kinase, putative	E2.7.1.20, ADK
g3854	15.73	57.97	1.88	0.0024	0.0235	yes	up	13.01	26.09	1	0.177	0.614	no	up	13.01	14.95	0.2	0.879	1	no	up	13.01	57.02	2.12	0.00188	0.0118	yes	up	putative rRNA maturation protein [Aspergillus ruber CBS 135680]	_	rRNA maturation protein (Nop14), putative	NOP14, UTP2
g4069	13.1	48.59	1.88	0.00269	0.026	yes	up	4.81	3.96	-0.27	0.618	0.924	no	down	4.81	36.08	2.88	0.000111	0.00288	yes	up	4.81	37.96	2.95	4.75e-05	0.000491	yes	up	hypothetical protein AN2922.2 [Aspergillus nidulans FGSC A4]	_	_	_
g283	10.99	40.33	1.87	0.00242	0.0236	yes	up	15.95	52.88	1.72	0.0157	0.144	no	up	15.95	10.39	-0.61	0.276	0.877	no	down	15.95	13.3	-0.26	0.68	0.83	no	down	putative alpha-1,3-glucan synthase [Aspergillus ruber CBS 135680]	_	Alpha-1,3-glucan synthase, putative	E2.4.1.183
g124	76.02	278.73	1.87	0.00242	0.0236	yes	up	25.64	46.01	0.84	0.266	0.726	no	up	25.64	31.39	0.29	0.77	1	no	up	25.64	78.72	1.61	0.0165	0.0685	no	up	hypothetical protein EURHEDRAFT_293538 [Aspergillus ruber CBS 135680]	_	_	_
g6321	30.68	112.49	1.87	0.00245	0.0239	yes	up	13.74	56.42	2.03	0.0045	0.0579	no	up	13.74	25.89	0.91	0.218	0.801	no	up	13.74	92.48	2.74	8.82e-05	0.000845	yes	up	NOL1/NOP2/sun family putative RNA met [Aspergillus ruber CBS 135680]	_	Contig An16c0060, complete genome	NOP2
g8099	7.38	27.32	1.87	0.00252	0.0245	yes	up	3.96	20.7	2.36	0.00105	0.02	yes	up	3.96	11.38	1.5	0.0368	0.288	no	up	3.96	21.53	2.41	0.000489	0.00378	yes	up	hypothetical protein EURHEDRAFT_408892 [Aspergillus ruber CBS 135680]	_	Predicted protein	_
g3467	11.19	41.1	1.87	0.00255	0.0247	yes	up	9.91	24.75	1.31	0.0701	0.376	no	up	9.91	15.42	0.63	0.416	0.969	no	up	9.91	56.39	2.5	0.000316	0.00259	yes	up	hypothetical protein EURHEDRAFT_515796 [Aspergillus ruber CBS 135680]	_	rRNA processing protein Nop9, putative	NOP9
g5826	0.67	2.69	1.86	0.00401	0.0354	yes	up	2.51	2.04	-0.29	0.579	0.913	no	down	2.51	9.39	1.86	0.00973	0.108	no	up	2.51	7.37	1.52	0.0262	0.0969	no	up	MFS transporter [Aspergillus ruber CBS 135680]	_	MFS transporter, putative	_
g281	0.35	1.52	1.85	0.00486	0.0411	yes	up	0.38	0.37	-0.03	1	1	no	down	0.38	1.32	1.56	0.0405	0.308	no	up	0.38	2.6	2.49	0.000506	0.00389	yes	up	FAD/NAD(P)-binding domain-containing protein [Aspergillus ruber CBS 135680]	_	Afu3g15050 (Alt. Locus), flavin-binding monooxygenase, putative	_
g2045	26.89	96.73	1.84	0.00278	0.0267	yes	up	17.23	40.64	1.23	0.0901	0.433	no	up	17.23	24.11	0.48	0.559	1	no	up	17.23	80.27	2.21	0.00124	0.0083	yes	up	Sas10/Utp3 family protein [Aspergillus ruber CBS 135680]	_	Predicted protein	UTP3, SAS10
g2732	23.97	85.99	1.84	0.00293	0.0277	yes	up	13.75	42.01	1.6	0.0259	0.204	no	up	13.75	23.5	0.77	0.311	0.91	no	up	13.75	67.87	2.3	0.000888	0.00629	yes	up	ribosome biogenesis protein Ssf2 [Aspergillus oryzae RIB40]	_	RNA-binding protein required for 60S ribosomal subunit biogenesis	SSF1_2
g915	0.43	1.8	1.84	0.0287	0.154	no	up	0.76	0.54	0	1	1	no	no change	0.76	1.88	1.2	0.172	0.719	no	up	0.76	0.57	0	1	1	no	no change	hypothetical protein EPUS_08136 [Endocarpon pusillum Z07020]	_	_	_
g3409	32.35	115.09	1.83	0.00323	0.0299	yes	up	24.79	47.17	0.93	0.221	0.675	no	up	24.79	59.47	1.26	0.0834	0.489	no	up	24.79	65.88	1.41	0.0376	0.127	no	up	hypothetical protein ASPNIDRAFT_127223 [Aspergillus niger ATCC 1015]	_	Putative uncharacterized protein	clpX, CLPX
g5002	2.91	10.58	1.83	0.00447	0.0384	yes	up	6	6.12	0.03	0.926	0.994	no	up	6	3.15	-0.91	0.16	0.691	no	down	6	8.85	0.55	0.428	0.647	no	up	hypothetical protein TRIATDRAFT_297191 [Trichoderma atroviride IMI 206040]	_	annotation not available	_
g3092	452.18	1594.65	1.82	0.0031	0.0291	yes	up	344.11	786.5	1.19	0.101	0.458	no	up	344.11	359.52	0.06	0.957	1	no	up	344.11	911.45	1.41	0.036	0.123	no	up	L30e-like protein [Aspergillus ruber CBS 135680]	_	40S ribosomal protein S12	RP-S12e, RPS12
g2949	32.08	113.43	1.82	0.00312	0.0291	yes	up	69.25	57.77	-0.26	0.573	0.913	no	down	69.25	58.92	-0.23	0.614	1	no	down	69.25	217.05	1.65	0.0145	0.062	no	up	phosphatidate cytidylyltransferase [Aspergillus ruber CBS 135680]	_	Phosphatidate cytidylyltransferase (EC 2.7.7.41)	E2.7.7.41, CDS1, CDS2, cdsA
g602	14.52	51.42	1.82	0.00318	0.0296	yes	up	35.02	29.28	-0.26	0.578	0.913	no	down	35.02	14.79	-1.24	0.0453	0.332	no	down	35.02	68.69	0.97	0.145	0.328	no	up	hypothetical protein EURHEDRAFT_402397 [Aspergillus ruber CBS 135680]	_	Permeases	pbuG
g4430	17.09	60.76	1.82	0.00319	0.0296	yes	up	11.23	26.03	1.21	0.1	0.456	no	up	11.23	18.75	0.73	0.341	0.93	no	up	11.23	52.57	2.22	0.0013	0.00864	yes	up	TPR domain protein [Aspergillus ruber CBS 135680]	_	Predicted protein	_
g6387	14.03	49.46	1.81	0.00333	0.0307	yes	up	5.75	26.73	2.2	0.00226	0.0354	yes	up	5.75	14.54	1.32	0.0668	0.428	no	up	5.75	45.47	2.96	2.93e-05	0.000323	yes	up	N-terminal nucleophile aminohydrolase [Aspergillus ruber CBS 135680]	_	_	_
g2816	5.61	19.95	1.81	0.0034	0.0312	yes	up	4.71	9.96	1.06	0.152	0.567	no	up	4.71	8.11	0.77	0.313	0.91	no	up	4.71	22.1	2.21	0.0014	0.00915	yes	up	hypothetical protein EURHEDRAFT_407436 [Aspergillus ruber CBS 135680]	_	Pc12g06940	_
g3097	7.04	24.89	1.81	0.00353	0.0321	yes	up	15.02	21.29	0.5	0.551	0.903	no	up	15.02	11.6	-0.37	0.48	0.987	no	down	15.02	51.83	1.78	0.00858	0.0411	yes	up	UAA transporter [Aspergillus ruber CBS 135680]	_	UDP-Glc/Gal endoplasmic reticulum nucleotide sugar transporter	SLC35B1
g700	9.96	34.94	1.8	0.00364	0.0328	yes	up	12.46	15.26	0.29	0.784	0.974	no	up	12.46	13.89	0.16	0.936	1	no	up	12.46	42.86	1.77	0.00903	0.0428	yes	up	putative calcineurin-like phosphoesterase [Aspergillus ruber CBS 135680]	_	Serine/threonine protein phosphatase (EC 3.1.3.16)	PPG1
g7568	12.75	44.4	1.79	0.00355	0.0323	yes	up	4.92	11.05	1.15	0.118	0.492	no	up	4.92	14.66	1.56	0.03	0.254	no	up	4.92	54.46	3.44	1.91e-06	2.82e-05	yes	up	amino acid transporter [Aspergillus ruber CBS 135680]	_	Amino acid transporters	_
g298	19.34	67.18	1.79	0.00358	0.0325	yes	up	7.41	33.76	2.17	0.00254	0.0384	yes	up	7.41	19.77	1.4	0.0512	0.361	no	up	7.41	49.95	2.74	9.78e-05	0.000927	yes	up	hypothetical protein EURHEDRAFT_495228 [Aspergillus ruber CBS 135680]	_	Predicted RNA methylase involved in rRNA processing	RRP8
g6087	1111.77	3824.61	1.78	0.00364	0.0328	yes	up	1454.41	2136.37	0.55	0.496	0.881	no	up	1454.41	1467.45	0.01	0.896	1	no	up	1454.41	3616.89	1.31	0.0493	0.154	no	up	ribosomal protein S17e [Aspergillus ruber CBS 135680]	_	40S ribosomal protein S17, putative	RP-S17e, RPS17
g7651	1665.25	5714.68	1.78	0.00369	0.0332	yes	up	2017.29	2862.6	0.5	0.545	0.901	no	up	2017.29	2364.53	0.23	0.842	1	no	up	2017.29	4787.23	1.25	0.0619	0.182	no	up	60S ribosomal protein L35 [Aspergillus ruber CBS 135680]	_	60S ribosomal protein L35	RP-L35e, RPL35
g172	24.65	84.69	1.78	0.00381	0.0341	yes	up	11.25	28.96	1.36	0.0615	0.35	no	up	11.25	19.13	0.76	0.317	0.913	no	up	11.25	68.49	2.6	0.000198	0.00172	yes	up	small nucleolar ribonucleo protein complex subunit Utp15 [Aspergillus ruber CBS 135680]	_	Small nucleolar ribonucleoprotein complex subunit Utp15, putative	UTP15
g4885	43.14	147.92	1.78	0.00382	0.0341	yes	up	42.09	82.51	0.97	0.192	0.637	no	up	42.09	51.68	0.3	0.765	1	no	up	42.09	123.15	1.55	0.0216	0.0842	no	up	putative ribosomal protein S15 [Aspergillus ruber CBS 135680]	_	30S ribosomal protein S15	_
g7156	30.67	104.63	1.77	0.00409	0.0358	yes	up	9.06	14.15	0.64	0.433	0.85	no	up	9.06	26.36	1.53	0.0346	0.279	no	up	9.06	25.42	1.48	0.0307	0.109	no	up	hypothetical protein [Penicillium rubens Wisconsin 54-1255]	_	_	_
g8143	3.58	12.46	1.77	0.00438	0.0378	yes	up	1.92	4.73	1.26	0.0929	0.439	no	up	1.92	1.8	-0.09	0.823	1	no	down	1.92	7.14	1.84	0.00825	0.0396	yes	up	amino acid transporter [Aspergillus ruber CBS 135680]	_	Amino acid transporter	_
g5702	13.04	44.5	1.76	0.00403	0.0355	yes	up	8.4	23.84	1.49	0.0379	0.262	no	up	8.4	12.37	0.55	0.488	0.988	no	up	8.4	45.72	2.43	0.000445	0.00349	yes	up	nuclear export protein Noc3 [Aspergillus ruber CBS 135680]	_	Protein involved in the nuclear export of pre-ribosomes	NOC3
g6041	13.87	47.38	1.76	0.00445	0.0383	yes	up	8.8	21.05	1.25	0.0929	0.439	no	up	8.8	19.12	1.11	0.137	0.648	no	up	8.8	35.92	2.02	0.00371	0.0206	yes	up	hypothetical protein EURHEDRAFT_404374 [Aspergillus ruber CBS 135680]	_	Putative uncharacterized protein	RRP17, NOL12
g3891	8.26	28.2	1.76	0.00453	0.0388	yes	up	11.2	15.12	0.43	0.632	0.931	no	up	11.2	17.96	0.68	0.388	0.961	no	up	11.2	43.51	1.95	0.00448	0.0241	yes	up	protein serine/threonine phosphatase 2C [Aspergillus ruber CBS 135680]	_	Putative uncharacterized protein	PTC7, PPTC7
g7970	0.42	1.66	1.76	0.0202	0.119	no	up	1.4	1.61	0.19	0.946	0.997	no	up	1.4	1.11	-0.31	0.648	1	no	down	1.4	2.02	0.5	0.517	0.719	no	up	alcohol dehydrogenase [Aspergillus ruber CBS 135680]	_	Alcohol dehydrogenase, putative	adhP
g3872	21.01	70.95	1.75	0.00424	0.037	yes	up	8.33	36.56	2.12	0.00311	0.0444	yes	up	8.33	14.81	0.82	0.273	0.874	no	up	8.33	43.03	2.36	0.000657	0.00486	yes	up	nucleolar protein 12 [Aspergillus ruber CBS 135680]	_	Nucleolar protein 12 ; Involved in pre-25S rRNA processing (By similarity)	NOP12
g8341	16.72	56.56	1.75	0.00426	0.0371	yes	up	15.07	35.86	1.25	0.0868	0.422	no	up	15.07	29.19	0.95	0.198	0.767	no	up	15.07	67.07	2.15	0.00173	0.011	yes	up	hypothetical protein EURHEDRAFT_521978 [Aspergillus ruber CBS 135680]	_	_	_
g3358	19.62	66.18	1.75	0.00428	0.0372	yes	up	12.54	32.99	1.39	0.0545	0.328	no	up	12.54	15.05	0.26	0.808	1	no	up	12.54	65.6	2.38	0.000571	0.00431	yes	up	WD40 repeat-like protein [Aspergillus ruber CBS 135680]	_	WD40 repeat-containing protein	PWP1
g850	380.23	1272.64	1.74	0.00432	0.0374	yes	up	354.08	686.16	0.95	0.199	0.646	no	up	354.08	391.03	0.14	0.946	1	no	up	354.08	945.63	1.42	0.0344	0.119	no	up	60S ribosomal protein L35Ae [Aspergillus ruber CBS 135680]	_	60S ribosomal protein L35Ae	RP-L35Ae, RPL35A
g5720	1334.32	4461.57	1.74	0.00436	0.0377	yes	up	1027.79	2030.59	0.98	0.185	0.625	no	up	1027.79	1423.03	0.47	0.571	1	no	up	1027.79	3798.45	1.89	0.00543	0.028	yes	up	ribosomal protein L37ae [Aspergillus ruber CBS 135680]	_	Contig An04c0310, complete genome	RP-L37Ae, RPL37A
g6839	19.06	63.93	1.74	0.00449	0.0386	yes	up	14.11	26.64	0.91	0.225	0.682	no	up	14.11	16.35	0.21	0.866	1	no	up	14.11	62.1	2.13	0.00188	0.0118	yes	up	hypothetical protein EURHEDRAFT_504076 [Aspergillus ruber CBS 135680]	_	Putative uncharacterized protein	RPA49, POLR1E
g1037	92.4	307.41	1.73	0.00454	0.0388	yes	up	140.43	68.35	-1.04	0.0838	0.412	no	down	140.43	58.08	-1.27	0.0397	0.304	no	down	140.43	330.13	1.23	0.065	0.188	no	up	hypothetical protein EURHEDRAFT_361948 [Aspergillus ruber CBS 135680]	_	_	_
g8208	12.05	40.13	1.73	0.00489	0.0412	yes	up	13.52	25.03	0.88	0.241	0.698	no	up	13.52	20.15	0.57	0.473	0.984	no	up	13.52	41.12	1.6	0.0182	0.0737	no	up	FAD/NAD(P)-binding domain-containing protein [Aspergillus ruber CBS 135680]	_	_	_
g3125	27.18	90.54	1.73	0.00548	0.0449	yes	up	16.35	63.77	1.96	0.0082	0.0892	no	up	16.35	40.05	1.29	0.0878	0.502	no	up	16.35	89.12	2.44	0.000609	0.00456	yes	up	hypothetical protein EURHEDRAFT_423898, partial [Aspergillus ruber CBS 135680]	_	Putative uncharacterized protein	_
g5320	1	3.54	1.73	0.00735	0.0561	no	up	1.69	2.83	0.71	0.39	0.826	no	up	1.69	18.5	3.38	5.77e-06	0.000241	yes	up	1.69	5.24	1.58	0.0242	0.0915	no	up	bacterial luciferase-like protein [Aspergillus ruber CBS 135680]	_	Pc22g21090	_
g3643	8.17	27.21	1.72	0.00473	0.0402	yes	up	4.98	13.59	1.43	0.0468	0.298	no	up	4.98	10.4	1.05	0.15	0.671	no	up	4.98	27.49	2.44	0.000411	0.00324	yes	up	hypothetical protein EURHEDRAFT_375102 [Aspergillus ruber CBS 135680]	_	MYB DNA-binding domain protein	_
g7768	6.52	21.77	1.72	0.00484	0.0409	yes	up	8.42	5.39	-0.63	0.266	0.727	no	down	8.42	6.15	-0.45	0.411	0.967	no	down	8.42	9.37	0.15	0.83	0.921	no	up	amidase signature enzyme [Aspergillus ruber CBS 135680]	_	_	_
g4692	2.16	7.37	1.72	0.00669	0.0524	no	up	3.55	4.98	0.48	0.599	0.918	no	up	3.55	3.25	-0.12	0.782	1	no	down	3.55	6.39	0.83	0.236	0.45	no	up	hypothetical protein EURHEDRAFT_253026 [Aspergillus ruber CBS 135680]	_	C2H2 finger domain protein, putative	_
g3428	2.16	7.36	1.72	0.00937	0.0669	no	up	2.87	2.35	-0.28	0.643	0.933	no	down	2.87	2.5	-0.19	0.704	1	no	down	2.87	11.44	1.96	0.00669	0.0333	yes	up	hypothetical protein EURHEDRAFT_387756 [Aspergillus ruber CBS 135680]	_	_	_
g8097	65.85	216.21	1.71	0.00493	0.0415	yes	up	38.72	63.35	0.71	0.362	0.807	no	up	38.72	54.61	0.5	0.546	1	no	up	38.72	171.03	2.14	0.00176	0.0111	yes	up	hypothetical protein EURHEDRAFT_374631 [Aspergillus ruber CBS 135680]	_	NAP family protein	_
g7061	14.62	48.21	1.71	0.00514	0.0428	yes	up	6.24	21.15	1.74	0.0159	0.145	no	up	6.24	20.49	1.7	0.0182	0.174	no	up	6.24	65.31	3.37	3.15e-06	4.4e-05	yes	up	mitochondrial carrier [Aspergillus ruber CBS 135680]	_	Putative uncharacterized protein	_
g7631	6.84	22.55	1.71	0.0067	0.0525	no	up	5.45	13.93	1.34	0.076	0.393	no	up	5.45	9.2	0.74	0.349	0.933	no	up	5.45	19.2	1.8	0.0103	0.0473	yes	up	hypothetical protein EURHEDRAFT_514982 [Aspergillus ruber CBS 135680]	_	_	_
g361	16.27	53.23	1.7	0.00509	0.0425	yes	up	10.15	28.02	1.46	0.0426	0.28	no	up	10.15	13.57	0.42	0.629	1	no	up	10.15	46.43	2.18	0.00141	0.00918	yes	up	putative ribosome biogenesis protein [Aspergillus ruber CBS 135680]	_	GTP-binding protein AARP2 involved in 40S ribosome biogenesis	BMS1
g6219	14.52	47.44	1.7	0.00531	0.0439	yes	up	7.79	27.31	1.8	0.0123	0.12	no	up	7.79	18.22	1.22	0.0931	0.522	no	up	7.79	44.27	2.49	0.000336	0.00273	yes	up	Serine/threonine-protein kinase Rio1 [Aspergillus ruber CBS 135680]	_	Remark: sudD of A. nidulans is another suppressor of the bimD6 mutation	RIOK1
g2299	52.35	170.07	1.7	0.00542	0.0446	yes	up	54.58	118.34	1.12	0.129	0.516	no	up	54.58	68.56	0.33	0.727	1	no	up	54.58	115.22	1.08	0.107	0.267	no	up	putative nucleolus protein required for cell viability [Aspergillus ruber CBS 135680]	_	nucleolus protein required for cell viability, putative (AFU_orthologue; AFUA_6G05310)	_
g4626	15.38	50.13	1.7	0.0055	0.0449	yes	up	8.92	26.27	1.55	0.0326	0.238	no	up	8.92	11.4	0.35	0.705	1	no	up	8.92	32.2	1.84	0.00718	0.0354	yes	up	hypothetical protein EURHEDRAFT_513809 [Aspergillus ruber CBS 135680]	_	Afu6g14260 (Alt. Locus), U3 small nucleolar ribonucleoprotein protein Lcp5, putative, simila [...]	NGDN, LCP5
g3367	2.67	8.88	1.7	0.0063	0.0501	no	up	3.51	10.25	1.52	0.037	0.258	no	up	3.51	6.26	0.82	0.284	0.89	no	up	3.51	8.57	1.26	0.0618	0.182	no	up	hypothetical protein EURHEDRAFT_516598 [Aspergillus ruber CBS 135680]	_	Putative uncharacterized protein	_
g8181	2.81	9.35	1.7	0.00764	0.0579	no	up	2.37	3.35	0.48	0.617	0.924	no	up	2.37	5.64	1.22	0.114	0.587	no	up	2.37	2.07	-0.19	0.83	0.922	no	down	hypothetical protein EURHEDRAFT_375298 [Aspergillus ruber CBS 135680]	_	_	_
g4340	1.04	3.61	1.7	0.0106	0.0732	no	up	1.39	2.25	0.66	0.473	0.87	no	up	1.39	0.52	-1.26	0.0817	0.483	no	down	1.39	35.13	4.56	4.32e-09	1.09e-07	yes	up	hypothetical protein EURHEDRAFT_515384 [Aspergillus ruber CBS 135680]	_	_	_
g207	987.63	3197.16	1.69	0.00533	0.0441	yes	up	932.06	1729.73	0.89	0.234	0.691	no	up	932.06	1028.91	0.14	0.946	1	no	up	932.06	2294.03	1.3	0.052	0.161	no	up	ribosomal protein S9 [Aspergillus ruber CBS 135680]	_	Pc22g20980	RP-S16e, RPS16
g7657	23.62	76.65	1.69	0.00535	0.0442	yes	up	9.1	35.95	1.97	0.00583	0.0697	no	up	9.1	15.15	0.73	0.338	0.927	no	up	9.1	54.12	2.56	0.00023	0.00197	yes	up	ARM repeat-containing protein [Aspergillus ruber CBS 135680]	_	Putative uncharacterized protein	PUF6
g3343	21.06	68.16	1.69	0.00544	0.0447	yes	up	12.43	36.59	1.55	0.0305	0.226	no	up	12.43	19.8	0.67	0.386	0.96	no	up	12.43	59.41	2.25	0.00105	0.00721	yes	up	WD domain protein [Aspergillus ruber CBS 135680]	_	WD domain protein	DIP2, UTP12, WDR3
g31	84.08	271.16	1.69	0.0055	0.0449	yes	up	378.56	138.63	-1.45	0.0199	0.169	no	down	378.56	32.13	-3.55	4.78e-07	2.95e-05	yes	down	378.56	55.86	-2.76	7.29e-05	0.000721	yes	down	hypothetical protein EURHEDRAFT_415888 [Aspergillus ruber CBS 135680]	_	_	_
g969	3.15	10.37	1.69	0.00664	0.0523	no	up	1.78	7.42	2	0.00648	0.0755	no	up	1.78	3.61	0.98	0.199	0.769	no	up	1.78	29	3.95	1.28e-07	2.51e-06	yes	up	amino acid transporter [Aspergillus ruber CBS 135680]	_	Amino acid transporter, putative	_
g5195	1.43	4.79	1.68	0.00705	0.0545	no	up	0.74	2.08	1.38	0.0639	0.358	no	up	0.74	3.03	1.9	0.00959	0.107	no	up	0.74	2.62	1.7	0.0133	0.0578	no	up	aminotriazole resistance protein, putative [Metarhizium acridum CQMa 102]	_	_	_
g6623	38.76	123.96	1.67	0.00585	0.0474	yes	up	207.09	37.64	-2.46	0.00021	0.00569	yes	down	207.09	95.93	-1.11	0.0685	0.435	no	down	207.09	46.48	-2.15	0.00152	0.00981	yes	down	PAF acetylhydrolase family protein, partial [Aspergillus ruber CBS 135680]	_	PAF acetylhydrolase family protein	_
g2460	497.73	1584.46	1.67	0.00592	0.0478	yes	up	525.7	805.59	0.62	0.44	0.853	no	up	525.7	537.42	0.03	0.919	1	no	up	525.7	1172.64	1.16	0.0828	0.222	no	up	60S ribosomal protein L30 [Aspergillus terreus NIH2624]	_	60S ribosomal protein L30-2	RP-L30e, RPL30
g5687	17.73	56.54	1.67	0.00597	0.0482	yes	up	21.04	34.86	0.73	0.347	0.798	no	up	21.04	16.51	-0.35	0.497	0.99	no	down	21.04	58.02	1.46	0.0295	0.106	no	up	hypothetical protein EURHEDRAFT_410971 [Aspergillus ruber CBS 135680]	_	Putative uncharacterized protein	_
g431	21.18	67.43	1.67	0.00604	0.0486	yes	up	20.43	38.07	0.89	0.233	0.69	no	up	20.43	25.7	0.33	0.725	1	no	up	20.43	71.75	1.81	0.00758	0.0368	yes	up	putative pre-rRNA processing protein Tsr1 [Aspergillus ruber CBS 135680]	_	Putative uncharacterized protein	TSR1
g1592	120.86	384.29	1.67	0.00626	0.05	no	up	138.26	208.76	0.59	0.464	0.864	no	up	138.26	129.65	-0.09	0.773	1	no	down	138.26	337.98	1.29	0.0555	0.168	no	up	_	_	_	_
g570	741.11	2347.4	1.66	0.00609	0.0489	yes	up	655.89	1316.77	1.01	0.174	0.608	no	up	655.89	619.14	-0.08	0.781	1	no	down	655.89	1665.47	1.34	0.0445	0.144	no	up	putative 60s acidic ribosomal protein P2-a [Aspergillus ruber CBS 135680]	_	Contig An16c0170, complete genome. Precursor	RP-LP2, RPLP2
g1064	9.25	29.49	1.66	0.00627	0.05	no	up	6.09	18.17	1.56	0.0299	0.223	no	up	6.09	26.52	2.1	0.00315	0.0449	yes	up	6.09	55.9	3.18	8.28e-06	0.000103	yes	up	putative C6 transcription factor [Aspergillus ruber CBS 135680]	_	Fungal specific transcription factor, putative	GAL4
g1536	14.41	45.79	1.66	0.00633	0.0502	no	up	7.31	25.29	1.78	0.0135	0.128	no	up	7.31	13.56	0.88	0.239	0.834	no	up	7.31	41.56	2.49	0.000345	0.0028	yes	up	dihydrouridine synthase family protein [Aspergillus ruber CBS 135680]	_	Dihydrouridine synthase family protein, putative	DUS1
g6834	11.31	35.98	1.66	0.00638	0.0505	no	up	7.4	16.13	1.11	0.131	0.519	no	up	7.4	13.76	0.89	0.235	0.83	no	up	7.4	35.4	2.24	0.00115	0.0078	yes	up	hypothetical protein EURHEDRAFT_460161 [Aspergillus ruber CBS 135680]	_	_	_
g6261	22.8	72.41	1.66	0.00644	0.051	no	up	15.18	33.3	1.13	0.128	0.512	no	up	15.18	20.59	0.44	0.612	1	no	up	15.18	35.2	1.21	0.0743	0.207	no	up	putative exoribonuclease [Aspergillus ruber CBS 135680]	_	3'-5' exoribonuclease (Csl4), putative	CSL4, EXOSC1
g1105	4.32	13.86	1.66	0.0069	0.0536	no	up	2.09	4.18	0.97	0.212	0.664	no	up	2.09	2.94	0.47	0.605	1	no	up	2.09	5.47	1.35	0.0522	0.161	no	up	branched-chain amino acid aminotransferase II [Aspergillus ruber CBS 135680]	_	Pc12g12060	E2.6.1.42, ilvE
g4432	6.92	22.11	1.66	0.00746	0.0569	no	up	9.55	11.05	0.21	0.888	0.988	no	up	9.55	13.92	0.54	0.514	0.995	no	up	9.55	24.98	1.38	0.0429	0.139	no	up	hypothetical protein EURHEDRAFT_461641 [Aspergillus ruber CBS 135680]	_	Afu4g12090 (Alt. Locus), DNA repair protein (Rad1), putative	_
g2760	3.58	11.5	1.66	0.00935	0.0669	no	up	5.02	1.33	-1.84	0.0103	0.105	no	down	5.02	15.74	1.63	0.0262	0.229	no	up	5.02	22.94	2.17	0.00205	0.0125	yes	up	haloacid dehalogenase-like hydrolase [Aspergillus ruber CBS 135680]	_	_	E3.8.1.2
g5880	19.27	60.88	1.65	0.00629	0.0501	no	up	31.31	31.13	-0.01	0.858	0.983	no	down	31.31	18.16	-0.78	0.181	0.737	no	down	31.31	58.94	0.91	0.171	0.367	no	up	tRNA pseudouridine synthase D [Aspergillus ruber CBS 135680]	_	Uncharacterized conserved protein	truD, PUS7
g7519	7.56	23.97	1.65	0.00656	0.0518	no	up	7.18	10.93	0.6	0.455	0.861	no	up	7.18	9.57	0.41	0.639	1	no	up	7.18	27.45	1.92	0.00477	0.0254	yes	up	exonuclease [Aspergillus ruber CBS 135680]	_	Exonuclease, putative	REX1, REXO1, RNH70
g2227	35.32	111.35	1.65	0.0066	0.052	no	up	14.48	69.29	2.25	0.00184	0.0304	yes	up	14.48	24.47	0.75	0.329	0.921	no	up	14.48	75.98	2.38	0.000616	0.0046	yes	up	hypothetical protein EURHEDRAFT_534264 [Aspergillus ruber CBS 135680]	_	60S ribosomal subunit assembly/export protein loc1 ; Required for efficient assembly and nuc [...]	LOC1
g2363	420.8	1315.79	1.64	0.0066	0.052	no	up	346.42	709.73	1.03	0.16	0.582	no	up	346.42	451.69	0.38	0.664	1	no	up	346.42	897.99	1.37	0.0402	0.133	no	up	hypothetical protein PDIP_85240 [Penicillium digitatum Pd1]	_	Remark: ribosomal protein L41 of C. utilis is also called 60S ribosomal protein L44	RP-L44e, RPL44
g5159	65.3	204.18	1.64	0.00666	0.0523	no	up	35.77	93.45	1.38	0.0552	0.33	no	up	35.77	59.43	0.73	0.336	0.927	no	up	35.77	119.15	1.73	0.0103	0.0474	yes	up	DEAD-domain-containing protein [Aspergillus ruber CBS 135680]	_	ATP-dependent RNA helicase dbp3 (EC 3.6.1.-); ATP-dependent RNA helicase required for 60S ri [...]	DBP3
g2669	76.41	237.91	1.64	0.0068	0.0531	no	up	46.78	24.32	-0.94	0.113	0.482	no	down	46.78	59.38	0.34	0.709	1	no	up	46.78	495.02	3.4	2.18e-06	3.15e-05	yes	up	hypothetical protein EURHEDRAFT_467236 [Aspergillus ruber CBS 135680]	_	_	_
g243	7.35	23.08	1.64	0.00714	0.055	no	up	3.91	9.5	1.26	0.0862	0.42	no	up	3.91	12.2	1.62	0.0244	0.217	no	up	3.91	48.07	3.59	8.56e-07	1.39e-05	yes	up	sugar transporter [Aspergillus ruber CBS 135680]	_	Contig An02c0080, complete genome	MAL
g7232	1.62	5.25	1.64	0.0202	0.119	no	up	7.88	5.51	-0.51	0.412	0.838	no	down	7.88	12.8	0.69	0.41	0.967	no	up	7.88	36.37	2.19	0.00207	0.0126	yes	up	hypothetical protein EURHEDRAFT_518318 [Aspergillus ruber CBS 135680]	_	Afu3g14200 (Alt. Locus), conserved hypothetical protein	_
g483	3.78	11.95	1.63	0.0063	0.0501	no	up	1.28	5.28	1.96	0.00454	0.0581	no	up	1.28	2.71	1.03	0.141	0.655	no	up	1.28	13.65	3.32	2.29e-06	3.29e-05	yes	up	midasin [Aspergillus ruber CBS 135680]	_	Midasin, putative	MDN1, REA1
g990	79.81	247.27	1.63	0.00701	0.0542	no	up	32.08	164.48	2.35	0.00102	0.0194	yes	up	32.08	41.59	0.37	0.675	1	no	up	32.08	153.82	2.26	0.001	0.00695	yes	up	nucleolin protein Nsr1, putative [Aspergillus flavus NRRL3357]	_	Nucleolin protein Nsr1, putative	NCL, NSR1
g5232	22.77	70.53	1.63	0.00722	0.0555	no	up	47.23	24.96	-0.92	0.121	0.498	no	down	47.23	67.15	0.51	0.534	1	no	up	47.23	84.77	0.84	0.206	0.413	no	up	hypothetical protein EURHEDRAFT_413916 [Aspergillus ruber CBS 135680]	_	_	_
g6371	19.51	60.44	1.63	0.00724	0.0556	no	up	4.21	16.2	1.92	0.0077	0.0848	no	up	4.21	12.61	1.56	0.0306	0.257	no	up	4.21	38.95	3.18	8.87e-06	0.00011	yes	up	hypothetical protein EURHEDRAFT_515796 [Aspergillus ruber CBS 135680]	_	Glutamate decarboxylase, putative	E4.1.1.15, gadB, gadA, GAD
g3270	6.5	20.3	1.63	0.00742	0.0566	no	up	5.54	10.91	0.97	0.196	0.641	no	up	5.54	7.23	0.38	0.676	1	no	up	5.54	24.82	2.14	0.0018	0.0114	yes	up	putative C2H2 transcription factor [Aspergillus ruber CBS 135680]	_	Putative uncharacterized protein	_
g3499	20.18	62.77	1.63	0.00836	0.0616	no	up	20.4	38.72	0.92	0.23	0.685	no	up	20.4	18.63	-0.13	0.747	1	no	down	20.4	47.9	1.23	0.0731	0.204	no	up	HlyIII-domain-containing protein [Aspergillus ruber CBS 135680]	_	Remark: ORF 3'truncated due to end of contig. Fragment	ADIPOR
g116	1376.8	4231.94	1.62	0.00731	0.0559	no	up	1202.78	2314.5	0.94	0.204	0.653	no	up	1202.78	1276.56	0.09	0.985	1	no	up	1202.78	3362.73	1.48	0.0271	0.0998	no	up	40S ribosomal protein S20 [Aspergillus niger CBS 513.88]	_	Remark: a splice site was detected upstream of the START codon	RP-S20e, RPS20
g7046	5.01	15.61	1.62	0.00758	0.0576	no	up	3.33	7.84	1.21	0.0963	0.447	no	up	3.33	6.65	0.98	0.185	0.742	no	up	3.33	18.57	2.44	0.000407	0.00321	yes	up	hypothetical protein EURHEDRAFT_383779 [Aspergillus ruber CBS 135680]	_	_	_
g7929	0.36	1.31	1.62	0.0401	0.192	no	up	0.93	1.19	0.32	0.841	0.982	no	up	0.93	1.31	0.45	0.712	1	no	up	0.93	2.29	1.21	0.118	0.286	no	up	putative C6 transcription factor [Aspergillus ruber CBS 135680]	_	_	_
g5910	16.65	51.13	1.61	0.00751	0.0572	no	up	9.81	26.54	1.43	0.0471	0.299	no	up	9.81	17.53	0.83	0.265	0.865	no	up	9.81	50.4	2.35	0.00064	0.00475	yes	up	CCAAT-box-binding transcription factor [Aspergillus ruber CBS 135680]	_	Putative uncharacterized protein	MAK21, NOC1, CEBPZ
g4887	19.47	59.55	1.61	0.00775	0.0585	no	up	22.83	27.68	0.28	0.799	0.975	no	up	22.83	21.53	-0.08	0.783	1	no	down	22.83	76.13	1.73	0.0103	0.0473	yes	up	ATP-dependent rRNA helicase Spb4 [Aspergillus ruber CBS 135680]	_	ATP-dependent rRNA helicase spb4 (EC 3.6.1.-); ATP-binding RNA helicase involved in the biog [...]	DDX55, SPB4
g2672	7.59	23.4	1.61	0.00782	0.0587	no	up	4.93	12.4	1.31	0.0701	0.376	no	up	4.93	6.96	0.49	0.558	1	no	up	4.93	19.34	1.95	0.00423	0.023	yes	up	hypothetical protein EURHEDRAFT_534368 [Aspergillus ruber CBS 135680]	_	_	_
g6810	19.53	59.83	1.61	0.00784	0.0587	no	up	14.02	39.71	1.5	0.0384	0.263	no	up	14.02	19.67	0.49	0.56	1	no	up	14.02	67.97	2.27	0.00101	0.00697	yes	up	RNA processing factor 1 [Aspergillus clavatus NRRL 1]	_	RNA processing factor 1	RPF1
g6640	0.49	1.7	1.61	0.0119	0.0799	no	up	2.53	1.36	-0.85	0.169	0.597	no	down	2.53	0.38	-2.45	0.000405	0.00835	yes	down	2.53	0.44	-2.28	0.00147	0.00959	yes	down	alcohol oxidase [Aspergillus ruber CBS 135680]	_	GMC oxidoreductase, putative	betA, CHDH
g6773	28.01	85.26	1.6	0.0079	0.059	no	up	22.28	52.07	1.22	0.0932	0.439	no	up	22.28	35.49	0.67	0.384	0.958	no	up	22.28	65.68	1.56	0.0208	0.0818	no	up	U3 small nucleolar ribonucleo protein Mpp10 [Aspergillus ruber CBS 135680]	_	U3 small nucleolar ribonucleoprotein protein Mpp10	MPP10
g662	16.07	48.98	1.6	0.00816	0.0606	no	up	15.5	16.14	0.06	0.946	0.997	no	up	15.5	26.71	0.78	0.302	0.905	no	up	15.5	72.55	2.22	0.00124	0.0083	yes	up	pantoate--beta-alanine ligase [Aspergillus ruber CBS 135680]	_	Panthothenate synthetase	panC
g3426	14.91	45.35	1.6	0.00823	0.061	no	up	13.62	30.26	1.15	0.118	0.493	no	up	13.62	10.62	-0.36	0.494	0.989	no	down	13.62	37.38	1.45	0.0315	0.112	no	up	WD40 repeat-like protein [Aspergillus ruber CBS 135680]	_	WD repeat protein	RSA4, NLE1
g270	8.32	25.49	1.6	0.0102	0.0715	no	up	45.72	16.9	-1.43	0.0241	0.195	no	down	45.72	41.06	-0.15	0.707	1	no	down	45.72	56.2	0.3	0.664	0.821	no	up	Thioesterase/thiol ester dehydrase-isomerase [Aspergillus ruber CBS 135680]	_	Pc15g00630	_
g3005	1.97	6.16	1.6	0.0146	0.0941	no	up	1.85	1.48	-0.3	0.636	0.932	no	down	1.85	1.27	-0.51	0.468	0.981	no	down	1.85	6.25	1.7	0.0184	0.0743	no	up	hypothetical protein EURHEDRAFT_342627 [Aspergillus ruber CBS 135680]	_	_	_
g4300	11.52	34.85	1.59	0.00826	0.0612	no	up	4.8	15.56	1.68	0.0187	0.162	no	up	4.8	8.79	0.86	0.245	0.845	no	up	4.8	23.95	2.3	0.000816	0.00585	yes	up	DNA polymerase V [Aspergillus ruber CBS 135680]	_	Similarity to DNA polymerase V Pol5 -Saccharomyces cerevisiae	POL5, MYBBP1A
g6654	53.63	161.48	1.59	0.00831	0.0614	no	up	41.25	121.45	1.56	0.0299	0.223	no	up	41.25	60.25	0.55	0.495	0.989	no	up	41.25	151.09	1.87	0.00576	0.0294	yes	up	importin beta-4 subunit [Aspergillus ruber CBS 135680]	_	Importin beta-4 subunit, putative	_
g8221	20.04	60.56	1.59	0.00836	0.0616	no	up	14.24	33.11	1.21	0.096	0.446	no	up	14.24	17.08	0.26	0.807	1	no	up	14.24	51.77	1.85	0.00624	0.0314	yes	up	ATP-dependent RNA helicase dbp9 [Aspergillus ruber CBS 135680]	_	ATP-dependent RNA helicase dbp9 (EC 3.6.1.-); ATP-binding RNA helicase involved in the bioge [...]	DDX56, DBP9
g430	10.64	32.31	1.59	0.00837	0.0616	no	up	11.34	21.76	0.93	0.212	0.664	no	up	11.34	9.76	-0.21	0.643	1	no	down	11.34	30.71	1.43	0.0336	0.117	no	up	putative small nucleolar ribonucleo protein complex subunit [Aspergillus ruber CBS 135680]	_	Similarity to hypothetical protein B5O22.250 - Neurospora crassa	UTP7, WDR46
g7593	39.19	117.94	1.59	0.00858	0.0628	no	up	24.81	13.05	-0.92	0.124	0.505	no	down	24.81	78.52	1.66	0.0202	0.188	no	up	24.81	65.13	1.39	0.0392	0.13	no	up	hypothetical protein EURHEDRAFT_388269 [Aspergillus ruber CBS 135680]	_	_	_
g5296	10.59	32.12	1.59	0.0086	0.0629	no	up	4.76	13.21	1.45	0.0454	0.292	no	up	4.76	15	1.64	0.023	0.209	no	up	4.76	19.79	2.03	0.0031	0.0177	yes	up	hypothetical protein EURHEDRAFT_373782 [Aspergillus ruber CBS 135680]	_	Afu4g10310 (Alt. Locus), conserved hypothetical protein	_
g2058	0.56	1.89	1.59	0.015	0.0965	no	up	15.9	1.92	-2.99	1.85e-05	0.000854	yes	down	15.9	0.14	-6.06	1.06e-12	4.41e-10	yes	down	15.9	1.11	-3.72	5.75e-07	9.71e-06	yes	down	hypothetical protein EURHEDRAFT_377432 [Aspergillus ruber CBS 135680]	_	Pc21g14180	_
g1471	14.95	44.9	1.58	0.00871	0.0636	no	up	9.44	23.34	1.3	0.0739	0.387	no	up	9.44	11.82	0.32	0.738	1	no	up	9.44	52.54	2.46	0.000374	0.003	yes	up	WD40 repeat-like protein [Aspergillus ruber CBS 135680]	_	Putative uncharacterized protein	RRP9
g1570	33.14	98.93	1.57	0.00883	0.0641	no	up	127.09	75.07	-0.76	0.188	0.628	no	down	127.09	37.95	-1.74	0.00635	0.0782	no	down	127.09	191.76	0.59	0.373	0.592	no	up	hypothetical protein EURHEDRAFT_408126 [Aspergillus ruber CBS 135680]	_	Afu1g15910 (Alt. Locus), C6 transcription factor RosA-like, putative, similar to repressor o [...]	_
g4115	6.54	19.55	1.57	0.00985	0.0696	no	up	2.15	6.54	1.56	0.0324	0.237	no	up	2.15	11.28	2.34	0.00127	0.0211	yes	up	2.15	16.32	2.87	5.4e-05	0.00055	yes	up	putative MFS multidrug transporter [Aspergillus ruber CBS 135680]	_	MFS transporter, putative	_
g5091	1.32	4.11	1.57	0.011	0.0752	no	up	1.22	1.74	0.48	0.611	0.922	no	up	1.22	0.96	-0.32	0.559	1	no	down	1.22	5.9	2.18	0.00199	0.0123	yes	up	hypothetical protein EURHEDRAFT_466292 [Aspergillus ruber CBS 135680]	_	Similarity: Most blast hits are due to repetetive sequence elements	_
g1689	4.67	14.06	1.57	0.0114	0.0773	no	up	11.8	7.49	-0.65	0.266	0.726	no	down	11.8	13.88	0.23	0.842	1	no	up	11.8	114.01	3.26	5.61e-06	7.4e-05	yes	up	hypothetical protein EURHEDRAFT_399348 [Aspergillus ruber CBS 135680]	_	_	_
g5046	16.57	48.93	1.56	0.00964	0.0685	no	up	9.52	23.62	1.3	0.0726	0.383	no	up	9.52	12.33	0.37	0.684	1	no	up	9.52	37.87	1.98	0.00364	0.0202	yes	up	ribosome biogenesis (Nop4) [Aspergillus fumigatus Af293]	_	Afu4g06250 (Alt. Locus), ribosome biogenesis (Nop4), putative	NOP4, RBM28
g4313	7.67	22.74	1.56	0.0101	0.0708	no	up	10.57	10.92	0.05	0.933	0.996	no	up	10.57	12.73	0.27	0.801	1	no	up	10.57	35.67	1.75	0.0101	0.0466	yes	up	CwfJ domain protein [Aspergillus ruber CBS 135680]	_	CwfJ domain protein	_
g1880	1.12	3.5	1.56	0.0626	0.256	no	up	1.09	2.35	1.04	0.362	0.807	no	up	1.09	0.61	0	1	1	no	no change	1.09	2.6	1.18	0.212	0.421	no	up	rhamnose mutarotase [Aspergillus ruber CBS 135680]	_	DUF718 domain protein	_
g3627	6.49	19.26	1.55	0.00975	0.069	no	up	4.92	10.2	1.04	0.159	0.58	no	up	4.92	4.81	-0.03	0.851	1	no	down	4.92	18.6	1.9	0.00525	0.0273	yes	up	polynucleotide 5'-hydroxyl-kinase grc3 [Aspergillus ruber CBS 135680]	_	Protein grc3 ; Involved in rRNA processing (By similarity)	GRC3, NOL9
g1213	48.4	142.26	1.55	0.0098	0.0693	no	up	39.22	73.42	0.9	0.23	0.685	no	up	39.22	57.1	0.54	0.503	0.991	no	up	39.22	111.92	1.51	0.0248	0.0934	no	up	putative 60S ribosomal protein L20 [Aspergillus ruber CBS 135680]	_	Putative uncharacterized protein	_
g3740	13.2	38.78	1.55	0.0101	0.0708	no	up	10.27	21.34	1.05	0.156	0.573	no	up	10.27	9.92	-0.05	0.832	1	no	down	10.27	36.87	1.83	0.00701	0.0347	yes	up	CBF-domain-containing protein [Aspergillus ruber CBS 135680]	_	Putative uncharacterized protein	NOC4, UTP19
g3014	16.64	48.79	1.55	0.0103	0.0715	no	up	35.42	44.1	0.32	0.755	0.965	no	up	35.42	30.72	-0.2	0.646	1	no	down	35.42	81.62	1.2	0.0725	0.203	no	up	PIG-U-domain-containing protein [Aspergillus ruber CBS 135680]	_	Major facilitator superfamily permease - Cdc91p	PIGU
g6630	17.17	50.47	1.55	0.0104	0.0724	no	up	18.66	36.52	0.96	0.197	0.642	no	up	18.66	26.78	0.52	0.526	1	no	up	18.66	66.4	1.83	0.00732	0.036	yes	up	hypothetical protein EURHEDRAFT_415754 [Aspergillus ruber CBS 135680]	_	_	_
g6787	17.97	52.71	1.55	0.0105	0.0725	no	up	15	24.34	0.69	0.38	0.822	no	up	15	22.59	0.59	0.462	0.981	no	up	15	38.46	1.35	0.0455	0.146	no	up	S-adenosyl-L-methionine-dependent methyltransferase [Aspergillus ruber CBS 135680]	_	methyltransferase, putative (AFU_orthologue; AFUA_6G06380)	BUD23
g4751	4.66	13.79	1.55	0.0141	0.0917	no	up	2.27	27.28	3.53	5.29e-06	0.000327	yes	up	2.27	2.62	0.2	0.897	1	no	up	2.27	2.97	0.37	0.624	0.797	no	up	hypothetical protein EURHEDRAFT_417594 [Aspergillus ruber CBS 135680]	_	_	_
g3825	398.72	1148.79	1.53	0.0107	0.074	no	up	267.86	602.71	1.17	0.108	0.473	no	up	267.86	376.26	0.49	0.55	1	no	up	267.86	748.86	1.48	0.0271	0.0998	no	up	heat shock protein 70 [Aspergillus ruber CBS 135680]	_	Heat shock protein	HSPA1_8
g4801	21.98	63.78	1.53	0.0108	0.074	no	up	23.85	54.39	1.19	0.105	0.466	no	up	23.85	22.58	-0.08	0.792	1	no	down	23.85	78.76	1.72	0.0111	0.0504	no	up	hypothetical protein EURHEDRAFT_410089 [Aspergillus ruber CBS 135680]	_	_	_
g6952	12.74	36.89	1.53	0.0108	0.074	no	up	7.11	19.44	1.44	0.0452	0.292	no	up	7.11	10.3	0.53	0.511	0.994	no	up	7.11	37.08	2.37	0.000589	0.00442	yes	up	DEAD-domain-containing protein [Aspergillus ruber CBS 135680]	_	ATP-dependent RNA helicase dbp10 (EC 3.6.1.-); ATP-binding RNA helicase involved in the biog [...]	DDX54, DBP10
g1237	53.78	155.14	1.53	0.0108	0.0743	no	up	74.01	81.61	0.14	0.962	0.999	no	up	74.01	101.08	0.45	0.593	1	no	up	74.01	706.46	3.25	5.16e-06	6.91e-05	yes	up	hypothetical protein NFIA_115220 [Neosartorya fischeri NRRL 181]	_	Putative uncharacterized protein	_
g5654	5.1	14.95	1.53	0.0114	0.0773	no	up	3.19	10.03	1.62	0.0259	0.205	no	up	3.19	8.83	1.44	0.0472	0.341	no	up	3.19	40.87	3.64	6.53e-07	1.09e-05	yes	up	hypothetical protein EURHEDRAFT_376354 [Aspergillus ruber CBS 135680]	_	Contig An11c0030, complete genome	_
g1760	27.34	78.76	1.52	0.0108	0.0743	no	up	11.58	39.88	1.78	0.0127	0.123	no	up	11.58	17.92	0.63	0.42	0.969	no	up	11.58	65.57	2.49	0.000308	0.00254	yes	up	putative DNA-directed RNA polymerase I subunit [Aspergillus ruber CBS 135680]	_	DNA-directed RNA polymerase (EC 2.7.7.6)	RPA1, POLR1A
g1554	9.73	28.08	1.52	0.0113	0.077	no	up	5.96	23.79	1.98	0.00572	0.0687	no	up	5.96	13	1.11	0.127	0.623	no	up	5.96	23.86	1.98	0.0036	0.02	yes	up	P-loop containing nucleoside triphosphate hydrolase protein [Aspergillus ruber CBS 135680]	_	ATP-dependent RNA helicase rok1 (EC 3.6.1.-); ATP-dependent RNA helicase involved in 40S rib [...]	DDX52, ROK1
g1113	17.36	49.94	1.52	0.0115	0.0777	no	up	5.7	22.29	1.95	0.00702	0.0796	no	up	5.7	16.67	1.53	0.0348	0.28	no	up	5.7	31.13	2.43	0.0005	0.00385	yes	up	hypothetical protein EURHEDRAFT_411351 [Aspergillus ruber CBS 135680]	_	Exosome-associated protein, putative	C1D, LRP1
g2073	0.68	2.14	1.52	0.0694	0.276	no	up	0.44	0.71	0	1	1	no	no change	0.44	0.54	0	1	1	no	no change	0.44	0.86	0	1	1	no	no change	hypothetical protein EURHEDRAFT_537038 [Aspergillus ruber CBS 135680]	_	_	_
g6598	8.52	24.44	1.51	0.0114	0.0773	no	up	7.48	14.11	0.91	0.223	0.679	no	up	7.48	8.95	0.26	0.808	1	no	up	7.48	22.61	1.58	0.0182	0.0739	no	up	hypothetical protein EURHEDRAFT_503993 [Aspergillus ruber CBS 135680]	_	_	_
g3013	43.98	125.67	1.51	0.0114	0.0773	no	up	19.69	64.3	1.7	0.0174	0.155	no	up	19.69	34.32	0.8	0.287	0.893	no	up	19.69	115.93	2.55	0.000236	0.00201	yes	up	hypothetical protein EURHEDRAFT_382757 [Aspergillus ruber CBS 135680]	_	Pescadillo homolog (Nucleolar protein 7 homolog); Component of the NOP7 complex, which is re [...]	PES1, NOP7
g328	39.87	113.87	1.51	0.0115	0.0777	no	up	38.68	59.95	0.63	0.427	0.845	no	up	38.68	46.74	0.27	0.791	1	no	up	38.68	188.4	2.28	0.000897	0.00634	yes	up	putative cytochrome P450 family protein [Aspergillus ruber CBS 135680]	_	Pc22g19240	_
g5098	2.19	6.4	1.51	0.0162	0.102	no	up	3.28	0.73	-2.03	0.00514	0.0639	no	down	3.28	2.84	-0.2	0.68	1	no	down	3.28	9.58	1.52	0.0297	0.107	no	up	hypothetical protein EURHEDRAFT_488236 [Aspergillus ruber CBS 135680]	_	Putative uncharacterized protein	_
g4308	3.18	9.26	1.51	0.028	0.151	no	up	4.31	5.02	0.22	0.942	0.997	no	up	4.31	6.22	0.52	0.614	1	no	up	4.31	11.99	1.45	0.0509	0.158	no	up	hypothetical protein EURHEDRAFT_409098 [Aspergillus ruber CBS 135680]	_	_	_
g3287	19.41	55.21	1.5	0.0118	0.0794	no	up	12	33.73	1.48	0.0388	0.265	no	up	12	16.32	0.44	0.601	1	no	up	12	53.23	2.14	0.00174	0.011	yes	up	DUF699-domain-containing protein [Aspergillus ruber CBS 135680]	_	Afu1g05310 (Alt. Locus), nucleolar ATPase Kre33, putative, similar to essential protein of u [...]	NAT10, KRE33
g1211	13.57	38.63	1.5	0.0119	0.0799	no	up	9.5	25	1.39	0.0539	0.325	no	up	9.5	13.26	0.48	0.565	1	no	up	9.5	44.38	2.21	0.00124	0.00827	yes	up	Nrap protein [Aspergillus ruber CBS 135680]	_	Putative uncharacterized protein	UTP22, NOL6
g4879	42.45	120.27	1.5	0.0121	0.0809	no	up	42.53	57.16	0.43	0.63	0.93	no	up	42.53	81.39	0.93	0.205	0.777	no	up	42.53	142.75	1.74	0.00988	0.046	yes	up	ribose-phosphate pyrophosphokinase [Aspergillus clavatus NRRL 1]	_	Ribose-phosphate pyrophosphokinase	PRPS, prsA
g1427	3.99	11.44	1.5	0.0123	0.082	no	up	2.59	8.53	1.68	0.018	0.158	no	up	2.59	4.8	0.87	0.242	0.842	no	up	2.59	11.31	2.08	0.00213	0.013	yes	up	WD repeat protein [Aspergillus ruber CBS 135680]	_	_	_
g1118	19.17	54.34	1.5	0.0126	0.0838	no	up	11.06	30.77	1.47	0.043	0.281	no	up	11.06	10.78	-0.04	0.848	1	no	down	11.06	45.78	2.04	0.00299	0.0172	yes	up	hypothetical protein EURHEDRAFT_498290 [Aspergillus ruber CBS 135680]	_	Putative uncharacterized protein	CMS1
g8029	5.27	15.08	1.5	0.014	0.0914	no	up	6.48	4.19	-0.62	0.293	0.759	no	down	6.48	24.47	1.9	0.00844	0.0977	no	up	6.48	43.01	2.71	0.00012	0.00111	yes	up	putative alcohol dehydrogenase [Aspergillus ruber CBS 135680]	_	Alcohol dehydrogenase, zinc-containing, putative	_
g2745	1.66	4.87	1.5	0.0151	0.0968	no	up	1.8	4.02	1.12	0.142	0.545	no	up	1.8	2.69	0.55	0.509	0.993	no	up	1.8	6.68	1.84	0.00873	0.0416	yes	up	putative 3-beta hydroxysteroid dehydrogenase/isomerase family protein [Aspergillus ruber CBS 135680]	_	Afu1g06450 (Alt. Locus), 3-beta hydroxysteroid dehydrogenase/isomerase family protein, putat [...]	E1.1.1.-
g3238	23.98	67.61	1.49	0.0124	0.0828	no	up	15.34	33.13	1.11	0.132	0.519	no	up	15.34	21.57	0.49	0.553	1	no	up	15.34	56.02	1.86	0.00605	0.0306	yes	up	multiple RNA-binding domain-containing protein 1 [Aspergillus ruber CBS 135680]	_	Similarity: the presence of RNA binding domains suggests a role in RNA processing	MRD1, RBM19
g1460	1349.4	3787.32	1.49	0.0125	0.0832	no	up	1381.58	1887.95	0.45	0.602	0.918	no	up	1381.58	1332.8	-0.05	0.818	1	no	down	1381.58	3246.26	1.23	0.065	0.188	no	up	hypothetical protein EURHEDRAFT_377814 [Aspergillus ruber CBS 135680]	_	60S ribosomal protein L36	RP-L36e, RPL36
g3356	36.2	101.52	1.49	0.013	0.086	no	up	16.58	42.88	1.37	0.0602	0.346	no	up	16.58	29.18	0.81	0.284	0.89	no	up	16.58	108.88	2.71	0.000113	0.00105	yes	up	hypothetical protein EURHEDRAFT_404057 [Aspergillus ruber CBS 135680]	_	Uncharacterized proteins of PilT N-term./Vapc superfamily	UTP23
g1947	3.55	10.12	1.49	0.0146	0.0941	no	up	0.34	4.21	3.29	2.06e-05	0.000915	yes	up	0.34	6.51	3.91	6.51e-07	3.84e-05	yes	up	0.34	5.81	3.75	8.01e-07	1.31e-05	yes	up	MFS general substrate transporter [Aspergillus ruber CBS 135680]	_	Permeases of the major facilitator superfamily	_
g975	0.32	1.08	1.49	0.0577	0.244	no	up	0.37	0.06	0	1	1	no	no change	0.37	0.31	0	1	1	no	no change	0.37	3.03	2.74	0.000556	0.00422	yes	up	hypothetical protein PDE_07607 [Penicillium oxalicum 114-2]	_	_	_
g3618	51.71	144.47	1.48	0.0133	0.0875	no	up	30.11	73.28	1.28	0.0786	0.4	no	up	30.11	73.17	1.28	0.0765	0.464	no	up	30.11	133.92	2.15	0.00174	0.011	yes	up	Prefoldin [Aspergillus ruber CBS 135680]	_	Prefoldin subunit 6, putative	pfdB, PFDN6
g949	0.9	2.69	1.48	0.027	0.147	no	up	0.41	0.89	0.96	0.362	0.807	no	up	0.41	3.04	2.62	0.00127	0.0211	yes	up	0.41	4.43	3.15	8.62e-05	0.000829	yes	up	3-oxoacyl-reductase [Aspergillus ruber CBS 135680]	_	Catalytic activity: (EC 1.1.1.100)	LRA1
g3841	48.09	133.72	1.47	0.0134	0.0879	no	up	57.6	48.97	-0.23	0.602	0.918	no	down	57.6	48.81	-0.24	0.608	1	no	down	57.6	111.53	0.95	0.153	0.338	no	up	glucose-methanol-choline oxidoreductase [Aspergillus ruber CBS 135680]	_	Catalytic activity: alcohol + acceptor = aldehyde + reduced acceptor. (EC 1.1.99.-)	_
g666	18.01	50.22	1.47	0.0134	0.0879	no	up	22.9	9.62	-1.24	0.043	0.281	no	down	22.9	35.23	0.62	0.428	0.971	no	up	22.9	69.29	1.59	0.0179	0.0732	no	up	MFS general substrate transporter [Aspergillus ruber CBS 135680]	_	Predicted transporter	_
g6948	5.76	16.1	1.47	0.0138	0.0905	no	up	7.64	7.38	-0.05	0.816	0.977	no	down	7.64	11.37	0.57	0.474	0.984	no	up	7.64	12.9	0.75	0.26	0.479	no	up	hypothetical protein EURHEDRAFT_385207 [Aspergillus ruber CBS 135680]	_	C2H2 finger domain protein (Ezf), putative	_
g4796	6.44	18.07	1.47	0.0142	0.0919	no	up	9.43	10.55	0.16	0.939	0.997	no	up	9.43	7.48	-0.33	0.522	0.998	no	down	9.43	24.49	1.37	0.0419	0.137	no	up	hypothetical protein EURHEDRAFT_375651 [Aspergillus ruber CBS 135680]	_	Concentrative Na+-nucleoside cotransporter CNT1/CNT2	TC.CNT
g1888	19.65	54.68	1.47	0.0146	0.0941	no	up	8.46	31.74	1.9	0.00937	0.0983	no	up	8.46	20.8	1.29	0.0804	0.478	no	up	8.46	47.54	2.48	0.000419	0.00329	yes	up	hypothetical protein EURHEDRAFT_380217 [Aspergillus ruber CBS 135680]	_	Putative uncharacterized protein	_
g4318	29.48	81.54	1.46	0.0137	0.0899	no	up	20.32	44.78	1.14	0.119	0.495	no	up	20.32	23.33	0.2	0.879	1	no	up	20.32	74.1	1.86	0.00596	0.0303	yes	up	putative DNA-directed RNA polymerase I subunit beta [Aspergillus ruber CBS 135680]	_	DNA-directed RNA polymerase (EC 2.7.7.6)	RPA2, POLR1B
g2722	629.07	1733.86	1.46	0.0139	0.0908	no	up	488.52	909.14	0.9	0.231	0.687	no	up	488.52	603.86	0.31	0.751	1	no	up	488.52	1315.46	1.43	0.033	0.116	no	up	hypothetical protein AN4222.2 [Aspergillus nidulans FGSC A4]	_	60S ribosomal protein L27e (AFU_orthologue; AFUA_1G06340)	RP-L27e, RPL27
g6329	22.2	61.41	1.46	0.014	0.0914	no	up	16.8	37.64	1.16	0.112	0.482	no	up	16.8	17.69	0.07	0.973	1	no	up	16.8	41.69	1.31	0.0513	0.159	no	up	eukaryotic translation initiation factor 3, gamma subunit [Aspergillus ruber CBS 135680]	_	tRNA (adenine-N(1)-)-methyltransferase non-catalytic subunit trm6 (tRNA(m1A58)-methyltransfe [...]	TRM6, GCD10
g778	45.04	124.05	1.46	0.0141	0.0914	no	up	22.42	63.19	1.49	0.0379	0.262	no	up	22.42	37.95	0.76	0.316	0.913	no	up	22.42	99.05	2.14	0.00175	0.0111	yes	up	putative rRNA methyltransferase Spb1 [Aspergillus ruber CBS 135680]	_	RRNA methyltransferase Spb1, putative	SPB1, FTSJ3
g3925	12.27	33.9	1.46	0.0145	0.0937	no	up	12.03	21.94	0.86	0.255	0.712	no	up	12.03	18.09	0.58	0.462	0.981	no	up	12.03	52.9	2.13	0.00191	0.0119	yes	up	sn-1,2-diacylglycerol cholinephosphotransferase [Aspergillus ruber CBS 135680]	_	sn-1,2-diacylglycerol cholinephosphotransferase	EPT1
g3048	14.7	40.71	1.46	0.0151	0.0966	no	up	11.2	7.99	-0.48	0.392	0.827	no	down	11.2	13.49	0.27	0.815	1	no	up	11.2	30.59	1.44	0.0344	0.119	no	up	conserved hypothetical protein [Aspergillus terreus NIH2624]	_	Putative uncharacterized protein	_
g6901	6.01	16.63	1.45	0.0152	0.0972	no	up	8.29	1.6	-2.3	0.000588	0.0127	yes	down	8.29	9.33	0.17	0.917	1	no	up	8.29	1.4	-2.48	0.000363	0.00292	yes	down	hypothetical protein ATEG_02870 [Aspergillus terreus NIH2624]	_	Putative uncharacterized protein	HXT
g4753	546.2	1483.75	1.44	0.0151	0.0966	no	up	594.16	792.83	0.42	0.639	0.932	no	up	594.16	568.13	-0.06	0.803	1	no	down	594.16	1213	1.03	0.122	0.29	no	up	hypothetical protein EURHEDRAFT_438645, partial [Aspergillus ruber CBS 135680]	_	Putative uncharacterized protein	_
g1073	1592.65	4319.51	1.44	0.0152	0.0972	no	up	1216.02	2204.71	0.86	0.254	0.712	no	up	1216.02	1529.81	0.33	0.722	1	no	up	1216.02	3810.74	1.65	0.0145	0.0617	no	up	Pc20g03120 [Penicillium rubens Wisconsin 54-1255]	_	Pc20g03120	RP-S27e, RPS27
g3794	30.79	83.65	1.44	0.0153	0.0974	no	up	15.77	44.65	1.5	0.0373	0.259	no	up	15.77	26.12	0.72	0.341	0.93	no	up	15.77	66.39	2.07	0.00246	0.0146	yes	up	amino acid permease [Aspergillus ruber CBS 135680]	_	Remark: a splice site was detected upstream of the START codon	YAT
g7795	12.65	34.45	1.44	0.0157	0.0994	no	up	9.93	18.34	0.88	0.244	0.702	no	up	9.93	15.53	0.64	0.414	0.968	no	up	9.93	38.15	1.93	0.00465	0.0248	yes	up	SEN2 subunit of tRNA-splicing endonuclease [Aspergillus ruber CBS 135680]	_	Complex: the S. cerevisiae SEN2 forms a tetrameric enzyme with two active sites	TSEN2
g8292	2.86	7.92	1.44	0.0259	0.142	no	up	1.15	9.71	2.97	0.0002	0.00551	yes	up	1.15	0.88	-0.35	0.598	1	no	down	1.15	0.4	0	1	1	no	no change	hypothetical protein PFICI_10963 [Pestalotiopsis fici W106-1]	_	_	_
g4050	18.12	49.01	1.43	0.0156	0.099	no	up	9.62	27.81	1.52	0.0332	0.241	no	up	9.62	11.66	0.27	0.787	1	no	up	9.62	40.65	2.07	0.00235	0.0141	yes	up	nucleic acid-binding protein [Aspergillus ruber CBS 135680]	_	Function: RRP5 is required for formation of both 18S and 5. 8S rRNA in yeast	RRP5, PDCD11
g1045	712.79	1914.33	1.43	0.0161	0.101	no	up	725.32	1057.52	0.54	0.507	0.886	no	up	725.32	669.6	-0.12	0.744	1	no	down	725.32	1502.78	1.05	0.115	0.278	no	up	40S ribosomal protein S9 [Aspergillus niger CBS 513.88]	_	Complex: S9 is a protein of the cytosolic small ribosomal	RP-S9e, RPS9
g7598	4.69	12.83	1.43	0.0161	0.101	no	up	8	7.08	-0.17	0.676	0.943	no	down	8	8.68	0.12	0.98	1	no	up	8	30.34	1.91	0.00499	0.0263	yes	up	hypothetical protein EURHEDRAFT_505258 [Aspergillus ruber CBS 135680]	_	_	_
g3299	23.24	62.94	1.43	0.0165	0.103	no	up	22.67	41.07	0.85	0.262	0.721	no	up	22.67	33.54	0.56	0.484	0.988	no	up	22.67	55.66	1.29	0.0554	0.168	no	up	adenylate kinase [Aspergillus ruber CBS 135680]	_	Adenylate kinase 2	adk, AK
g7079	4.88	13.3	1.43	0.0169	0.104	no	up	3.03	9.76	1.66	0.0219	0.181	no	up	3.03	5.19	0.76	0.32	0.917	no	up	3.03	10.64	1.78	0.00926	0.0436	yes	up	hypothetical protein EURHEDRAFT_448065 [Aspergillus ruber CBS 135680]	_	Predicted metalloprotease with chaperone activity	KAE1, tsaD, QRI7
g7401	11.48	31.02	1.43	0.0175	0.107	no	up	3.96	5.58	0.48	0.594	0.917	no	up	3.96	11.58	1.52	0.0383	0.296	no	up	3.96	42.3	3.38	3.39e-06	4.69e-05	yes	up	integral membrane protein [Aspergillus ruber CBS 135680]	_	Putative uncharacterized protein	_
g338	3.49	9.56	1.43	0.0189	0.114	no	up	4.84	3.31	-0.53	0.355	0.804	no	down	4.84	4.39	-0.14	0.739	1	no	down	4.84	11.6	1.24	0.0686	0.196	no	up	hypothetical protein EURHEDRAFT_515018 [Aspergillus ruber CBS 135680]	_	Predicted protein	_
g5568	26.51	71.17	1.42	0.0163	0.103	no	up	18.05	39.28	1.12	0.127	0.51	no	up	18.05	18.08	0	0.886	1	no	up	18.05	64.31	1.83	0.00698	0.0346	yes	up	ribosome biogenesis protein erb1 [Aspergillus ruber CBS 135680]	_	Ribosome biogenesis protein ERB1 (Eukaryotic ribosome biogenesis protein 1); Component of th [...]	ERB1, BOP1
g6062	27.68	74.43	1.42	0.0165	0.103	no	up	15.86	43.83	1.46	0.0428	0.281	no	up	15.86	26.01	0.71	0.354	0.936	no	up	15.86	54.03	1.76	0.0093	0.0438	yes	up	ribosomal biogenesis regulatory protein [Aspergillus ruber CBS 135680]	_	Afu7g04430 (Alt. Locus), ribosome biogenesis protein (Rrs1), putative	RRS1
g797	56.79	152.11	1.42	0.0166	0.103	no	up	25.53	95.45	1.9	0.00799	0.0874	no	up	25.53	35.03	0.45	0.587	1	no	up	25.53	107.94	2.08	0.00239	0.0142	yes	up	Ebp2-domain-containing protein [Aspergillus ruber CBS 135680]	_	Nucleolar protein-like/EBNA1-binding protein	EBP2, EBNA1BP2
g7073	1060.66	2831.42	1.42	0.0166	0.104	no	up	1262.81	1804.55	0.51	0.535	0.898	no	up	1262.81	1103.35	-0.19	0.654	1	no	down	1262.81	2460.23	0.96	0.148	0.331	no	up	hypothetical protein EURHEDRAFT_448247 [Aspergillus ruber CBS 135680]	_	40S ribosomal protein S13, putative;	RP-S13e, RPS13
g7899	9.84	26.56	1.42	0.0167	0.104	no	up	9.95	13.45	0.43	0.626	0.93	no	up	9.95	15.15	0.6	0.449	0.975	no	up	9.95	33.47	1.74	0.0103	0.0473	yes	up	putative origin recognition complex subunit 2 [Aspergillus ruber CBS 135680]	_	Origin recognition complex subunit 2, putative	ORC2
g5701	38.45	103.18	1.42	0.0168	0.104	no	up	13.42	55.79	2.05	0.00457	0.0582	no	up	13.42	19.82	0.56	0.496	0.99	no	up	13.42	58.86	2.12	0.00209	0.0127	yes	up	60S ribosome subunit biogenesis protein NIP7 [Aspergillus ruber CBS 135680]	_	Ribosome biogenesis protein NIP7	NIP7
g6369	11.4	30.73	1.42	0.0168	0.104	no	up	14.97	26.87	0.84	0.268	0.728	no	up	14.97	21.35	0.51	0.535	1	no	up	14.97	38.29	1.35	0.0445	0.144	no	up	hypothetical protein EURHEDRAFT_412946 [Aspergillus ruber CBS 135680]	_	_	_
g1047	16.77	45.05	1.42	0.0171	0.105	no	up	12.48	17.17	0.46	0.6	0.918	no	up	12.48	24.01	0.94	0.206	0.779	no	up	12.48	49.46	1.98	0.00388	0.0213	yes	up	putative mitochondrial carrier protein [Aspergillus ruber CBS 135680]	_	Mitochondrial carrier protein (Rim2), putative	SLC25A33_36, RIM2
g6309	5.61	15.2	1.42	0.0171	0.105	no	up	7.3	1.15	-2.57	0.000167	0.00483	yes	down	7.3	27.69	1.91	0.00746	0.0894	no	up	7.3	23.64	1.68	0.0132	0.0574	no	up	MFS general substrate transporter [Aspergillus ruber CBS 135680]	_	Putative uncharacterized protein	_
g5703	0.88	2.52	1.42	0.0176	0.108	no	up	0.52	1.59	1.45	0.0477	0.301	no	up	0.52	0.87	0.65	0.412	0.967	no	up	0.52	1.48	1.35	0.0448	0.145	no	up	hypothetical protein EURHEDRAFT_401543 [Aspergillus ruber CBS 135680]	_	_	_
g3008	3.3	8.97	1.42	0.0178	0.108	no	up	3.41	3.06	-0.15	0.709	0.951	no	down	3.41	5.37	0.64	0.42	0.969	no	up	3.41	12.05	1.79	0.00862	0.0412	yes	up	FAD dependent oxidoreductase [Aspergillus ruber CBS 135680]	_	Pc20g15150	PIPOX
g2876	1687.35	4486.86	1.41	0.017	0.105	no	up	1450.83	2338.14	0.69	0.377	0.82	no	up	1450.83	1631.77	0.17	0.913	1	no	up	1450.83	2917.7	1.01	0.13	0.303	no	up	40S ribosomal protein S3aE [Aspergillus ruber CBS 135680]	_	40S ribosomal protein S3aE	RP-S3Ae, RPS3A
g1346	30.53	81.23	1.41	0.0175	0.107	no	up	17.12	45.13	1.39	0.0542	0.327	no	up	17.12	26.59	0.63	0.42	0.969	no	up	17.12	72.29	2.07	0.00249	0.0147	yes	up	hypothetical protein EURHEDRAFT_412793 [Aspergillus ruber CBS 135680]	_	_	RPA43
g4154	16.35	43.47	1.41	0.0176	0.108	no	up	15.68	19.32	0.3	0.772	0.97	no	up	15.68	25.67	0.71	0.354	0.936	no	up	15.68	49.92	1.66	0.0137	0.059	no	up	putative kelch repeats protein [Aspergillus ruber CBS 135680]	_	Kelch repeats protein, putative	_
g1356	2.83	7.67	1.41	0.0192	0.116	no	up	3.28	4.61	0.48	0.584	0.914	no	up	3.28	6.06	0.87	0.248	0.848	no	up	3.28	9.98	1.58	0.0212	0.0832	no	up	cyclophilin-like protein [Aspergillus ruber CBS 135680]	_	RNA binding protein, putative	PPIL4
g5791	0.66	1.92	1.41	0.0306	0.16	no	up	1.05	0.1	-2.52	0.00281	0.0413	yes	down	1.05	9.11	3	7.3e-05	0.00205	yes	up	1.05	9.33	3.04	3.81e-05	0.000404	yes	up	L-arabinitol 4-dehydrogenase [Aspergillus ruber CBS 135680]	_	Afu1g11020 (Alt. Locus), L-arabinitol 4-dehydrogenase, (1.1.1.14)	SORD, gutB
g5953	59.68	157.63	1.4	0.0179	0.109	no	up	18.43	24	0.38	0.682	0.946	no	up	18.43	84.84	2.2	0.00214	0.0328	yes	up	18.43	84	2.18	0.00149	0.00968	yes	up	2,3-diketo-5-methylthio-1-phosphopentane phosphatase [Aspergillus ruber CBS 135680]	_	2,3-diketo-5-methylthio-1-phosphopentane phosphatase, putative	_
g5570	13.13	34.71	1.4	0.0182	0.111	no	up	12.72	22.5	0.82	0.281	0.744	no	up	12.72	11.89	-0.1	0.773	1	no	down	12.72	29.7	1.22	0.069	0.196	no	up	putative AAA family ATPase/60S ribosome export protein Rix7 [Aspergillus ruber CBS 135680]	_	AAA family ATPase/60S ribosome export protein Rix7, putative	RIX7, NVL
g6504	10.07	26.75	1.4	0.0182	0.111	no	up	4.67	11.45	1.28	0.08	0.403	no	up	4.67	17.44	1.88	0.00851	0.0981	no	up	4.67	36.75	2.95	3.06e-05	0.000335	yes	up	hypothetical protein EURHEDRAFT_448841 [Aspergillus ruber CBS 135680]	_	_	_
g4920	5.99	15.98	1.4	0.0183	0.111	no	up	3.36	7.82	1.19	0.102	0.461	no	up	3.36	7.21	1.08	0.139	0.651	no	up	3.36	30.06	3.12	1.13e-05	0.000137	yes	up	DUF580-domain-containing protein [Aspergillus ruber CBS 135680]	_	GTPase activating protein (Gyp3), putative	_
g7484	5.68	15.2	1.4	0.0195	0.117	no	up	3.9	4.04	0.05	0.959	0.999	no	up	3.9	2.24	-0.77	0.222	0.807	no	down	3.9	32.4	3.02	2.45e-05	0.000276	yes	up	putative integral membrane protein [Aspergillus ruber CBS 135680]	_	Afu2g15440 (Alt. Locus), integral membrane protein, putative	_
g1685	12.09	31.86	1.39	0.0187	0.113	no	up	11.29	16.26	0.52	0.53	0.896	no	up	11.29	12.16	0.11	0.994	1	no	up	11.29	33.09	1.54	0.0218	0.0847	no	up	tRNA-dihydrouridine(47) synthase [NAD(P)(+)]	_	tRNA-dihydrouridine synthase 3 (EC 1.-.-.-); Catalyzes the synthesis of dihydrouridine, a mo [...]	DUS3
g7080	43.78	114.76	1.39	0.0197	0.117	no	up	30.92	55.6	0.84	0.272	0.732	no	up	30.92	72.03	1.22	0.0957	0.53	no	up	30.92	124.58	2.01	0.00356	0.0199	yes	up	hypothetical protein EURHEDRAFT_408969 [Aspergillus ruber CBS 135680]	_	_	_
g6018	2.97	7.96	1.39	0.0201	0.119	no	up	4.17	6.7	0.67	0.397	0.829	no	up	4.17	2.3	-0.83	0.172	0.718	no	down	4.17	9.01	1.09	0.104	0.262	no	up	hypothetical protein EURHEDRAFT_379344 [Aspergillus ruber CBS 135680]	_	Putative uncharacterized protein	_
g5541	8.99	23.79	1.39	0.0203	0.12	no	up	10.03	13.07	0.38	0.69	0.946	no	up	10.03	13.44	0.42	0.64	1	no	up	10.03	18.07	0.84	0.211	0.42	no	up	DUF1763-domain-containing protein [Aspergillus ruber CBS 135680]	_	Predicted protein	_
g4899	15.07	39.41	1.38	0.0194	0.116	no	up	33.26	26.78	-0.31	0.522	0.893	no	down	33.26	17.78	-0.9	0.131	0.633	no	down	33.26	45.79	0.46	0.492	0.7	no	up	hypothetical protein EURHEDRAFT_516220 [Aspergillus ruber CBS 135680]	_	_	_
g4044	154.87	402.24	1.38	0.0194	0.116	no	up	140.32	280.58	1	0.176	0.614	no	up	140.32	227.54	0.7	0.361	0.94	no	up	140.32	673.14	2.26	0.000981	0.00684	yes	up	phosphatidylethanolamine methyltransferase [Aspergillus ruber CBS 135680]	_	Phosphatidylethanolamine methyltransferase Pem1, putative (EC 2.1.1.17)	CHO2
g658	7.51	19.68	1.38	0.0195	0.117	no	up	9.28	10.5	0.18	0.918	0.993	no	up	9.28	13.37	0.52	0.52	0.998	no	up	9.28	38.49	2.04	0.00278	0.0162	yes	up	hypothetical protein EURHEDRAFT_515155 [Aspergillus ruber CBS 135680]	_	Predicted protein	_
g7052	56.79	147.46	1.38	0.0196	0.117	no	up	22.48	91.52	2.02	0.00474	0.0598	no	up	22.48	32.33	0.52	0.519	0.998	no	up	22.48	96.41	2.1	0.00219	0.0133	yes	up	ribosomal protein L1 [Aspergillus ruber CBS 135680]	_	Putative uncharacterized protein	UTP30, RSL1D1
g2852	10.38	27.12	1.38	0.0205	0.121	no	up	4.45	12.95	1.52	0.0372	0.259	no	up	4.45	12.28	1.44	0.0463	0.336	no	up	4.45	25.92	2.52	0.000343	0.00278	yes	up	hypothetical protein EURHEDRAFT_445651 [Aspergillus ruber CBS 135680]	_	Predicted protein	BMT5
g657	25.26	65.65	1.37	0.0197	0.117	no	up	30.8	36.23	0.23	0.85	0.982	no	up	30.8	38.57	0.32	0.732	1	no	up	30.8	73.97	1.26	0.0593	0.176	no	up	family 31 glycosyltransferase [Aspergillus ruber CBS 135680]	_	Predicted protein	_
g307	68.61	177.64	1.37	0.0198	0.118	no	up	48.34	119.59	1.31	0.0712	0.378	no	up	48.34	50.96	0.08	0.973	1	no	up	48.34	126.98	1.39	0.0378	0.127	no	up	nucleolar GTP-binding protein 1 [Aspergillus terreus NIH2624]	_	Nucleolar GTP-binding protein 1	NOG1
g538	15.73	40.89	1.37	0.0204	0.121	no	up	9.94	23.02	1.2	0.101	0.458	no	up	9.94	14.91	0.58	0.47	0.983	no	up	9.94	53.21	2.41	0.00052	0.00398	yes	up	hypothetical protein EURHEDRAFT_375457 [Aspergillus ruber CBS 135680]	_	Putative uncharacterized protein	_
g696	14.55	37.83	1.37	0.0207	0.122	no	up	12.03	21.85	0.86	0.262	0.721	no	up	12.03	13.27	0.14	0.957	1	no	up	12.03	32.52	1.43	0.0351	0.121	no	up	mitochondrial carrier [Aspergillus ruber CBS 135680]	_	Pc12g04160	SLC25A33_36, RIM2
g1121	4.35	11.42	1.37	0.0269	0.146	no	up	18.57	11.69	-0.66	0.258	0.716	no	down	18.57	14.63	-0.34	0.515	0.995	no	down	18.57	13.86	-0.42	0.531	0.73	no	down	hypothetical protein EURHEDRAFT_411358 [Aspergillus ruber CBS 135680]	_	Predicted protein	_
g7110	130.6	336.11	1.36	0.0205	0.121	no	up	86.54	64.65	-0.42	0.42	0.842	no	down	86.54	123.11	0.51	0.532	1	no	up	86.54	431.52	2.32	0.000756	0.00547	yes	up	hypothetical protein EURHEDRAFT_528765 [Aspergillus ruber CBS 135680]	_	Function: UTR2 Precursor (EC 3.2.1.-)	_
g1476	14.23	36.69	1.36	0.0206	0.121	no	up	9.82	22.42	1.18	0.104	0.465	no	up	9.82	10.82	0.14	0.956	1	no	up	9.82	36.3	1.88	0.00568	0.029	yes	up	putative small nucleolar ribonucleo protein complex subunit [Aspergillus ruber CBS 135680]	_	Putative uncharacterized protein	UTP13, TBL3
g1062	2164.04	5537.14	1.36	0.021	0.123	no	up	1476.03	2619.9	0.83	0.274	0.734	no	up	1476.03	1909.81	0.37	0.676	1	no	up	1476.03	4416.97	1.58	0.0187	0.0753	no	up	60S ribosomal protein L37, partial [Aspergillus ruber CBS 135680]	_	Pc20g02980; Binds to the 23S rRNA (By similarity)	RP-L37e, RPL37
g7220	16.13	41.49	1.36	0.0218	0.127	no	up	30.56	40.01	0.39	0.675	0.943	no	up	30.56	30.75	0.01	0.895	1	no	up	30.56	47.57	0.64	0.341	0.564	no	up	putative RNA polymerase II Elongator complex associated protein Kti12 [Aspergillus ruber CBS 135680]	_	_	KTI12
g932	99.14	254.1	1.36	0.0218	0.127	no	up	353.34	224.4	-0.65	0.248	0.707	no	down	353.34	258.46	-0.45	0.404	0.964	no	down	353.34	311.07	-0.18	0.77	0.885	no	down	_	_	_	_
g4197	20.48	52.41	1.35	0.0216	0.126	no	up	17.35	25.81	0.57	0.483	0.875	no	up	17.35	26.49	0.61	0.439	0.975	no	up	17.35	44.13	1.34	0.0452	0.145	no	up	hypothetical protein EURHEDRAFT_523390 [Aspergillus ruber CBS 135680]	_	Putative uncharacterized protein	_
g5203	18.18	46.47	1.35	0.0218	0.127	no	up	9.64	20.59	1.09	0.14	0.541	no	up	9.64	11.02	0.19	0.892	1	no	up	9.64	37.81	1.96	0.00398	0.0218	yes	up	putative small nucleolar ribonucleo protein complex subunit [Aspergillus ruber CBS 135680]	_	Small nucleolar ribonucleoprotein complex subunit, putative	UTP18
g8111	12.07	30.85	1.35	0.0218	0.127	no	up	9.38	22.66	1.26	0.0809	0.406	no	up	9.38	8.97	-0.06	0.81	1	no	down	9.38	30.96	1.71	0.0112	0.0504	no	up	putative small nucleolar ribonucleo protein complex subunit [Aspergillus ruber CBS 135680]	_	Small nucleolar ribonucleoprotein complex subunit (Pwp2), putative	PWP2, UTP1
g5580	13.01	33.23	1.35	0.0221	0.128	no	up	10.65	21.51	1.01	0.173	0.607	no	up	10.65	9.4	-0.18	0.674	1	no	down	10.65	31.52	1.56	0.0206	0.0812	no	up	U3 small nucleolar RNA-associated protein 25 [Aspergillus ruber CBS 135680]	_	Similarity to hypothetical protein 1A9.230 - Neurospora crassa	UTP25, DEF
g5598	23.66	60.29	1.35	0.0221	0.128	no	up	30.96	24.21	-0.35	0.482	0.875	no	down	30.96	29.35	-0.08	0.791	1	no	down	30.96	55.64	0.84	0.206	0.413	no	up	hypothetical protein EURHEDRAFT_415248 [Aspergillus ruber CBS 135680]	_	Similarity to hypothetical protein BAC67939.1 - Streptomyces avermitilis Precursor	_
g851	35.39	90.31	1.35	0.0221	0.128	no	up	22.56	50.42	1.16	0.115	0.486	no	up	22.56	32.09	0.51	0.536	1	no	up	22.56	58.97	1.38	0.0401	0.132	no	up	hypothetical protein EURHEDRAFT_133466 [Aspergillus ruber CBS 135680]	_	_	_
g4971	9.37	23.96	1.35	0.0232	0.133	no	up	12.42	7.11	-0.8	0.179	0.616	no	down	12.42	8.51	-0.54	0.337	0.927	no	down	12.42	11	-0.17	0.786	0.894	no	down	putative lipase/serine esterase [Aspergillus ruber CBS 135680]	_	Lipase/serine esterase, putative	_
g5507	4.66	12.02	1.35	0.0266	0.145	no	up	10.56	6.4	-0.71	0.235	0.691	no	down	10.56	10.01	-0.08	0.81	1	no	down	10.56	7.54	-0.48	0.483	0.692	no	down	hypothetical protein EURHEDRAFT_517549 [Aspergillus ruber CBS 135680]	_	_	_
g6031	1.64	4.34	1.35	0.0471	0.215	no	up	2.05	0.61	-1.6	0.0785	0.4	no	down	2.05	8.44	1.99	0.0126	0.131	no	up	2.05	4.91	1.22	0.12	0.287	no	up	hypothetical protein EURHEDRAFT_516891 [Aspergillus ruber CBS 135680]	_	_	_
g5191	0.99	2.67	1.35	0.0528	0.23	no	up	1.93	2.51	0.36	0.776	0.971	no	up	1.93	0.94	-0.96	0.191	0.755	no	down	1.93	0.94	-0.96	0.272	0.49	no	down	hypothetical protein EURHEDRAFT_516461 [Aspergillus ruber CBS 135680]	_	_	SEC11, sipW
g5923	1025.87	2589.5	1.34	0.0226	0.131	no	up	326.68	915.54	1.49	0.0384	0.263	no	up	326.68	1338.64	2.03	0.0042	0.0563	no	up	326.68	2134.56	2.71	0.000104	0.000981	yes	up	methionine adenosyltransferase [Aspergillus ruber CBS 135680]	_	Pc16g04380; Catalyzes the formation of S-adenosylmethionine from methionine and ATP (By simi [...]	metK
g3208	827.11	2086.95	1.34	0.0227	0.131	no	up	901.57	1191.29	0.4	0.654	0.936	no	up	901.57	825.62	-0.13	0.73	1	no	down	901.57	1817.43	1.01	0.129	0.301	no	up	60S ribosomal protein L15 [Aspergillus ruber CBS 135680]	_	Ribosomal protein L15	RP-L15e, RPL15
g7843	7.03	17.93	1.34	0.0243	0.136	no	up	5.62	11.61	1.03	0.168	0.595	no	up	5.62	6.54	0.22	0.871	1	no	up	5.62	12.49	1.14	0.0926	0.242	no	up	Las1-domain-containing protein [Aspergillus ruber CBS 135680]	_	Putative uncharacterized protein	LAS1
g1089	11.35	28.97	1.34	0.0245	0.137	no	up	6.69	17.81	1.4	0.059	0.343	no	up	6.69	15.84	1.23	0.0985	0.538	no	up	6.69	30.76	2.18	0.00174	0.0111	yes	up	hypothetical protein EURHEDRAFT_411329 [Aspergillus ruber CBS 135680]	_	Putative uncharacterized protein	_
g2126	40.35	101.86	1.33	0.0228	0.131	no	up	26.61	79.64	1.58	0.0275	0.212	no	up	26.61	45.91	0.78	0.296	0.902	no	up	26.61	97.97	1.88	0.0056	0.0287	yes	up	[NU+]	_	Function: the translational elongation factor 3	EF3, TEF3
g6299	273.84	689.34	1.33	0.0231	0.132	no	up	620.76	1534.81	1.31	0.0708	0.377	no	up	620.76	525.07	-0.24	0.604	1	no	down	620.76	236.31	-1.39	0.0353	0.121	no	down	hypothetical protein EURHEDRAFT_461263 [Aspergillus ruber CBS 135680]	_	Putative uncharacterized protein	_
g6717	13.56	34.21	1.33	0.0233	0.133	no	up	8.54	21.76	1.34	0.0637	0.358	no	up	8.54	9.62	0.17	0.915	1	no	up	8.54	24.4	1.5	0.0252	0.0943	no	up	putative ATP dependent RNA helicase [Aspergillus ruber CBS 135680]	_	ATP-dependent RNA helicase mak5 (EC 3.6.1.-); ATP-binding RNA helicase involved in the bioge [...]	DDX24, MAK5
g1805	21.43	54.06	1.33	0.0233	0.133	no	up	73.45	89.4	0.28	0.79	0.975	no	up	73.45	9.08	-3	1.19e-05	0.000452	yes	down	73.45	6.62	-3.45	1.51e-06	2.3e-05	yes	down	cytochrome P450 monooxygenase [Aspergillus ruber CBS 135680]	_	Pc16g12170	_
g1518	53.62	134.84	1.33	0.0234	0.133	no	up	60.75	31.63	-0.94	0.113	0.484	no	down	60.75	133.83	1.14	0.116	0.59	no	up	60.75	212.88	1.81	0.00758	0.0368	yes	up	putative amino acid permease [Aspergillus ruber CBS 135680]	_	Amino acid transporters	_
g5181	19.4	49.07	1.33	0.0235	0.134	no	up	15.1	27.13	0.84	0.269	0.729	no	up	15.1	15.91	0.07	0.979	1	no	up	15.1	39.59	1.38	0.0399	0.132	no	up	dimethyladenosine transferase [Aspergillus ruber CBS 135680]	_	Pc22g08040	DIM1
g5773	14.69	37.07	1.33	0.0236	0.134	no	up	10.12	19.02	0.9	0.229	0.685	no	up	10.12	15.62	0.62	0.428	0.971	no	up	10.12	33.31	1.71	0.0117	0.052	no	up	pseudouridine synthase [Aspergillus ruber CBS 135680]	_	DRAP deaminase (Rib2), putative	PUS9
g5175	4.62	11.79	1.33	0.0236	0.134	no	up	5.38	13.21	1.28	0.0779	0.398	no	up	5.38	12.29	1.18	0.104	0.555	no	up	5.38	14.56	1.42	0.0348	0.12	no	up	hypothetical protein EURHEDRAFT_378833 [Aspergillus ruber CBS 135680]	_	_	_
g3563	20.21	50.99	1.33	0.024	0.135	no	up	45.27	19.38	-1.22	0.0478	0.301	no	down	45.27	56.86	0.33	0.73	1	no	up	45.27	58.44	0.37	0.586	0.77	no	up	putative vacuolar iron transporter Ccc1 [Aspergillus ruber CBS 135680]	_	Function: involved in both homeostasis of calcium and manganese ions	_
g769	15.92	40.28	1.33	0.0263	0.144	no	up	12.94	17	0.39	0.688	0.946	no	up	12.94	20.94	0.69	0.396	0.961	no	up	12.94	40.67	1.64	0.0172	0.0708	no	up	putative eukaryotic initiation factor 1A [Aspergillus ruber CBS 135680]	_	Eukaryotic initiation factor 1A, putative	EIF1AD
g4301	1.94	5.04	1.33	0.031	0.161	no	up	5.6	9.86	0.81	0.302	0.765	no	up	5.6	4.48	-0.32	0.557	1	no	down	5.6	5.2	-0.1	0.868	0.943	no	down	hypothetical protein EURHEDRAFT_515422 [Aspergillus ruber CBS 135680]	_	Pc22g09860	K07140
g1286	4.72	11.93	1.32	0.0239	0.135	no	up	2.08	8.5	1.98	0.00556	0.0674	no	up	2.08	4.77	1.16	0.11	0.573	no	up	2.08	12.55	2.54	0.000258	0.00217	yes	up	putative mitochondrial exoribonuclease Cyt-4 [Aspergillus ruber CBS 135680]	_	Mitochondrial exoribonuclease Cyt-4, putative	_
g617	5.76	14.51	1.32	0.024	0.135	no	up	3.67	5.74	0.63	0.422	0.842	no	up	3.67	3.19	-0.2	0.657	1	no	down	3.67	15.31	2.03	0.00276	0.0161	yes	up	hypothetical protein EURHEDRAFT_455293 [Aspergillus ruber CBS 135680]	_	Predicted protein	_
g2860	883.45	2205.45	1.32	0.0241	0.135	no	up	921.34	1269.12	0.46	0.59	0.916	no	up	921.34	861.07	-0.1	0.764	1	no	down	921.34	1829.61	0.99	0.137	0.315	no	up	hypothetical protein EURHEDRAFT_445107, partial [Aspergillus ruber CBS 135680]	_	RIB40 genomic DNA, SC009	RP-L23Ae, RPL23A
g1856	38.82	97.19	1.32	0.0244	0.137	no	up	29.7	56.06	0.91	0.224	0.68	no	up	29.7	30.18	0.02	0.91	1	no	up	29.7	76.41	1.36	0.0433	0.14	no	up	Brix-domain-containing protein [Aspergillus ruber CBS 135680]	_	U3 small nucleolar ribonucleoprotein protein IMP4	IMP4
g6030	6.28	15.85	1.32	0.0244	0.137	no	up	5.01	11.64	1.2	0.0988	0.454	no	up	5.01	6.61	0.39	0.655	1	no	up	5.01	19.34	1.93	0.00451	0.0242	yes	up	topoisomerase family protein Trf4 [Aspergillus ruber CBS 135680]	_	Afu7g04130 (Alt. Locus), topoisomerase family protein TRF4, putative	PAPD5_7, TRF4
g7023	32.04	79.92	1.32	0.0246	0.138	no	up	20.79	80.15	1.94	0.00664	0.0766	no	up	20.79	18.33	-0.18	0.675	1	no	down	20.79	37.28	0.84	0.209	0.418	no	up	putative ribonucleo protein [Aspergillus ruber CBS 135680]	_	Predicted protein	_
g4637	8.08	20.27	1.32	0.0252	0.14	no	up	5.88	5.99	0.03	0.913	0.992	no	up	5.88	2.88	-1	0.1	0.543	no	down	5.88	6.78	0.2	0.777	0.889	no	up	putative MFS transporter [Aspergillus ruber CBS 135680]	_	Putative uncharacterized protein	_
g1849	25.33	63.26	1.32	0.0256	0.142	no	up	20.22	53.3	1.39	0.0551	0.33	no	up	20.22	33.42	0.72	0.349	0.933	no	up	20.22	62.01	1.61	0.0177	0.0725	no	up	smr family protein [Aspergillus ruber CBS 135680]	_	Smr domain protein	_
g7222	3.3	8.37	1.32	0.0257	0.142	no	up	2.64	1.98	-0.4	0.471	0.868	no	down	2.64	1.07	-1.23	0.0534	0.369	no	down	2.64	2.37	-0.15	0.837	0.926	no	down	FAD/NAD(P)-binding domain-containing protein [Aspergillus ruber CBS 135680]	_	Pc20g04990 protein;	CDH
g6990	1.9	4.88	1.32	0.0324	0.167	no	up	1.25	1.84	0.52	0.586	0.915	no	up	1.25	3.34	1.35	0.0751	0.457	no	up	1.25	4.31	1.71	0.0164	0.0682	no	up	hypothetical protein EURHEDRAFT_374793 [Aspergillus ruber CBS 135680]	_	_	_
g6899	3.54	9.01	1.32	0.0339	0.172	no	up	3.62	2.04	-0.8	0.244	0.702	no	down	3.62	2.86	-0.33	0.568	1	no	down	3.62	12.59	1.77	0.014	0.0601	no	up	hypothetical protein NFIA_080510 [Neosartorya fischeri NRRL 181]	_	Putative uncharacterized protein	_
g2350	1.91	4.92	1.32	0.0972	0.341	no	up	1.87	2.82	0.57	0.683	0.946	no	up	1.87	3.28	0.78	0.545	1	no	up	1.87	4.21	1.13	0.195	0.4	no	up	hypothetical protein EURHEDRAFT_409098 [Aspergillus ruber CBS 135680]	_	_	_
g4312	6.7	16.77	1.31	0.0242	0.136	no	up	2.28	10.69	2.18	0.00198	0.0321	yes	up	2.28	4.3	0.89	0.222	0.807	no	up	2.28	18.16	2.94	2.5e-05	0.000281	yes	up	putative HEAT repeat protein [Aspergillus ruber CBS 135680]	_	HEAT repeat protein (DRIM), putative (AFU_orthologue; AFUA_6G08240)	UTP20
g1911	56.63	140.82	1.31	0.0249	0.139	no	up	21.74	66.7	1.61	0.0246	0.198	no	up	21.74	30.01	0.46	0.581	1	no	up	21.74	92.37	2.08	0.00234	0.014	yes	up	RNA-binding La domain protein [Aspergillus ruber CBS 135680]	_	RNA-binding La domain protein (AFU_orthologue; AFUA_1G12590)	LA, SSB
g4774	51.27	127.52	1.31	0.0251	0.14	no	up	67.39	74.31	0.14	0.962	0.999	no	up	67.39	51.56	-0.39	0.462	0.981	no	down	67.39	55.39	-0.28	0.658	0.818	no	down	putative C2H2 finger domain protein [Aspergillus ruber CBS 135680]	_	C2H2 finger domain protein, putative	BUD20
g1171	16.25	40.48	1.31	0.0253	0.14	no	up	7.95	16.91	1.08	0.143	0.548	no	up	7.95	12.62	0.66	0.395	0.961	no	up	7.95	34.92	2.12	0.002	0.0123	yes	up	hypothetical protein EURHEDRAFT_453758 [Aspergillus ruber CBS 135680]	_	_	_
g7784	35.99	89.48	1.31	0.0255	0.142	no	up	15.36	35.65	1.21	0.0996	0.455	no	up	15.36	23.64	0.62	0.437	0.975	no	up	15.36	78.81	2.35	0.000688	0.00507	yes	up	Rrp15p-domain-containing protein [Aspergillus ruber CBS 135680]	_	DUF1665 domain protein	_
g4409	32.74	81.31	1.31	0.0256	0.142	no	up	33.47	51.34	0.62	0.442	0.854	no	up	33.47	55.95	0.74	0.333	0.926	no	up	33.47	96.78	1.53	0.0233	0.0893	no	up	putative prefoldin subunit 1 [Aspergillus ruber CBS 135680]	_	Prefoldin subunit 1, putative	PFDN1
g1087	26.15	64.78	1.31	0.0256	0.142	no	up	22.18	32.25	0.54	0.516	0.89	no	up	22.18	26.15	0.24	0.834	1	no	up	22.18	62.27	1.49	0.0272	0.1	no	up	ribosomal assembly complex component Ipi3 [Aspergillus ruber CBS 135680]	_	WD repeat protein	IPI3
g1539	38.35	95.08	1.31	0.026	0.143	no	up	76.21	56.89	-0.42	0.421	0.842	no	down	76.21	75.9	-0.01	0.875	1	no	down	76.21	131.1	0.78	0.241	0.456	no	up	putative heme/steroid binding domain protein [Aspergillus ruber CBS 135680]	_	Heme/steroid binding domain protein, putative	_
g1482	12.34	30.85	1.31	0.0295	0.157	no	up	3.83	19.15	2.29	0.00258	0.0387	yes	up	3.83	12.94	1.73	0.0241	0.215	no	up	3.83	32.17	3.04	4.47e-05	0.000468	yes	up	hypothetical protein EURHEDRAFT_412591 [Aspergillus ruber CBS 135680]	_	Putative uncharacterized protein	_
g1034	0.46	1.29	1.31	0.0343	0.173	no	up	0.29	1.05	1.56	0.0413	0.275	no	up	0.29	0.72	1.07	0.187	0.746	no	up	0.29	2.2	2.56	0.000374	0.003	yes	up	hypothetical protein EURHEDRAFT_411272 [Aspergillus ruber CBS 135680]	_	_	_
g5258	3.06	7.72	1.31	0.0447	0.208	no	up	3.33	7.04	1.06	0.202	0.649	no	up	3.33	7.49	1.15	0.148	0.67	no	up	3.33	11.9	1.81	0.0126	0.0554	no	up	hypothetical protein EURHEDRAFT_511991 [Aspergillus ruber CBS 135680]	_	Putative uncharacterized protein	CTF8
g3082	0.98	2.57	1.31	0.0559	0.238	no	up	1.03	2.76	1.34	0.117	0.49	no	up	1.03	1.07	0.05	1	1	no	up	1.03	2.44	1.17	0.13	0.304	no	up	hypothetical protein EURHEDRAFT_85335 [Aspergillus ruber CBS 135680]	_	_	_
g2692	0.18	0.59	1.3	0.0164	0.103	no	up	0.16	0.28	0.55	0.468	0.866	no	up	0.16	0.05	0	1	1	no	no change	0.16	1.1	2.21	0.000545	0.00414	yes	up	hypothetical protein EURHEDRAFT_467353 [Aspergillus ruber CBS 135680]	_	Putative uncharacterized protein;	_
g8199	867.84	2134.93	1.3	0.0261	0.143	no	up	1063.97	1347.41	0.34	0.723	0.955	no	up	1063.97	756.94	-0.49	0.369	0.948	no	down	1063.97	2092.54	0.98	0.143	0.324	no	up	40S ribosomal protein S11 [Aspergillus ruber CBS 135680]	_	Pc22g20650	RP-S14e, RPS14
g663	20.23	49.94	1.3	0.0261	0.143	no	up	12.96	28.35	1.12	0.125	0.505	no	up	12.96	13.96	0.11	0.994	1	no	up	12.96	38.64	1.57	0.0199	0.0792	no	up	P-loop containing nucleoside triphosphate hydrolase protein [Aspergillus ruber CBS 135680]	_	ATP-dependent RNA helicase dbp7 (EC 3.6.1.-); ATP-binding RNA helicase involved in the bioge [...]	DDX31, DBP7
g5772	688.36	1690.42	1.3	0.0263	0.144	no	up	580.92	908.21	0.64	0.414	0.84	no	up	580.92	663.88	0.19	0.886	1	no	up	580.92	1598.79	1.46	0.0294	0.106	no	up	oxidoreductase family, NAD-binding Rossmann fold protein [Aspergillus ruber CBS 135680]	_	_	_
g7931	6.84	16.96	1.3	0.0265	0.145	no	up	3.14	7.76	1.28	0.0775	0.397	no	up	3.14	7.83	1.29	0.073	0.451	no	up	3.14	19.97	2.63	0.000156	0.0014	yes	up	hypothetical protein EURHEDRAFT_460888, partial [Aspergillus ruber CBS 135680]	_	Putative uncharacterized protein	_
g1595	14.45	35.62	1.3	0.0265	0.145	no	up	17.46	21.85	0.32	0.747	0.963	no	up	17.46	33.52	0.94	0.203	0.772	no	up	17.46	53.53	1.61	0.0167	0.0693	no	up	hypothetical protein EURHEDRAFT_520147 [Aspergillus ruber CBS 135680]	_	_	_
g6907	18.51	45.67	1.3	0.0269	0.146	no	up	77.79	36.84	-1.08	0.0744	0.388	no	down	77.79	3.89	-4.29	6.99e-09	7.91e-07	yes	down	77.79	35.75	-1.12	0.0892	0.235	no	down	hypothetical protein CFIO01_12235 [Colletotrichum fioriniae PJ7]	_	_	_
g7392	2.1	5.33	1.3	0.0316	0.163	no	up	2.12	5.51	1.34	0.0751	0.39	no	up	2.12	4.64	1.09	0.15	0.671	no	up	2.12	14.86	2.75	0.000119	0.0011	yes	up	hypothetical protein EURHEDRAFT_414784 [Aspergillus ruber CBS 135680]	_	Putative uncharacterized protein	_
g1569	10.59	26.05	1.29	0.0269	0.146	no	up	15.03	17.01	0.18	0.917	0.993	no	up	15.03	23.46	0.64	0.41	0.967	no	up	15.03	37.1	1.3	0.052	0.161	no	up	hypothetical protein EURHEDRAFT_373989 [Aspergillus ruber CBS 135680]	_	_	_
g606	44.85	109.65	1.29	0.0271	0.147	no	up	67.81	75.3	0.15	0.949	0.997	no	up	67.81	16.93	-2	0.00208	0.0321	yes	down	67.81	34.03	-0.99	0.129	0.302	no	down	hypothetical protein EURHEDRAFT_50787 [Aspergillus ruber CBS 135680]	_	Putative uncharacterized protein	_
g8225	12.78	31.37	1.29	0.0275	0.149	no	up	9.84	25.62	1.37	0.0576	0.337	no	up	9.84	17.05	0.79	0.297	0.904	no	up	9.84	24.77	1.32	0.0483	0.152	no	up	hypothetical protein EURHEDRAFT_429874, partial [Aspergillus ruber CBS 135680]	_	_	_
g5186	96.17	234.91	1.29	0.0275	0.149	no	up	48.66	109.25	1.17	0.112	0.482	no	up	48.66	98.24	1.01	0.169	0.711	no	up	48.66	188.81	1.95	0.00418	0.0228	yes	up	mitochondrial 37S ribosomal protein RSM18 [Aspergillus terreus NIH2624]	_	Putative uncharacterized protein	RP-S18, MRPS18, rpsR
g3551	13.17	32.36	1.29	0.0279	0.151	no	up	15.92	18.16	0.19	0.904	0.989	no	up	15.92	22.56	0.5	0.545	1	no	up	15.92	47.44	1.57	0.0203	0.0801	no	up	cyclin-like protein [Aspergillus ruber CBS 135680]	_	Cyclin, N-terminal domain protein, putative	_
g2562	26.89	65.76	1.29	0.028	0.151	no	up	7.01	40.95	2.53	0.000496	0.011	yes	up	7.01	11.87	0.75	0.333	0.926	no	up	7.01	49.38	2.8	7.43e-05	0.000734	yes	up	putative DNA-directed RNA polymerase I and III subunit Rpc40 [Aspergillus ruber CBS 135680]	_	Afu2g13720 (Alt. Locus), DNA-directed RNA polymerase I and III subunit Rpc40, putative, simi [...]	RPC40, POLR1C
g6889	8.91	21.88	1.29	0.0281	0.151	no	up	1.98	4.71	1.21	0.102	0.46	no	up	1.98	13.33	2.69	0.000209	0.00485	yes	up	1.98	46.12	4.47	3.52e-09	9.05e-08	yes	up	MFS general substrate transporter [Aspergillus ruber CBS 135680]	_	MFS multidrug transporter, putative	TPO1
g2786	12.61	30.93	1.29	0.0288	0.154	no	up	7.44	19.03	1.34	0.0676	0.369	no	up	7.44	15.64	1.06	0.151	0.672	no	up	7.44	31.92	2.09	0.00259	0.0152	yes	up	vacuolar membrane PQ loop repeat protein [Aspergillus ruber CBS 135680]	_	Vacuolar membrane PQ loop repeat protein	_
g6234	6.38	15.72	1.29	0.0295	0.157	no	up	6.22	10.88	0.8	0.305	0.766	no	up	6.22	8.85	0.5	0.552	1	no	up	6.22	16.74	1.41	0.0375	0.126	no	up	HIT finger domain protein [Aspergillus ruber CBS 135680]	_	HIT finger domain protein, putative	_
g7952	0.46	1.27	1.29	0.074	0.287	no	up	0.72	1.16	0.62	0.526	0.894	no	up	0.72	0.66	-0.11	0.824	1	no	down	0.72	2.94	1.89	0.01	0.0466	yes	up	cell wall glycosyl hydrolase YteR [Aspergillus ruber CBS 135680]	_	_	_
g4524	17.63	42.83	1.28	0.0281	0.151	no	up	12.33	28.01	1.18	0.105	0.466	no	up	12.33	11.82	-0.06	0.809	1	no	down	12.33	45.6	1.88	0.00548	0.0282	yes	up	U3 small nucleolar RNA-associated protein 10 [Aspergillus ruber CBS 135680]	_	U3 small nucleolar RNA-associated protein 10 ; Involved in nucleolar processing of pre-18S r [...]	UTP10, HEATR1
g7402	40.09	97.32	1.28	0.0283	0.152	no	up	33.31	48.03	0.53	0.525	0.894	no	up	33.31	52.1	0.64	0.407	0.964	no	up	33.31	130.94	1.97	0.00375	0.0208	yes	up	FAD-binding domain-containing protein [Aspergillus ruber CBS 135680]	_	Putative sequencing error Precursor (EC 1.-.-.-)	_
g231	38.09	92.32	1.28	0.0289	0.154	no	up	23.58	32.59	0.47	0.588	0.916	no	up	23.58	50.73	1.1	0.13	0.632	no	up	23.58	221.59	3.23	6.28e-06	8.13e-05	yes	up	C2H2 transcription factor , putative [Aspergillus oryzae 100-8]	_	Similarity to hypothetical transcriptional regulator CON7 - Magnaporthe grisea	_
g2489	1.37	3.47	1.28	0.0291	0.155	no	up	2.84	4.17	0.54	0.517	0.89	no	up	2.84	4.32	0.59	0.454	0.979	no	up	2.84	5.31	0.88	0.19	0.393	no	up	putative metalloreductase [Aspergillus ruber CBS 135680]	_	Metalloreductase, putative	_
g2450	82.37	200.59	1.28	0.0293	0.156	no	up	144.17	171.66	0.25	0.829	0.98	no	up	144.17	128.46	-0.17	0.693	1	no	down	144.17	253.46	0.81	0.225	0.437	no	up	_	_	_	_
g2147	3.52	8.72	1.28	0.0304	0.159	no	up	5.57	7.46	0.42	0.648	0.935	no	up	5.57	4.7	-0.24	0.615	1	no	down	5.57	11.37	1.02	0.132	0.306	no	up	hypothetical protein EURHEDRAFT_337229 [Aspergillus ruber CBS 135680]	_	_	_
g5971	112.36	271.74	1.27	0.0285	0.153	no	up	85.3	205.38	1.27	0.0801	0.403	no	up	85.3	88.7	0.06	0.949	1	no	up	85.3	156.79	0.88	0.187	0.388	no	up	putative fatty acid synthase beta subunit [Aspergillus ruber CBS 135680]	_	Fatty acid synthase beta subunit dehydratase	FAS1
g7146	26.58	64.39	1.27	0.0286	0.153	no	up	234.62	52.82	-2.15	0.000956	0.0187	yes	down	234.62	28.39	-3.04	9.17e-06	0.000356	yes	down	234.62	80.5	-1.54	0.0203	0.0802	no	down	putative sugar transporter [Aspergillus ruber CBS 135680]	_	Sugar transporter, putative	_
g1420	43.33	104.48	1.27	0.0292	0.156	no	up	23.16	52.2	1.17	0.109	0.475	no	up	23.16	34.37	0.57	0.475	0.985	no	up	23.16	96.18	2.05	0.00264	0.0155	yes	up	elongation factor G, mitochondrial [Aspergillus ruber CBS 135680]	_	Translation elongation factor G1, putative ; Mitochondrial GTPase that plays a central role [...]	fusA, GFM, EFG
g6603	28.46	68.57	1.27	0.0296	0.157	no	up	18.59	49.92	1.42	0.0487	0.306	no	up	18.59	57.49	1.62	0.0226	0.206	no	up	18.59	81.15	2.12	0.00194	0.012	yes	up	putative ribosome biogenesis GTPase Lsg1 [Aspergillus ruber CBS 135680]	_	Putative uncharacterized protein	LSG1
g3824	71.59	172.35	1.27	0.0302	0.159	no	up	55.37	105.29	0.93	0.219	0.671	no	up	55.37	109.25	0.98	0.185	0.742	no	up	55.37	160.99	1.54	0.0229	0.0882	no	up	cyclin-dependent kinase regulatory subunit [Aspergillus ruber CBS 135680]	_	Contig An16c0300, complete genome	CKS1
g6564	2.97	7.28	1.27	0.0306	0.16	no	up	5.01	7.2	0.51	0.535	0.898	no	up	5.01	7.64	0.6	0.445	0.975	no	up	5.01	16.56	1.7	0.0116	0.0516	no	up	MFS general substrate transporter [Aspergillus ruber CBS 135680]	_	Fucose permease	_
g8197	4.1	10	1.27	0.0323	0.166	no	up	2.18	2.85	0.37	0.703	0.95	no	up	2.18	3.23	0.55	0.509	0.993	no	up	2.18	22.75	3.33	4.25e-06	5.76e-05	yes	up	CBD9-like protein [Aspergillus ruber CBS 135680]	_	Function: cellobiose dehydrogenase Precursor	_
g86	2.96	7.26	1.27	0.038	0.186	no	up	0.54	3.48	2.48	0.00181	0.03	yes	up	0.54	1.76	1.54	0.0708	0.444	no	up	0.54	5.46	3.12	4.74e-05	0.00049	yes	up	alcohol dehydrogenase [Aspergillus ruber CBS 135680]	_	Alcohol dehydrogenase, putative	AKR1A1, adh
g3124	10.59	25.55	1.26	0.0299	0.158	no	up	25.64	20.95	-0.29	0.543	0.901	no	down	25.64	27.61	0.11	0.991	1	no	up	25.64	37.87	0.56	0.4	0.619	no	up	Zn(II)2Cys6 transcription factor [Aspergillus ruber CBS 135680]	_	Putative uncharacterized protein	_
g2390	23.77	57.14	1.26	0.03	0.158	no	up	15.08	34.87	1.2	0.0983	0.452	no	up	15.08	21.99	0.54	0.501	0.991	no	up	15.08	56.25	1.89	0.00537	0.0278	yes	up	putative tRNA pseudouridine synthase [Aspergillus ruber CBS 135680]	_	tRNA pseudouridine synthase, putative (AFU_orthologue; AFUA_2G08460)	truA, PUS1
g6583	46.18	110.76	1.26	0.0301	0.159	no	up	21.72	62.09	1.51	0.0355	0.251	no	up	21.72	31.75	0.55	0.496	0.99	no	up	21.72	91.71	2.07	0.0024	0.0143	yes	up	hypothetical protein EURHEDRAFT_493704 [Aspergillus ruber CBS 135680]	_	Function: gar2 is required for 18S rRNA and 40S ribosomal subunit accumulation	NOP15
g2611	33.93	81.4	1.26	0.0302	0.159	no	up	34.1	58.77	0.78	0.305	0.766	no	up	34.1	52.44	0.62	0.428	0.971	no	up	34.1	137.78	2.01	0.00314	0.0179	yes	up	hypothetical protein EURHEDRAFT_407788 [Aspergillus ruber CBS 135680]	_	_	_
g629	19.52	47.03	1.26	0.0303	0.159	no	up	22.72	29.05	0.35	0.711	0.951	no	up	22.72	35.17	0.63	0.422	0.969	no	up	22.72	63.33	1.47	0.0282	0.103	no	up	hypothetical protein EURHEDRAFT_454832 [Aspergillus ruber CBS 135680]	_	Sensitive to high expression protein 9 homolog, mitochondrial Precursor ; Required for the m [...]	SHE9
g3081	2349.74	5616.29	1.26	0.0303	0.159	no	up	803.09	791.01	-0.02	0.841	0.982	no	down	803.09	1223.54	0.61	0.437	0.975	no	up	803.09	5346.31	2.73	9.02e-05	0.000862	yes	up	hypothetical protein EURHEDRAFT_403313 [Aspergillus ruber CBS 135680]	_	_	_
g1091	31.14	74.6	1.26	0.0303	0.159	no	up	24.44	50.83	1.05	0.152	0.567	no	up	24.44	62.13	1.34	0.0609	0.402	no	up	24.44	91.62	1.9	0.00506	0.0266	yes	up	hypothetical protein EURHEDRAFT_411331 [Aspergillus ruber CBS 135680]	_	_	_
g2007	1708.93	4081.51	1.26	0.0304	0.159	no	up	1398.69	2111.08	0.59	0.459	0.862	no	up	1398.69	1286.55	-0.12	0.738	1	no	down	1398.69	2504.26	0.84	0.206	0.414	no	up	ribosomal protein L1 [Aspergillus ruber CBS 135680]	_	Ribosomal protein L1	RP-L10Ae, RPL10A
g887	10.54	25.47	1.26	0.0308	0.16	no	up	17.1	16.18	-0.08	0.781	0.973	no	down	17.1	22.7	0.41	0.641	1	no	up	17.1	26.91	0.65	0.33	0.553	no	up	putative F-box and JmjC domain protein [Aspergillus ruber CBS 135680]	_	Similarity to hypothetical protein F3F9.18 - Arabidopsis thaliana	_
g406	20.92	50.08	1.26	0.0313	0.162	no	up	17.3	44.33	1.35	0.0621	0.353	no	up	17.3	23.81	0.46	0.586	1	no	up	17.3	66.63	1.94	0.00449	0.0241	yes	up	hypothetical protein EURHEDRAFT_450046 [Aspergillus ruber CBS 135680]	_	Putative uncharacterized protein	E3.6.1.52
g5512	6.77	16.36	1.26	0.0332	0.17	no	up	4.85	13.07	1.41	0.0557	0.332	no	up	4.85	11	1.17	0.115	0.589	no	up	4.85	13.65	1.47	0.0318	0.113	no	up	Swi3-domain-containing protein [Aspergillus ruber CBS 135680]	_	Chromosome segregation in meiosis protein 3 ; Forms a fork protection complex (FPC) with tof [...]	CSM3, SWI3
g4261	49.9	119.21	1.25	0.0308	0.16	no	up	43.97	56.87	0.37	0.691	0.946	no	up	43.97	43.9	0	0.879	1	no	down	43.97	118.5	1.43	0.0333	0.116	no	up	putative MFS phospholipid transporter [Aspergillus ruber CBS 135680]	_	Afu6g07750 (Alt. Locus), MFS phospholipid transporter (Git1), putative	_
g2886	78.33	186.9	1.25	0.0309	0.161	no	up	33.45	99.73	1.57	0.0286	0.217	no	up	33.45	34.2	0.03	0.923	1	no	up	33.45	94.96	1.5	0.0256	0.0953	no	up	zinc knuckle domain protein [Aspergillus clavatus NRRL 1]	_	Zinc knuckle domain protein	CNBP
g4665	40.18	95.49	1.25	0.0316	0.163	no	up	23.67	63.28	1.41	0.0495	0.309	no	up	23.67	29.73	0.33	0.728	1	no	up	23.67	86.66	1.87	0.00587	0.0299	yes	up	DEAD-domain-containing protein [Aspergillus ruber CBS 135680]	_	ATP-dependent RNA helicase has1 (EC 3.6.1.-); ATP-dependent RNA helicase involved in 40S rib [...]	DDX18, HAS1
g2136	5.61	13.45	1.25	0.0342	0.173	no	up	8.68	7.83	-0.15	0.71	0.951	no	down	8.68	5.3	-0.7	0.233	0.825	no	down	8.68	17.51	1	0.134	0.311	no	up	putative aminotransferase [Aspergillus ruber CBS 135680]	_	Aminotransferase, putative	bioF
g6235	12.08	28.81	1.25	0.0351	0.176	no	up	11.42	17.85	0.64	0.431	0.848	no	up	11.42	39.69	1.79	0.0133	0.137	no	up	11.42	28.48	1.31	0.0538	0.164	no	up	oxidoreductase [Aspergillus ruber CBS 135680]	_	Putative uncharacterized protein	_
g5411	28.09	66.63	1.24	0.0318	0.164	no	up	110.43	41.88	-1.4	0.0241	0.195	no	down	110.43	35.74	-1.62	0.0103	0.113	no	down	110.43	93.24	-0.24	0.699	0.843	no	down	PAP2 domain protein [Aspergillus ruber CBS 135680]	_	Phosphatidic acid phosphatase, putative	_
g6714	84.36	199.81	1.24	0.0319	0.165	no	up	58.77	131.23	1.16	0.112	0.482	no	up	58.77	126.25	1.1	0.128	0.625	no	up	58.77	172.93	1.56	0.0206	0.0811	no	up	assimilatory sulfite reductase [Aspergillus ruber CBS 135680]	_	Assimilatory sulfite reductase	cysJ
g2861	129.26	305.9	1.24	0.0323	0.166	no	up	82.1	144.36	0.81	0.285	0.748	no	up	82.1	166.92	1.02	0.162	0.695	no	up	82.1	218.96	1.41	0.0353	0.121	no	up	putative mitochondrial intermembrane space translocase subunit Tim10 [Aspergillus ruber CBS 135680]	_	Mitochondrial intermembrane space translocase subunit Tim10, putative	TIM8
g5984	37.56	89.06	1.24	0.0323	0.167	no	up	17.51	67.78	1.95	0.00659	0.0763	no	up	17.51	35.79	1.03	0.161	0.694	no	up	17.51	66.66	1.92	0.00479	0.0255	yes	up	hypothetical protein EURHEDRAFT_516933 [Aspergillus ruber CBS 135680]	_	G-patch RNA maturation protein (Gno1), putative (AFU_orthologue; AFUA_7G03690)	PINX1
g6955	12.95	30.76	1.24	0.0324	0.167	no	up	7.01	18.26	1.37	0.0578	0.337	no	up	7.01	10.86	0.62	0.422	0.969	no	up	7.01	29.11	2.04	0.00281	0.0163	yes	up	ATP-dependent RNA helicase dbp4 [Aspergillus ruber CBS 135680]	_	ATP-dependent RNA helicase dbp4 (EC 3.6.1.-); ATP-dependent RNA helicase required for riboso [...]	DDX10, DBP4
g6791	54.37	128.8	1.24	0.0326	0.167	no	up	50.21	109.85	1.13	0.125	0.505	no	up	50.21	47.24	-0.09	0.78	1	no	down	50.21	98.23	0.97	0.148	0.331	no	up	putative rRNA processing protein [Aspergillus ruber CBS 135680]	_	hypothetical protein	PNO1, DIM2
g3197	83.35	196.34	1.24	0.0332	0.17	no	up	38.57	94.62	1.29	0.0751	0.39	no	up	38.57	95.5	1.31	0.0697	0.44	no	up	38.57	170	2.14	0.00182	0.0115	yes	up	ERG2 and sigma1 receptor-like protein [Aspergillus ruber CBS 135680]	_	C-8 sterol isomerase (Erg-1), putative	ERG2
g6716	8.5	20.24	1.24	0.0337	0.172	no	up	8.07	17.19	1.08	0.144	0.55	no	up	8.07	10.07	0.32	0.749	1	no	up	8.07	22.85	1.49	0.0278	0.102	no	up	FtsJ-domain-containing protein [Aspergillus ruber CBS 135680]	_	tRNA methyltransferase, putative	FTSJ1, TRM7
g4148	9.75	23.19	1.24	0.0353	0.177	no	up	12.4	24.56	0.98	0.193	0.637	no	up	12.4	18.03	0.54	0.511	0.994	no	up	12.4	27.36	1.14	0.0945	0.245	no	up	putative HIT finger domain protein [Aspergillus ruber CBS 135680]	_	HIT finger domain protein, putative	ZNHIT1, VPS71
g5862	1.63	3.98	1.24	0.0406	0.194	no	up	0.56	0.85	0.53	0.605	0.918	no	up	0.56	1.7	1.45	0.0705	0.443	no	up	0.56	1.9	1.6	0.0298	0.107	no	up	hypothetical protein EURHEDRAFT_520055 [Aspergillus ruber CBS 135680]	_	_	_
g1398	3.74	8.96	1.24	0.0554	0.237	no	up	4.53	2.3	-0.95	0.191	0.635	no	down	4.53	12.75	1.47	0.0586	0.393	no	up	4.53	9.61	1.07	0.153	0.338	no	up	hypothetical protein EURHEDRAFT_377874 [Aspergillus ruber CBS 135680]	_	_	_
g6068	386.86	910.68	1.23	0.0329	0.168	no	up	355.21	614.04	0.79	0.3	0.765	no	up	355.21	280.7	-0.34	0.504	0.991	no	down	355.21	665.32	0.91	0.174	0.37	no	up	40S ribosomal protein S28 [Cladophialophora yegresii CBS 114405]	_	Putative uncharacterized protein	RP-S28e, RPS28
g4881	135.92	319.35	1.23	0.0332	0.17	no	up	73.41	167	1.18	0.104	0.464	no	up	73.41	87.93	0.26	0.805	1	no	up	73.41	239.44	1.7	0.0115	0.0516	no	up	Nop domain-containing protein [Aspergillus ruber CBS 135680]	_	Nucleolar protein 58 ; Required for pre-18S rRNA processing. May bind microtubules (By similarity)	NOP58
g7151	1712.81	4009.52	1.23	0.0338	0.172	no	up	1346.87	2621.35	0.96	0.196	0.641	no	up	1346.87	1389.29	0.04	0.935	1	no	up	1346.87	2788.6	1.05	0.115	0.279	no	up	hypothetical protein EURHEDRAFT_513068 [Aspergillus ruber CBS 135680]	_	40S ribosomal protein S21	RP-S21e, RPS21
g2824	19.6	46	1.23	0.0339	0.172	no	up	15.69	11.64	-0.43	0.415	0.84	no	down	15.69	24.57	0.64	0.406	0.964	no	up	15.69	108.72	2.78	6.8e-05	0.000675	yes	up	hypothetical protein EURHEDRAFT_17587 [Aspergillus ruber CBS 135680]	_	_	_
g5606	45.08	105.74	1.23	0.0339	0.172	no	up	92.84	110.77	0.25	0.825	0.978	no	up	92.84	88.85	-0.06	0.805	1	no	down	92.84	82.31	-0.17	0.781	0.891	no	down	PLC-like phosphodiesterase [Aspergillus ruber CBS 135680]	_	Similarity to hypothetical protein SC4G1.04c - Streptomyces coelicolor Precursor	_
g1165	11.1	26.17	1.23	0.0345	0.174	no	up	2.71	17.75	2.67	0.000257	0.00659	yes	up	2.71	9.51	1.77	0.014	0.143	no	up	2.71	16.77	2.59	0.000232	0.00198	yes	up	MIP transporter [Aspergillus niger CBS 513.88]	_	Predicted protein	_
g5123	0.61	1.57	1.23	0.0475	0.216	no	up	0.72	0.57	-0.29	0.637	0.932	no	down	0.72	0.22	-1.36	0.0741	0.455	no	down	0.72	2.61	1.72	0.015	0.0636	no	up	CobW domain protein [Aspergillus ruber CBS 135680]	_	CobW domain protein	_
g800	1.55	3.78	1.23	0.0528	0.23	no	up	0.85	0.98	0.19	1	1	no	up	0.85	6.3	2.75	0.000493	0.0097	yes	up	0.85	6.21	2.73	0.000298	0.00247	yes	up	pyrroline-5-carboxylate reductase [Aspergillus ruber CBS 135680]	_	_	proC
g1379	1268.5	2963.66	1.22	0.0341	0.173	no	up	970.77	1669.67	0.78	0.305	0.766	no	up	970.77	1027.24	0.08	0.98	1	no	up	970.77	2065.99	1.09	0.102	0.259	no	up	60S ribosomal protein L11 [Aspergillus ruber CBS 135680]	_	60S ribosomal protein L11	RP-L11e, RPL11
g1631	68.92	161.05	1.22	0.0342	0.173	no	up	62.97	33.76	-0.9	0.127	0.51	no	down	62.97	209.14	1.73	0.0148	0.148	no	up	62.97	101.33	0.69	0.302	0.526	no	up	hypothetical protein EURHEDRAFT_446411 [Aspergillus ruber CBS 135680]	_	Putative uncharacterized protein	_
g661	14.98	35.15	1.22	0.0342	0.173	no	up	14.22	21.05	0.56	0.49	0.877	no	up	14.22	19.61	0.46	0.581	1	no	up	14.22	29.88	1.07	0.11	0.271	no	up	acyltransferase [Aspergillus ruber CBS 135680]	_	Acyltransferase, putative	_
g2275	14.93	34.91	1.22	0.0348	0.175	no	up	12.54	19.87	0.66	0.402	0.832	no	up	12.54	14	0.16	0.93	1	no	up	12.54	29.75	1.24	0.0637	0.185	no	up	6PF2K-domain-containing protein [Aspergillus ruber CBS 135680]	_	RNA polymerase II Elongator subunit, putative	ELP2
g5584	16.57	38.72	1.22	0.0358	0.179	no	up	9.88	21.67	1.13	0.128	0.512	no	up	9.88	25.15	1.34	0.0636	0.414	no	up	9.88	44.32	2.15	0.00177	0.0112	yes	up	pentatricopeptide repeat protein, partial [Aspergillus ruber CBS 135680]	_	_	_
g1230	36.99	86.17	1.22	0.0358	0.179	no	up	22.32	51.03	1.19	0.105	0.466	no	up	22.32	40.53	0.86	0.252	0.851	no	up	22.32	63.76	1.51	0.0253	0.0945	no	up	DNA-directed RNA polymerases N/8 kDa subunit superfamily [Aspergillus ruber CBS 135680]	_	DNA-directed RNA polymerases N/8 kDa subunit superfamily	RPB10, POLR2L
g2392	9.98	23.33	1.22	0.0359	0.179	no	up	5.08	15.12	1.55	0.0309	0.228	no	up	5.08	9.68	0.92	0.217	0.8	no	up	5.08	22.57	2.13	0.00195	0.0121	yes	up	P-loop containing nucleoside triphosphate hydrolase protein [Aspergillus ruber CBS 135680]	_	ATP-dependent RNA helicase mrh4, mitochondrial Precursor (EC 3.6.1.-); ATP-binding RNA helic [...]	MRH4
g2943	12.34	28.85	1.22	0.036	0.179	no	up	16.13	20.62	0.35	0.711	0.951	no	up	16.13	12.92	-0.32	0.53	1	no	down	16.13	24.3	0.59	0.381	0.601	no	up	hypothetical protein EURHEDRAFT_445093 [Aspergillus ruber CBS 135680]	_	Afu1g07080 (Alt. Locus), tRNA-specific adenosine-34 deaminase subunit Tad3, putative, simila [...]	TAD3, ADAT3
g7020	23.77	55.5	1.22	0.0397	0.191	no	up	23.74	26.73	0.17	0.937	0.996	no	up	23.74	30.72	0.37	0.692	1	no	up	23.74	44.88	0.92	0.182	0.382	no	up	hypothetical protein EURHEDRAFT_374761 [Aspergillus ruber CBS 135680]	_	Putative uncharacterized protein	_
g7391	1.59	3.84	1.22	0.0434	0.203	no	up	1.63	4.45	1.4	0.0644	0.359	no	up	1.63	1.43	-0.18	0.723	1	no	down	1.63	2.88	0.78	0.28	0.5	no	up	PLP-dependent transferase [Aspergillus ruber CBS 135680]	_	_	_
g6935	1721.08	3990.69	1.21	0.0355	0.178	no	up	1541.72	2501.45	0.7	0.369	0.812	no	up	1541.72	1371.96	-0.17	0.684	1	no	down	1541.72	3022.94	0.97	0.144	0.326	no	up	ribosomal protein L26 [Aspergillus ruber CBS 135680]	_	Ribosomal protein L26	RP-L26e, RPL26
g1315	29.85	69.17	1.21	0.0362	0.18	no	up	29.61	66.45	1.16	0.111	0.48	no	up	29.61	37.64	0.35	0.708	1	no	up	29.61	66.95	1.17	0.0787	0.214	no	up	hypothetical protein EURHEDRAFT_377967 [Aspergillus ruber CBS 135680]	_	_	_
g4139	27.09	62.77	1.21	0.0363	0.18	no	up	59.05	46.91	-0.33	0.503	0.885	no	down	59.05	155.14	1.39	0.0516	0.362	no	up	59.05	142.44	1.27	0.0577	0.173	no	up	Clavaminate synthase-like protein [Aspergillus ruber CBS 135680]	_	Pc22g09710	_
g8248	113.88	262.91	1.21	0.0364	0.181	no	up	83.02	138.26	0.74	0.34	0.794	no	up	83.02	136.17	0.71	0.349	0.933	no	up	83.02	227.7	1.45	0.0301	0.108	no	up	6-phosphofructokinase pfkA [Aspergillus ruber CBS 135680]	_	6-phosphofructokinase alpha subunit	pfkA, PFK
g1791	83.7	193.23	1.21	0.0366	0.181	no	up	38.27	97.24	1.34	0.0635	0.357	no	up	38.27	54.46	0.51	0.533	1	no	up	38.27	161.83	2.08	0.00237	0.0142	yes	up	L30e-like protein [Aspergillus ruber CBS 135680]	_	Small nuclear ribonucleoprotein complex protein Nhp2, putative	NHP2, NOLA2
g588	20.31	46.98	1.21	0.0368	0.182	no	up	7.04	1.38	-2.27	0.000614	0.0131	yes	down	7.04	5.44	-0.37	0.484	0.988	no	down	7.04	63.46	3.15	9.32e-06	0.000115	yes	up	hypothetical protein EURHEDRAFT_50299 [Aspergillus ruber CBS 135680]	_	Contig An13c0060, complete genome	_
g486	27.3	63.11	1.21	0.0369	0.182	no	up	16.01	42.59	1.41	0.0517	0.316	no	up	16.01	27.69	0.79	0.297	0.904	no	up	16.01	60.16	1.9	0.00517	0.027	yes	up	hypothetical protein EURHEDRAFT_400686 [Aspergillus ruber CBS 135680]	_	_	BUD21, UTP16
g874	17.79	41.24	1.21	0.0373	0.183	no	up	16.8	20.57	0.29	0.783	0.974	no	up	16.8	18.57	0.14	0.951	1	no	up	16.8	38.12	1.18	0.0793	0.216	no	up	hypothetical protein EURHEDRAFT_408513 [Aspergillus ruber CBS 135680]	_	Predicted protein	_
g1421	24.77	57.54	1.21	0.0413	0.196	no	up	14.74	23.34	0.66	0.431	0.848	no	up	14.74	43.1	1.54	0.0365	0.287	no	up	14.74	52.86	1.84	0.00858	0.0411	yes	up	hypothetical protein EURHEDRAFT_412688 [Aspergillus ruber CBS 135680]	_	Putative uncharacterized protein	_
g6698	0.37	0.99	1.21	0.105	0.356	no	up	0.36	0.22	0	1	1	no	no change	0.36	0.3	0	1	1	no	no change	0.36	1.05	1.32	0.105	0.263	no	up	TPA: mitochondrial hypoxia responsive domain protein (AFU_orthologue; AFUA_1G12250) [Aspergillus nidulans FGSC A4]	_	mitochondrial hypoxia responsive domain protein (AFU_orthologue; AFUA_1G12250)	_
g7731	13.83	32.01	1.2	0.0366	0.181	no	up	16.44	25.11	0.61	0.446	0.856	no	up	16.44	24.68	0.58	0.459	0.981	no	up	16.44	44.39	1.43	0.033	0.116	no	up	exportin-T [Aspergillus ruber CBS 135680]	_	Exportin-T (tRNA exportin)(Exportin(tRNA))(Karyopherin-beta); tRNA nucleus export receptor w [...]	XPOT
g4496	913	2101.86	1.2	0.0369	0.182	no	up	700.81	1232.07	0.81	0.283	0.747	no	up	700.81	716.79	0.03	0.92	1	no	up	700.81	1698.59	1.28	0.056	0.17	no	up	carbon-nitrogen hydrolase [Aspergillus ruber CBS 135680]	_	60S ribosomal protein L31e (AFU_orthologue; AFUA_6G13250)	RP-L31e, RPL31
g2951	72.88	167.86	1.2	0.037	0.182	no	up	39.24	78.34	1	0.179	0.616	no	up	39.24	66.83	0.77	0.31	0.91	no	up	39.24	157.04	2	0.00333	0.0188	yes	up	putative 30S ribosomal subunit S4 [Aspergillus ruber CBS 135680]	_	Afu1g06980 (Alt. Locus), 30S ribosomal subunit S4, putative, similar to SP:P27929: NAM9 pro [...]	_
g3224	370.09	850.74	1.2	0.0374	0.184	no	up	213.39	374.06	0.81	0.288	0.752	no	up	213.39	364.98	0.77	0.305	0.907	no	up	213.39	566.08	1.41	0.0362	0.123	no	up	putative mitochondrial intermembrane space translocase subunit Tim10 [Aspergillus ruber CBS 135680]	_	Mitochondrial import inner membrane translocase subunit tim10	TIM10
g1354	1369.5	3141.34	1.2	0.0375	0.184	no	up	1244.22	1759.92	0.5	0.55	0.903	no	up	1244.22	1240.83	0	0.876	1	no	down	1244.22	2601.44	1.06	0.11	0.271	no	up	40S ribosomal protein S24 [Neosartorya fischeri NRRL 181]	_	40S ribosomal protein S24	RP-S24e, RPS24
g5846	169.64	389.83	1.2	0.0382	0.186	no	up	224.93	270.06	0.26	0.815	0.977	no	up	224.93	292.17	0.38	0.673	1	no	up	224.93	342.21	0.61	0.366	0.586	no	up	hypothetical protein EURHEDRAFT_408013 [Aspergillus ruber CBS 135680]	_	Putative uncharacterized protein	_
g1878	19.92	45.83	1.2	0.0395	0.191	no	up	19.68	29.34	0.57	0.483	0.875	no	up	19.68	35.53	0.85	0.257	0.859	no	up	19.68	60.01	1.6	0.0179	0.0731	no	up	putative kinetochore protein fta4 [Aspergillus ruber CBS 135680]	_	Kinetochore protein fta4, putative	_
g4717	8.52	19.65	1.2	0.0408	0.194	no	up	11.69	3.69	-1.64	0.0117	0.115	no	down	11.69	9.38	-0.31	0.543	1	no	down	11.69	17.6	0.59	0.384	0.604	no	up	alpha/beta-hydrolase [Aspergillus ruber CBS 135680]	_	conserved hypothetical protein	_
g2353	8.36	19.28	1.2	0.0411	0.196	no	up	10.02	8.55	-0.23	0.628	0.93	no	down	10.02	10.62	0.08	0.991	1	no	up	10.02	21.54	1.1	0.106	0.265	no	up	short chain dehydrogenase/reductase family protein [Aspergillus ruber CBS 135680]	_	Putative uncharacterized protein	E1.-.-.-
g5080	0.79	1.94	1.2	0.059	0.248	no	up	3.82	4.56	0.25	0.848	0.982	no	up	3.82	9.4	1.28	0.0843	0.492	no	up	3.82	2.31	-0.7	0.306	0.529	no	down	Pc22g16660 [Penicillium rubens Wisconsin 54-1255]	_	Pc22g16660	_
g3427	2.85	6.7	1.2	0.0702	0.277	no	up	2.19	5.51	1.29	0.145	0.551	no	up	2.19	1.28	-0.73	0.426	0.971	no	down	2.19	4.72	1.07	0.178	0.378	no	up	hypothetical protein EURHEDRAFT_143084 [Aspergillus ruber CBS 135680]	_	_	_
g4550	1315.26	3010.77	1.19	0.0379	0.185	no	up	1389.46	1890.68	0.44	0.608	0.92	no	up	1389.46	1147.5	-0.28	0.567	1	no	down	1389.46	2479.33	0.84	0.209	0.417	no	up	ribosomal protein S13 [Aspergillus ruber CBS 135680]	_	Ribosomal protein S13p/S18e	RP-S18e, RPS18
g5909	25.51	58.29	1.19	0.0393	0.19	no	up	24.67	37	0.58	0.472	0.869	no	up	24.67	31.5	0.35	0.701	1	no	up	24.67	85.31	1.79	0.00838	0.0402	yes	up	hypothetical protein EURHEDRAFT_455349 [Aspergillus ruber CBS 135680]	_	Neutral amino acid permease, putative	_
g1713	17.43	39.76	1.19	0.0395	0.191	no	up	8.25	28.85	1.79	0.0121	0.118	no	up	8.25	12.85	0.63	0.416	0.969	no	up	8.25	39.17	2.23	0.00114	0.00773	yes	up	DEAD-domain-containing protein [Aspergillus ruber CBS 135680]	_	ATP-dependent RNA helicase (Drs1), putative	DDX27, DRS1
g5088	17.77	40.56	1.19	0.0395	0.191	no	up	13.57	10.11	-0.42	0.425	0.844	no	down	13.57	73.66	2.43	0.000677	0.0126	yes	up	13.57	138.42	3.34	3.17e-06	4.42e-05	yes	up	putative MFS monosaccharide transporter [Aspergillus ruber CBS 135680]	_	MFS monosaccharide transporter, putative	_
g3624	20.76	47.35	1.19	0.04	0.192	no	up	26.64	32.23	0.27	0.805	0.975	no	up	26.64	23.42	-0.19	0.668	1	no	down	26.64	56.78	1.09	0.103	0.261	no	up	PDCD2_C domain protein [Aspergillus ruber CBS 135680]	_	_	TSR4
g733	47.73	108.61	1.18	0.0394	0.19	no	up	41.78	67.95	0.7	0.368	0.812	no	up	41.78	41.24	-0.02	0.859	1	no	down	41.78	100.52	1.26	0.0584	0.175	no	up	putative pre-mRNA splicing factor RNA helicase [Aspergillus ruber CBS 135680]	_	Contig An18c0080, complete genome	DHX15, PRP43
g2972	13.92	31.74	1.18	0.04	0.192	no	up	34.43	23.87	-0.53	0.334	0.789	no	down	34.43	32.91	-0.06	0.804	1	no	down	34.43	79.99	1.21	0.0693	0.197	no	up	putative GPI transamidase component PIG-S [Aspergillus ruber CBS 135680]	_	Pc18g05640	PIGS
g6824	14.56	33.04	1.18	0.0403	0.192	no	up	3.08	25.13	2.99	3.7e-05	0.00147	yes	up	3.08	9.57	1.6	0.0231	0.209	no	up	3.08	33.14	3.39	2.21e-06	3.18e-05	yes	up	P-loop containing nucleoside triphosphate hydrolase protein [Aspergillus ruber CBS 135680]	_	ABC multidrug transporter Mdr1	ABCB1
g1231	30.76	69.69	1.18	0.0404	0.193	no	up	29.07	52.83	0.86	0.254	0.711	no	up	29.07	29.83	0.04	0.927	1	no	up	29.07	68.24	1.23	0.0658	0.19	no	up	WD domain protein [Aspergillus ruber CBS 135680]	_	_	NAN1, UTP17, WDR75
g6243	118.54	268.04	1.18	0.0406	0.194	no	up	137.67	119.69	-0.2	0.636	0.932	no	down	137.67	194.69	0.5	0.541	1	no	up	137.67	289.64	1.07	0.108	0.268	no	up	hypothetical protein EURHEDRAFT_414896 [Aspergillus ruber CBS 135680]	_	Uncharacterized conserved protein	_
g3470	19.79	44.96	1.18	0.0407	0.194	no	up	12.88	30.76	1.25	0.086	0.419	no	up	12.88	12.15	-0.08	0.786	1	no	down	12.88	36.26	1.49	0.0273	0.101	no	up	DEAD-domain-containing protein [Aspergillus ruber CBS 135680]	_	ATP-dependent RNA helicase dbp8 (EC 3.6.1.-); ATP-binding RNA helicase involved in 40S ribos [...]	DDX49, DBP8
g2963	17.39	39.49	1.18	0.0413	0.196	no	up	6.82	20.88	1.6	0.0269	0.209	no	up	6.82	14.39	1.07	0.15	0.671	no	up	6.82	30.91	2.16	0.00168	0.0107	yes	up	WD repeat-containing protein jip5 [Aspergillus ruber CBS 135680]	_	Nucleolar protein Jip5, putative	_
g8128	6.6	15.03	1.18	0.044	0.206	no	up	3.2	8.34	1.35	0.0676	0.369	no	up	3.2	18.51	2.5	0.000625	0.0118	yes	up	3.2	9.32	1.51	0.028	0.102	no	up	hypothetical protein AOR_1_1140024 [Aspergillus oryzae RIB40]	_	_	_
g758	3.66	8.4	1.18	0.0449	0.208	no	up	4.34	8.21	0.9	0.236	0.692	no	up	4.34	15.47	1.81	0.012	0.127	no	up	4.34	18.03	2.03	0.0033	0.0186	yes	up	hypothetical protein AOR_1_526094 [Aspergillus oryzae RIB40]	_	_	WDR48, UAF1
g4211	3.69	8.48	1.18	0.0474	0.216	no	up	3.34	3.88	0.21	0.9	0.988	no	up	3.34	1.5	-1.1	0.102	0.551	no	down	3.34	0.99	-1.66	0.025	0.0938	no	down	putative LaeA-like methyltransferase [Aspergillus ruber CBS 135680]	_	_	_
g2958	2.27	5.27	1.18	0.0489	0.221	no	up	2.65	5.93	1.13	0.131	0.519	no	up	2.65	3.14	0.24	0.857	1	no	up	2.65	7.95	1.55	0.0241	0.0913	no	up	hypothetical protein EURHEDRAFT_519730 [Aspergillus ruber CBS 135680]	_	_	_
g848	15.44	34.95	1.17	0.0415	0.197	no	up	14.39	25.03	0.79	0.299	0.765	no	up	14.39	15.73	0.13	0.967	1	no	up	14.39	36.66	1.34	0.0454	0.146	no	up	sucrose transport protein [Aspergillus ruber CBS 135680]	_	Contig An02c0390, complete genome. Precursor	SLC45A1_2_4
g3116	22.24	50.2	1.17	0.0416	0.197	no	up	170.92	36.1	-2.24	0.00062	0.0132	yes	down	170.92	31.2	-2.45	0.000228	0.00523	yes	down	170.92	22.54	-2.92	3.12e-05	0.000341	yes	down	aldehyde dehydrogenase [Aspergillus ruber CBS 135680]	_	Putative uncharacterized protein	_
g2750	61.13	137.34	1.17	0.0421	0.199	no	up	34.34	82.14	1.26	0.0837	0.412	no	up	34.34	55.29	0.69	0.372	0.95	no	up	34.34	122.74	1.83	0.00679	0.0338	yes	up	SURF6-domain-containing protein [Aspergillus ruber CBS 135680]	_	60S ribosome biogenesis protein Rrp14, putative	_
g1591	873.96	1960.09	1.17	0.0421	0.199	no	up	707.1	1084.08	0.62	0.439	0.853	no	up	707.1	671.38	-0.07	0.791	1	no	down	707.1	1495.21	1.08	0.105	0.264	no	up	40S ribosomal protein S22 [Aspergillus ruber CBS 135680]	_	40S ribosomal protein S22	RP-S15Ae, RPS15A
g232	4.75	10.78	1.17	0.0426	0.201	no	up	3.22	7.81	1.25	0.0835	0.412	no	up	3.22	6.55	1	0.171	0.718	no	up	3.22	14.41	2.13	0.00181	0.0114	yes	up	hypothetical protein EURHEDRAFT_375367 [Aspergillus ruber CBS 135680]	_	_	_
g2359	4.1	9.34	1.17	0.0451	0.209	no	up	0.65	6.63	3.17	3.09e-05	0.00129	yes	up	0.65	0.57	-0.16	0.768	1	no	down	0.65	2.51	1.8	0.0117	0.052	no	up	fatty acid hydroxylase superfamily protein [Aspergillus ruber CBS 135680]	_	Putative uncharacterized protein	_
g8229	2.75	6.33	1.17	0.0467	0.214	no	up	3.11	4.81	0.61	0.46	0.862	no	up	3.11	6.1	0.95	0.21	0.784	no	up	3.11	6.35	1.01	0.141	0.321	no	up	hypothetical protein ASPNIDRAFT_45622 [Aspergillus niger ATCC 1015]	_	_	_
g6812	7.29	16.52	1.17	0.0506	0.225	no	up	3.98	9.39	1.22	0.116	0.489	no	up	3.98	9.32	1.21	0.113	0.582	no	up	3.98	20.06	2.3	0.00133	0.00878	yes	up	peptidyl-tRNA hydrolase [Aspergillus ruber CBS 135680]	_	Putative uncharacterized protein	PTH1, pth, spoVC
g1454	24.98	56.1	1.16	0.0422	0.199	no	up	14.68	32.77	1.15	0.113	0.485	no	up	14.68	14.17	-0.05	0.822	1	no	down	14.68	48.64	1.72	0.0107	0.0487	yes	up	small nucleolar ribonucleo protein complex subunit [Aspergillus ruber CBS 135680]	_	Small nucleolar ribonucleoprotein complex subunit, putative	UTP4, CIRH1A
g4784	12.87	28.95	1.16	0.0428	0.201	no	up	7.6	14.33	0.91	0.226	0.682	no	up	7.6	16.53	1.11	0.127	0.623	no	up	7.6	96.54	3.65	5.08e-07	8.72e-06	yes	up	hypothetical protein EURHEDRAFT_381373 [Aspergillus ruber CBS 135680]	_	_	_
g2779	925.27	2067.08	1.16	0.0429	0.202	no	up	707.12	1018.43	0.53	0.524	0.894	no	up	707.12	836.92	0.24	0.825	1	no	up	707.12	1825.55	1.37	0.0409	0.135	no	up	40S ribosomal protein S26 [Aspergillus flavus NRRL3357]	_	40S ribosomal protein S26	RP-S26e, RPS26
g2705	1904.59	4251.04	1.16	0.0431	0.202	no	up	1946.09	2352.68	0.27	0.801	0.975	no	up	1946.09	1686.24	-0.21	0.641	1	no	down	1946.09	3560.31	0.87	0.19	0.393	no	up	ribosomal protein L13 [Aspergillus ruber CBS 135680]	_	Ribosomal protein L16a	RP-L13Ae, RPL13A
g2733	25.04	56.04	1.16	0.0435	0.204	no	up	12.44	29.27	1.23	0.0927	0.439	no	up	12.44	17.09	0.46	0.591	1	no	up	12.44	56.38	2.17	0.00158	0.0101	yes	up	putative ATP-dependent RNA helicase [Aspergillus ruber CBS 135680]	_	ATP-dependent rRNA helicase rrp3 (EC 3.6.1.-); Required for pre-ribosomal RNA processing. In [...]	DDX47, RRP3
g6336	25.63	57.33	1.16	0.0448	0.208	no	up	177.82	60.52	-1.55	0.0134	0.128	no	down	177.82	11.61	-3.93	5.94e-08	4.8e-06	yes	down	177.82	11.6	-3.93	1.02e-07	2.06e-06	yes	down	hypothetical protein EURHEDRAFT_284854 [Aspergillus ruber CBS 135680]	_	Pc21g14510	_
g6954	6.71	15.12	1.16	0.0448	0.208	no	up	9.58	8.52	-0.17	0.685	0.946	no	down	9.58	9.91	0.05	0.948	1	no	up	9.58	10.28	0.1	0.893	0.954	no	up	putative amino acid permease [Aspergillus ruber CBS 135680]	_	Similarity to lysine-specific permease lysP - Escherichia coli	TC.AAT
g278	5.84	13.19	1.16	0.0461	0.212	no	up	2.7	4.01	0.55	0.518	0.891	no	up	2.7	5.81	1.08	0.145	0.665	no	up	2.7	19.97	2.84	6.51e-05	0.000649	yes	up	putative aryl-alcohol dehydrogenase Aad14 [Aspergillus ruber CBS 135680]	_	Aryl-alcohol dehydrogenase Aad14, putative	_
g1508	1.94	4.46	1.16	0.0507	0.225	no	up	0.93	2.6	1.39	0.0665	0.365	no	up	0.93	1.55	0.68	0.398	0.961	no	up	0.93	4.15	2.04	0.00364	0.0202	yes	up	MFS multidrug transporter [Aspergillus ruber CBS 135680]	_	Synaptic vesicle transporter SVOP and related transporters	_
g569	1246.33	2775.04	1.15	0.0436	0.204	no	up	1288.46	1611.31	0.32	0.744	0.962	no	up	1288.46	1179.56	-0.13	0.73	1	no	down	1288.46	2631.45	1.03	0.122	0.29	no	up	40S ribosomal protein S15 [Aspergillus ruber CBS 135680]	_	40S ribosomal protein S15	RP-S15e, RPS15
g7053	383.9	851.7	1.15	0.0444	0.207	no	up	406.69	471.74	0.21	0.872	0.987	no	up	406.69	254.38	-0.68	0.238	0.834	no	down	406.69	1100.88	1.44	0.0321	0.113	no	up	SUN-domain-containing protein [Aspergillus ruber CBS 135680]	_	Afu7g05450 (Alt. Locus), SUN domain protein (Uth1), putative, similar to UTH1 (GI:6322895) ( [...]	SUN
g3645	100.86	223.77	1.15	0.0446	0.208	no	up	77.68	118.33	0.61	0.448	0.857	no	up	77.68	99.43	0.36	0.694	1	no	up	77.68	211.71	1.45	0.0311	0.111	no	up	putative Hsp70 chaperone [Aspergillus ruber CBS 135680]	_	Hsp70 chaperone (BiP), putative	_
g7990	341.43	757.07	1.15	0.0446	0.208	no	up	46.9	8.97	-2.37	0.000345	0.00829	yes	down	46.9	11.84	-1.98	0.00235	0.0355	yes	down	46.9	648.75	3.79	2.18e-07	4e-06	yes	up	hypothetical protein EURHEDRAFT_381905 [Aspergillus ruber CBS 135680]	_	_	_
g2165	27.94	62.21	1.15	0.0448	0.208	no	up	14.64	39.1	1.41	0.0511	0.314	no	up	14.64	13.48	-0.12	0.745	1	no	down	14.64	39.79	1.44	0.0331	0.116	no	up	Mak16 protein [Aspergillus ruber CBS 135680]	_	Ribosomal large subunit biogenesis protein MAK16, putative	MAK16
g3151	77.93	172.65	1.15	0.0449	0.208	no	up	38.44	46.95	0.29	0.785	0.974	no	up	38.44	109.52	1.51	0.0343	0.279	no	up	38.44	314.64	3.03	1.81e-05	0.000212	yes	up	cytochrome P450 61 [Aspergillus ruber CBS 135680]	_	Cytochrome P450 61	ERG5
g7861	19.2	42.84	1.15	0.045	0.208	no	up	11.05	22.64	1.03	0.167	0.595	no	up	11.05	17.29	0.64	0.412	0.967	no	up	11.05	33.14	1.58	0.0201	0.0797	no	up	hypothetical protein EURHEDRAFT_481514 [Aspergillus ruber CBS 135680]	_	Putative uncharacterized protein	NDUFAF6
g744	22.67	50.33	1.15	0.0456	0.21	no	up	20.98	35.25	0.75	0.334	0.789	no	up	20.98	16.93	-0.31	0.539	1	no	down	20.98	31.38	0.58	0.388	0.608	no	up	serine/threonine-protein kinase rio2 [Aspergillus ruber CBS 135680]	_	Contig An18c0080, complete genome	RIOK2
g7229	9.37	20.88	1.15	0.0481	0.218	no	up	22.15	16.97	-0.38	0.463	0.863	no	down	22.15	12.37	-0.84	0.162	0.695	no	down	22.15	14.95	-0.56	0.388	0.608	no	down	hypothetical protein EURHEDRAFT_416292 [Aspergillus ruber CBS 135680]	_	_	_
g7488	1.03	2.41	1.15	0.129	0.408	no	up	0.82	1.08	0.36	0.876	0.987	no	up	0.82	0.09	0	1	1	no	no change	0.82	0.09	0	1	1	no	no change	citrate synthase [Aspergillus ruber CBS 135680]	_	_	_
g5076	0.73	1.74	1.15	0.148	0.441	no	up	0.18	0.38	0	1	1	no	no change	0.18	0.52	0	1	1	no	no change	0.18	1.31	0	1	1	no	no change	hypothetical protein NFIA_080510 [Neosartorya fischeri NRRL 181]	_	Putative uncharacterized protein	_
g5924	151.9	335.86	1.14	0.0456	0.21	no	up	106.93	111.76	0.06	0.946	0.997	no	up	106.93	198.38	0.89	0.229	0.821	no	up	106.93	258.9	1.27	0.0569	0.171	no	up	adenylsulfate kinase [Aspergillus ruber CBS 135680]	_	Adenylyl-sulfate kinase (EC 2.7.1.25); Catalyzes the synthesis of activated sulfate (By simi [...]	cysC
g2138	138.29	305.47	1.14	0.0456	0.21	no	up	233.5	164.6	-0.5	0.35	0.801	no	down	233.5	316.67	0.44	0.603	1	no	up	233.5	344.19	0.56	0.401	0.619	no	up	putative biotin synthase [Aspergillus ruber CBS 135680]	_	biotin synthase (Eurofung)	bioB
g1605	16.76	37.12	1.14	0.0459	0.211	no	up	8.75	38.65	2.13	0.00289	0.0422	yes	up	8.75	9.9	0.18	0.91	1	no	up	8.75	25.01	1.5	0.0253	0.0945	no	up	putative DEAD box RNA helicase hela [Aspergillus ruber CBS 135680]	_	DEAD box RNA helicase HelA, putative	MSS116
g1656	1089.66	2399.87	1.14	0.046	0.212	no	up	1111.75	1494.09	0.43	0.627	0.93	no	up	1111.75	931.92	-0.25	0.59	1	no	down	1111.75	1913.24	0.78	0.239	0.454	no	up	putative 40S ribosomal protein S5 [Aspergillus ruber CBS 135680]	_	40S ribosomal protein S5, putative	RP-S5e, RPS5
g2799	17.25	38.09	1.14	0.0463	0.212	no	up	20.65	24.36	0.24	0.845	0.982	no	up	20.65	20.69	0	0.886	1	no	up	20.65	33.68	0.7	0.291	0.513	no	up	Rtt106-domain-containing protein [Aspergillus ruber CBS 135680]	_	Histone chaperone rtt106 ; Histones H3 and H4 chaperone involved in the nucleosome formation [...]	_
g6881	30.43	67.11	1.14	0.0463	0.213	no	up	38.38	42.19	0.14	0.967	1	no	up	38.38	42.53	0.15	0.941	1	no	up	38.38	93.36	1.28	0.0555	0.168	no	up	flavodoxin and radical SAM domain protein [Aspergillus ruber CBS 135680]	_	Similarity to hypothetical protein YPL206c - Saccharomyces cerevisiae	TYW1
g3604	176.97	388.91	1.14	0.0466	0.214	no	up	64.14	217.98	1.76	0.0136	0.129	no	up	64.14	113.34	0.82	0.272	0.873	no	up	64.14	253.21	1.98	0.00361	0.0201	yes	up	nucleolar protein 56 [Aspergillus oryzae RIB40]	_	Pre-rRNA processing nucleolar protein Sik1, putative	NOP56
g6397	70.82	156.06	1.14	0.0469	0.215	no	up	47.5	106.73	1.17	0.112	0.482	no	up	47.5	113.79	1.26	0.0816	0.482	no	up	47.5	170.12	1.84	0.00687	0.0342	yes	up	hypothetical protein EURHEDRAFT_403201 [Aspergillus ruber CBS 135680]	_	Mitochondrial large ribosomal subunit L49, putative	MRPL49, NOF1
g7034	27.82	61.23	1.14	0.0474	0.216	no	up	32.44	67.35	1.05	0.154	0.569	no	up	32.44	41.33	0.35	0.704	1	no	up	32.44	73.42	1.18	0.0785	0.214	no	up	putative ribose phosphate diphosphokinase Prs1 [Aspergillus ruber CBS 135680]	_	Ribose-phosphate pyrophosphokinase (EC 2.7.6.1)	PRPS, prsA
g1668	18.51	40.95	1.14	0.0475	0.216	no	up	10.23	24.76	1.27	0.0852	0.417	no	up	10.23	14.47	0.5	0.555	1	no	up	10.23	39.03	1.92	0.00514	0.0269	yes	up	hypothetical protein EURHEDRAFT_399327 [Aspergillus ruber CBS 135680]	_	Afu1g14580 (Alt. Locus), U3 small nucleolar RNA-associated protein Utp11, putative, similar [...]	UTP11
g1056	885.22	1939.95	1.13	0.0472	0.216	no	up	781.65	1063.3	0.44	0.609	0.921	no	up	781.65	798.66	0.03	0.918	1	no	up	781.65	1533.83	0.97	0.144	0.326	no	up	putative 40S ribosomal protein S4 [Aspergillus ruber CBS 135680]	_	40S ribosomal protein S4, putative	RP-S4e, RPS4
g3538	13.24	29.05	1.13	0.0478	0.217	no	up	15.29	18.52	0.27	0.802	0.975	no	up	15.29	15.64	0.03	0.922	1	no	up	15.29	35.17	1.2	0.073	0.204	no	up	hypothetical protein EURHEDRAFT_409603 [Aspergillus ruber CBS 135680]	_	_	_
g6353	68.46	149.75	1.13	0.048	0.218	no	up	13.83	44.98	1.69	0.018	0.158	no	up	13.83	51.66	1.89	0.00779	0.0917	no	up	13.83	59.28	2.09	0.00222	0.0134	yes	up	putative pyruvate decarboxylase [Aspergillus ruber CBS 135680]	_	Pyruvate decarboxylase	E4.1.1.1, pdc
g7340	32.13	70.51	1.13	0.048	0.218	no	up	56.3	46.86	-0.26	0.571	0.913	no	down	56.3	33.88	-0.73	0.209	0.784	no	down	56.3	59.77	0.09	0.907	0.961	no	up	hypothetical protein EURHEDRAFT_528405 [Aspergillus ruber CBS 135680]	_	Pc22g14360	_
g5735	63.6	138.9	1.13	0.0484	0.22	no	up	42.18	92.06	1.12	0.125	0.505	no	up	42.18	62.1	0.56	0.485	0.988	no	up	42.18	103.9	1.3	0.0523	0.161	no	up	nonsense-mediated mRNA decay protein 3 [Aspergillus ruber CBS 135680]	_	Afu2g16750 (Alt. Locus), nonsense-mediated mRNA decay protein 3	NMD3
g3173	35.04	76.83	1.13	0.0485	0.22	no	up	18.82	43.07	1.19	0.105	0.466	no	up	18.82	31.54	0.74	0.334	0.926	no	up	18.82	59.93	1.67	0.014	0.0601	no	up	50S ribosomal protein YmL27 [Aspergillus ruber CBS 135680]	_	50S ribosomal protein YmL27	MRPL41
g6712	49.82	109.02	1.13	0.0496	0.223	no	up	18.02	40.94	1.18	0.112	0.482	no	up	18.02	66.65	1.88	0.00891	0.102	no	up	18.02	90.43	2.32	0.000842	0.00602	yes	up	hypothetical protein EURHEDRAFT_205602 [Aspergillus ruber CBS 135680]	_	Predicted protein	_
g3528	12.23	26.96	1.13	0.0507	0.225	no	up	10.33	13.53	0.39	0.685	0.946	no	up	10.33	17.48	0.75	0.332	0.924	no	up	10.33	28.28	1.44	0.0345	0.119	no	up	hypothetical protein EURHEDRAFT_494709 [Aspergillus ruber CBS 135680]	_	Predicted protein	_
g3098	5.11	11.27	1.13	0.0541	0.234	no	up	5.09	8.33	0.7	0.386	0.825	no	up	5.09	7.12	0.48	0.584	1	no	up	5.09	14.52	1.49	0.0292	0.106	no	up	hypothetical protein EURHEDRAFT_480310 [Aspergillus ruber CBS 135680]	_	Putative uncharacterized protein	_
g1046	1536.83	3342.24	1.12	0.0491	0.222	no	up	1389.1	1910.66	0.46	0.592	0.917	no	up	1389.1	1301.76	-0.09	0.769	1	no	down	1389.1	2647.88	0.93	0.162	0.353	no	up	60S ribosomal protein L21 [Aspergillus terreus NIH2624]	_	60S ribosomal protein L21-A	RP-L21e, RPL21
g7993	64.54	140.71	1.12	0.0491	0.222	no	up	50.01	11.69	-2.09	0.00141	0.0247	yes	down	50.01	125.35	1.32	0.0651	0.42	no	up	50.01	175.77	1.81	0.00752	0.0367	yes	up	cora family metal ion transporter [Aspergillus ruber CBS 135680]	_	Magnesium and cobalt transport protein and translocase of inner mitochondrial membrane, putative	_
g567	98.87	215.08	1.12	0.0491	0.222	no	up	51.69	159.16	1.62	0.0235	0.192	no	up	51.69	90.09	0.8	0.285	0.891	no	up	51.69	169.71	1.71	0.0111	0.0502	no	up	large subunit of carbamoyl-phosphate synthase [Aspergillus ruber CBS 135680]	_	Carbamoyl-phosphate synthase, large subunit	carB, CPA2
g1611	11.6	25.36	1.12	0.0492	0.222	no	up	10.35	17.28	0.73	0.341	0.795	no	up	10.35	14.89	0.52	0.52	0.998	no	up	10.35	16.33	0.65	0.327	0.55	no	up	putative homeobox and C2H2 transcription factor [Aspergillus ruber CBS 135680]	_	Homeobox and C2H2 transcription factor, putative	_
g7794	129.29	281.79	1.12	0.0493	0.222	no	up	66.09	178.8	1.43	0.0471	0.299	no	up	66.09	78.02	0.24	0.833	1	no	up	66.09	166.24	1.33	0.0481	0.152	no	up	putative ribosome biogenesis protein nop10 [Aspergillus ruber CBS 135680]	_	Pc22g13990	NOP10, NOLA3
g5648	296.45	643.72	1.12	0.0494	0.222	no	up	284.14	466.53	0.72	0.355	0.804	no	up	284.14	309.43	0.12	0.97	1	no	up	284.14	469.23	0.72	0.276	0.496	no	up	citrate synthase [Aspergillus ruber CBS 135680]	_	ATP-citrate lyase	ACLY
g8051	27.68	60.26	1.12	0.0495	0.222	no	up	0.84	79.41	6.4	2.07e-14	4.1e-11	yes	up	0.84	26.29	4.81	7.53e-10	1.15e-07	yes	up	0.84	31.8	5.08	7.8e-11	2.72e-09	yes	up	putative MFS transporter [Aspergillus ruber CBS 135680]	_	Pc21g13040	_
g2142	615.1	1334.65	1.12	0.0496	0.223	no	up	639.99	823.06	0.36	0.698	0.949	no	up	639.99	516.98	-0.31	0.535	1	no	down	639.99	1102.07	0.78	0.238	0.454	no	up	hypothetical protein EURHEDRAFT_410518 [Aspergillus ruber CBS 135680]	_	ribosomal protein L14 (AFU_orthologue; AFUA_6G03830)	RP-L14e, RPL14
g986	1240.91	2690.52	1.12	0.0497	0.223	no	up	724.35	944.32	0.38	0.676	0.943	no	up	724.35	1895.22	1.39	0.0521	0.364	no	up	724.35	4393.8	2.6	0.000182	0.00159	yes	up	plasma-membrane proton-e [Aspergillus ruber CBS 135680]	_	Plasma membrane H+-ATPase Pma1	E3.6.3.6
g7408	109.05	236.53	1.12	0.0498	0.223	no	up	251.78	297.07	0.24	0.843	0.982	no	up	251.78	57.39	-2.13	0.0011	0.0187	yes	down	251.78	161.81	-0.64	0.325	0.548	no	down	FAD/NAD(P)-binding domain-containing protein [Aspergillus ruber CBS 135680]	_	Pc22g24560	_
g3575	19.27	41.99	1.12	0.0498	0.223	no	up	15.41	26.05	0.75	0.327	0.785	no	up	15.41	15.34	-0.01	0.874	1	no	down	15.41	38.72	1.32	0.0482	0.152	no	up	putative exosome complex exonuclease Rrp6 [Aspergillus ruber CBS 135680]	_	Afu3g09880 (Alt. Locus), exosome complex exonuclease Rrp6, putative, similar to Exonuclease [...]	RRP6, EXOSC10
g3103	1288.7	2793.28	1.12	0.0499	0.223	no	up	1267.69	1747.24	0.46	0.589	0.916	no	up	1267.69	1024.72	-0.31	0.536	1	no	down	1267.69	2380.85	0.91	0.172	0.368	no	up	40S ribosomal protein S19 [Aspergillus ruber CBS 135680]	_	40S ribosomal protein S19 (Eurofung)	RP-S19e, RPS19
g1787	23.07	50.12	1.12	0.0502	0.224	no	up	13.43	20.77	0.63	0.432	0.849	no	up	13.43	9.76	-0.46	0.401	0.963	no	down	13.43	21.16	0.65	0.329	0.552	no	up	MFS general substrate transporter [Aspergillus ruber CBS 135680]	_	Pc22g07550	_
g3471	5.48	12.07	1.12	0.0507	0.225	no	up	11.3	16.67	0.56	0.495	0.881	no	up	11.3	7.76	-0.54	0.338	0.927	no	down	11.3	15.23	0.43	0.526	0.727	no	up	hypothetical protein EURHEDRAFT_479860 [Aspergillus ruber CBS 135680]	_	Putative uncharacterized protein	_
g2974	11.98	26.12	1.12	0.0544	0.234	no	up	7.77	17.52	1.16	0.121	0.498	no	up	7.77	14.85	0.93	0.222	0.807	no	up	7.77	25.27	1.69	0.0141	0.0604	no	up	hypothetical protein EURHEDRAFT_419778, partial [Aspergillus ruber CBS 135680]	_	Sreptomyces cyclase/dehydrase family protein	COQ10
g3194	12.48	27.29	1.12	0.0552	0.237	no	up	9.2	14.01	0.6	0.475	0.871	no	up	9.2	20.01	1.11	0.138	0.65	no	up	9.2	22.47	1.28	0.0621	0.182	no	up	putative HIT finger domain protein [Aspergillus ruber CBS 135680]	_	_	_
g6419	2.96	6.57	1.12	0.0747	0.288	no	up	4.41	8.37	0.91	0.255	0.712	no	up	4.41	4.38	-0.01	0.884	1	no	down	4.41	9.5	1.09	0.127	0.298	no	up	hypothetical protein EURHEDRAFT_430444, partial [Aspergillus ruber CBS 135680]	_	_	_
g1945	0.29	0.75	1.12	0.125	0.4	no	up	0.16	0.7	1.62	0.0721	0.381	no	up	0.16	0.4	0	1	1	no	no change	0.16	0.36	0	1	1	no	no change	hypothetical protein EURHEDRAFT_515339 [Aspergillus ruber CBS 135680]	_	Remark: the protein seems 80 amino acids too long. Precursor	_
g2198	10.57	22.98	1.11	0.0504	0.224	no	up	5.2	14.1	1.42	0.0472	0.3	no	up	5.2	7.87	0.59	0.451	0.977	no	up	5.2	17.11	1.7	0.0115	0.0514	no	up	P-loop containing nucleoside triphosphate hydrolase protein [Aspergillus ruber CBS 135680]	_	DEAH-box RNA helicase (Dhr1), putative	DHX37, DHR1
g1858	81.32	176.01	1.11	0.0506	0.225	no	up	70.2	99.23	0.5	0.552	0.904	no	up	70.2	76.63	0.13	0.967	1	no	up	70.2	89.53	0.35	0.603	0.783	no	up	hypothetical protein EURHEDRAFT_438177, partial [Aspergillus ruber CBS 135680]	_	C2H2 transcription factor, putativePossible zinc finger proteinPutative zinc finger transcri [...]	_
g434	20.89	45.32	1.11	0.0507	0.225	no	up	20.07	19.98	-0.01	0.861	0.984	no	down	20.07	29.21	0.54	0.503	0.991	no	up	20.07	44.75	1.15	0.0844	0.226	no	up	DUF726-domain-containing protein [Aspergillus ruber CBS 135680]	_	Afu2g12860 (Alt. Locus), DUF726 domain protein, contains a DUF726 domain	_
g7537	26.31	57.01	1.11	0.0508	0.225	no	up	48.48	17.38	-1.47	0.0183	0.16	no	down	48.48	25.59	-0.92	0.124	0.613	no	down	48.48	27.95	-0.79	0.224	0.436	no	down	hypothetical protein EURHEDRAFT_417198 [Aspergillus ruber CBS 135680]	_	BCS1-like ATPase, putative (AFU_orthologue; AFUA_2G14760)	BCS1
g3475	98.24	212.14	1.11	0.0508	0.225	no	up	37.89	154.48	2.02	0.00456	0.0582	no	up	37.89	107.19	1.5	0.0354	0.283	no	up	37.89	181.56	2.26	0.000995	0.00691	yes	up	putative eukaryotic translation initiation factor subunit [Aspergillus ruber CBS 135680]	_	Protein TIF31 homolog	TIF31, CLU1
g7407	32.53	70.43	1.11	0.051	0.225	no	up	55.17	202.09	1.87	0.00883	0.0942	no	up	55.17	22.3	-1.3	0.0358	0.285	no	down	55.17	54.8	-0.01	0.979	0.996	no	down	hypothetical protein EURHEDRAFT_167939 [Aspergillus ruber CBS 135680]	_	Putative uncharacterized protein	_
g8132	8.62	18.68	1.11	0.051	0.225	no	up	3.44	14.69	2.06	0.00373	0.0506	no	up	3.44	8.92	1.35	0.0584	0.392	no	up	3.44	25.58	2.86	4.43e-05	0.000463	yes	up	DNA/RNA polymerase [Aspergillus ruber CBS 135680]	_	DNA-directed RNA polymerase (EC 2.7.7.6); DNA-dependent RNA polymerase catalyzes the transcr [...]	POLRMT, RPO41
g6876	33.31	72	1.11	0.0512	0.226	no	up	35.09	38.58	0.14	0.967	1	no	up	35.09	44.08	0.33	0.726	1	no	up	35.09	52.57	0.58	0.383	0.603	no	up	hypothetical protein EURHEDRAFT_379431 [Aspergillus ruber CBS 135680]	_	Putative uncharacterized protein	UPF3, RENT3
g1479	37.06	80.1	1.11	0.0513	0.226	no	up	17.38	43.4	1.32	0.0694	0.373	no	up	17.38	21.11	0.28	0.784	1	no	up	17.38	60.4	1.79	0.00821	0.0395	yes	up	60S ribosome biogenesis protein Mak11 [Aspergillus ruber CBS 135680]	_	60S ribosome biogenesis protein Mak11, putative	MAK11, PAK1IP1
g5662	9.7	21.06	1.11	0.0514	0.226	no	up	10.09	14.84	0.55	0.499	0.882	no	up	10.09	25.59	1.33	0.0629	0.411	no	up	10.09	35.19	1.79	0.00811	0.0391	yes	up	hypothetical protein EURHEDRAFT_410951 [Aspergillus ruber CBS 135680]	_	_	_
g6069	11.61	25.12	1.11	0.0516	0.227	no	up	9.16	16.26	0.82	0.278	0.739	no	up	9.16	10.07	0.14	0.959	1	no	up	9.16	16.59	0.85	0.201	0.408	no	up	hypothetical protein EURHEDRAFT_414417 [Aspergillus ruber CBS 135680]	_	Putative uncharacterized protein	_
g7416	20.35	44.17	1.11	0.0518	0.227	no	up	26.31	26.41	0.01	0.881	0.988	no	up	26.31	22.47	-0.23	0.626	1	no	down	26.31	38.25	0.54	0.424	0.641	no	up	Pre-rRNA-processing protein ipi1 [Aspergillus ruber CBS 135680]	_	Pre-rRNA-processing protein ipi1 ; Involved inthe processing of ITS2 sequences from 35S pre- [...]	IPI1, TEX10
g482	14.27	30.97	1.11	0.0522	0.228	no	up	11.44	23.06	1	0.177	0.614	no	up	11.44	24.5	1.09	0.136	0.647	no	up	11.44	46.96	2.03	0.00309	0.0177	yes	up	hypothetical protein EURHEDRAFT_409927 [Aspergillus ruber CBS 135680]	_	_	_
g2772	19.15	41.41	1.11	0.0525	0.229	no	up	6.82	25.65	1.9	0.0087	0.0933	no	up	6.82	21.39	1.63	0.0231	0.209	no	up	6.82	42.06	2.61	0.000201	0.00175	yes	up	DUF367-domain-containing protein [Aspergillus ruber CBS 135680]	_	RLI and DUF367 domain protein	TSR3
g6487	15.69	34.08	1.11	0.0527	0.229	no	up	14.97	34.75	1.21	0.0984	0.452	no	up	14.97	19.36	0.37	0.687	1	no	up	14.97	47.81	1.67	0.0139	0.0597	no	up	hypothetical protein EURHEDRAFT_449490 [Aspergillus ruber CBS 135680]	_	heme/steroid binding protein, putative (AFU_orthologue; AFUA_2G03880)	_
g4721	3.2	7	1.11	0.0595	0.25	no	up	15.88	4.06	-1.94	0.00307	0.0441	yes	down	15.88	16.19	0.03	0.917	1	no	up	15.88	5.9	-1.41	0.0357	0.122	no	down	putative threonine aldolase [Aspergillus ruber CBS 135680]	_	Threonine aldolase, putative	ltaE
g6146	8.69	18.81	1.11	0.0626	0.256	no	up	5.81	17.14	1.54	0.0419	0.278	no	up	5.81	8.72	0.58	0.509	0.993	no	up	5.81	14.33	1.29	0.0729	0.204	no	up	hypothetical protein EURHEDRAFT_448348 [Aspergillus ruber CBS 135680]	_	_	_
g3391	3.7	8.13	1.11	0.0664	0.267	no	up	2.06	2.68	0.36	0.776	0.971	no	up	2.06	2.85	0.45	0.689	1	no	up	2.06	21.52	3.32	9.65e-06	0.000119	yes	up	Cyanovirin-N [Aspergillus ruber CBS 135680]	_	_	_
g3712	1.11	2.5	1.1	0.0501	0.224	no	up	0.92	0.05	-2.77	4.45e-06	0.000282	yes	down	0.92	0.04	-2.87	3.06e-06	0.000142	yes	down	0.92	4.57	2.19	0.00108	0.00739	yes	up	acetyl-CoA synthetase-like protein [Aspergillus ruber CBS 135680]	_	Pc12g09980	_
g52	616.8	1322.16	1.1	0.0527	0.229	no	up	343.56	536.34	0.64	0.416	0.84	no	up	343.56	468.62	0.45	0.594	1	no	up	343.56	809.32	1.24	0.0643	0.186	no	up	hypothetical protein EURHEDRAFT_415910 [Aspergillus ruber CBS 135680]	_	_	_
g7839	48.76	104.71	1.1	0.053	0.23	no	up	30.49	48.94	0.68	0.386	0.825	no	up	30.49	36.83	0.27	0.793	1	no	up	30.49	77.21	1.34	0.0463	0.148	no	up	PEBP-like protein [Aspergillus ruber CBS 135680]	_	Putative uncharacterized protein	MRPL35
g5669	46.25	99.02	1.1	0.0536	0.232	no	up	53.3	60.89	0.19	0.9	0.988	no	up	53.3	51.36	-0.05	0.818	1	no	down	53.3	113.23	1.09	0.104	0.262	no	up	longevity-assurance protein 1 [Aspergillus ruber CBS 135680]	_	Longevity-assurance protein 1	LAG1
g304	14.61	31.35	1.1	0.0539	0.233	no	up	12.1	17.29	0.51	0.54	0.901	no	up	12.1	23.89	0.98	0.184	0.742	no	up	12.1	35.03	1.53	0.0234	0.0894	no	up	mitochondrial amino-acid acetyltransferase [Aspergillus ruber CBS 135680]	_	Amino-acid acetyltransferase, mitochondrial Precursor (EC 2.3.1.1)(N-acetylglutamate synthas [...]	E2.3.1.1
g2233	4.76	10.31	1.1	0.0543	0.234	no	up	5.39	11.64	1.1	0.136	0.531	no	up	5.39	5.16	-0.06	0.816	1	no	down	5.39	33.97	2.63	0.000159	0.00143	yes	up	hypothetical protein EURHEDRAFT_466971 [Aspergillus ruber CBS 135680]	_	Predicted protein	_
g6799	26.93	57.74	1.1	0.055	0.237	no	up	28.92	38.29	0.4	0.656	0.937	no	up	28.92	34.8	0.27	0.802	1	no	up	28.92	62.15	1.1	0.101	0.257	no	up	RNA binding domain protein [Aspergillus ruber CBS 135680]	_	RNA binding domain protein	_
g5190	4.55	9.88	1.1	0.0555	0.237	no	up	3.15	10.88	1.76	0.0148	0.137	no	up	3.15	1.04	-1.51	0.02	0.187	no	down	3.15	1.45	-1.07	0.11	0.271	no	down	MFS general substrate transporter [Aspergillus ruber CBS 135680]	_	_	_
g6238	23.6	50.53	1.1	0.0558	0.238	no	up	5.99	60.38	3.31	9.55e-06	0.000536	yes	up	5.99	18.42	1.6	0.0294	0.249	no	up	5.99	20.1	1.73	0.013	0.0569	no	up	hypothetical protein EURHEDRAFT_414890 [Aspergillus ruber CBS 135680]	_	Putative uncharacterized protein	_
g3274	25.19	54.05	1.1	0.0561	0.239	no	up	22.96	25.34	0.14	0.965	1	no	up	22.96	36.7	0.67	0.39	0.961	no	up	22.96	58.6	1.35	0.0465	0.148	no	up	acyl-CoA N-acyltransferase [Aspergillus ruber CBS 135680]	_	N-acetyltransferase (Nat5), putative	NAA20, NAT3
g3576	6.05	13.05	1.1	0.0648	0.262	no	up	4.49	6.89	0.61	0.487	0.875	no	up	4.49	5.67	0.33	0.766	1	no	up	4.49	10.9	1.26	0.0757	0.209	no	up	PTPLA-domain-containing protein [Aspergillus ruber CBS 135680]	_	Putative uncharacterized protein	PHS1, PAS2
g6942	53.39	113.91	1.09	0.0539	0.233	no	up	26.94	75.17	1.48	0.0394	0.268	no	up	26.94	30.42	0.17	0.907	1	no	up	26.94	123.64	2.19	0.00134	0.0088	yes	up	bifunctional pyrimidine biosynthesis protein [Aspergillus ruber CBS 135680]	_	Bifunctional pyrimidine biosynthesis protein (PyrABCN), putative	URA2
g161	11.46	24.57	1.09	0.054	0.233	no	up	12.73	20.38	0.67	0.389	0.826	no	up	12.73	25.71	1.01	0.167	0.707	no	up	12.73	42.26	1.72	0.0107	0.0486	yes	up	chitin synthase 2 [Aspergillus ruber CBS 135680]	_	Chitin synthase 1 Fragment (EC 2.4.1.16)(Chitin-UDP acetyl-glucosaminyl transferase 1)(Class [...]	CHS1
g2675	769.78	1641.71	1.09	0.054	0.233	no	up	642.73	873.67	0.44	0.61	0.921	no	up	642.73	638.54	-0.01	0.869	1	no	down	642.73	1472.72	1.2	0.0731	0.204	no	up	ribosomal protein S3 [Aspergillus ruber CBS 135680]	_	40S ribosomal protein S3, putative	RP-S3e, RPS3
g2238	14.43	30.87	1.09	0.0546	0.235	no	up	8.52	21.72	1.34	0.0635	0.357	no	up	8.52	12.97	0.6	0.443	0.975	no	up	8.52	24.73	1.53	0.0232	0.0891	no	up	Pet127-domain-containing protein [Aspergillus ruber CBS 135680]	_	Putative uncharacterized protein	_
g7440	22.54	48.23	1.09	0.0553	0.237	no	up	12.71	17.49	0.46	0.601	0.918	no	up	12.71	19.11	0.58	0.465	0.981	no	up	12.71	37.96	1.57	0.0207	0.0812	no	up	peptidyl prolyl cis-trans isomerase (CypC), putative [Aspergillus clavatus NRRL 1]	_	Peptidyl-prolyl cis-trans isomerase (EC 5.2.1.8); PPIases accelerate the folding of proteins [...]	PPIL1
g4570	13.37	28.49	1.09	0.0555	0.237	no	up	8.35	10.05	0.26	0.811	0.976	no	up	8.35	12.15	0.54	0.503	0.991	no	up	8.35	53.16	2.66	0.000136	0.00124	yes	up	putative GTPase activating protein [Aspergillus ruber CBS 135680]	_	Afu6g13850 (Alt. Locus), GTPase activating protein (Evi5), putative, GB:AAC16031.1: EVI-5 ho [...]	_
g42	11.41	24.35	1.09	0.0562	0.24	no	up	59.21	22.86	-1.37	0.0268	0.209	no	down	59.21	60.03	0.02	0.905	1	no	up	59.21	47.85	-0.31	0.631	0.801	no	down	copper amine oxidase [Aspergillus ruber CBS 135680]	_	Copper amine oxidase	AOC3, AOC2, tynA
g3159	1420.52	3001.33	1.08	0.0565	0.241	no	up	1322.69	1510.29	0.19	0.9	0.988	no	up	1322.69	1326.16	0	0.885	1	no	up	1322.69	2445.35	0.89	0.182	0.382	no	up	ubiquitin-60S ribosomal protein L40 fusion protein [Aspergillus oryzae RIB40]	_	Ubiquitin UbiA, putative	RP-L40e, RPL40
g2843	13.37	28.44	1.08	0.0567	0.242	no	up	26	24.59	-0.08	0.775	0.971	no	down	26	21.58	-0.27	0.578	1	no	down	26	40.18	0.63	0.347	0.569	no	up	putative cora family metal ion transporter [Aspergillus ruber CBS 135680]	_	_	MID1
g3262	1049.31	2213.06	1.08	0.0569	0.242	no	up	844.58	980.99	0.22	0.87	0.986	no	up	844.58	772.95	-0.13	0.729	1	no	down	844.58	1801.59	1.09	0.101	0.257	no	up	60S acidic ribosomal protein P0 [Aspergillus ruber CBS 135680]	_	Contig An01c0150, complete genome	RP-LP0, RPLP0
g2969	14.15	30.03	1.08	0.0574	0.243	no	up	13.28	23.67	0.83	0.276	0.737	no	up	13.28	15.38	0.21	0.868	1	no	up	13.28	26.42	0.99	0.141	0.321	no	up	methyltransferase [Aspergillus ruber CBS 135680]	_	Actin binding protein, putative	ABP140
g2718	9.9	21.06	1.08	0.0606	0.252	no	up	10.23	16	0.64	0.427	0.846	no	up	10.23	8.98	-0.19	0.671	1	no	down	10.23	16.15	0.65	0.34	0.562	no	up	putative RNA polymerase III subunit C11 [Aspergillus ruber CBS 135680]	_	DNA-directed RNA polymerase subunit	RPC11, POLR3K
g673	7.82	16.69	1.08	0.0614	0.254	no	up	5.72	14.25	1.3	0.08	0.403	no	up	5.72	5.92	0.05	0.949	1	no	up	5.72	5.83	0.03	0.983	0.998	no	up	tRNA-splicing endonuclease subunit sen34 [Aspergillus ruber CBS 135680]	_	tRNA-splicing endonuclease subunit sen34	TSEN34
g526	9.29	19.77	1.08	0.0618	0.255	no	up	5.3	24.47	2.19	0.00298	0.0429	yes	up	5.3	9.95	0.9	0.245	0.845	no	up	5.3	14.58	1.44	0.0389	0.13	no	up	hypothetical protein EURHEDRAFT_450221 [Aspergillus ruber CBS 135680]	_	_	_
g5266	14.39	30.62	1.08	0.0744	0.287	no	up	7.4	18.69	1.33	0.103	0.462	no	up	7.4	18.65	1.32	0.0923	0.519	no	up	7.4	24.98	1.74	0.0174	0.0716	no	up	zf-CSL-domain-containing protein [Aspergillus ruber CBS 135680]	_	CSL family zinc fnger-containing protein	KTI11, DPH3
g4853	331.21	697.78	1.07	0.0573	0.243	no	up	44.62	57.2	0.36	0.705	0.95	no	up	44.62	482.46	3.43	3.08e-06	0.000142	yes	up	44.62	760.15	4.09	3.42e-08	7.57e-07	yes	up	thermophilic desulfurizing enzyme family protein [Aspergillus ruber CBS 135680]	_	_	E1.3.99.-
g5247	60.74	127.94	1.07	0.058	0.245	no	up	38.18	67.67	0.82	0.279	0.74	no	up	38.18	62.65	0.71	0.351	0.933	no	up	38.18	95.71	1.32	0.0484	0.152	no	up	hypothetical protein EURHEDRAFT_407829 [Aspergillus ruber CBS 135680]	_	Putative uncharacterized protein	RP-L28, MRPL28, rpmB
g3043	65.76	138.08	1.07	0.0588	0.247	no	up	46.88	53.75	0.2	0.894	0.988	no	up	46.88	68.39	0.54	0.498	0.99	no	up	46.88	102.56	1.13	0.0914	0.24	no	up	DUF757-domain-containing protein [Aspergillus ruber CBS 135680]	_	DUF757 domain protein	_
g2282	44.46	93.54	1.07	0.0588	0.247	no	up	32.49	52.13	0.68	0.386	0.825	no	up	32.49	85.74	1.4	0.0516	0.362	no	up	32.49	105.97	1.7	0.0119	0.0529	no	up	C-5 sterol desaturase [Aspergillus ruber CBS 135680]	_	C-5 sterol desaturase	SC5DL, ERG3
g1618	6.38	13.47	1.07	0.0603	0.252	no	up	5.26	19.43	1.87	0.0092	0.0968	no	up	5.26	10.59	1	0.174	0.722	no	up	5.26	46.01	3.1	1.23e-05	0.00015	yes	up	putative MFS multidrug transporter [Aspergillus ruber CBS 135680]	_	Putative uncharacterized protein	_
g2285	12.34	26.08	1.07	0.0603	0.252	no	up	9.86	19.77	1	0.182	0.62	no	up	9.86	9.65	-0.03	0.852	1	no	down	9.86	23.78	1.26	0.0615	0.181	no	up	putative mitochondrial folate carrier protein Flx1 [Aspergillus ruber CBS 135680]	_	Mitochondrial folate carrier protein Flx1, putative	SLC25A32, MFT
g1409	10.78	22.81	1.07	0.0622	0.255	no	up	9.64	12.27	0.34	0.729	0.956	no	up	9.64	8.26	-0.22	0.639	1	no	down	9.64	16.71	0.79	0.246	0.462	no	up	hypothetical protein EURHEDRAFT_412717 [Aspergillus ruber CBS 135680]	_	Similarity to hypothetical protein SPAC577.03c - Schizosaccharomyces pombe	POLD2
g4594	7.85	16.57	1.07	0.0636	0.259	no	up	15.86	27.18	0.77	0.316	0.775	no	up	15.86	2.39	-2.68	0.000114	0.00294	yes	down	15.86	6.06	-1.37	0.0413	0.135	no	down	putative RTA1 domain protein [Aspergillus ruber CBS 135680]	_	RTA1 domain protein, putative	_
g5318	6.19	13.15	1.07	0.065	0.263	no	up	15.72	17.22	0.13	0.976	1	no	up	15.72	17.66	0.17	0.925	1	no	up	15.72	15.82	0.01	1	1	no	up	hypothetical protein EURHEDRAFT_373809 [Aspergillus ruber CBS 135680]	_	_	_
g7100	34.57	72.34	1.06	0.0595	0.25	no	up	45.27	20.52	-1.14	0.0601	0.346	no	down	45.27	24.75	-0.87	0.143	0.657	no	down	45.27	40.43	-0.16	0.793	0.899	no	down	hypothetical protein EURHEDRAFT_448965 [Aspergillus ruber CBS 135680]	_	_	_
g2497	864.41	1806.13	1.06	0.0596	0.25	no	up	536.1	1144.93	1.09	0.135	0.528	no	up	536.1	862.38	0.69	0.371	0.949	no	up	536.1	1335.43	1.32	0.049	0.154	no	up	nascent polypeptide-associated complex subunit beta [Aspergillus ruber CBS 135680]	_	Nascent polypeptide-associated complex (NAC) subunit, putative	EGD1, BTF3
g6476	180.97	378.1	1.06	0.0597	0.25	no	up	217.71	208.65	-0.06	0.795	0.975	no	down	217.71	256.09	0.23	0.836	1	no	up	217.71	394.34	0.86	0.198	0.404	no	up	hypothetical protein EURHEDRAFT_413102 [Aspergillus ruber CBS 135680]	_	Predicted transporter	ABCF2
g3086	89.74	187.72	1.06	0.0598	0.25	no	up	94.59	89.13	-0.09	0.767	0.968	no	down	94.59	114.72	0.28	0.784	1	no	up	94.59	179.3	0.92	0.166	0.36	no	up	putative GTP binding protein [Aspergillus ruber CBS 135680]	_	GTP binding protein, putative	K06944
g3479	18.15	38.02	1.06	0.0599	0.251	no	up	13.61	2.53	-2.38	0.000328	0.00798	yes	down	13.61	15.95	0.23	0.846	1	no	up	13.61	32.06	1.23	0.0659	0.19	no	up	putative phosphoketolase [Aspergillus ruber CBS 135680]	_	Contig An02c0190, complete genome. (EC 2.2.1.1)	xfp, xpk
g7941	13.04	27.33	1.06	0.0604	0.252	no	up	20.85	21.04	0.01	0.885	0.988	no	up	20.85	27.69	0.41	0.638	1	no	up	20.85	44.13	1.08	0.106	0.266	no	up	hypothetical protein EURHEDRAFT_483322, partial [Aspergillus ruber CBS 135680]	_	_	_
g3180	134.72	281.14	1.06	0.0605	0.252	no	up	120.23	174.08	0.53	0.518	0.891	no	up	120.23	121.48	0.01	0.9	1	no	up	120.23	236.25	0.97	0.144	0.326	no	up	hypothetical protein EURHEDRAFT_413262 [Aspergillus ruber CBS 135680]	_	Predicted protein	_
g5581	87.62	182.63	1.06	0.0606	0.252	no	up	70.71	107.66	0.61	0.449	0.857	no	up	70.71	71.6	0.02	0.903	1	no	up	70.71	149.66	1.08	0.105	0.264	no	up	putative eukaryotic translation initiation factor 3 subunit EifCf [Aspergillus ruber CBS 135680]	_	Eukaryotic translation initiation factor 3 subunit F (eIF3f); Component of the eukaryotic tr [...]	EIF3F
g5287	23.46	49.06	1.06	0.0608	0.253	no	up	15.82	25.34	0.68	0.389	0.826	no	up	15.82	17.47	0.14	0.95	1	no	up	15.82	107.61	2.76	8.22e-05	0.000796	yes	up	putative C2H2 finger domain protein [Aspergillus ruber CBS 135680]	_	C2H2 finger domain protein, putative	_
g8191	70.38	146.6	1.06	0.0608	0.253	no	up	79.16	97.94	0.31	0.763	0.968	no	up	79.16	70.48	-0.17	0.685	1	no	down	79.16	132.02	0.74	0.268	0.486	no	up	putative eukaryotic translation initiation factor 3 subunit EifCl [Aspergillus ruber CBS 135680]	_	Eukaryotic translation initiation factor 3 subunit L (eIF3l); Component of the eukaryotic tr [...]	EIF3L
g3944	53.98	112.53	1.06	0.0609	0.253	no	up	71.23	62.58	-0.19	0.653	0.936	no	down	71.23	71.67	0.01	0.892	1	no	up	71.23	116.73	0.71	0.285	0.506	no	up	hypothetical protein EURHEDRAFT_514932 [Aspergillus ruber CBS 135680]	_	Predicted protein	_
g1140	29.31	61.14	1.06	0.061	0.253	no	up	16.1	41.1	1.35	0.0625	0.354	no	up	16.1	24.97	0.63	0.419	0.969	no	up	16.1	44.47	1.46	0.03	0.108	no	up	terpenoid synthase [Aspergillus ruber CBS 135680]	_	Afu3g06120 (Alt. Locus), hexaprenyl pyrophosphate synthetase Coq1, putative, similar to hexa [...]	hexPS, COQ1
g7896	19.89	41.54	1.06	0.0618	0.255	no	up	15.29	31.45	1.04	0.161	0.583	no	up	15.29	35.86	1.22	0.09	0.511	no	up	15.29	93.02	2.6	0.000192	0.00168	yes	up	hypothetical protein EURHEDRAFT_404571 [Aspergillus ruber CBS 135680]	_	_	_
g3562	202.29	420.55	1.06	0.0618	0.255	no	up	294.87	263.78	-0.16	0.682	0.946	no	down	294.87	334.37	0.18	0.9	1	no	up	294.87	302.34	0.04	0.968	0.99	no	up	hypothetical protein EURHEDRAFT_409570 [Aspergillus ruber CBS 135680]	_	Putative uncharacterized protein	_
g5989	65.16	135.57	1.06	0.062	0.255	no	up	43.33	86.47	1	0.181	0.618	no	up	43.33	69.28	0.68	0.383	0.958	no	up	43.33	116.01	1.42	0.035	0.12	no	up	hypothetical protein EURHEDRAFT_414527 [Aspergillus ruber CBS 135680]	_	Putative uncharacterized protein	_
g4131	12.57	26.3	1.06	0.0637	0.259	no	up	9.98	12.03	0.27	0.816	0.977	no	up	9.98	17.18	0.78	0.312	0.91	no	up	9.98	27.24	1.44	0.0345	0.119	no	up	acetate non-utilizing protein 9, mitochondrial [Aspergillus ruber CBS 135680]	_	Acetate non-utilizing protein 9, mitochondrial	_
g5775	16.11	33.65	1.06	0.0663	0.267	no	up	6.33	80.75	3.65	1.61e-06	0.00012	yes	up	6.33	12.23	0.94	0.232	0.825	no	up	6.33	62.19	3.28	8.01e-06	0.000101	yes	up	hypothetical protein EURHEDRAFT_452636 [Aspergillus ruber CBS 135680]	_	Putative uncharacterized protein	_
g7092	4.85	10.19	1.06	0.0726	0.283	no	up	9.87	6.9	-0.51	0.367	0.812	no	down	9.87	11.42	0.21	0.872	1	no	up	9.87	18.81	0.92	0.173	0.369	no	up	hypothetical protein EURHEDRAFT_448831 [Aspergillus ruber CBS 135680]	_	_	_
g2121	0.79	1.76	1.06	0.219	0.54	no	up	2.44	0.69	-1.68	0.0639	0.358	no	down	2.44	1.25	-0.91	0.233	0.825	no	down	2.44	2.89	0.24	0.795	0.9	no	up	hypothetical protein ASPNIDRAFT_39136 [Aspergillus niger ATCC 1015]	_	Function: 2 (EC 1.13.11.-)	_
g8103	397.73	826.22	1.05	0.0613	0.254	no	up	1604.91	951.09	-0.75	0.189	0.632	no	down	1604.91	578.03	-1.47	0.0188	0.177	no	down	1604.91	538.16	-1.58	0.0178	0.0728	no	down	hypothetical protein EURHEDRAFT_408887 [Aspergillus ruber CBS 135680]	_	_	_
g6790	24.33	50.63	1.05	0.0615	0.255	no	up	20.8	35.57	0.77	0.313	0.774	no	up	20.8	22.4	0.11	0.991	1	no	up	20.8	45.45	1.12	0.0919	0.24	no	up	putative mitochondrion biogenesis protein [Aspergillus ruber CBS 135680]	_	Mitochondrion biogenesis protein (Mdm31), putative	MDM31
g3172	67.35	139.75	1.05	0.0617	0.255	no	up	63.15	93.28	0.56	0.489	0.877	no	up	63.15	66.06	0.06	0.959	1	no	up	63.15	118.58	0.91	0.172	0.368	no	up	HECT-domain-containing protein [Aspergillus ruber CBS 135680]	_	Afu1g04210 (Alt. Locus), IQ and HECT domain protein	UBE3C
g7389	42.54	88.47	1.05	0.0618	0.255	no	up	21.23	49.87	1.23	0.0923	0.437	no	up	21.23	50.43	1.24	0.0847	0.493	no	up	21.23	84.88	1.99	0.00348	0.0195	yes	up	putative GTP cyclohydrolase I [Aspergillus ruber CBS 135680]	_	GTP cyclohydrolase I, putative	GCH1, folE
g889	427.2	885.57	1.05	0.0619	0.255	no	up	361.77	427.95	0.24	0.838	0.982	no	up	361.77	340.38	-0.09	0.776	1	no	down	361.77	682.77	0.92	0.168	0.363	no	up	hypothetical protein PDE_01963 [Penicillium oxalicum 114-2]	_	Pc20g06740	EIF4A
g4554	111.15	230.4	1.05	0.0621	0.255	no	up	68.93	52.87	-0.38	0.454	0.86	no	down	68.93	90.8	0.4	0.648	1	no	up	68.93	261.06	1.92	0.00468	0.025	yes	up	hypothetical protein EURHEDRAFT_375722 [Aspergillus ruber CBS 135680]	_	_	rne
g6533	13.54	28.24	1.05	0.0625	0.256	no	up	14.49	19.51	0.43	0.628	0.93	no	up	14.49	18.14	0.32	0.734	1	no	up	14.49	48.18	1.73	0.0107	0.0489	yes	up	amino acid transporter [Aspergillus ruber CBS 135680]	_	Amino acid transporter	SLC38A11
g4851	67.41	139.3	1.05	0.0636	0.259	no	up	45.09	75.84	0.75	0.331	0.787	no	up	45.09	61.53	0.45	0.596	1	no	up	45.09	129.87	1.52	0.0235	0.0897	no	up	hypothetical protein EURHEDRAFT_415657 [Aspergillus ruber CBS 135680]	_	Putative uncharacterized protein	_
g2266	5.12	10.71	1.05	0.0636	0.259	no	up	4.86	12.22	1.31	0.0699	0.376	no	up	4.86	8.84	0.85	0.255	0.855	no	up	4.86	24.67	2.32	0.000764	0.00552	yes	up	putative amino acid transporter [Aspergillus ruber CBS 135680]	_	Putative uncharacterized protein	_
g1035	20.92	43.3	1.05	0.0639	0.26	no	up	24.51	35.8	0.54	0.508	0.886	no	up	24.51	26.41	0.11	0.99	1	no	up	24.51	71.37	1.54	0.0222	0.086	no	up	UPF0016-domain-containing protein [Aspergillus ruber CBS 135680]	_	UPF0016 domain protein, putative (AFU_orthologue; AFUA_3G07080)	_
g2047	5.6	11.71	1.05	0.0674	0.27	no	up	4	13.51	1.73	0.0174	0.155	no	up	4	6.54	0.7	0.381	0.957	no	up	4	12.98	1.67	0.0146	0.0621	no	up	sterol desaturase family, partial [Aspergillus ruber CBS 135680]	_	Sterol desaturase family	_
g5270	46.53	96.2	1.05	0.0678	0.271	no	up	36.81	66.34	0.85	0.271	0.731	no	up	36.81	47.02	0.35	0.71	1	no	up	36.81	102.69	1.48	0.0304	0.109	no	up	hypothetical protein EURHEDRAFT_407851 [Aspergillus ruber CBS 135680]	_	Putative uncharacterized protein	_
g5392	0.81	1.78	1.05	0.093	0.331	no	up	0.87	1.71	0.9	0.285	0.748	no	up	0.87	1.16	0.38	0.718	1	no	up	0.87	1.63	0.83	0.264	0.482	no	up	SET domain protein [Aspergillus ruber CBS 135680]	_	SET domain protein	_
g1294	1402.55	2889.96	1.04	0.0637	0.259	no	up	1372.37	1621.14	0.24	0.841	0.982	no	up	1372.37	1156.99	-0.25	0.598	1	no	down	1372.37	2600.92	0.92	0.165	0.359	no	up	ribosomal protein S5 [Aspergillus ruber CBS 135680]	_	ribosomal protein S5 (AFU_orthologue; AFUA_7G01460)	RP-S2e, RPS2
g3625	113	232.72	1.04	0.0641	0.26	no	up	50.47	189.97	1.91	0.0075	0.0834	no	up	50.47	90.77	0.85	0.256	0.858	no	up	50.47	199.66	1.98	0.00358	0.02	yes	up	eukaryotic translation initiation factor 3 subunit K [Aspergillus ruber CBS 135680]	_	Eukaryotic translation initiation factor 3 subunit K (eIF3k)(eIF-3 p25); Component of the eu [...]	EIF3K
g3219	1628.34	3347.27	1.04	0.0644	0.261	no	up	1509.26	1848.7	0.29	0.779	0.972	no	up	1509.26	1369.4	-0.14	0.715	1	no	down	1509.26	2704.99	0.84	0.205	0.413	no	up	ribosomal protein L18ae [Aspergillus ruber CBS 135680]	_	Ribosomal L18ae protein family	RP-L18Ae, RPL18A
g171	45.15	92.85	1.04	0.0647	0.262	no	up	41.34	42.73	0.05	0.926	0.994	no	up	41.34	62.05	0.58	0.458	0.981	no	up	41.34	124.27	1.59	0.0184	0.0743	no	up	hypothetical protein EURHEDRAFT_513356 [Aspergillus ruber CBS 135680]	_	_	_
g6137	3094.91	6352.22	1.04	0.0648	0.262	no	up	4934.14	7127.78	0.53	0.519	0.891	no	up	4934.14	4219.8	-0.23	0.62	1	no	down	4934.14	8382.22	0.76	0.25	0.467	no	up	hypothetical protein EURHEDRAFT_374478 [Aspergillus ruber CBS 135680]	_	Title: strong similarity to hex1 - Aspergillus nidulans [putative frameshift]; Function: N. [...]	_
g8224	25.84	53.31	1.04	0.0651	0.263	no	up	13.66	23.6	0.78	0.307	0.767	no	up	13.66	22.78	0.73	0.336	0.927	no	up	13.66	52.3	1.93	0.00473	0.0252	yes	up	tafazzin [Aspergillus ruber CBS 135680]	_	Contig An02c0150, complete genome. Precursor (EC 2.3.1.-)	TAZ
g1216	31.29	64.25	1.04	0.0656	0.265	no	up	50.28	56.05	0.16	0.943	0.997	no	up	50.28	47.41	-0.08	0.781	1	no	down	50.28	80.32	0.67	0.311	0.535	no	up	putative ATP dependent RNA helicase [Aspergillus ruber CBS 135680]	_	ATP-dependent RNA helicase dhh1 (EC 3.6.1.-); ATP-dependent RNA helicase involved in mRNA tu [...]	DDX6, RCK, DHH1
g2939	52.53	108.02	1.04	0.0658	0.265	no	up	96.62	49.97	-0.95	0.111	0.481	no	down	96.62	77.64	-0.32	0.53	1	no	down	96.62	83.54	-0.21	0.74	0.869	no	down	hypothetical protein MAC_07706 [Metarhizium acridum CQMa 102]	_	_	_
g7520	14.32	29.53	1.04	0.0658	0.265	no	up	12.32	20.32	0.72	0.356	0.804	no	up	12.32	18.91	0.61	0.434	0.974	no	up	12.32	41.31	1.74	0.0102	0.047	yes	up	hypothetical protein EURHEDRAFT_417183 [Aspergillus ruber CBS 135680]	_	_	_
g2228	5.2	10.81	1.04	0.0687	0.274	no	up	9.05	12.75	0.49	0.564	0.91	no	up	9.05	8.85	-0.03	0.851	1	no	down	9.05	11.68	0.36	0.592	0.775	no	up	putative alpha/beta fold family hydrolase [Aspergillus ruber CBS 135680]	_	Pc20g11760	K07019
g756	13.31	27.39	1.04	0.0704	0.278	no	up	5.56	7.92	0.5	0.575	0.913	no	up	5.56	11.71	1.06	0.164	0.7	no	up	5.56	23	2.03	0.00373	0.0207	yes	up	Cupin_5-domain-containing protein [Sphaerulina musiva SO2202]	_	Similarity to hypothetical protein YML079w - Saccharomyces cerevisiae	K09705
g1997	2.02	4.27	1.04	0.0756	0.29	no	up	1.37	2.12	0.59	0.503	0.886	no	up	1.37	2.75	0.96	0.222	0.807	no	up	1.37	6.54	2.18	0.00228	0.0137	yes	up	MFS general substrate transporter, partial [Aspergillus ruber CBS 135680]	_	_	_
g7886	27.28	55.93	1.03	0.0668	0.268	no	up	16.72	28.61	0.77	0.315	0.775	no	up	16.72	28.14	0.75	0.327	0.92	no	up	16.72	50.09	1.58	0.0198	0.0788	no	up	mitochondrial carrier [Aspergillus ruber CBS 135680]	_	Mitochondrial carrier protein	SLC25A34_35, OAC1
g3910	59.16	120.78	1.03	0.0675	0.27	no	up	32.89	85.91	1.38	0.0558	0.332	no	up	32.89	35.1	0.09	0.997	1	no	up	32.89	96.26	1.55	0.0218	0.0847	no	up	Brix-domain-containing protein [Aspergillus ruber CBS 135680]	_	Ribosome biogenesis protein, putative	RPF2
g779	13.39	27.45	1.03	0.0676	0.27	no	up	8.11	14.2	0.8	0.293	0.759	no	up	8.11	9.04	0.15	0.933	1	no	up	8.11	26.91	1.72	0.0111	0.0504	no	up	histone H3-K79 methyltransferase [Aspergillus ruber CBS 135680]	_	Histone methylation protein Dot1, putative	DOT1L, DOT1
g2280	14.49	29.6	1.03	0.0677	0.27	no	up	27.33	31.98	0.23	0.859	0.984	no	up	27.33	24.92	-0.13	0.726	1	no	down	27.33	43.94	0.68	0.305	0.529	no	up	putative snRNA cap binding complex subunit [Aspergillus ruber CBS 135680]	_	Cap binding protein	NCBP1, CBP80
g5468	5.81	11.98	1.03	0.0692	0.275	no	up	15.73	17.76	0.17	0.92	0.993	no	up	15.73	9.49	-0.72	0.215	0.794	no	down	15.73	16.93	0.11	0.886	0.95	no	up	homeobox-domain-containing protein [Aspergillus ruber CBS 135680]	_	Afu4g04320 (Alt. Locus), homeobox transcription factor, putative, similar to LIM homeodomain [...]	_
g6160	9.33	19.19	1.03	0.0753	0.29	no	up	10.38	10.2	-0.02	0.861	0.984	no	down	10.38	19.88	0.93	0.223	0.81	no	up	10.38	28.43	1.44	0.036	0.123	no	up	putative isochorismatase family hydrolase [Aspergillus ruber CBS 135680]	_	Isochorismatase family hydrolase, putative	_
g2192	6.97	14.27	1.02	0.0672	0.27	no	up	4.41	12.95	1.53	0.0315	0.231	no	up	4.41	9.92	1.15	0.108	0.568	no	up	4.41	33.51	2.9	3.56e-05	0.000384	yes	up	tuberin [Aspergillus ruber CBS 135680]	_	_	_
g7715	47.88	97.47	1.02	0.0676	0.27	no	up	31.25	68.47	1.13	0.122	0.5	no	up	31.25	73.98	1.24	0.084	0.491	no	up	31.25	126.28	2.01	0.0031	0.0177	yes	up	hypothetical protein EURHEDRAFT_379953 [Aspergillus ruber CBS 135680]	_	_	LARP1
g6211	8.54	17.39	1.02	0.0684	0.273	no	up	4.82	13.41	1.46	0.0413	0.275	no	up	4.82	6.22	0.36	0.689	1	no	up	4.82	14.05	1.52	0.0227	0.0877	no	up	hypothetical protein EURHEDRAFT_512580 [Aspergillus ruber CBS 135680]	_	HEAT repeat protein	_
g7702	52.55	106.81	1.02	0.0686	0.273	no	up	39.3	56.17	0.51	0.537	0.898	no	up	39.3	46.11	0.23	0.841	1	no	up	39.3	100.91	1.36	0.0426	0.139	no	up	TIM44 subunit of mitochondria import inner membrane translocase [Aspergillus ruber CBS 135680]	_	Mitochondrial inner membrane translocase subunit TIM44, putative	TIM44
g3247	18.41	37.42	1.02	0.0689	0.274	no	up	14.85	19.5	0.39	0.667	0.942	no	up	14.85	38.05	1.35	0.0587	0.393	no	up	14.85	96.76	2.7	0.000109	0.00102	yes	up	hypothetical protein EURHEDRAFT_464675 [Aspergillus ruber CBS 135680]	_	Putative uncharacterized protein	_
g1540	2051.78	4152.07	1.02	0.0694	0.276	no	up	1292.78	2050.79	0.67	0.396	0.829	no	up	1292.78	1635.86	0.34	0.713	1	no	up	1292.78	3311.36	1.36	0.0426	0.139	no	up	ribosomal protein S25 [Aspergillus ruber CBS 135680]	_	Function: RPS31 is a structural protein of the small ribosomal	RP-S25e, RPS25
g4290	18.66	38.05	1.02	0.0694	0.276	no	up	11.24	20.7	0.88	0.247	0.706	no	up	11.24	15.95	0.5	0.541	1	no	up	11.24	27.47	1.28	0.0566	0.171	no	up	oxidoreductase [Aspergillus ruber CBS 135680]	_	Oxidoreductase, 2OG-Fe(II) oxygenase family	_
g1560	21.55	43.74	1.02	0.0701	0.277	no	up	16.19	17.17	0.08	0.978	1	no	up	16.19	26.13	0.69	0.373	0.95	no	up	16.19	57.91	1.83	0.00701	0.0347	yes	up	MFS quinate transporter [Aspergillus ruber CBS 135680]	_	Contig An01c0330, complete genome	_
g7820	120.66	244.36	1.02	0.0704	0.278	no	up	72.34	16.23	-2.15	0.00125	0.0224	yes	down	72.34	116.4	0.69	0.376	0.95	no	up	72.34	176.52	1.29	0.056	0.17	no	up	hypothetical protein EURHEDRAFT_416034 [Aspergillus ruber CBS 135680]	_	Predicted protein	_
g1723	8.83	17.96	1.02	0.0739	0.286	no	up	7.39	12.17	0.71	0.365	0.809	no	up	7.39	15.63	1.07	0.146	0.667	no	up	7.39	33.76	2.18	0.00163	0.0104	yes	up	hypothetical protein EURHEDRAFT_399378 [Aspergillus ruber CBS 135680]	_	_	_
g6854	7.47	15.2	1.02	0.0775	0.296	no	up	5.95	17.62	1.55	0.0344	0.246	no	up	5.95	14.42	1.26	0.0854	0.494	no	up	5.95	14.6	1.28	0.0635	0.185	no	up	hypothetical protein EURHEDRAFT_459925 [Aspergillus ruber CBS 135680]	_	Putative uncharacterized protein	_
g7678	2.67	5.51	1.02	0.0883	0.321	no	up	1.44	4.07	1.44	0.0651	0.361	no	up	1.44	1.82	0.32	0.801	1	no	up	1.44	11.99	2.97	4.92e-05	0.000507	yes	up	hypothetical protein EURHEDRAFT_416650 [Aspergillus ruber CBS 135680]	_	Putative uncharacterized protein	_
g3161	1414.62	2853.47	1.01	0.0704	0.278	no	up	1403.76	1793.43	0.35	0.709	0.951	no	up	1403.76	1446.42	0.04	0.933	1	no	up	1403.76	1732.41	0.3	0.652	0.814	no	up	eukaryotic translation initiation factor eIF-5A [Aspergillus ruber CBS 135680]	_	Function: Translation intitiation factor eIF-5A	EIF5A
g5416	1649.42	3326.75	1.01	0.0704	0.278	no	up	1307.67	1664.48	0.35	0.715	0.951	no	up	1307.67	1426.19	0.13	0.967	1	no	up	1307.67	2732.08	1.06	0.11	0.272	no	up	60S ribosomal protein L7 [Aspergillus ruber CBS 135680]	_	60S ribosomal protein L7	RP-L7e, RPL7
g1742	148.44	299.5	1.01	0.0705	0.278	no	up	136.77	174.43	0.35	0.712	0.951	no	up	136.77	142.33	0.06	0.95	1	no	up	136.77	242.96	0.83	0.213	0.422	no	up	putative nuclear segregation protein [Aspergillus ruber CBS 135680]	_	Putative uncharacterized protein	_
g6290	11.05	22.42	1.01	0.0718	0.281	no	up	14	16.99	0.28	0.797	0.975	no	up	14	16.18	0.21	0.871	1	no	up	14	35.73	1.35	0.045	0.145	no	up	hypothetical protein EURHEDRAFT_461522 [Aspergillus ruber CBS 135680]	_	Predicted protein	_
g7102	448.04	899.84	1.01	0.0719	0.281	no	up	282.58	504.5	0.84	0.268	0.729	no	up	282.58	337.54	0.26	0.809	1	no	up	282.58	739.23	1.39	0.0383	0.128	no	up	ribosomal protein L34 protein [Aspergillus ruber CBS 135680]	_	Contig An07c0220, complete genome	RP-L34e, RPL34
g6231	13.43	27.08	1.01	0.0725	0.283	no	up	9.84	18.93	0.94	0.209	0.661	no	up	9.84	18.95	0.94	0.204	0.774	no	up	9.84	40.77	2.04	0.00282	0.0163	yes	up	PAP2 domain protein [Aspergillus ruber CBS 135680]	_	PAP2 domain protein	_
g2512	49.21	98.99	1.01	0.0731	0.284	no	up	31.9	49.62	0.64	0.426	0.845	no	up	31.9	49.78	0.64	0.413	0.968	no	up	31.9	54.41	0.77	0.252	0.469	no	up	phosphoglycerate mutase-like protein [Aspergillus ruber CBS 135680]	_	phosphoglycerate mutase family protein (AFU_orthologue; AFUA_6G02600)	gpmB
g6572	6.06	12.33	1.01	0.0754	0.29	no	up	7.62	8.96	0.23	0.858	0.983	no	up	7.62	8.94	0.23	0.849	1	no	up	7.62	14.08	0.88	0.195	0.399	no	up	CHL4 family chromosome segregation protein [Aspergillus ruber CBS 135680]	_	Afu4g06540 (Alt. Locus), CHL4 family chromosome segregation protein, putative	MIS15, CHL4
g7614	49.71	99.76	1	0.0729	0.284	no	up	32.11	53.34	0.73	0.345	0.797	no	up	32.11	47.1	0.55	0.491	0.988	no	up	32.11	82.82	1.36	0.0418	0.137	no	up	actin interacting protein 2 [Aspergillus ruber CBS 135680]	_	Actin interacting protein 2	_
g4923	16.19	32.59	1	0.0734	0.285	no	up	15.04	21.46	0.51	0.542	0.901	no	up	15.04	21.91	0.54	0.503	0.991	no	up	15.04	35.91	1.25	0.0625	0.183	no	up	hypothetical protein EURHEDRAFT_378552 [Aspergillus ruber CBS 135680]	_	Mitochondrial chaperone BCS1, putative	BCS1
g762	9.33	18.77	1	0.0736	0.286	no	up	18.39	15.96	-0.2	0.635	0.932	no	down	18.39	18.43	0	0.887	1	no	up	18.39	20.31	0.14	0.839	0.927	no	up	DNA ligase [Aspergillus glaucus]	_	DNA ligase (Eurofung); Involved in ds DNA break repair. Has a role in non- homologous integr [...]	LIG4, DNL4
g3399	45.46	91.14	1	0.0737	0.286	no	up	21.51	65.01	1.59	0.027	0.209	no	up	21.51	23.86	0.15	0.942	1	no	up	21.51	69.04	1.68	0.0133	0.0578	no	up	60S ribosome biogenesis protein Brx1 [Aspergillus ruber CBS 135680]	_	60S ribosome biogenesis protein Brx1, putative	BRX1, BRIX1
g108	19.58	39.3	1	0.0738	0.286	no	up	13.26	20.4	0.62	0.439	0.853	no	up	13.26	28.61	1.1	0.129	0.628	no	up	13.26	44.19	1.73	0.0107	0.0487	yes	up	FAD/NAD(P)-binding domain-containing protein [Aspergillus ruber CBS 135680]	_	Flavin-containing monooxygenase	_
g734	13.53	27.2	1	0.0739	0.286	no	up	6.11	14.69	1.25	0.0842	0.414	no	up	6.11	18.99	1.62	0.0228	0.207	no	up	6.11	35.19	2.51	0.0003	0.00248	yes	up	hypothetical protein EURHEDRAFT_458882 [Aspergillus ruber CBS 135680]	_	_	_
g2286	37.57	75.28	1	0.0742	0.287	no	up	46.5	48.95	0.07	0.958	0.999	no	up	46.5	38.97	-0.25	0.594	1	no	down	46.5	82.77	0.83	0.213	0.423	no	up	RNA-binding domain-containing protein [Aspergillus ruber CBS 135680]	_	Splicing factor 3b subunit 4	SF3B4, SAP49
g1863	51.76	103.68	1	0.0742	0.287	no	up	30.58	82.14	1.42	0.0494	0.309	no	up	30.58	46.9	0.62	0.437	0.975	no	up	30.58	70.81	1.21	0.0723	0.203	no	up	hypothetical protein EURHEDRAFT_415517 [Aspergillus ruber CBS 135680]	_	Putative uncharacterized protein	_
g5491	75.58	151.17	1	0.0747	0.288	no	up	87.83	99.49	0.18	0.916	0.992	no	up	87.83	118.21	0.43	0.617	1	no	up	87.83	121.45	0.47	0.486	0.695	no	up	PRTase-like protein [Aspergillus ruber CBS 135680]	_	Putative uncharacterized protein	K07101
g6924	14.15	28.33	1	0.0754	0.29	no	up	38.08	24.75	-0.62	0.269	0.729	no	down	38.08	53	0.48	0.565	1	no	up	38.08	91.2	1.26	0.0599	0.178	no	up	acetyl-CoA synthetase-like protein [Aspergillus ruber CBS 135680]	_	Pc22g24780	_
g7063	21.18	42.37	1	0.0832	0.31	no	up	61.55	55.8	-0.14	0.712	0.951	no	down	61.55	49.03	-0.33	0.525	1	no	down	61.55	48.08	-0.36	0.587	0.771	no	down	_	_	_	_
g1487	7.75	15.57	1	0.0834	0.311	no	up	14.8	13.61	-0.12	0.745	0.962	no	down	14.8	11.02	-0.42	0.446	0.975	no	down	14.8	22.38	0.59	0.384	0.604	no	up	hypothetical protein EURHEDRAFT_456627 [Aspergillus ruber CBS 135680]	_	Putative uncharacterized protein	_
g7083	13.68	27.39	1	0.0887	0.322	no	up	15.73	24.02	0.61	0.479	0.873	no	up	15.73	18.43	0.23	0.866	1	no	up	15.73	25.14	0.67	0.343	0.565	no	up	hypothetical protein EURHEDRAFT_374698 [Aspergillus ruber CBS 135680]	_	COMPASS complex subunit Sdc1, putative	CPS25, SDC1
g2651	1.46	3.03	1	0.108	0.363	no	up	1.84	3.23	0.78	0.356	0.804	no	up	1.84	2.82	0.59	0.503	0.991	no	up	1.84	0.88	-0.99	0.211	0.42	no	down	hypothetical protein EURHEDRAFT_398915 [Aspergillus ruber CBS 135680]	_	_	RPA1, POLR1A
g7193	0.44	0.98	1	0.219	0.54	no	up	0.14	0.23	0	1	1	no	no change	0.14	0.91	0	1	1	no	no change	0.14	1.61	2.83	0.00281	0.0163	yes	up	short chain type dehydrogenase [Aspergillus oryzae RIB40]	_	Short-chain alcohol dehydrogenase of unknown specificity	_
g7994	0.5	1.1	1	0.219	0.54	no	up	0.4	0.69	0	1	1	no	no change	0.4	0.39	0	1	1	no	no change	0.4	0.24	0	1	1	no	no change	hypothetical protein EURHEDRAFT_381908 [Aspergillus ruber CBS 135680]	_	Predicted protein	_
g6340	5.09	10.24	0.99	0.0751	0.289	no	up	27.48	9.03	-1.59	0.0114	0.113	no	down	27.48	23	-0.26	0.59	1	no	down	27.48	15.11	-0.86	0.189	0.392	no	down	Zn(II)2Cys6 transcription factor [Aspergillus ruber CBS 135680]	_	Predicted protein	_
g5538	8.26	16.53	0.99	0.0754	0.29	no	up	10.3	9.96	-0.05	0.818	0.977	no	down	10.3	11.38	0.14	0.949	1	no	up	10.3	22.05	1.09	0.101	0.258	no	up	hypothetical protein EURHEDRAFT_415322 [Aspergillus ruber CBS 135680]	_	_	RRN6
g1297	13.5	26.92	0.99	0.0757	0.29	no	up	8.64	14.11	0.7	0.367	0.812	no	up	8.64	14.09	0.7	0.36	0.939	no	up	8.64	33.5	1.94	0.00425	0.0231	yes	up	isoleucyl-tRNA synthetase [Aspergillus ruber CBS 135680]	_	Isoleucyl-tRNA synthetase, putative	IARS, ileS
g3155	116.25	230.54	0.99	0.0763	0.292	no	up	84.07	132.33	0.65	0.406	0.834	no	up	84.07	127.25	0.6	0.446	0.975	no	up	84.07	233.94	1.48	0.0278	0.102	no	up	hypothetical protein EURHEDRAFT_457558 [Aspergillus ruber CBS 135680]	_	Mitochondrial translation initiation factor IF-2, putative	EIF5B
g5914	6.45	12.92	0.99	0.0771	0.294	no	up	6.58	12.54	0.92	0.218	0.671	no	up	6.58	10.14	0.62	0.43	0.972	no	up	6.58	23.34	1.81	0.00755	0.0368	yes	up	P-loop containing nucleoside triphosphate hydrolase protein [Aspergillus ruber CBS 135680]	_	Origin recognition complex subunit Orc1, putative	ORC1
g5779	36.24	71.88	0.99	0.0778	0.296	no	up	31.98	47.94	0.58	0.473	0.87	no	up	31.98	37.35	0.22	0.85	1	no	up	31.98	58.17	0.86	0.197	0.403	no	up	hypothetical protein EURHEDRAFT_411076 [Aspergillus ruber CBS 135680]	_	DnaJ domain protein (Mas5), putative	DNAJA2
g4890	6.28	12.6	0.99	0.0787	0.298	no	up	9.12	10.56	0.21	0.879	0.988	no	up	9.12	10.73	0.23	0.841	1	no	up	9.12	18.61	1.02	0.127	0.298	no	up	putative actin-related protein RO7 [Aspergillus ruber CBS 135680]	_	Pc13g14450	_
g2696	3.72	7.49	0.99	0.0802	0.302	no	up	5.18	9.81	0.91	0.229	0.685	no	up	5.18	7.51	0.53	0.521	0.998	no	up	5.18	7.49	0.52	0.437	0.655	no	up	hypothetical protein EURHEDRAFT_373292 [Aspergillus ruber CBS 135680]	_	_	_
g7726	0.49	1.07	0.99	0.0884	0.321	no	up	1.81	0.51	-1.65	0.0115	0.114	no	down	1.81	0.84	-1.02	0.0985	0.538	no	down	1.81	1.01	-0.78	0.24	0.456	no	down	calcium transporting ATPase (Pmc1) [Aspergillus oryzae RIB40]	_	calcium ion P-type ATPase (Eurofung)	E3.6.3.8
g6652	3.65	7.36	0.99	0.0971	0.341	no	up	4.25	4.28	0.01	0.919	0.993	no	up	4.25	6.48	0.6	0.474	0.984	no	up	4.25	8.32	0.95	0.178	0.378	no	up	hypothetical protein EURHEDRAFT_415787 [Aspergillus ruber CBS 135680]	_	_	_
g970	10.03	20.02	0.99	0.098	0.342	no	up	3.69	16.4	2.12	0.00711	0.0801	no	up	3.69	18.75	2.31	0.0028	0.0412	yes	up	3.69	35	3.21	2.2e-05	0.000253	yes	up	hypothetical protein EURHEDRAFT_457790 [Aspergillus ruber CBS 135680]	_	_	_
g1463	25.55	50.57	0.98	0.0776	0.296	no	up	28.53	27.37	-0.06	0.798	0.975	no	down	28.53	37.73	0.4	0.643	1	no	up	28.53	53.55	0.91	0.173	0.37	no	up	putative cytoskeleton organization protein [Aspergillus ruber CBS 135680]	_	Afu4g07460 (Alt. Locus), cytoskeleton organisation protein (Dec1), putative, similar to subu [...]	NAA25, MDM20
g7531	39.27	77.63	0.98	0.078	0.297	no	up	39.74	40.99	0.04	0.923	0.993	no	up	39.74	66.99	0.75	0.32	0.917	no	up	39.74	71.65	0.85	0.202	0.409	no	up	putative oxidoreductase [Aspergillus ruber CBS 135680]	_	Predicted component of NuA3 histone acetyltransferase complex	_
g5560	588.02	1156.68	0.98	0.0791	0.299	no	up	388.57	673.05	0.79	0.298	0.764	no	up	388.57	460.62	0.25	0.822	1	no	up	388.57	961.14	1.31	0.0507	0.157	no	up	glutaredoxin domain protein [Aspergillus ruber CBS 135680]	_	60S ribosomal protein L9-B	RP-L9e, RPL9
g2858	206.36	405.9	0.98	0.0793	0.3	no	up	215.26	177.04	-0.28	0.551	0.903	no	down	215.26	212.17	-0.02	0.855	1	no	down	215.26	239.37	0.15	0.826	0.919	no	up	peptide chain release factor eRF/aRF, subunit 1 [Aspergillus ruber CBS 135680]	_	Peptide chain release factor eRF/aRF, subunit 1	ETF1, ERF1
g2205	7.1	14.09	0.98	0.08	0.301	no	up	5.25	14.19	1.42	0.0495	0.309	no	up	5.25	5.69	0.11	0.986	1	no	up	5.25	18.97	1.83	0.00692	0.0344	yes	up	putative mitochondrial translation optimization protein [Aspergillus ruber CBS 135680]	_	Mitochondrial translation optimization protein (Mto1), putative	gidA, mnmG, MTO1
g4465	7.05	14	0.98	0.0804	0.302	no	up	2.29	8.93	1.92	0.00831	0.09	no	up	2.29	2.2	-0.06	0.843	1	no	down	2.29	2.31	0.01	1	1	no	up	hypothetical protein EURHEDRAFT_379811 [Aspergillus ruber CBS 135680]	_	_	_
g6644	15.42	30.57	0.98	0.0823	0.308	no	up	25.58	27.26	0.09	0.987	1	no	up	25.58	26.71	0.06	0.961	1	no	up	25.58	39.51	0.63	0.351	0.572	no	up	mediator of RNA polymerase II transcription subunit 7 [Aspergillus ruber CBS 135680]	_	Mediator of RNA polymerase II transcription subunit 7 (Mediator complex subunit 7); Componen [...]	MED7
g7406	14.28	28.2	0.98	0.0899	0.325	no	up	8.39	16.45	0.96	0.227	0.683	no	up	8.39	8.61	0.04	0.943	1	no	up	8.39	34.3	2.02	0.00458	0.0245	yes	up	hypothetical protein EURHEDRAFT_505192 [Aspergillus ruber CBS 135680]	_	_	_
g4526	0.71	1.5	0.98	0.102	0.35	no	up	0.05	0.27	0	1	1	no	no change	0.05	11.93	6.33	5.53e-14	3.64e-11	yes	up	0.05	1.6	3.5	2.74e-06	3.86e-05	yes	up	urea active transporter [Aspergillus ruber CBS 135680]	_	Urea active transporter, putative	_
g1330	1.67	3.4	0.98	0.116	0.38	no	up	0.93	3	1.59	0.0497	0.309	no	up	0.93	1.53	0.66	0.495	0.989	no	up	0.93	4.15	2.04	0.00615	0.031	yes	up	alpha/beta-hydrolase [Aspergillus ruber CBS 135680]	_	_	_
g2016	1.48	3.01	0.98	0.145	0.436	no	up	3.76	1.66	-1.13	0.118	0.493	no	down	3.76	2.44	-0.6	0.374	0.95	no	down	3.76	1.51	-1.26	0.107	0.267	no	down	cytosolic Cu/Zn superoxide dismutase [Aspergillus ruber CBS 135680]	_	_	_
g2830	76.02	149.33	0.97	0.0812	0.305	no	up	85.75	113.9	0.41	0.651	0.935	no	up	85.75	93.01	0.12	0.98	1	no	up	85.75	128.7	0.59	0.382	0.603	no	up	prenylated rab acceptor 1 [Aspergillus ruber CBS 135680]	_	Localization: Yip3 is selectively and efficiently packaged into COPII vesicles	_
g7897	169.99	332.28	0.97	0.0816	0.306	no	up	316.78	337.91	0.09	0.981	1	no	up	316.78	177.09	-0.84	0.155	0.681	no	down	316.78	498.87	0.66	0.325	0.548	no	up	protein transport protein SEC61 alpha subunit [Aspergillus ruber CBS 135680]	_	Protein transport protein SEC61 alpha subunit	SEC61A
g3188	48.15	94.11	0.97	0.0824	0.308	no	up	32.63	70.58	1.11	0.13	0.519	no	up	32.63	40.19	0.3	0.761	1	no	up	32.63	100	1.61	0.0167	0.0693	no	up	hypothetical protein EURHEDRAFT_516021 [Aspergillus ruber CBS 135680]	_	_	_
g2276	39.73	77.93	0.97	0.0846	0.313	no	up	29.47	45.98	0.64	0.43	0.848	no	up	29.47	29.79	0.02	0.91	1	no	up	29.47	56.14	0.93	0.174	0.371	no	up	ubiquitin-related modifier 1 [Aspergillus oryzae RIB40]	_	Ubiquitin-related modifier 1 ; Acts as a sulfur carrier required for 2-thiolation of mcm(5)S [...]	URM1
g1341	8.49	16.77	0.97	0.085	0.314	no	up	3.66	5.91	0.68	0.409	0.838	no	up	3.66	14.08	1.92	0.00865	0.0993	no	up	3.66	14.75	1.98	0.00436	0.0235	yes	up	triacylglycerol lipase [Aspergillus ruber CBS 135680]	_	Triacylglycerol lipase, putative	E3.1.1.3
g2837	18.01	35.44	0.97	0.0851	0.314	no	up	20.31	42.26	1.05	0.158	0.578	no	up	20.31	32.3	0.67	0.398	0.961	no	up	20.31	53.84	1.4	0.0387	0.129	no	up	hypothetical protein EURHEDRAFT_490387 [Aspergillus ruber CBS 135680]	_	Putative uncharacterized protein Precursor	_
g5605	10.78	21.25	0.97	0.0864	0.317	no	up	13.97	22.27	0.67	0.402	0.832	no	up	13.97	18.33	0.39	0.666	1	no	up	13.97	22.68	0.7	0.308	0.532	no	up	hypothetical protein EURHEDRAFT_517459 [Aspergillus ruber CBS 135680]	_	Putative uncharacterized protein	_
g2243	3.84	7.6	0.97	0.0895	0.324	no	up	1.53	7.68	2.25	0.00219	0.0347	yes	up	1.53	8.55	2.41	0.00101	0.0175	yes	up	1.53	12.72	2.98	3.93e-05	0.000415	yes	up	hypothetical protein EURHEDRAFT_466967 [Aspergillus ruber CBS 135680]	_	_	_
g4586	1.34	2.72	0.97	0.116	0.38	no	up	0.72	1.84	1.24	0.131	0.519	no	up	0.72	11.74	3.85	8.78e-07	4.93e-05	yes	up	0.72	2.9	1.87	0.0109	0.0496	yes	up	Clavaminate synthase-like protein [Aspergillus ruber CBS 135680]	_	Pc13g10890	_
g2024	139.67	272.64	0.96	0.0823	0.308	no	up	59.35	114.46	0.95	0.204	0.652	no	up	59.35	157.13	1.4	0.0498	0.354	no	up	59.35	192.98	1.7	0.0118	0.0525	no	up	putative ethanolamine kinase [Aspergillus ruber CBS 135680]	_	Ethanolamine kinase, putative	ETNK, EKI
g5439	56.75	110.65	0.96	0.0826	0.309	no	up	56.21	46.84	-0.26	0.57	0.913	no	down	56.21	35.51	-0.66	0.247	0.848	no	down	56.21	172.2	1.61	0.0165	0.0685	no	up	hypothetical protein EURHEDRAFT_381104 [Aspergillus ruber CBS 135680]	_	_	_
g1976	106.72	207.85	0.96	0.0831	0.31	no	up	54.17	186.33	1.78	0.0127	0.123	no	up	54.17	90.78	0.74	0.326	0.92	no	up	54.17	142.12	1.39	0.038	0.128	no	up	NADH dehydrogenase [Aspergillus ruber CBS 135680]	_	NADH-dehydrogenase	ndh1
g1435	2172.21	4222.32	0.96	0.0835	0.311	no	up	1675.73	2266.88	0.44	0.617	0.924	no	up	1675.73	1575.23	-0.09	0.774	1	no	down	1675.73	2958.49	0.82	0.217	0.427	no	up	40S ribosomal protein S11 [Aspergillus clavatus NRRL 1]	_	40S ribosomal protein S11	RP-S11e, RPS11
g7336	52.58	102.5	0.96	0.0836	0.311	no	up	31.94	50.67	0.66	0.4	0.831	no	up	31.94	41.09	0.36	0.689	1	no	up	31.94	94.92	1.57	0.0201	0.0797	no	up	hypothetical protein EURHEDRAFT_383623 [Aspergillus ruber CBS 135680]	_	Putative uncharacterized protein	_
g6978	16.46	32.17	0.96	0.0836	0.311	no	up	34.12	27.14	-0.33	0.505	0.886	no	down	34.12	35.86	0.07	0.968	1	no	up	34.12	44.73	0.39	0.562	0.752	no	up	fatty-acyl coenzyme A oxidase [Aspergillus ruber CBS 135680]	_	Fatty-acyl coenzyme A oxidase (Pox1), putative	E1.3.3.6, ACOX1, ACOX3
g3710	1.86	3.71	0.96	0.0837	0.311	no	up	2.39	4.81	0.98	0.184	0.622	no	up	2.39	3.69	0.61	0.437	0.975	no	up	2.39	4.58	0.91	0.168	0.363	no	up	hypothetical protein EURHEDRAFT_519395 [Aspergillus ruber CBS 135680]	_	_	_
g801	25.2	49.13	0.96	0.0841	0.312	no	up	24.58	25.93	0.08	0.963	0.999	no	up	24.58	201.59	3.03	3.06e-05	0.000981	yes	up	24.58	148.08	2.59	0.000201	0.00174	yes	up	aldehyde dehydrogenase, allergen Cla h 10 [Aspergillus ruber CBS 135680]	_	hypothetical protein	E1.2.1.3
g2316	28.11	54.96	0.96	0.0841	0.312	no	up	23.4	42.64	0.86	0.254	0.712	no	up	23.4	25.73	0.14	0.958	1	no	up	23.4	34.12	0.54	0.42	0.639	no	up	hypothetical protein EURHEDRAFT_410372 [Aspergillus ruber CBS 135680]	_	Contig An05c0010, complete genome	CBP3, UQCC
g2339	27.03	52.51	0.96	0.0852	0.314	no	up	42.6	31.53	-0.43	0.411	0.838	no	down	42.6	51.25	0.27	0.799	1	no	up	42.6	116.21	1.45	0.0312	0.111	no	up	protein ras-2 [Aspergillus ruber CBS 135680]	_	Ras small monomeric GTPase RasB	KRAS, KRAS2
g1562	13.28	25.91	0.96	0.0852	0.314	no	up	9.15	15.55	0.76	0.325	0.783	no	up	9.15	17.66	0.94	0.204	0.774	no	up	9.15	25.62	1.48	0.0285	0.104	no	up	threonyl-tRNA synthetase [Aspergillus ruber CBS 135680]	_	Afu1g16210 (Alt. Locus), threonyl-tRNA synthetase, (6.1.1.3)	TARS, thrS
g1018	5.74	11.28	0.96	0.0856	0.315	no	up	30.79	8.13	-1.91	0.00308	0.0441	yes	down	30.79	14.85	-1.05	0.0848	0.493	no	down	30.79	15.06	-1.03	0.118	0.284	no	down	esterase/lipase [Aspergillus ruber CBS 135680]	_	Esterase/lipase, putative	_
g6319	14.17	27.63	0.96	0.0868	0.318	no	up	15.29	23.19	0.6	0.46	0.862	no	up	15.29	16.61	0.12	0.979	1	no	up	15.29	32.56	1.09	0.106	0.265	no	up	putative deoxyhypusine synthase [Aspergillus ruber CBS 135680]	_	Deoxyhypusine synthase, putative	DHPS, dys
g5978	17.35	33.78	0.96	0.0877	0.321	no	up	29.45	37.07	0.33	0.737	0.959	no	up	29.45	33.2	0.17	0.912	1	no	up	29.45	24.79	-0.25	0.701	0.844	no	down	hypothetical protein EURHEDRAFT_414541 [Aspergillus ruber CBS 135680]	_	_	_
g898	2.95	5.85	0.96	0.0879	0.321	no	up	1.58	7.19	2.12	0.00366	0.0498	yes	up	1.58	0.78	-0.93	0.162	0.695	no	down	1.58	1.94	0.28	0.723	0.858	no	up	RecName: Full=ATP-dependent RNA helicase mss116, mitochondrial; Flags: Precursor unnamed protein product [Aspergillus oryzae RIB40]	_	ATP-dependent RNA helicase mss116, mitochondrial Precursor (EC 3.6.1.-); ATP-dependent RNA h [...]	MSS116
g2070	0.73	1.52	0.96	0.112	0.372	no	up	0.26	15.75	5.46	4.59e-11	2.14e-08	yes	up	0.26	0.95	1.54	0.0421	0.315	no	up	0.26	0.64	1.04	0.174	0.372	no	up	ammonium transporter MEP2 [Aspergillus ruber CBS 135680]	_	Ammonium transporter MEP2	amt, AMT, MEP
g2610	0.52	1.11	0.96	0.205	0.517	no	up	0.76	0.75	-0.02	1	1	no	down	0.76	1.29	0.69	0.524	0.999	no	up	0.76	1.55	0.94	0.24	0.456	no	up	hypothetical protein EURHEDRAFT_29853 [Aspergillus ruber CBS 135680]	_	_	_
g2785	2361.11	4574.18	0.95	0.0848	0.314	no	up	1748.1	2308.11	0.4	0.655	0.937	no	up	1748.1	1733.53	-0.01	0.866	1	no	down	1748.1	3425.44	0.97	0.145	0.327	no	up	hypothetical protein EURHEDRAFT_407402 [Aspergillus ruber CBS 135680]	_	RIB40 genomic DNA, SC001	RP-LP1, RPLP1
g4689	78.04	150.92	0.95	0.0859	0.316	no	up	75.93	104.54	0.46	0.591	0.917	no	up	75.93	89.43	0.24	0.834	1	no	up	75.93	126.35	0.73	0.27	0.489	no	up	phosphatidylserine synthase [Aspergillus ruber CBS 135680]	_	Phosphatidylserine synthase	CHO1, pssA
g1932	34.17	66.09	0.95	0.0861	0.317	no	up	84.09	44.06	-0.93	0.115	0.487	no	down	84.09	93.7	0.16	0.93	1	no	up	84.09	158.09	0.91	0.171	0.367	no	up	hypothetical protein EURHEDRAFT_455579 [Aspergillus ruber CBS 135680]	_	_	_
g5649	255.16	492.64	0.95	0.0862	0.317	no	up	194.16	357.19	0.88	0.241	0.698	no	up	194.16	215.58	0.15	0.936	1	no	up	194.16	402.91	1.05	0.114	0.277	no	up	ATP citrate lyase subunit [Aspergillus ruber CBS 135680]	_	citrate lyase subunit (Eurofung)	ACLY
g2851	35.77	69.15	0.95	0.0864	0.317	no	up	49.85	65.43	0.39	0.666	0.941	no	up	49.85	48.22	-0.05	0.824	1	no	down	49.85	116.01	1.22	0.0683	0.195	no	up	Golgi GDP-mannose transporter [Aspergillus ruber CBS 135680]	_	GDP-mannose transporter (GMT); Involved in the import of GDP-mannose from the cytoplasm into [...]	VRG4, GONST1
g2150	43.8	84.63	0.95	0.0865	0.317	no	up	23.23	76.47	1.71	0.0165	0.149	no	up	23.23	30.16	0.38	0.674	1	no	up	23.23	84.5	1.86	0.00611	0.0308	yes	up	Amidophosphoribosyltransferase [Aspergillus ruber CBS 135680]	_	Contig An15c0090, complete genome. (EC 2.4.2.14)	purF, PPAT
g6408	7.51	14.58	0.95	0.0874	0.32	no	up	6.53	7.84	0.26	0.818	0.977	no	up	6.53	9.28	0.5	0.54	1	no	up	6.53	21.91	1.73	0.0102	0.0472	yes	up	hypothetical protein EURHEDRAFT_413027 [Aspergillus ruber CBS 135680]	_	Putative uncharacterized protein	_
g8245	7.3	14.22	0.95	0.0906	0.327	no	up	8.19	13.05	0.67	0.403	0.832	no	up	8.19	9.3	0.18	0.903	1	no	up	8.19	17.4	1.08	0.11	0.271	no	up	MFS general substrate transporter [Aspergillus ruber CBS 135680]	_	Permease of the major facilitator superfamily	FEN2, LIZ1
g3196	10.51	20.39	0.95	0.0909	0.327	no	up	15.64	11.7	-0.42	0.434	0.85	no	down	15.64	13.38	-0.22	0.629	1	no	down	15.64	24.08	0.62	0.358	0.579	no	up	putative PP-loop ATPase superfamily protein [Aspergillus ruber CBS 135680]	_	PP-loop ATPase superfamily protein, putative	CTU1, NCS6
g2498	2.49	4.89	0.95	0.0977	0.342	no	up	2.84	4.68	0.7	0.382	0.825	no	up	2.84	3.61	0.34	0.725	1	no	up	2.84	5.35	0.89	0.19	0.393	no	up	multiple inositol polyphosphate phosphatase [Aspergillus oryzae RIB40]	_	Multiple inositol polyphosphate phosphatase	E3.1.3.2
g1011	2.63	5.16	0.95	0.0996	0.346	no	up	0.23	5.02	3.96	1.23e-06	9.71e-05	yes	up	0.23	1.63	2.39	0.00261	0.0387	yes	up	0.23	2.78	3.13	6.4e-05	0.00064	yes	up	hypothetical protein EURHEDRAFT_376621 [Aspergillus ruber CBS 135680]	_	_	_
g1241	1093.32	2103	0.94	0.0877	0.32	no	up	498.58	163.05	-1.61	0.0106	0.107	no	down	498.58	396.89	-0.33	0.515	0.995	no	down	498.58	2162.88	2.12	0.00195	0.0121	yes	up	hypothetical protein EURHEDRAFT_378425 [Aspergillus ruber CBS 135680]	_	_	_
g3504	45.94	88.5	0.94	0.0878	0.321	no	up	41.14	55.77	0.44	0.616	0.924	no	up	41.14	56.41	0.45	0.588	1	no	up	41.14	99.87	1.28	0.0561	0.17	no	up	hypothetical protein EURHEDRAFT_378027 [Aspergillus ruber CBS 135680]	_	_	_
g4779	1286.22	2471.22	0.94	0.088	0.321	no	up	846.13	1251.59	0.56	0.486	0.875	no	up	846.13	1018.36	0.27	0.796	1	no	up	846.13	2057.67	1.28	0.055	0.167	no	up	60S ribosomal protein L7A [Aspergillus ruber CBS 135680]	_	60S ribosomal protein L8	RP-L7Ae, RPL7A
g3302	726.96	1396.21	0.94	0.0882	0.321	no	up	712.8	952.4	0.42	0.637	0.932	no	up	712.8	588.61	-0.28	0.567	1	no	down	712.8	1003.66	0.49	0.459	0.673	no	up	hypothetical protein EURHEDRAFT_406014 [Aspergillus ruber CBS 135680]	_	Remark: the ORF overlaps with A. niger EST an_2410 in EMBLEST	RP-L12e, RPL12
g4338	281.39	541.01	0.94	0.0882	0.321	no	up	196.43	380.05	0.95	0.201	0.648	no	up	196.43	364.9	0.89	0.228	0.818	no	up	196.43	395.1	1.01	0.131	0.304	no	up	putative ubiquinol-cytochrome C reductase complex, subunit X, partial [Aspergillus ruber CBS 135680]	_	Ubiquinol-cytochrome C reductase, putative;	QCR9, UCRC
g4385	47.24	91.01	0.94	0.0883	0.321	no	up	36.63	64.5	0.81	0.286	0.748	no	up	36.63	42.76	0.22	0.851	1	no	up	36.63	101.2	1.46	0.0295	0.106	no	up	regulator of G protein signaling superfamily [Aspergillus ruber CBS 135680]	_	RGS domain protein (Rax1), putative	_
g1411	1533.83	2944.38	0.94	0.0885	0.321	no	up	1160.14	1769.16	0.61	0.446	0.856	no	up	1160.14	1492.16	0.36	0.686	1	no	up	1160.14	2419.5	1.06	0.112	0.273	no	up	ribosomal protein L38e [Aspergillus ruber CBS 135680]	_	60S ribosomal protein L38, putative (AFU_orthologue; AFUA_4G07845)	RP-L38e, RPL38
g5484	4.13	8.04	0.94	0.0888	0.322	no	up	5.32	6.5	0.28	0.789	0.975	no	up	5.32	6.85	0.36	0.69	1	no	up	5.32	11.04	1.04	0.118	0.286	no	up	P-loop containing nucleoside triphosphate hydrolase protein [Aspergillus ruber CBS 135680]	_	_	_
g6280	8.12	15.71	0.94	0.0893	0.324	no	up	8.24	18.99	1.19	0.101	0.458	no	up	8.24	15.98	0.95	0.198	0.768	no	up	8.24	22.42	1.43	0.0328	0.115	no	up	mitochondrial DNA helicase (Pif1), putative [Aspergillus clavatus NRRL 1]	_	Mitochondrial DNA helicase (Pif1), putative	PIF1
g5243	81.22	155.85	0.94	0.0895	0.324	no	up	120.9	133.45	0.14	0.96	0.999	no	up	120.9	114.74	-0.08	0.792	1	no	down	120.9	235.89	0.96	0.148	0.331	no	up	steroid alpha reductase family protein [Aspergillus ruber CBS 135680]	_	Steroid alpha reductase family protein	TER, TSC13, CER10
g1697	25.85	49.71	0.94	0.0895	0.324	no	up	38.99	50.46	0.37	0.69	0.946	no	up	38.99	26.68	-0.55	0.33	0.921	no	down	38.99	70.27	0.85	0.203	0.41	no	up	GPI-anchored wall transfer protein 1 [Aspergillus ruber CBS 135680]	_	GPI-anchored wall transfer protein 1	PIGW
g3731	106	203.2	0.94	0.0896	0.324	no	up	88.19	208.69	1.24	0.0873	0.424	no	up	88.19	92.77	0.07	0.97	1	no	up	88.19	148.54	0.75	0.259	0.478	no	up	NAD(P)-binding protein [Aspergillus ruber CBS 135680]	_	Methylenetetrahydrofolate dehydrogenase	MTD1
g2522	955.16	1827.11	0.94	0.0898	0.325	no	up	765.92	1013.84	0.4	0.651	0.935	no	up	765.92	768.84	0.01	0.887	1	no	up	765.92	1603.75	1.07	0.109	0.271	no	up	60S ribosomal protein L24a [Aspergillus kawachii IFO 4308]	_	60S ribosomal protein L24	RP-L24e, RPL24
g3584	21.83	42.07	0.94	0.0907	0.327	no	up	29.6	36.23	0.29	0.783	0.974	no	up	29.6	29.22	-0.02	0.863	1	no	down	29.6	53.21	0.84	0.207	0.415	no	up	hypothetical protein EURHEDRAFT_409545 [Aspergillus ruber CBS 135680]	_	Putative uncharacterized protein	_
g2850	39.31	75.46	0.94	0.0907	0.327	no	up	22.78	38.79	0.77	0.322	0.782	no	up	22.78	36.66	0.68	0.379	0.953	no	up	22.78	76.08	1.74	0.0107	0.0488	yes	up	thioredoxin-like protein [Aspergillus ruber CBS 135680]	_	NTP binding protein, putative	_
g7459	39.35	75.57	0.94	0.0909	0.327	no	up	17.74	32.93	0.89	0.241	0.698	no	up	17.74	34.63	0.96	0.197	0.765	no	up	17.74	55.74	1.65	0.0155	0.0654	no	up	37S ribosomal protein S16 [Aspergillus ruber CBS 135680]	_	37S ribosomal protein S16	RP-S16, MRPS16, rpsP
g2331	5.37	10.36	0.94	0.0912	0.327	no	up	2.27	5.41	1.22	0.095	0.445	no	up	2.27	4.77	1.04	0.154	0.677	no	up	2.27	18.43	2.97	2.77e-05	0.000309	yes	up	DUF803-domain-containing protein [Aspergillus ruber CBS 135680]	_	DUF803 domain membrane protein	_
g5147	33.98	65.2	0.94	0.0913	0.327	no	up	28.78	57.45	0.99	0.183	0.621	no	up	28.78	49.48	0.78	0.306	0.907	no	up	28.78	53.14	0.88	0.188	0.39	no	up	hypothetical protein EURHEDRAFT_413799 [Aspergillus ruber CBS 135680]	_	rRNA-processing protein cgrA ; Involved in nucleolar integrity and required for processing o [...]	CGR1
g6558	10.66	20.49	0.94	0.0917	0.328	no	up	7.17	10.32	0.52	0.537	0.898	no	up	7.17	10.82	0.59	0.463	0.981	no	up	7.17	12.33	0.77	0.252	0.47	no	up	FolC bifunctional protein [Aspergillus ruber CBS 135680]	_	Dihydrofolate synthetase Fol3	FPGS
g2424	25.36	48.58	0.94	0.0922	0.329	no	up	64.23	62.45	-0.04	0.821	0.978	no	down	64.23	74.38	0.21	0.864	1	no	up	64.23	72.12	0.17	0.811	0.908	no	up	hypothetical protein EURHEDRAFT_464358 [Aspergillus ruber CBS 135680]	_	_	_
g1483	51.33	98.5	0.94	0.0923	0.329	no	up	43.02	75.37	0.81	0.293	0.759	no	up	43.02	59.58	0.47	0.578	1	no	up	43.02	92.34	1.1	0.102	0.26	no	up	hypothetical protein EURHEDRAFT_377789 [Aspergillus ruber CBS 135680]	_	_	RP-L34, MRPL34, rpmH
g7881	8.87	17.14	0.94	0.0937	0.332	no	up	8.96	12.09	0.43	0.635	0.932	no	up	8.96	10.1	0.17	0.92	1	no	up	8.96	20.2	1.16	0.0851	0.227	no	up	hypothetical protein EURHEDRAFT_403799 [Aspergillus ruber CBS 135680]	_	Cytoplasmic tRNA 2-thiolation protein 2 ; Plays a central role in 2-thiolation of mcm(5)S(2) [...]	CTU2, NCS2
g5589	7.18	13.91	0.94	0.103	0.352	no	up	3.42	15.71	2.17	0.00391	0.0523	no	up	3.42	8.29	1.25	0.106	0.561	no	up	3.42	14.69	2.07	0.00403	0.022	yes	up	hypothetical protein EURHEDRAFT_462312 [Aspergillus ruber CBS 135680]	_	Putative uncharacterized protein	AIM5
g4773	3.57	6.96	0.94	0.108	0.364	no	up	2.98	3.81	0.34	0.751	0.964	no	up	2.98	3.51	0.23	0.889	1	no	up	2.98	10.95	1.84	0.00905	0.0428	yes	up	solute carrier family 25 protein [Aspergillus ruber CBS 135680]	_	Mitochondrial carrier protein, putative	SLC25A20_29, CACT, CACL, CRC1
g4464	1.73	3.41	0.94	0.131	0.412	no	up	0.87	5.27	2.47	0.00177	0.0295	yes	up	0.87	1.53	0.75	0.433	0.974	no	up	0.87	1.43	0.66	0.413	0.633	no	up	HET-domain-containing protein [Aspergillus ruber CBS 135680]	_	_	_
g7996	625.51	1193.73	0.93	0.0909	0.327	no	up	567.96	1519.25	1.42	0.0486	0.306	no	up	567.96	342.2	-0.73	0.208	0.782	no	down	567.96	556.14	-0.03	0.953	0.983	no	down	hypothetical protein EURHEDRAFT_406851 [Aspergillus ruber CBS 135680]	_	_	_
g6857	61.37	117.31	0.93	0.0912	0.327	no	up	46.09	68.87	0.58	0.476	0.872	no	up	46.09	45.01	-0.03	0.84	1	no	down	46.09	100.38	1.12	0.0934	0.243	no	up	putative 50S ribosomal subunit L7 [Aspergillus ruber CBS 135680]	_	50S ribosomal subunit L7, putative	RP-L5, MRPL5, rplE
g2288	1572.15	2994.46	0.93	0.0915	0.327	no	up	1229.4	1596.44	0.38	0.682	0.946	no	up	1229.4	1333.3	0.12	0.978	1	no	up	1229.4	2532.37	1.04	0.117	0.284	no	up	ribosomal protein L28e [Aspergillus ruber CBS 135680]	_	Complex: L28 of R. norvegicus is a component of the 60S of the ribosome	RP-L28e, RPL28
g2727	32.09	61.4	0.93	0.0917	0.328	no	up	25.28	35.32	0.48	0.572	0.913	no	up	25.28	24.79	-0.03	0.85	1	no	down	25.28	46.01	0.86	0.198	0.404	no	up	WD40 repeat-like protein [Aspergillus ruber CBS 135680]	_	Small nucleolar ribonucleoprotein complex subunit (SOF1), putative	WDSOF1
g5238	1253.75	2386.36	0.93	0.0918	0.328	no	up	969.93	1329.56	0.45	0.597	0.917	no	up	969.93	948.53	-0.03	0.842	1	no	down	969.93	1937.42	1	0.134	0.309	no	up	40S ribosomal protein S6 [Aspergillus ruber CBS 135680]	_	40S ribosomal protein S6	RP-S6e, RPS6
g3190	6.4	12.32	0.93	0.0925	0.33	no	up	10.9	11.74	0.11	1	1	no	up	10.9	12.72	0.22	0.854	1	no	up	10.9	13.89	0.35	0.61	0.788	no	up	hypothetical protein EURHEDRAFT_413275 [Aspergillus ruber CBS 135680]	_	_	_
g2305	3105.52	5897.74	0.93	0.0927	0.33	no	up	2183.53	3242.64	0.57	0.481	0.875	no	up	2183.53	1996.04	-0.13	0.727	1	no	down	2183.53	3932.22	0.85	0.202	0.408	no	up	ribosomal protein L18e [Aspergillus ruber CBS 135680]	_	Ribosomal protein L18	RP-L18e, RPL18
g2483	8.48	16.29	0.93	0.0928	0.33	no	up	36.83	23.37	-0.65	0.247	0.706	no	down	36.83	3.91	-3.2	4.08e-06	0.00018	yes	down	36.83	6.03	-2.59	0.000184	0.00161	yes	down	glycosyl hydrolase family 76 protein [Aspergillus ruber CBS 135680]	_	Putative uncharacterized protein	E3.2.1.101
g3927	129.31	246.58	0.93	0.0932	0.331	no	up	68.81	175.37	1.35	0.0648	0.361	no	up	68.81	114.44	0.73	0.342	0.93	no	up	68.81	165.47	1.26	0.0612	0.181	no	up	like-Sm ribonucleo protein [Aspergillus ruber CBS 135680]	_	small nuclear ribonucleoprotein SmG, putative (AFU_orthologue; AFUA_8G04960)	SNRPG, SMG
g1766	23.5	44.87	0.93	0.0934	0.331	no	up	8.69	38.2	2.12	0.00325	0.0456	yes	up	8.69	14.79	0.76	0.324	0.919	no	up	8.69	22.35	1.35	0.0467	0.149	no	up	hypothetical protein EURHEDRAFT_408383 [Aspergillus ruber CBS 135680]	_	Pc16g12290	_
g3626	9.89	18.93	0.93	0.0939	0.332	no	up	5.43	15.53	1.5	0.0375	0.26	no	up	5.43	13.7	1.32	0.0673	0.43	no	up	5.43	31.6	2.52	0.000291	0.00242	yes	up	hypothetical protein EURHEDRAFT_472855 [Aspergillus ruber CBS 135680]	_	Contig An07c0190, complete genome	_
g7468	33.31	63.48	0.93	0.0948	0.335	no	up	34.76	34.9	0.01	0.883	0.988	no	up	34.76	56.71	0.7	0.361	0.94	no	up	34.76	67.54	0.96	0.155	0.342	no	up	hypothetical protein EURHEDRAFT_460805 [Aspergillus ruber CBS 135680]	_	MutT/nudix family protein (AFU_orthologue; AFUA_5G08240)	nudF
g3117	6.61	12.67	0.93	0.0951	0.336	no	up	1.94	5.14	1.36	0.0642	0.358	no	up	1.94	14.45	2.83	9.67e-05	0.00258	yes	up	1.94	10.95	2.44	0.000489	0.00378	yes	up	FAD/NAD(P)-binding domain-containing protein [Aspergillus ruber CBS 135680]	_	Salicylate hydroxylase	_
g1578	4.6	8.83	0.93	0.0956	0.337	no	up	2.59	5.03	0.93	0.214	0.666	no	up	2.59	5.15	0.96	0.195	0.763	no	up	2.59	9.73	1.87	0.00619	0.0311	yes	up	hypothetical protein EURHEDRAFT_447560 [Aspergillus ruber CBS 135680]	_	_	_
g5565	18.45	35.35	0.93	0.098	0.342	no	up	19.41	26.18	0.43	0.636	0.932	no	up	19.41	34.86	0.84	0.27	0.873	no	up	19.41	27.92	0.52	0.444	0.661	no	up	hypothetical protein EURHEDRAFT_415291 [Aspergillus ruber CBS 135680]	_	Predicted protein	_
g3264	22.89	43.78	0.93	0.103	0.354	no	up	0.84	17.02	4.19	8.88e-06	0.000513	yes	up	0.84	9.03	3.28	0.000534	0.0103	yes	up	0.84	8.25	3.15	0.000851	0.00606	yes	up	hypothetical protein EURHEDRAFT_529664 [Aspergillus ruber CBS 135680]	_	DUF636 domain protein	_
g2854	203.96	386.93	0.92	0.0933	0.331	no	up	96.93	236.62	1.29	0.0754	0.39	no	up	96.93	114.62	0.24	0.827	1	no	up	96.93	252.22	1.38	0.0395	0.131	no	up	centromere/microtubule-binding protein cbf5 [Aspergillus ruber CBS 135680]	_	Similarity to centromere/microtubule-binding protein Cbf5 - Saccharomyces cerevisiae	DKC1, NOLA4, CBF5
g4715	657.27	1243.15	0.92	0.0944	0.334	no	up	561.88	581.48	0.05	0.928	0.994	no	up	561.88	622.67	0.15	0.939	1	no	up	561.88	1378.82	1.29	0.0526	0.162	no	up	putative 1,3-beta-glucanosyltransferase [Aspergillus ruber CBS 135680]	_	1,3-beta-glucanosyltransferase, putative	_
g8094	10.23	19.44	0.92	0.0949	0.335	no	up	35.04	17.73	-0.98	0.1	0.457	no	down	35.04	12.21	-1.51	0.0163	0.16	no	down	35.04	13.99	-1.32	0.046	0.147	no	down	asparagine synthetase [Aspergillus ruber CBS 135680]	_	_	asnB, ASNS
g5990	36.41	68.8	0.92	0.0959	0.338	no	up	33.14	78.76	1.25	0.086	0.419	no	up	33.14	42.88	0.37	0.678	1	no	up	33.14	123.66	1.9	0.0052	0.0271	yes	up	14-alpha sterol demethylase Cyp51B [Aspergillus ruber CBS 135680]	_	14-alpha sterol demethylase14-alpha sterol demethylase Cyp51B ;(EC 1.14.13.-)	CYP51
g4642	24.54	46.43	0.92	0.096	0.338	no	up	21.17	25.48	0.27	0.814	0.977	no	up	21.17	37.81	0.83	0.265	0.865	no	up	21.17	44.72	1.08	0.107	0.267	no	up	TPR domain protein [Aspergillus ruber CBS 135680]	_	TPR domain protein	_
g5684	29.29	55.36	0.92	0.0963	0.339	no	up	18.7	30.41	0.7	0.371	0.813	no	up	18.7	21.61	0.21	0.87	1	no	up	18.7	54.95	1.55	0.0214	0.0835	no	up	ribosome biogenesis protein [Aspergillus ruber CBS 135680]	_	Ribosome biogenesis protein (Rrb1), putative	RRB1, GRWD1
g955	47.49	89.75	0.92	0.0967	0.34	no	up	42.81	62.21	0.54	0.517	0.89	no	up	42.81	47.64	0.15	0.935	1	no	up	42.81	84.82	0.98	0.141	0.321	no	up	hypothetical protein EURHEDRAFT_468165 [Aspergillus ruber CBS 135680]	_	Putative uncharacterized protein	MRPL54
g755	19.42	36.82	0.92	0.0972	0.341	no	up	5.57	14.97	1.41	0.0547	0.328	no	up	5.57	12.13	1.11	0.137	0.648	no	up	5.57	33.1	2.55	0.000288	0.0024	yes	up	Pkinase-domain-containing protein [Aspergillus ruber CBS 135680]	_	Function: MRS3	SLC25A26
g548	18.85	35.69	0.92	0.0979	0.342	no	up	28.11	23.6	-0.25	0.59	0.916	no	down	28.11	28.51	0.02	0.91	1	no	up	28.11	43.28	0.62	0.354	0.575	no	up	TIM21-domain-containing protein [Aspergillus ruber CBS 135680]	_	Putative uncharacterized protein	TIM21
g6778	82.09	155.38	0.92	0.0982	0.343	no	up	73.38	89.13	0.28	0.798	0.975	no	up	73.38	93.08	0.34	0.719	1	no	up	73.38	116.93	0.67	0.321	0.545	no	up	U6 snRNA-associated Sm-like protein LSm6, putative [Talaromyces marneffei ATCC 18224]	_	U6 snRNA-associated Sm-like protein LSm6, putative (AFU_orthologue; AFUA_6G06325)	LSM6
g1258	6.74	12.83	0.92	0.101	0.348	no	up	0.33	20.09	5.55	2.99e-11	1.58e-08	yes	up	0.33	3.08	2.89	0.000275	0.00604	yes	up	0.33	10.35	4.6	6.38e-09	1.56e-07	yes	up	FMN-linked oxidoreductase [Aspergillus ruber CBS 135680]	_	Pc16g00190	E1.-.-.-
g188	2.88	5.55	0.92	0.101	0.349	no	up	2.24	8.74	1.92	0.00761	0.0842	no	up	2.24	2.35	0.07	1	1	no	up	2.24	5.3	1.21	0.0732	0.205	no	up	Ser/Thr protein phosphatase family protein [Aspergillus ruber CBS 135680]	_	Ser/Thr protein phosphatase family protein	_
g433	7.55	14.36	0.92	0.112	0.372	no	up	4.34	7.62	0.8	0.338	0.792	no	up	4.34	5.98	0.45	0.63	1	no	up	4.34	13.03	1.56	0.0292	0.106	no	up	DUF726-domain-containing protein [Aspergillus ruber CBS 135680]	_	Predicted protein	_
g5454	8.94	17.02	0.92	0.125	0.401	no	up	11.63	21.68	0.89	0.274	0.734	no	up	11.63	19.84	0.77	0.362	0.94	no	up	11.63	35.91	1.62	0.0236	0.0899	no	up	_	_	_	_
g5569	1.03	2.04	0.92	0.131	0.412	no	up	0.66	2.05	1.5	0.0569	0.335	no	up	0.66	0.87	0.35	0.787	1	no	up	0.66	2.51	1.78	0.0143	0.0611	no	up	MFS general substrate transporter [Aspergillus ruber CBS 135680]	_	MFS multidrug transporter, putative	_
g3684	92.15	173.42	0.91	0.0975	0.341	no	up	46.29	108.52	1.23	0.0923	0.437	no	up	46.29	63.26	0.45	0.594	1	no	up	46.29	125.9	1.44	0.0321	0.113	no	up	hypothetical protein PVAR5_8497 [Byssochlamys spectabilis No. 5]	_	60S ribosomal protein L24b	RP-L24e, RPL24
g7736	100.31	188.39	0.91	0.0977	0.342	no	up	186.4	119.98	-0.64	0.257	0.716	no	down	186.4	192.09	0.04	0.933	1	no	up	186.4	290.71	0.64	0.335	0.558	no	up	fungal protein [Aspergillus ruber CBS 135680]	_	Afu5g09640 (Alt. Locus), conserved fungal protein	_
g2263	64.37	120.93	0.91	0.0978	0.342	no	up	41.62	59.14	0.51	0.545	0.901	no	up	41.62	56.12	0.43	0.613	1	no	up	41.62	108.32	1.38	0.0396	0.131	no	up	homoaconitase LysF [Aspergillus ruber CBS 135680]	_	Homoaconitase, mitochondrial Precursor (EC 4.2.1.36)(Homoaconitate hydratase); Responsible f [...]	LYS4
g7087	13.54	25.49	0.91	0.102	0.35	no	up	7.37	23.65	1.67	0.0212	0.178	no	up	7.37	12.26	0.73	0.346	0.931	no	up	7.37	23.56	1.66	0.0148	0.063	no	up	hypothetical protein EURHEDRAFT_449586 [Aspergillus ruber CBS 135680]	_	Pc13g01470	_
g1938	3.58	6.81	0.91	0.103	0.352	no	up	13.06	7.41	-0.81	0.168	0.595	no	down	13.06	4.13	-1.64	0.0106	0.115	no	down	13.06	5.82	-1.15	0.0814	0.22	no	down	endoglucanase [Aspergillus ruber CBS 135680]	_	Similarity to hypothetical endoglucanase IV - Trichoderma reesei Precursor	_
g6458	7.82	14.83	0.91	0.104	0.356	no	up	5.3	4.14	-0.35	0.523	0.893	no	down	5.3	6.02	0.18	0.915	1	no	up	5.3	18.42	1.78	0.00997	0.0463	yes	up	oxidoreductase [Aspergillus ruber CBS 135680]	_	Putative uncharacterized protein	E1.14.11.2
g104	0.95	1.87	0.91	0.124	0.399	no	up	4.64	6.32	0.44	0.623	0.928	no	up	4.64	0.82	-2.37	0.000573	0.011	yes	down	4.64	1.88	-1.26	0.0617	0.181	no	down	endonuclease/exonuclease/phosphatase family protein, partial [Aspergillus ruber CBS 135680]	_	Endonuclease/exonuclease/phosphatase family protein	_
g5475	0.77	1.54	0.91	0.144	0.434	no	up	0.08	0.36	0	1	1	no	no change	0.08	0.2	0	1	1	no	no change	0.08	0.49	0	1	1	no	no change	hypothetical protein EURHEDRAFT_428051, partial [Aspergillus ruber CBS 135680]	_	_	_
g5012	2.65	5.05	0.91	0.259	0.594	no	up	5.44	4.74	-0.19	0.778	0.971	no	down	5.44	10.09	0.88	0.333	0.926	no	up	5.44	8.36	0.61	0.439	0.656	no	up	_	_	_	_
g2872	305.04	569.94	0.9	0.0997	0.347	no	up	172.41	304.64	0.82	0.278	0.739	no	up	172.41	295.4	0.78	0.302	0.905	no	up	172.41	415.12	1.27	0.0578	0.173	no	up	seryl-tRNA synthetase [Aspergillus ruber CBS 135680]	_	Seryl-tRNA synthetase	SARS, serS
g1893	83.37	155.84	0.9	0.1	0.348	no	up	53.78	82.99	0.62	0.432	0.849	no	up	53.78	62.17	0.21	0.867	1	no	up	53.78	148.59	1.46	0.0292	0.106	no	up	60S ribosomal protein L3 [Aspergillus ruber CBS 135680]	_	Ribonuclease III domain proteins	_
g2829	48.38	90.52	0.9	0.1	0.348	no	up	64.77	79.13	0.29	0.785	0.974	no	up	64.77	86.77	0.42	0.623	1	no	up	64.77	137.61	1.09	0.104	0.262	no	up	putative endoplasmic reticulum DnaJ domain protein Erj5 [Aspergillus ruber CBS 135680]	_	Putative uncharacterized protein	_
g3815	287.64	537.44	0.9	0.1	0.348	no	up	163.91	385.06	1.23	0.0908	0.435	no	up	163.91	330.14	1.01	0.168	0.71	no	up	163.91	423.58	1.37	0.0414	0.136	no	up	hypothetical protein EURHEDRAFT_411622 [Aspergillus ruber CBS 135680]	_	Mitochondrial 37S ribosomal protein S27, putative	MRPS33
g2394	93.01	173.96	0.9	0.101	0.35	no	up	59.44	97.27	0.71	0.364	0.809	no	up	59.44	79.99	0.43	0.619	1	no	up	59.44	132.22	1.15	0.0864	0.229	no	up	ribosomal protein L14 [Aspergillus ruber CBS 135680]	_	50S ribosomal protein L14	_
g7457	80.25	149.62	0.9	0.102	0.35	no	up	43.89	86.81	0.98	0.187	0.627	no	up	43.89	57.1	0.38	0.671	1	no	up	43.89	122.36	1.48	0.0281	0.102	no	up	hypothetical protein EURHEDRAFT_414713 [Aspergillus ruber CBS 135680]	_	Putative uncharacterized protein	_
g6333	16.04	30	0.9	0.102	0.351	no	up	13.99	22.92	0.71	0.363	0.808	no	up	13.99	20.13	0.52	0.521	0.998	no	up	13.99	29.85	1.09	0.104	0.262	no	up	peptidyl-prolyl isomerase cwc27 [Aspergillus ruber CBS 135680]	_	Peptidyl-prolyl cis-trans isomerase, putative	SDCCAG10
g7701	57.84	107.73	0.9	0.102	0.352	no	up	42.36	47.9	0.18	0.921	0.993	no	up	42.36	50.47	0.25	0.817	1	no	up	42.36	85.69	1.01	0.129	0.302	no	up	37S ribosomal protein S11 [Aspergillus ruber CBS 135680]	_	37S ribosomal protein S11, putative	RP-S11, MRPS11, rpsK
g1090	145.14	270.16	0.9	0.103	0.352	no	up	72.64	128.13	0.82	0.285	0.748	no	up	72.64	132.98	0.87	0.244	0.843	no	up	72.64	227.6	1.65	0.0151	0.0641	no	up	putative iron-sulfur cluster biosynthesis protein Isd11 [Aspergillus ruber CBS 135680]	_	Iron-sulfur cluster biosynthesis protein Isd11, putative	_
g2223	12.66	23.72	0.9	0.104	0.356	no	up	12.52	18.54	0.56	0.494	0.88	no	up	12.52	12.79	0.03	0.924	1	no	up	12.52	20.64	0.72	0.288	0.509	no	up	DUF947-domain-containing protein [Aspergillus ruber CBS 135680]	_	Putative uncharacterized protein	RRP36
g7135	13.85	25.98	0.9	0.105	0.358	no	up	9.81	17.62	0.84	0.277	0.739	no	up	9.81	25.25	1.36	0.0619	0.407	no	up	9.81	34.39	1.8	0.00868	0.0414	yes	up	hypothetical protein EURHEDRAFT_528745 [Aspergillus ruber CBS 135680]	_	Putative uncharacterized protein	_
g2502	10.47	19.56	0.9	0.131	0.411	no	up	9.45	13.7	0.53	0.569	0.913	no	up	9.45	15.59	0.72	0.389	0.961	no	up	9.45	23.96	1.33	0.0646	0.187	no	up	hypothetical protein EURHEDRAFT_410771 [Aspergillus ruber CBS 135680]	_	Afu6g02705 (Alt. Locus), conserved hypothetical protein	_
g4873	87.57	162.78	0.89	0.102	0.352	no	up	119.04	119.41	0	0.874	0.987	no	up	119.04	41	-1.54	0.0148	0.148	no	down	119.04	94.98	-0.33	0.61	0.788	no	down	stomatin family protein [Aspergillus ruber CBS 135680]	_	Remark: alternate names for the human stomatin protein: EPB72	_
g167	69.02	128.41	0.89	0.103	0.352	no	up	55.67	76.47	0.46	0.596	0.917	no	up	55.67	60.35	0.12	0.98	1	no	up	55.67	121.05	1.12	0.0939	0.244	no	up	ribosomal protein L22 [Aspergillus ruber CBS 135680]	_	Afu2g01830 (Alt. Locus), conserved hypothetical protein	_
g2736	80.36	149.33	0.89	0.103	0.352	no	up	80.96	130.31	0.69	0.379	0.822	no	up	80.96	79.89	-0.02	0.858	1	no	down	80.96	127.01	0.65	0.33	0.553	no	up	protein arginine n-methyltransferase 1 [Aspergillus ruber CBS 135680]	_	Protein arginine n-methyltransferase 1	PRMT1
g4452	17.01	31.68	0.89	0.103	0.352	no	up	16.28	31.29	0.94	0.208	0.659	no	up	16.28	21.3	0.39	0.661	1	no	up	16.28	40.95	1.33	0.0474	0.15	no	up	C6 finger domain protein [Aspergillus fumigatus Af293]	_	Afu4g11850 (Alt. Locus), C6 finger domain protein, putative	_
g6667	16.64	30.99	0.89	0.103	0.352	no	up	6.76	17.13	1.33	0.0664	0.365	no	up	6.76	10.18	0.58	0.462	0.981	no	up	6.76	21.62	1.66	0.0139	0.0598	no	up	TRAUB-domain-containing protein [Aspergillus ruber CBS 135680]	_	Putative uncharacterized protein	AATF, BFR2
g4647	837	1547.73	0.89	0.104	0.356	no	up	754.08	958.46	0.35	0.717	0.952	no	up	754.08	630.63	-0.26	0.586	1	no	down	754.08	1207.14	0.68	0.307	0.531	no	up	GBLP_NEUCR guanine nucleotide-binding protein beta subunit-like protein [Aspergillus ruber CBS 135680]	_	guanine nucleotide-binding protein subunit beta protein cpcB (Eurofung)	RACK1
g5488	280.62	518.66	0.89	0.105	0.356	no	up	315.46	287.97	-0.13	0.713	0.951	no	down	315.46	354.31	0.17	0.916	1	no	up	315.46	479.35	0.6	0.365	0.585	no	up	succinyl-CoA ligase beta-chain mitochondrial precursor [Aspergillus ruber CBS 135680]	_	Catalytic activity: GTP + succinate + CoA = GDP + succinyl-CoA + phosphate. (EC 6.2.1.4)	LSC2
g4392	9.26	17.19	0.89	0.105	0.358	no	up	8.24	14.08	0.77	0.317	0.776	no	up	8.24	20.26	1.29	0.0728	0.45	no	up	8.24	34.69	2.06	0.00251	0.0148	yes	up	hypothetical protein EURHEDRAFT_379883 [Aspergillus ruber CBS 135680]	_	Function: UaY of A. nidulans binds to the consensus sequence 5'-tcggnnnnnnccga-3'	_
g2441	18.66	34.65	0.89	0.106	0.359	no	up	11.57	31.19	1.42	0.0498	0.309	no	up	11.57	16.79	0.53	0.514	0.995	no	up	11.57	32.39	1.48	0.0291	0.105	no	up	arginine N-methyltransferase 2 [Aspergillus ruber CBS 135680]	_	Arginine N-methyltransferase 2 (EC 2.1.1.-); Delta-N-monomethylarginine transferase. May mon [...]	RMT2
g3325	6.71	12.54	0.89	0.106	0.36	no	up	5.82	11.79	1.01	0.178	0.615	no	up	5.82	7.21	0.3	0.763	1	no	up	5.82	13.36	1.19	0.0785	0.214	no	up	putative MYND domain protein [Aspergillus ruber CBS 135680]	_	Putative uncharacterized protein	_
g5032	10	18.63	0.89	0.109	0.367	no	up	6.92	12.12	0.8	0.308	0.768	no	up	6.92	8.04	0.21	0.884	1	no	up	6.92	15.42	1.14	0.0956	0.247	no	up	III, C31 subunit of DNA-directed RNA polymerase [Aspergillus ruber CBS 135680]	_	Putative uncharacterized protein	RPC7, POLR3G
g4466	9.26	17.28	0.89	0.111	0.37	no	up	3.34	9.29	1.45	0.0529	0.32	no	up	3.34	4.93	0.55	0.528	1	no	up	3.34	4.28	0.35	0.644	0.808	no	up	ClpP/crotonase [Aspergillus ruber CBS 135680]	_	Putative uncharacterized protein	_
g5814	2.87	5.4	0.89	0.112	0.372	no	up	11.92	18.1	0.6	0.456	0.861	no	up	11.92	1.87	-2.61	0.000123	0.00314	yes	down	11.92	7.83	-0.6	0.358	0.579	no	down	sugar transporter [Aspergillus ruber CBS 135680]	_	Sugar transporter	_
g7040	1.6	3.05	0.89	0.259	0.594	no	up	0.78	2.35	0	1	1	no	no change	0.78	0.46	0	1	1	no	no change	0.78	1.68	0	1	1	no	no change	_	_	_	_
g2221	331.38	611	0.88	0.106	0.359	no	up	602.06	509.59	-0.24	0.593	0.917	no	down	602.06	470.76	-0.35	0.489	0.988	no	down	602.06	327.04	-0.88	0.177	0.376	no	down	translation elongation factor eEF-1 subunit gamma [Aspergillus ruber CBS 135680]	_	Afu6g04570 (Alt. Locus), translation elongation factor eEF-1 subunit gamma, putative	EEF1G
g4070	44.03	81.3	0.88	0.106	0.36	no	up	49.72	42.39	-0.23	0.607	0.919	no	down	49.72	67.94	0.45	0.593	1	no	up	49.72	88.51	0.83	0.213	0.422	no	up	hypothetical protein ANI_1_1700094 [Aspergillus niger CBS 513.88]	_	Similarity to hypothetical protein CAD70545.1 - Neurospora crassa	_
g1485	84.48	155.37	0.88	0.107	0.362	no	up	100.83	67.84	-0.57	0.301	0.765	no	down	100.83	91.57	-0.14	0.717	1	no	down	100.83	120.91	0.26	0.699	0.843	no	up	DnaJ domain protein [Aspergillus ruber CBS 135680]	_	Contig An12c0060, complete genome	_
g6835	23.63	43.49	0.88	0.107	0.363	no	up	30	44.03	0.55	0.499	0.882	no	up	30	47.75	0.67	0.384	0.958	no	up	30	75.18	1.32	0.0478	0.151	no	up	sexual development transcription factor SteA [Aspergillus ruber CBS 135680]	_	Sexual development transcription factor SteA	STE12
g2278	96.2	176.78	0.88	0.107	0.363	no	up	68.12	84.02	0.3	0.768	0.968	no	up	68.12	108.81	0.67	0.379	0.954	no	up	68.12	163.16	1.26	0.0595	0.177	no	up	hypothetical protein EURHEDRAFT_513842 [Aspergillus ruber CBS 135680]	_	Translocase of outer mitochondrial membrane complex	TOM40
g7807	13.12	24.28	0.88	0.108	0.363	no	up	13.27	6.61	-0.99	0.0991	0.455	no	down	13.27	5.52	-1.25	0.0443	0.327	no	down	13.27	16.87	0.34	0.612	0.789	no	up	glucose dehydrogenase [Aspergillus ruber CBS 135680]	_	Glucose-methanol-choline (Gmc) oxidoreductase, putative	_
g7898	51.88	95.43	0.88	0.108	0.363	no	up	29.99	67.57	1.17	0.11	0.477	no	up	29.99	44.44	0.57	0.478	0.987	no	up	29.99	86.3	1.52	0.0237	0.0902	no	up	Arginine biosynthesis bifunctional protein ArgJ beta chain [Aspergillus ruber CBS 135680]	_	Afu5g08120 (Alt. Locus), arginine biosynthesis bifunctional protein ArgJ, (2.3.1.35)	argJ
g8022	151.72	278.77	0.88	0.108	0.363	no	up	44.1	152.76	1.79	0.0125	0.122	no	up	44.1	116.17	1.4	0.0519	0.364	no	up	44.1	202.5	2.2	0.0014	0.00916	yes	up	mitochondrial import inner membrane translocase subunit tim9 [Aspergillus ruber CBS 135680]	_	Mitochondrial import inner membrane translocase subunit tim9	TIM9
g4099	25.34	46.56	0.88	0.109	0.365	no	up	21.99	36.9	0.74	0.334	0.789	no	up	21.99	25.55	0.22	0.859	1	no	up	21.99	40.33	0.87	0.19	0.393	no	up	hypothetical protein EURHEDRAFT_459333 [Aspergillus ruber CBS 135680]	_	Pre-rRNA processing protein Esf1, putative	_
g375	38.5	70.8	0.88	0.109	0.365	no	up	46.83	49.97	0.09	0.983	1	no	up	46.83	38.48	-0.28	0.562	1	no	down	46.83	71.92	0.62	0.355	0.576	no	up	GATA transcription factor [Aspergillus ruber CBS 135680]	_	GATA transcription factor (AreB), putative	GATAF
g3747	24.18	44.45	0.88	0.109	0.367	no	up	8.16	3.02	-1.4	0.0277	0.212	no	down	8.16	63.48	2.94	5.24e-05	0.00155	yes	up	8.16	53.43	2.7	0.00012	0.00111	yes	up	integral membrane protein [Aspergillus ruber CBS 135680]	_	Predicted protein	_
g989	9.27	17.11	0.88	0.11	0.368	no	up	13.2	20.44	0.63	0.43	0.848	no	up	13.2	15.86	0.26	0.805	1	no	up	13.2	31.47	1.25	0.0628	0.184	no	up	ALG6, ALG8 glycosyltransferase [Aspergillus ruber CBS 135680]	_	Glucosyltransferase - Alg6p	ALG6
g7285	58.18	107.13	0.88	0.113	0.374	no	up	52.61	73.35	0.48	0.581	0.914	no	up	52.61	77.44	0.56	0.498	0.99	no	up	52.61	157.71	1.58	0.0201	0.0796	no	up	hypothetical protein EURHEDRAFT_381680 [Aspergillus ruber CBS 135680]	_	_	_
g3478	5.42	10.06	0.88	0.115	0.379	no	up	5.29	5.6	0.08	0.985	1	no	up	5.29	3.26	-0.68	0.261	0.863	no	down	5.29	6.24	0.23	0.754	0.877	no	up	RTA1-domain-containing protein [Aspergillus ruber CBS 135680]	_	Predicted protein	_
g2203	2.97	5.5	0.87	0.11	0.367	no	up	1.54	19.76	3.6	1e-06	8.28e-05	yes	up	1.54	0.98	-0.6	0.28	0.884	no	down	1.54	10.04	2.63	0.000134	0.00123	yes	up	ABC drug exporter AtrF [Aspergillus ruber CBS 135680]	_	Pleiotropic drug resistance proteins	_
g230	81.07	148.28	0.87	0.11	0.368	no	up	33.29	163.96	2.3	0.00135	0.0238	yes	up	33.29	35.98	0.11	0.985	1	no	up	33.29	105.76	1.66	0.0136	0.0587	no	up	RNA helicase Dbp [Aspergillus kawachii IFO 4308]	_	ATP-dependent RNA helicase dbp2 (EC 3.6.1.-); ATP-dependent RNA helicase involved nonsense-m [...]	DDX5, DBP2
g6367	1015.77	1852.56	0.87	0.111	0.369	no	up	860.48	978.3	0.19	0.907	0.99	no	up	860.48	913.65	0.09	0.985	1	no	up	860.48	1581.9	0.88	0.186	0.388	no	up	hypothetical protein EURHEDRAFT_412949 [Aspergillus ruber CBS 135680]	_	Contig An02c0200, complete genome	SERBP1
g5506	31.53	57.87	0.87	0.111	0.371	no	up	48.71	51.91	0.09	0.98	1	no	up	48.71	55.48	0.19	0.894	1	no	up	48.71	88.3	0.86	0.2	0.407	no	up	hypothetical protein EURHEDRAFT_415369 [Aspergillus ruber CBS 135680]	_	_	_
g6638	9.36	17.19	0.87	0.112	0.371	no	up	5.76	14.26	1.29	0.074	0.387	no	up	5.76	10.4	0.84	0.262	0.863	no	up	5.76	30.74	2.4	0.000527	0.00402	yes	up	small oligopeptide transporter [Aspergillus ruber CBS 135680]	_	Sexual differentiation process protein ISP4	_
g973	8.37	15.35	0.87	0.115	0.377	no	up	0.83	0.8	-0.05	0.891	0.988	no	down	0.83	2.53	1.5	0.0392	0.301	no	up	0.83	36.89	5.31	1.83e-11	7.24e-10	yes	up	integral membrane protein [Aspergillus ruber CBS 135680]	_	_	_
g981	1.04	1.98	0.87	0.187	0.494	no	up	0.23	0.25	0	1	1	no	no change	0.23	0.3	0	1	1	no	no change	0.23	7.57	4.54	3.6e-07	6.35e-06	yes	up	hypothetical protein NFIA_080510 [Neosartorya fischeri NRRL 181]	_	Putative uncharacterized protein	_
g5481	1704.37	3097.01	0.86	0.113	0.373	no	up	1557.22	1704.83	0.13	0.974	1	no	up	1557.22	1313.88	-0.25	0.6	1	no	down	1557.22	2663.25	0.77	0.244	0.46	no	up	hypothetical protein EURHEDRAFT_380094 [Aspergillus ruber CBS 135680]	_	60S ribosomal protein L13	RP-L13e, RPL13
g2428	70.3	128.08	0.86	0.113	0.373	no	up	50.09	67.13	0.42	0.637	0.932	no	up	50.09	51.83	0.05	0.941	1	no	up	50.09	101.7	1.02	0.127	0.298	no	up	putative exosome complex endonuclease 2/ribosomal RNA processing protein [Aspergillus ruber CBS 135680]	_	Exosome complex endonuclease 2/ribosomal RNA processing protein, putative	RRP45, EXOSC9
g1743	78.47	142.99	0.86	0.113	0.373	no	up	67.64	99.3	0.55	0.501	0.884	no	up	67.64	87.01	0.36	0.689	1	no	up	67.64	144.38	1.09	0.102	0.26	no	up	DNA-directed RNA polymerases I, II, and III subunit RPABC1 [Aspergillus ruber CBS 135680]	_	Catalytic activity: Nucleoside triphosphate + RNA(n) = Pyrophosphate + RNA(n+1) (EC 2.7.7.6)	RPB5, POLR2E
g4396	1461.02	2651.97	0.86	0.113	0.374	no	up	2750.3	961.32	-1.52	0.0152	0.14	no	down	2750.3	1076.16	-1.35	0.0294	0.249	no	down	2750.3	1138.58	-1.27	0.0536	0.164	no	down	hypothetical protein EURHEDRAFT_404909 [Aspergillus ruber CBS 135680]	_	_	_
g499	82.78	150.44	0.86	0.113	0.374	no	up	96.75	113.47	0.23	0.854	0.982	no	up	96.75	88.82	-0.12	0.736	1	no	down	96.75	169.4	0.81	0.225	0.437	no	up	ketoreductase [Aspergillus ruber CBS 135680]	_	3-ketoacyl-CoA reductase (3-ketoreductase)(KAR)(EC 1.1.1.-)(Microsomal beta-keto-reductase); [...]	HSD17B12, KAR, IFA38
g7824	28.72	52.38	0.86	0.113	0.374	no	up	17.22	40.85	1.24	0.0889	0.428	no	up	17.22	33.26	0.95	0.201	0.772	no	up	17.22	56.16	1.7	0.0121	0.0536	no	up	DUF1275 domain protein [Aspergillus ruber CBS 135680]	_	Afu5g13060 (Alt. Locus), DUF1275 domain protein, contains a DUF1275 domain	_
g6074	7.13	13	0.86	0.114	0.375	no	up	8.24	11.58	0.49	0.563	0.91	no	up	8.24	17.14	1.05	0.149	0.671	no	up	8.24	24.65	1.57	0.0193	0.0776	no	up	telomerase reverse transcriptase, putative [Aspergillus flavus NRRL3357]	_	Telomerase reverse transcriptase, putative	TERT, EST2
g1714	87.56	158.75	0.86	0.114	0.375	no	up	81.4	106.33	0.39	0.673	0.942	no	up	81.4	95.67	0.23	0.837	1	no	up	81.4	193.63	1.25	0.0613	0.181	no	up	actin-like ATPase domain-containing protein [Aspergillus ruber CBS 135680]	_	Hsp70 family chaperone Lhs1/Orp150, putative	HYOU1
g4311	59.53	108.45	0.86	0.114	0.376	no	up	27.18	86.15	1.66	0.0214	0.179	no	up	27.18	75.13	1.46	0.0424	0.316	no	up	27.18	104.65	1.94	0.00456	0.0244	yes	up	DNL zinc finger domain protein [Aspergillus ruber CBS 135680]	_	Mitochondrial import protein Zim17, putative	ZIM17, DNLZ, Tim15
g4216	22.08	40.16	0.86	0.115	0.377	no	up	20.02	25.19	0.33	0.737	0.959	no	up	20.02	44.25	1.14	0.116	0.591	no	up	20.02	75.65	1.91	0.00496	0.0262	yes	up	putative NADH-dependent flavin oxidoreductase [Aspergillus ruber CBS 135680]	_	NADH-dependent flavin oxidoreductase, putative	E1.-.-.-
g5950	31.88	58	0.86	0.115	0.377	no	up	30.23	31.85	0.08	0.964	1	no	up	30.23	33.23	0.14	0.958	1	no	up	30.23	76.48	1.34	0.0466	0.148	no	up	hypothetical protein EURHEDRAFT_414568 [Aspergillus ruber CBS 135680]	_	Putative uncharacterized protein	_
g2616	14.44	26.31	0.86	0.115	0.379	no	up	15.28	17.05	0.16	0.943	0.997	no	up	15.28	24.22	0.66	0.395	0.961	no	up	15.28	34.47	1.17	0.0811	0.219	no	up	putative AAA family ATPase [Aspergillus ruber CBS 135680]	_	Putative uncharacterized protein	ycaJ
g3813	107.97	195.44	0.86	0.116	0.38	no	up	313.29	267.43	-0.23	0.607	0.919	no	down	313.29	151.08	-1.05	0.0827	0.487	no	down	313.29	197.93	-0.66	0.307	0.531	no	down	ER lumen protein retaining receptor [Aspergillus ruber CBS 135680]	_	ER lumen protein retaining receptor ; Required for the retention of luminal endoplasmic reti [...]	KDELR
g4337	36.22	65.65	0.86	0.118	0.385	no	up	32.03	50.93	0.67	0.398	0.83	no	up	32.03	34.29	0.1	1	1	no	up	32.03	37.46	0.23	0.746	0.872	no	up	RNA binding protein Pym, putative [Aspergillus oryzae 3.042]	_	RNA binding protein Pym, putative	WIBG, PYM
g417	31.36	56.82	0.86	0.121	0.392	no	up	32.83	36.49	0.15	0.951	0.997	no	up	32.83	49.19	0.58	0.468	0.981	no	up	32.83	65.31	0.99	0.143	0.324	no	up	putative peptidyl prolyl cis-trans isomerase cyclophilin [Aspergillus ruber CBS 135680]	_	Peptidyl prolyl cis-trans isomerase Cyclophilin, putative	_
g1227	25.52	46.22	0.85	0.116	0.381	no	up	14.54	35.54	1.28	0.0774	0.397	no	up	14.54	21.47	0.56	0.487	0.988	no	up	14.54	29.87	1.03	0.123	0.291	no	up	DnaJ-domain-containing protein [Aspergillus ruber CBS 135680]	_	Putative uncharacterized protein	DNAJA5
g7250	15.46	28.03	0.85	0.116	0.381	no	up	13.11	15.4	0.23	0.853	0.982	no	up	13.11	15.6	0.25	0.819	1	no	up	13.11	36.69	1.48	0.0281	0.102	no	up	translation factor guf1, mitochondrial [Aspergillus ruber CBS 135680]	_	GTP-binding protein GUF1	_
g1735	174.6	314.89	0.85	0.116	0.381	no	up	83.66	193.8	1.21	0.0957	0.446	no	up	83.66	80.06	-0.06	0.806	1	no	down	83.66	229.07	1.45	0.0304	0.109	no	up	Fibrillarin [Aspergillus ruber CBS 135680]	_	Fibrillarin	NOP1, FBL
g2864	32.81	59.18	0.85	0.117	0.383	no	up	11.86	48.77	2.03	0.00445	0.0574	no	up	11.86	37.07	1.64	0.0213	0.196	no	up	11.86	55.98	2.23	0.00114	0.00776	yes	up	aspartokinase [Aspergillus ruber CBS 135680]	_	Aspartokinase (EC 2.7.2.4)	lysC
g6344	2134.16	3841.76	0.85	0.117	0.383	no	up	1907.75	2454.78	0.36	0.697	0.949	no	up	1907.75	3439.76	0.85	0.252	0.851	no	up	1907.75	3088.99	0.7	0.296	0.519	no	up	glyceraldehyde-3-phosphate dehydrogenase [Aspergillus ruber CBS 135680]	_	Glyceraldehyde-3-phosphate dehydrogenase (GAPDH)(EC 1.2.1.12)	GAPDH, gapA
g824	46.31	83.38	0.85	0.118	0.384	no	up	17.3	141.09	3.02	3.28e-05	0.00133	yes	up	17.3	63.99	1.88	0.00804	0.0942	no	up	17.3	126.48	2.86	4.49e-05	0.000468	yes	up	DUF1212-domain-containing protein [Aspergillus ruber CBS 135680]	_	Putative uncharacterized protein	_
g6814	41.16	74.14	0.85	0.118	0.384	no	up	52.07	49.12	-0.08	0.769	0.968	no	down	52.07	95.07	0.87	0.242	0.842	no	up	52.07	110.39	1.08	0.104	0.263	no	up	putative serine/threonine protein kinase [Aspergillus ruber CBS 135680]	_	Serine/threonine protein kinase, putative	E2.7.11.-
g7132	1323.14	2379.25	0.85	0.118	0.384	no	up	817.37	1404.22	0.78	0.306	0.766	no	up	817.37	901.07	0.14	0.949	1	no	up	817.37	1706.53	1.06	0.111	0.272	no	up	ribosomal protein L14b/L23e [Aspergillus ruber CBS 135680]	_	Pc18g03860	RP-L23e, RPL23
g6620	24.04	43.31	0.85	0.12	0.39	no	up	24.32	60.44	1.31	0.0706	0.377	no	up	24.32	20.75	-0.23	0.622	1	no	down	24.32	50.72	1.06	0.114	0.277	no	up	putative amino acid transporter [Aspergillus ruber CBS 135680]	_	Amino acid transporter, putative	_
g621	2.37	4.35	0.85	0.123	0.397	no	up	3.71	8.07	1.1	0.135	0.528	no	up	3.71	1.98	-0.87	0.15	0.671	no	down	3.71	0.49	-2.69	0.00014	0.00128	yes	down	glycosyl hydrolase [Aspergillus ruber CBS 135680]	_	Putative alpha-1	_
g8264	5.98	10.88	0.85	0.123	0.398	no	up	25.59	9.67	-1.39	0.0255	0.203	no	down	25.59	15.38	-0.73	0.212	0.788	no	down	25.59	12.09	-1.08	0.103	0.261	no	down	hypothetical protein EURHEDRAFT_467889 [Aspergillus ruber CBS 135680]	_	Putative C2H2 finger domain transcription factor (Eurofung)	_
g7481	13.53	24.44	0.85	0.124	0.399	no	up	4.85	4.66	-0.06	0.842	0.982	no	down	4.85	6.76	0.47	0.595	1	no	up	4.85	10.51	1.1	0.117	0.282	no	up	hypothetical protein EURHEDRAFT_382098 [Aspergillus ruber CBS 135680]	_	Putative uncharacterized protein	_
g5121	5.63	10.22	0.85	0.131	0.411	no	up	4.59	1.71	-1.37	0.0411	0.275	no	down	4.59	5.57	0.27	0.817	1	no	up	4.59	8.87	0.94	0.175	0.372	no	up	putative short-chain dehydrogenase/reductase 2 [Aspergillus ruber CBS 135680]	_	Afu8g02600 (Alt. Locus), short-chain dehydrogenase/reductase 2, putative	_
g7299	0.41	0.82	0.85	0.167	0.466	no	up	0.77	0.47	-0.61	0.371	0.814	no	down	0.77	1.01	0.35	0.727	1	no	up	0.77	2.36	1.5	0.0337	0.117	no	up	putative sugar transporter [Aspergillus ruber CBS 135680]	_	Sugar transporter, putative	_
g7863	7.69	13.89	0.84	0.119	0.387	no	up	6.33	14.3	1.16	0.109	0.477	no	up	6.33	12.88	1.01	0.164	0.699	no	up	6.33	22.45	1.81	0.00733	0.036	yes	up	DNA repair protein RAD5 [Aspergillus ruber CBS 135680]	_	DNA excision repair protein (Rad5), putative	RAD5
g6124	109.76	197.02	0.84	0.119	0.388	no	up	139.8	131.54	-0.09	0.765	0.968	no	down	139.8	142.86	0.03	0.919	1	no	up	139.8	190.63	0.45	0.504	0.71	no	up	hypothetical protein EURHEDRAFT_408746 [Aspergillus ruber CBS 135680]	_	NADH-ubiquinone oxidoreductase 9.5 kDa subunit, putative (AFU_orthologue; AFUA_5G08980)	_
g294	64.56	115.37	0.84	0.122	0.395	no	up	27.76	81.65	1.55	0.0308	0.227	no	up	27.76	38.01	0.45	0.594	1	no	up	27.76	79.63	1.52	0.0245	0.0922	no	up	hypothetical protein EURHEDRAFT_409833 [Aspergillus ruber CBS 135680]	_	rRNA assembly protein Mis3, putative	KRR1
g5007	9.89	17.73	0.84	0.122	0.395	no	up	9.22	11.99	0.38	0.682	0.946	no	up	9.22	12.83	0.47	0.568	1	no	up	9.22	23.79	1.36	0.0423	0.138	no	up	putative translation elongation factor G2 [Aspergillus ruber CBS 135680]	_	Translation elongation factor G2, putative	fusA, GFM, EFG
g2965	10.4	18.69	0.84	0.122	0.396	no	up	5.86	10.59	0.84	0.268	0.728	no	up	5.86	14.36	1.28	0.0767	0.464	no	up	5.86	20.44	1.79	0.00869	0.0414	yes	up	diphthamide biosynthesis protein 2 [Aspergillus ruber CBS 135680]	_	Diphthamide biosynthesis protein Dph2, putative	DPH2
g4051	35.56	63.63	0.84	0.123	0.398	no	up	19.2	52.5	1.45	0.0455	0.292	no	up	19.2	25.93	0.43	0.617	1	no	up	19.2	57.39	1.57	0.0198	0.079	no	up	hypothetical protein EURHEDRAFT_411111 [Aspergillus ruber CBS 135680]	_	_	_
g8200	6.37	11.5	0.84	0.127	0.404	no	up	7.51	9.13	0.28	0.802	0.975	no	up	7.51	5.35	-0.48	0.394	0.961	no	down	7.51	10.03	0.41	0.547	0.742	no	up	hypothetical protein EURHEDRAFT_417414 [Aspergillus ruber CBS 135680]	_	AAR2 family protein	AAR2, C20orf4
g6304	5.56	10	0.84	0.127	0.404	no	up	7.91	13.92	0.81	0.291	0.757	no	up	7.91	5.1	-0.62	0.279	0.882	no	down	7.91	12.38	0.64	0.34	0.562	no	up	MFS alpha-glucoside transporter [Aspergillus ruber CBS 135680]	_	Predicted transporter	_
g6554	6.56	11.85	0.84	0.138	0.422	no	up	6.24	11.97	0.93	0.234	0.691	no	up	6.24	12.46	0.99	0.197	0.765	no	up	6.24	9.23	0.56	0.434	0.651	no	up	hypothetical protein EURHEDRAFT_409159 [Aspergillus ruber CBS 135680]	_	_	_
g2385	8.59	15.42	0.84	0.14	0.426	no	up	10.19	9.02	-0.17	0.697	0.949	no	down	10.19	11.5	0.17	0.927	1	no	up	10.19	21.43	1.07	0.119	0.286	no	up	integral membrane protein [Aspergillus ruber CBS 135680]	_	Integral membrane protein	_
g8217	1.12	2.09	0.84	0.163	0.461	no	up	2.06	1.6	-0.35	0.556	0.906	no	down	2.06	2.77	0.41	0.66	1	no	up	2.06	3.08	0.56	0.447	0.662	no	up	hypothetical protein ASPNIDRAFT_173029 [Aspergillus niger ATCC 1015]	_	_	_
g562	59.82	106.77	0.83	0.122	0.395	no	up	73.08	73.53	0.01	0.879	0.988	no	up	73.08	69.58	-0.07	0.796	1	no	down	73.08	123.73	0.76	0.253	0.471	no	up	putative nonsense-mediated mRNA decay protein [Aspergillus ruber CBS 135680]	_	Nonsense-mediated mRNA decay protein (Nmd5), putative	_
g3181	2432.7	4337.22	0.83	0.122	0.395	no	up	1773.62	2401.04	0.44	0.616	0.924	no	up	1773.62	1618.24	-0.13	0.724	1	no	down	1773.62	3463.98	0.97	0.147	0.33	no	up	40S ribosomal protein S8e [Aspergillus ruber CBS 135680]	_	Ribosomal protein S8	RP-S8e, RPS8
g4194	45.73	81.38	0.83	0.124	0.399	no	up	46.34	56.15	0.28	0.798	0.975	no	up	46.34	42.5	-0.12	0.734	1	no	down	46.34	64.36	0.47	0.479	0.69	no	up	hypothetical protein EURHEDRAFT_515519 [Aspergillus ruber CBS 135680]	_	C2H2 finger domain protein, putative	REI1
g3362	59.85	106.39	0.83	0.124	0.399	no	up	36.53	50.66	0.47	0.581	0.914	no	up	36.53	44.65	0.29	0.771	1	no	up	36.53	50.96	0.48	0.473	0.685	no	up	aspartyl-tRNA synthetase [Aspergillus ruber CBS 135680]	_	Afu1g02570 (Alt. Locus), aspartyl-tRNA synthetase, cytoplasmic, (6.1.1.12)	DARS, aspS
g3317	276.16	490.57	0.83	0.124	0.399	no	up	195.83	238.15	0.28	0.792	0.975	no	up	195.83	217.13	0.15	0.939	1	no	up	195.83	740.09	1.92	0.00474	0.0252	yes	up	hypothetical protein EURHEDRAFT_414002 [Aspergillus ruber CBS 135680]	_	_	_
g2293	8.17	14.65	0.83	0.124	0.399	no	up	15.71	19.8	0.33	0.735	0.959	no	up	15.71	12.4	-0.34	0.506	0.992	no	down	15.71	21.17	0.43	0.523	0.724	no	up	conserved hypothetical protein [Aspergillus terreus NIH2624]	_	Putative uncharacterized protein	GPI7
g468	13.38	23.93	0.83	0.124	0.4	no	up	7.38	12.39	0.74	0.342	0.795	no	up	7.38	10.6	0.52	0.531	1	no	up	7.38	16.75	1.17	0.0818	0.22	no	up	putative cytochrome c oxidase assembly protein Cox11 [Aspergillus ruber CBS 135680]	_	Cytochrome c oxidase assembly protein COX11, mitochondrial	COX11
g1886	453.28	804.38	0.83	0.125	0.4	no	up	438.88	380.5	-0.21	0.631	0.93	no	down	438.88	694.26	0.66	0.39	0.961	no	up	438.88	735.32	0.74	0.263	0.481	no	up	isocitrate dehydrogenase [NAD]	_	Isocitrate dehydrogenase, NAD-dependent	IDH3
g4876	11.56	20.66	0.83	0.125	0.4	no	up	12.9	13.44	0.06	0.947	0.997	no	up	12.9	12.02	-0.1	0.764	1	no	down	12.9	25.02	0.95	0.156	0.343	no	up	pseudouridylate synthase 3 [Aspergillus ruber CBS 135680]	_	Pseudouridylate synthase 3	PUS3, DEG1
g3266	21.62	38.46	0.83	0.125	0.401	no	up	22	28.05	0.35	0.715	0.951	no	up	22	21.87	-0.01	0.873	1	no	down	22	51.01	1.21	0.0701	0.198	no	up	mRNA export factor mex67 [Aspergillus ruber CBS 135680]	_	MRNA export factor mex67	NXF, TAP, MEX67
g7760	67.58	119.91	0.83	0.125	0.402	no	up	42.18	84.92	1.01	0.173	0.607	no	up	42.18	58.59	0.47	0.568	1	no	up	42.18	98.84	1.23	0.0665	0.191	no	up	hypothetical protein EURHEDRAFT_411513 [Aspergillus ruber CBS 135680]	_	Predicted protein	yidC, spoIIIJ, OXA1
g830	21.17	37.61	0.83	0.125	0.402	no	up	24.56	31.39	0.35	0.71	0.951	no	up	24.56	32.14	0.39	0.66	1	no	up	24.56	52.77	1.1	0.0989	0.253	no	up	hypothetical protein EURHEDRAFT_408566 [Aspergillus ruber CBS 135680]	_	Putative uncharacterized protein	_
g7316	16.76	29.77	0.83	0.13	0.41	no	up	53.29	8.96	-2.56	0.000141	0.00418	yes	down	53.29	143.5	1.43	0.0459	0.335	no	up	53.29	57.45	0.11	0.881	0.947	no	up	hypothetical protein EURHEDRAFT_512698 [Aspergillus ruber CBS 135680]	_	Pc21g16840	_
g2599	5.28	9.44	0.83	0.13	0.41	no	up	5.69	6.12	0.1	1	1	no	up	5.69	6.79	0.25	0.816	1	no	up	5.69	10.14	0.82	0.219	0.429	no	up	SET domain-containing protein [Aspergillus ruber CBS 135680]	_	Putative uncharacterized protein	_
g860	6.53	11.71	0.83	0.13	0.41	no	up	5.81	8.25	0.5	0.564	0.91	no	up	5.81	8.81	0.59	0.471	0.984	no	up	5.81	13.27	1.18	0.083	0.223	no	up	hypothetical protein EURHEDRAFT_374313 [Aspergillus ruber CBS 135680]	_	_	_
g5216	4.24	7.59	0.83	0.134	0.415	no	up	1.62	4.3	1.36	0.0642	0.358	no	up	1.62	7.09	2.06	0.00397	0.0536	no	up	1.62	7.96	2.23	0.00129	0.00861	yes	up	N2227-domain-containing protein [Aspergillus ruber CBS 135680]	_	Pc16g02730	_
g6645	8.15	14.52	0.83	0.135	0.418	no	up	16.64	14.73	-0.17	0.679	0.944	no	down	16.64	12.6	-0.4	0.46	0.981	no	down	16.64	23.21	0.48	0.482	0.691	no	up	PAP2 domain protein [Aspergillus ruber CBS 135680]	_	PAP2 domain protein	DPP1
g3647	6.32	11.28	0.83	0.145	0.436	no	up	10.93	10.51	-0.06	0.822	0.978	no	down	10.93	8.98	-0.28	0.588	1	no	down	10.93	14.3	0.38	0.588	0.772	no	up	hypothetical protein EURHEDRAFT_449593 [Aspergillus ruber CBS 135680]	_	_	POP7, RPP2
g3419	206.46	364.96	0.82	0.127	0.404	no	up	192.97	234.15	0.28	0.795	0.975	no	up	192.97	165.97	-0.22	0.629	1	no	down	192.97	313.43	0.7	0.293	0.516	no	up	eukaryotic translation initiation factor 3 subunit EifCb [Aspergillus ruber CBS 135680]	_	Eukaryotic translation initiation factor 3 subunit B (eIF3b)(Eukaryotic translation initiati [...]	EIF3B
g2504	23.41	41.48	0.82	0.127	0.405	no	up	40.67	51.68	0.34	0.72	0.954	no	up	40.67	20.07	-1.02	0.0937	0.523	no	down	40.67	95.28	1.23	0.0667	0.191	no	up	hypothetical protein EURHEDRAFT_451933 [Aspergillus ruber CBS 135680]	_	Putative uncharacterized protein	_
g356	21.28	37.66	0.82	0.128	0.405	no	up	14.8	24.43	0.72	0.354	0.803	no	up	14.8	17.77	0.26	0.806	1	no	up	14.8	43.92	1.56	0.0202	0.08	no	up	hypothetical protein EURHEDRAFT_477725 [Aspergillus ruber CBS 135680]	_	Afu2g13540 (Alt. Locus), CCCH zinc finger and RRM domain protein	_
g221	45.89	81.11	0.82	0.128	0.406	no	up	70.38	62.7	-0.17	0.675	0.943	no	down	70.38	98.93	0.49	0.55	1	no	up	70.38	109.26	0.63	0.341	0.564	no	up	transcriptional adaptor 2 [Aspergillus ruber CBS 135680]	_	Contig An02c0170, complete genome	TADA2A, ADA2
g5274	189.58	333.99	0.82	0.128	0.407	no	up	119.05	251.72	1.08	0.141	0.544	no	up	119.05	188.5	0.66	0.39	0.961	no	up	119.05	291.78	1.29	0.0531	0.163	no	up	homocitrate synthase [Aspergillus ruber CBS 135680]	_	Catalytic activity: homocitrate synthases convert 2-hydroxybutane-1 (EC 2.3.3.14)	LYS21, LYS20
g4060	7.02	12.44	0.82	0.129	0.408	no	up	9.62	13.35	0.47	0.583	0.914	no	up	9.62	11.29	0.23	0.843	1	no	up	9.62	17.13	0.83	0.213	0.422	no	up	P-loop containing nucleoside triphosphate hydrolase protein [Aspergillus ruber CBS 135680]	_	ATP-dependent RNA helicase A	_
g1068	56.74	100.14	0.82	0.129	0.408	no	up	34.17	64.23	0.91	0.226	0.682	no	up	34.17	48.69	0.51	0.534	1	no	up	34.17	80.51	1.23	0.0655	0.189	no	up	Rho GTPase Rho3 [Aspergillus ruber CBS 135680]	_	GTPase Rho2Rho GTPase Rho3 ;	K07975
g5769	93.19	164.08	0.82	0.129	0.408	no	up	96.24	107.8	0.16	0.934	0.996	no	up	96.24	75.18	-0.36	0.488	0.988	no	down	96.24	143.06	0.57	0.391	0.611	no	up	translation initiation factor 4B [Aspergillus ruber CBS 135680]	_	translation initiation factor 4B (AFU_orthologue; AFUA_2G16400)	EIF4B
g6175	34.77	61.31	0.82	0.129	0.408	no	up	37.89	39.88	0.07	0.958	0.999	no	up	37.89	44.82	0.24	0.827	1	no	up	37.89	88.62	1.22	0.0669	0.192	no	up	hypothetical protein EURHEDRAFT_206907 [Aspergillus ruber CBS 135680]	_	Dynein light intermediate chain	DYNC1LI, DNCLI
g7000	29.94	53.03	0.82	0.131	0.411	no	up	33.68	46.95	0.48	0.579	0.913	no	up	33.68	69.59	1.04	0.156	0.682	no	up	33.68	70.74	1.07	0.112	0.274	no	up	integral membrane protein [Aspergillus ruber CBS 135680]	_	Integral membrane protein, putative	_
g3602	12.91	22.91	0.82	0.132	0.413	no	up	13.67	15.53	0.18	0.914	0.992	no	up	13.67	19.85	0.53	0.51	0.993	no	up	13.67	30.17	1.14	0.0927	0.242	no	up	MOZ/SAS-like protein [Aspergillus ruber CBS 135680]	_	Histone acetyltransferase (MysT1), putative	_
g6628	0.93	1.72	0.82	0.195	0.503	no	up	0.8	0.98	0.26	0.914	0.992	no	up	0.8	2.6	1.58	0.0497	0.354	no	up	0.8	2.62	1.6	0.0353	0.121	no	up	hypothetical protein EURHEDRAFT_485611 [Aspergillus ruber CBS 135680]	_	Predicted protein	_
g8351	1.54	2.79	0.82	0.203	0.514	no	up	3.24	1.7	-0.89	0.196	0.641	no	down	3.24	0.88	-1.77	0.016	0.159	no	down	3.24	2.14	-0.58	0.45	0.665	no	down	conserved hypothetical protein [Aspergillus clavatus NRRL 1]	_	Afu3g13780 (Alt. Locus), conserved hypothetical protein	_
g1198	2272.74	3997.85	0.81	0.129	0.408	no	up	1468.23	2249.72	0.62	0.439	0.853	no	up	1468.23	1325.87	-0.15	0.707	1	no	down	1468.23	2997.36	1.03	0.122	0.29	no	up	putative 60S ribosomal protein L27a [Aspergillus ruber CBS 135680]	_	60S ribosomal protein L27a, putative	RP-L27Ae, RPL27A
g4910	27.81	48.99	0.81	0.129	0.408	no	up	27.97	37.17	0.41	0.647	0.935	no	up	27.97	44.96	0.68	0.373	0.95	no	up	27.97	90.52	1.69	0.0121	0.0536	no	up	hypothetical protein EURHEDRAFT_516212 [Aspergillus ruber CBS 135680]	_	Contig An02c0270, complete genome	_
g3889	38.24	67.33	0.81	0.13	0.41	no	up	57.51	35.96	-0.68	0.233	0.691	no	down	57.51	40.62	-0.5	0.362	0.94	no	down	57.51	54.35	-0.08	0.891	0.953	no	down	integral membrane protein [Aspergillus ruber CBS 135680]	_	Integral membrane protein	_
g5763	14.35	25.31	0.81	0.131	0.411	no	up	9.04	21.63	1.25	0.0858	0.419	no	up	9.04	14.49	0.67	0.382	0.958	no	up	9.04	17.3	0.93	0.164	0.357	no	up	hypothetical protein EURHEDRAFT_411057 [Aspergillus ruber CBS 135680]	_	Putative uncharacterized protein	_
g2897	111.27	195.28	0.81	0.131	0.411	no	up	108.34	113.04	0.06	0.943	0.997	no	up	108.34	135.36	0.32	0.734	1	no	up	108.34	203.21	0.91	0.173	0.37	no	up	adenylate kinase 1 [Aspergillus ruber CBS 135680]	_	Adenylate kinase 1 (AK 1)(EC 2.7.4.3)(ATP-AMP transphosphorylase 1)(Adenylate kinase cytosol [...]	adk, AK
g5016	42.24	74.06	0.81	0.132	0.413	no	up	31.1	38.84	0.32	0.749	0.964	no	up	31.1	33.72	0.12	0.98	1	no	up	31.1	66.35	1.09	0.102	0.26	no	up	putative homoserine O-acetyltransferase [Aspergillus ruber CBS 135680]	_	Homoserine O-acetyltransferase, putative	metX
g1720	836.46	1463.64	0.81	0.132	0.413	no	up	610.55	757.95	0.31	0.756	0.965	no	up	610.55	593.68	-0.04	0.832	1	no	down	610.55	1184.71	0.96	0.151	0.335	no	up	putative NAD-dependent D-isomer specific 2-hydroxyacid dehydrogenase [Aspergillus ruber CBS 135680]	_	Hydroxyisocaproate dehydrogenase, putative	serA, PHGDH
g4901	11.08	19.49	0.81	0.132	0.413	no	up	19.05	15.78	-0.27	0.564	0.91	no	down	19.05	15.97	-0.25	0.593	1	no	down	19.05	26.67	0.48	0.469	0.682	no	up	hypothetical protein EURHEDRAFT_413542 [Aspergillus ruber CBS 135680]	_	Putative uncharacterized protein	_
g5332	8.52	15.03	0.81	0.133	0.414	no	up	5.17	8.59	0.72	0.353	0.802	no	up	5.17	8.69	0.74	0.33	0.921	no	up	5.17	19.1	1.87	0.00608	0.0307	yes	up	hypothetical protein EURHEDRAFT_512070 [Aspergillus ruber CBS 135680]	_	_	_
g7514	25.07	43.88	0.81	0.133	0.414	no	up	20.91	73.02	1.8	0.0117	0.116	no	up	20.91	32.93	0.65	0.398	0.961	no	up	20.91	85.29	2.02	0.00295	0.017	yes	up	hypothetical protein EURHEDRAFT_430203, partial [Aspergillus ruber CBS 135680]	_	Afu2g15000 (Alt. Locus), Mechanosensitive ion channel family	_
g2758	13.99	24.54	0.81	0.133	0.414	no	up	4.16	12.29	1.54	0.0316	0.232	no	up	4.16	11.48	1.44	0.0432	0.32	no	up	4.16	25.02	2.56	0.000225	0.00193	yes	up	initiation factor 2 [Aspergillus ruber CBS 135680]	_	Mitochondrial translation initiation factor, putative	infB, MTIF2
g6931	22.26	38.99	0.81	0.133	0.414	no	up	16.16	29.66	0.87	0.247	0.707	no	up	16.16	29.29	0.85	0.251	0.851	no	up	16.16	53.45	1.72	0.0109	0.0496	yes	up	putative ABC transporter [Aspergillus ruber CBS 135680]	_	ABC transporter, putative	_
g3606	41.98	73.82	0.81	0.133	0.414	no	up	28.3	49.04	0.79	0.304	0.765	no	up	28.3	47.78	0.75	0.323	0.919	no	up	28.3	72.44	1.35	0.0452	0.145	no	up	cytochrome oxidase biogenesis protein, Cox20 subunit [Aspergillus ruber CBS 135680]	_	Putative uncharacterized protein	COX20
g5963	12.04	21.19	0.81	0.134	0.415	no	up	7.64	14.48	0.91	0.225	0.682	no	up	7.64	16.39	1.09	0.136	0.646	no	up	7.64	34.23	2.15	0.00176	0.0111	yes	up	A subunit of putative glutamyl-tRNA amidotransferase [Aspergillus ruber CBS 135680]	_	Contig An01c0020, complete genome	gatA, QRSL1
g7089	16.84	29.59	0.81	0.134	0.416	no	up	11.55	26.92	1.21	0.0983	0.452	no	up	11.55	13.51	0.22	0.854	1	no	up	11.55	15.78	0.45	0.511	0.714	no	up	phosphotransferase 1 [Aspergillus ruber CBS 135680]	_	Afu2g02890 (Alt. Locus), tRNA splicing 2' phosphotransferase 1	_
g5951	10.53	18.53	0.81	0.136	0.419	no	up	10.31	10.95	0.09	0.982	1	no	up	10.31	17.66	0.77	0.311	0.91	no	up	10.31	20.08	0.95	0.155	0.341	no	up	Epa5p [Candida glabrata]	_	_	_
g1026	5.76	10.16	0.81	0.137	0.421	no	up	4.8	10.42	1.1	0.138	0.537	no	up	4.8	10.35	1.09	0.138	0.649	no	up	4.8	25.23	2.37	0.000646	0.00479	yes	up	GPI2-domain-containing protein [Aspergillus ruber CBS 135680]	_	Putative uncharacterized protein	PIGC, GPI2
g3379	13.63	23.89	0.81	0.139	0.423	no	up	9.45	18.21	0.94	0.215	0.666	no	up	9.45	18.8	0.98	0.187	0.746	no	up	9.45	31.67	1.73	0.0111	0.0503	no	up	putative alpha/beta fold family hydrolase [Aspergillus ruber CBS 135680]	_	Alpha/beta fold family hydrolase, putative	_
g5204	4.02	7.1	0.81	0.139	0.424	no	up	7.33	8.15	0.15	0.95	0.997	no	up	7.33	2.34	-1.61	0.0117	0.124	no	down	7.33	1.41	-2.3	0.00085	0.00606	yes	down	putative dextranase protein [Eutypa lata UCREL1]	_	_	_
g825	19.92	34.96	0.81	0.139	0.424	no	up	18.22	24.31	0.41	0.652	0.935	no	up	18.22	17.36	-0.07	0.81	1	no	down	18.22	43.3	1.24	0.0682	0.195	no	up	benzodiazepine receptor family protein [Aspergillus ruber CBS 135680]	_	Putative uncharacterized protein	BZRP
g4814	4.49	7.95	0.81	0.151	0.444	no	up	94.1	8.51	-3.45	1.03e-06	8.42e-05	yes	down	94.1	2.28	-5.31	1.54e-11	4.06e-09	yes	down	94.1	1.57	-5.82	1.47e-12	7.67e-11	yes	down	hypothetical protein EURHEDRAFT_415606 [Aspergillus ruber CBS 135680]	_	_	_
g1638	5.65	9.99	0.81	0.195	0.503	no	up	5.91	8.27	0.48	0.651	0.935	no	up	5.91	12.48	1.07	0.207	0.78	no	up	5.91	20.05	1.75	0.0165	0.0687	no	up	nucleoplasmin [Aspergillus oryzae RIB40]	_	_	_
g1738	53.58	93.65	0.8	0.133	0.414	no	up	30.96	57.43	0.89	0.235	0.691	no	up	30.96	33.6	0.12	0.977	1	no	up	30.96	82.93	1.42	0.0342	0.119	no	up	putative methyltransferase [Aspergillus ruber CBS 135680]	_	Methyltransferase (Ncl1), putative	NCL1, TRM4
g4707	11.85	20.69	0.8	0.135	0.417	no	up	18.1	13.6	-0.41	0.429	0.848	no	down	18.1	20.33	0.17	0.917	1	no	up	18.1	41.09	1.18	0.0769	0.211	no	up	hypothetical protein EURHEDRAFT_465588 [Aspergillus ruber CBS 135680]	_	GTPase activating protein (BUD2/CLA2), putative	_
g4731	398.71	694.23	0.8	0.135	0.418	no	up	216.71	347.27	0.68	0.385	0.825	no	up	216.71	147.55	-0.55	0.321	0.918	no	down	216.71	580.48	1.42	0.0341	0.118	no	up	hypothetical protein EURHEDRAFT_416852 [Aspergillus ruber CBS 135680]	_	Putative uncharacterized protein	_
g7011	323.51	563.01	0.8	0.135	0.418	no	up	215.33	687.84	1.68	0.0192	0.165	no	up	215.33	299.44	0.48	0.565	1	no	up	215.33	343.71	0.67	0.311	0.534	no	up	stearoyl-CoA desaturase [Aspergillus ruber CBS 135680]	_	Stearoyl-CoA desaturase	SCD, desC
g5587	55.53	96.65	0.8	0.136	0.419	no	up	96.56	65.79	-0.55	0.314	0.774	no	down	96.56	112.08	0.21	0.859	1	no	up	96.56	153.42	0.67	0.316	0.539	no	up	R3H domain protein [Aspergillus ruber CBS 135680]	_	Predicted protein	_
g3490	128.33	223.19	0.8	0.136	0.419	no	up	70.38	86.52	0.3	0.774	0.97	no	up	70.38	63.86	-0.14	0.716	1	no	down	70.38	189.04	1.42	0.0336	0.117	no	up	putative hydroxymethylglutaryl-CoA synthase [Aspergillus ruber CBS 135680]	_	Hydroxymethylglutaryl-CoA synthase, putative	E2.3.3.10
g473	82.12	143.14	0.8	0.136	0.419	no	up	66.08	87.85	0.41	0.649	0.935	no	up	66.08	71.53	0.11	0.983	1	no	up	66.08	123.41	0.9	0.178	0.377	no	up	putative mitochondrial large ribosomal subunit protein L16 [Aspergillus ruber CBS 135680]	_	Mitochondrial large ribosomal subunit protein L16, putative	_
g465	13.23	23.15	0.8	0.136	0.419	no	up	13.67	13.73	0.01	0.883	0.988	no	up	13.67	18.17	0.41	0.642	1	no	up	13.67	32.74	1.25	0.0615	0.181	no	up	hypothetical protein EURHEDRAFT_375533 [Aspergillus ruber CBS 135680]	_	Kinetochore protein fta7, putative	FTA7, CNL3
g1876	579.64	1006.62	0.8	0.136	0.42	no	up	344.29	541.98	0.65	0.405	0.834	no	up	344.29	391.8	0.19	0.893	1	no	up	344.29	825.99	1.26	0.0588	0.175	no	up	60S ribosomal protein [Aspergillus ruber CBS 135680]	_	60S ribosomal protein L5, putative	RP-L5e, RPL5
g4425	83.6	145.34	0.8	0.136	0.42	no	up	64.81	77.88	0.26	0.812	0.977	no	up	64.81	62.75	-0.05	0.826	1	no	down	64.81	120.63	0.9	0.179	0.378	no	up	50S ribosomal protein L2 [Aspergillus ruber CBS 135680]	_	50S ribosomal protein L2	_
g4802	65.55	113.99	0.8	0.137	0.42	no	up	125.65	70.61	-0.83	0.155	0.571	no	down	125.65	103.71	-0.28	0.567	1	no	down	125.65	144.9	0.21	0.764	0.884	no	up	carbon-nitrogen hydrolase [Aspergillus ruber CBS 135680]	_	Catalytic activity: a Nitrile + H2O = a Carboxylate + NH3. Precursor (EC 3.5.5.1)	_
g3826	37.22	64.9	0.8	0.137	0.42	no	up	40.34	63.17	0.65	0.416	0.84	no	up	40.34	46.14	0.19	0.887	1	no	up	40.34	56.32	0.48	0.475	0.687	no	up	ribosome recycling factor, partial [Aspergillus ruber CBS 135680]	_	Hsp70 chaperone (HscA), putative	HSPA1_8
g2587	61.59	107.05	0.8	0.137	0.421	no	up	73.6	99.94	0.44	0.613	0.923	no	up	73.6	103.76	0.49	0.546	1	no	up	73.6	69.81	-0.08	0.898	0.956	no	down	folylpolyglutamate synthase [Aspergillus ruber CBS 135680]	_	Afu6g09440 (Alt. Locus), tetrahydrofolylpolyglutamate synthase, putative, (6.3.2.17)	FPGS
g245	57.1	99.17	0.8	0.138	0.422	no	up	96.06	87.48	-0.13	0.71	0.951	no	down	96.06	54.29	-0.82	0.163	0.697	no	down	96.06	127.41	0.41	0.544	0.739	no	up	golgi membrane protein [Aspergillus ruber CBS 135680]	_	Golgi	_
g3393	8.52	14.87	0.8	0.138	0.422	no	up	6.09	10.36	0.76	0.322	0.782	no	up	6.09	7.49	0.29	0.766	1	no	up	6.09	23.34	1.92	0.00467	0.0249	yes	up	putative ARS binding protein Abp2 [Aspergillus ruber CBS 135680]	_	ARS binding protein Abp2, putative (AFU_orthologue; AFUA_1G02270)	_
g3376	21.42	37.25	0.8	0.139	0.423	no	up	22.24	24.34	0.13	0.975	1	no	up	22.24	35.12	0.66	0.398	0.961	no	up	22.24	45.6	1.03	0.123	0.291	no	up	hypothetical protein EURHEDRAFT_414084 [Aspergillus ruber CBS 135680]	_	Putative uncharacterized protein	CD2BP2, PPP1R59
g4683	15.2	26.48	0.8	0.139	0.424	no	up	9.48	15.5	0.7	0.37	0.813	no	up	9.48	18.2	0.93	0.211	0.786	no	up	9.48	25.79	1.43	0.034	0.118	no	up	putative OTU-like cysteine protease [Aspergillus ruber CBS 135680]	_	Afu4g13560 (Alt. Locus), OTU-like cysteine protease, putative	OTUD6
g4065	14.39	25.17	0.8	0.14	0.426	no	up	8.9	30.36	1.76	0.0152	0.14	no	up	8.9	6.69	-0.41	0.468	0.981	no	down	8.9	53.04	2.56	0.000258	0.00217	yes	up	hypothetical protein EURHEDRAFT_514432 [Aspergillus ruber CBS 135680]	_	_	_
g6516	25.71	44.73	0.8	0.14	0.427	no	up	15.02	29.1	0.95	0.208	0.659	no	up	15.02	28.28	0.91	0.225	0.814	no	up	15.02	55.74	1.88	0.00586	0.0298	yes	up	cytochrome c1 heme lyase [Aspergillus ruber CBS 135680]	_	Afu4g07120 (Alt. Locus), cytochrome c1 heme lyase	E4.4.1.17
g7273	17.3	30.27	0.8	0.157	0.451	no	up	8.19	12.03	0.55	0.577	0.913	no	up	8.19	13.79	0.74	0.416	0.969	no	up	8.19	25.76	1.64	0.0234	0.0896	no	up	RNA polymerase II transcription factor B subunit 5 [Aspergillus ruber CBS 135680]	_	DNA repair protein Rex1, putative	TTDA, GTF2H5, TFB5
g7963	4.71	8.29	0.8	0.195	0.504	no	up	12.54	12.61	0.01	0.904	0.989	no	up	12.54	19.97	0.67	0.411	0.967	no	up	12.54	12.55	0	1	1	no	up	MGMT family protein [Aspergillus ruber CBS 135680]	_	MGMT family protein	ybaZ
g4446	95.96	166.29	0.79	0.138	0.422	no	up	92.01	115.58	0.33	0.737	0.959	no	up	92.01	122.73	0.42	0.628	1	no	up	92.01	193.77	1.07	0.107	0.266	no	up	putative N-terminal acetyltransferase catalytic subunit Nat1 [Aspergillus ruber CBS 135680]	_	Putative uncharacterized protein	E2.3.1.88
g2449	175.72	304.2	0.79	0.138	0.423	no	up	233.76	199.21	-0.23	0.604	0.918	no	down	233.76	204.42	-0.19	0.656	1	no	down	233.76	280.22	0.26	0.699	0.843	no	up	putative eukaryotic translation initiation factor 5 [Aspergillus ruber CBS 135680]	_	Function: eukaryotic translation initiation factor 5	EIF5
g5780	19.43	33.73	0.79	0.139	0.424	no	up	27.02	26.72	-0.02	0.849	0.982	no	down	27.02	27.81	0.04	0.934	1	no	up	27.02	37.92	0.49	0.467	0.68	no	up	glutamyl-tRNA synthetase [Aspergillus ruber CBS 135680]	_	Contig An15c0220, complete genome. (EC 6.1.1.17)	EARS, gltX
g7131	17.19	29.87	0.79	0.139	0.425	no	up	16.12	26.32	0.7	0.366	0.811	no	up	16.12	25.86	0.68	0.377	0.953	no	up	16.12	41.55	1.36	0.0428	0.139	no	up	hypothetical protein EURHEDRAFT_513085 [Aspergillus ruber CBS 135680]	_	Putative uncharacterized protein	_
g6735	16.66	28.96	0.79	0.141	0.428	no	up	12.44	21.03	0.75	0.33	0.787	no	up	12.44	12.57	0.01	0.909	1	no	up	12.44	27.03	1.11	0.0973	0.25	no	up	Bud-site selection protein [Aspergillus ruber CBS 135680]	_	_	_
g1775	18.7	32.36	0.79	0.141	0.428	no	up	13.4	18.32	0.45	0.605	0.918	no	up	13.4	20.84	0.63	0.418	0.969	no	up	13.4	26.87	1	0.135	0.312	no	up	P-loop containing nucleoside triphosphate hydrolase protein [Aspergillus ruber CBS 135680]	_	GTP-binding protein	K06942
g7850	102.16	176.77	0.79	0.141	0.428	no	up	75.76	130.2	0.78	0.311	0.772	no	up	75.76	97.12	0.36	0.695	1	no	up	75.76	126	0.73	0.275	0.494	no	up	putative small nuclear ribonucleo protein SmD2 [Aspergillus ruber CBS 135680]	_	Small nuclear ribonucleoprotein Sm D2	SNRPD2, SMD2
g1964	19.63	34.06	0.79	0.142	0.429	no	up	12.45	25.28	1.02	0.174	0.609	no	up	12.45	19.58	0.65	0.411	0.967	no	up	12.45	38.36	1.62	0.0176	0.0724	no	up	hypothetical protein EURHEDRAFT_412287 [Aspergillus ruber CBS 135680]	_	Possible translation initiation factorTranslation initiation factor 3, putative ;	infC, MTIF3
g3830	36.04	62.35	0.79	0.143	0.433	no	up	49.31	52.81	0.1	0.994	1	no	up	49.31	75.02	0.6	0.443	0.975	no	up	49.31	76.6	0.63	0.346	0.568	no	up	hypothetical protein EURHEDRAFT_454441 [Aspergillus ruber CBS 135680]	_	Cytoplasmic protein required for cell viability, putative	_
g7892	12.11	20.94	0.79	0.145	0.436	no	up	7.76	16.79	1.1	0.135	0.528	no	up	7.76	10.94	0.49	0.561	1	no	up	7.76	18.89	1.27	0.0587	0.175	no	up	pseudouridine synthase [Aspergillus ruber CBS 135680]	_	Pseudouridine synthase	truB, PUS4, TRUB1
g934	5.2	9.04	0.79	0.147	0.439	no	up	2.73	5.22	0.91	0.236	0.692	no	up	2.73	11.48	2.03	0.00483	0.063	no	up	2.73	8.38	1.58	0.0209	0.0822	no	up	MFS general substrate transporter [Aspergillus ruber CBS 135680]	_	Contig An16c0070, complete genome	_
g6416	8.41	14.65	0.79	0.15	0.443	no	up	14.72	9.56	-0.62	0.285	0.748	no	down	14.72	21.09	0.52	0.532	1	no	up	14.72	19.46	0.4	0.554	0.747	no	up	hypothetical protein EURHEDRAFT_413036 [Aspergillus ruber CBS 135680]	_	Hsp40 co-chaperone Jid1, putative	_
g8044	2.08	3.68	0.79	0.161	0.458	no	up	1.14	3.83	1.66	0.0294	0.22	no	up	1.14	3.84	1.67	0.0258	0.227	no	up	1.14	8.34	2.77	0.000137	0.00125	yes	up	sterol desaturase [Aspergillus ruber CBS 135680]	_	C-4 methylsterol oxidase, putative (EC 1.-.-.-)	E1.14.13.72, SC4MOL, ERG25
g6670	5.96	10.4	0.79	0.171	0.472	no	up	6.2	8.45	0.44	0.647	0.935	no	up	6.2	13.41	1.1	0.147	0.667	no	up	6.2	13.66	1.13	0.11	0.271	no	up	alpha/beta-hydrolase [Aspergillus ruber CBS 135680]	_	_	_
g2589	2.44	4.3	0.79	0.195	0.504	no	up	2.02	3.27	0.67	0.466	0.865	no	up	2.02	1.48	-0.42	0.542	1	no	down	2.02	0.28	-2.48	0.00576	0.0294	yes	down	hypothetical protein ASPNIDRAFT_36122 [Aspergillus niger ATCC 1015]	_	_	_
g7143	2.68	4.71	0.79	0.2	0.51	no	up	1.51	4.44	1.5	0.0781	0.399	no	up	1.51	3.53	1.17	0.195	0.762	no	up	1.51	1.77	0.22	0.833	0.924	no	up	Protein of unknown function DUF3435 [Penicillium roqueforti FM164]	_	_	_
g5511	56.73	97.77	0.78	0.142	0.429	no	up	38.84	50.7	0.38	0.676	0.943	no	up	38.84	44.02	0.18	0.902	1	no	up	38.84	100.88	1.37	0.0403	0.133	no	up	RCC1/BLIP-II protein [Aspergillus ruber CBS 135680]	_	Ran exchange factor Prp20/Pim1, putative	RCC1
g1466	17.61	30.38	0.78	0.143	0.431	no	up	12.44	22.06	0.82	0.279	0.74	no	up	12.44	21.6	0.79	0.293	0.898	no	up	12.44	31.28	1.32	0.0487	0.153	no	up	hypothetical protein EURHEDRAFT_70337 [Aspergillus ruber CBS 135680]	_	Contig An04c0100, complete genome	_
g6512	31.49	54.07	0.78	0.144	0.433	no	up	27.7	41.63	0.59	0.466	0.865	no	up	27.7	28.49	0.04	0.931	1	no	up	27.7	45.83	0.72	0.276	0.496	no	up	putative ATP dependent RNA helicase [Aspergillus ruber CBS 135680]	_	ATP dependent RNA helicase (Dob1), putative	MTR4, SKIV2L2
g3869	83.26	142.98	0.78	0.144	0.434	no	up	22.37	19.87	-0.17	0.679	0.944	no	down	22.37	18.29	-0.29	0.557	1	no	down	22.37	121.16	2.43	0.00045	0.00352	yes	up	hypothetical protein EURHEDRAFT_530408 [Aspergillus ruber CBS 135680]	_	_	_
g5908	64.43	110.53	0.78	0.144	0.435	no	up	64.37	50.93	-0.34	0.497	0.882	no	down	64.37	51.95	-0.31	0.536	1	no	down	64.37	95.03	0.56	0.4	0.619	no	up	aminomethyltransferase mitochondrial precursor [Aspergillus ruber CBS 135680]	_	Aminomethyltransferase, mitochondrial ; The glycine cleavage system catalyzes the degradatio [...]	gcvT, AMT
g5342	152.97	262.18	0.78	0.144	0.435	no	up	81.89	134.4	0.71	0.357	0.806	no	up	81.89	106.84	0.38	0.665	1	no	up	81.89	222.58	1.44	0.0318	0.112	no	up	ClpS-like protein [Aspergillus ruber CBS 135680]	_	Putative uncharacterized protein	RP-L7, MRPL12, rplL
g543	75.77	130.12	0.78	0.145	0.436	no	up	94.43	102.81	0.12	0.985	1	no	up	94.43	91.48	-0.05	0.827	1	no	down	94.43	148.7	0.65	0.327	0.55	no	up	hypothetical protein EURHEDRAFT_499426 [Aspergillus ruber CBS 135680]	_	Putative uncharacterized protein	_
g59	13.9	23.94	0.78	0.145	0.436	no	up	13.21	21.02	0.67	0.397	0.829	no	up	13.21	20.06	0.6	0.447	0.975	no	up	13.21	34.54	1.38	0.0395	0.131	no	up	hypothetical protein EURHEDRAFT_463891 [Aspergillus ruber CBS 135680]	_	_	MTEF1
g897	89.5	153.23	0.78	0.146	0.437	no	up	55.7	104.92	0.91	0.223	0.679	no	up	55.7	66.33	0.25	0.816	1	no	up	55.7	136.32	1.29	0.0541	0.165	no	up	ribosome biogenesis protein Nsa2 [Aspergillus ruber CBS 135680]	_	Pc20g06500	NSA2
g558	18.91	32.45	0.78	0.146	0.438	no	up	15.82	19.23	0.28	0.796	0.975	no	up	15.82	26.96	0.77	0.311	0.91	no	up	15.82	72.3	2.19	0.00144	0.00937	yes	up	hypothetical protein EURHEDRAFT_411939 [Aspergillus ruber CBS 135680]	_	Putative uncharacterized protein	_
g1366	23.4	40.16	0.78	0.146	0.438	no	up	13.97	32.04	1.19	0.103	0.463	no	up	13.97	11.34	-0.3	0.554	1	no	down	13.97	34.89	1.31	0.0504	0.157	no	up	putative microtubule associated protein [Aspergillus ruber CBS 135680]	_	Ribosome biogenesis protein ytm1 ; Component of the NOP7 complex, which is required for matu [...]	YTM1, WDR12
g4416	27.56	47.32	0.78	0.146	0.438	no	up	25.76	35.21	0.45	0.606	0.918	no	up	25.76	25.32	-0.02	0.852	1	no	down	25.76	51.54	1	0.136	0.313	no	up	methyltransferase-like protein 1 [Aspergillus ruber CBS 135680]	_	methyltransferase-like protein 1 (AFU_orthologue; AFUA_4G12280)	trmB, METTL1
g8095	1.65	2.9	0.78	0.147	0.439	no	up	2.11	2.28	0.11	1	1	no	up	2.11	1.26	-0.7	0.224	0.81	no	down	2.11	2.06	-0.03	0.963	0.987	no	down	putative fumarylacetoacetate hydrolase [Aspergillus ruber CBS 135680]	_	Fumarylacetoacetate hydrolase, putative	_
g6083	4.72	8.16	0.78	0.147	0.439	no	up	3.35	3.51	0.07	0.963	0.999	no	up	3.35	8.41	1.3	0.0715	0.446	no	up	3.35	8.36	1.29	0.0554	0.168	no	up	MFS general substrate transporter [Aspergillus ruber CBS 135680]	_	Putative uncharacterized protein	_
g7118	4.19	7.26	0.78	0.147	0.439	no	up	4.96	7.39	0.57	0.486	0.875	no	up	4.96	8.68	0.8	0.291	0.895	no	up	4.96	9.24	0.88	0.183	0.383	no	up	hypothetical protein EURHEDRAFT_409343 [Aspergillus ruber CBS 135680]	_	_	_
g2231	13.28	22.85	0.78	0.148	0.441	no	up	15.81	16.8	0.09	0.982	1	no	up	15.81	15.87	0.01	0.897	1	no	up	15.81	32.71	1.04	0.121	0.288	no	up	histone H3 variant [Aspergillus ruber CBS 135680]	_	Histone H3	CENPA
g3236	7.51	12.98	0.78	0.157	0.451	no	up	10.39	10.19	-0.03	0.854	0.982	no	down	10.39	9.78	-0.09	0.789	1	no	down	10.39	13.16	0.34	0.634	0.802	no	up	hypothetical protein EURHEDRAFT_387129 [Aspergillus ruber CBS 135680]	_	_	_
g7014	3.34	5.81	0.78	0.16	0.456	no	up	4.79	9.32	0.95	0.213	0.665	no	up	4.79	6.16	0.36	0.709	1	no	up	4.79	10.05	1.05	0.122	0.29	no	up	P-loop containing nucleoside triphosphate hydrolase protein [Aspergillus ruber CBS 135680]	_	Predicted protein	_
g997	1.98	3.48	0.78	0.169	0.468	no	up	12.35	6.72	-0.87	0.147	0.556	no	down	12.35	9.55	-0.37	0.489	0.988	no	down	12.35	6.87	-0.84	0.209	0.417	no	down	hypothetical protein EURHEDRAFT_360505 [Aspergillus ruber CBS 135680]	_	_	_
g1102	2.15	3.77	0.78	0.226	0.551	no	up	5.52	4.76	-0.21	0.689	0.946	no	down	5.52	4.31	-0.35	0.562	1	no	down	5.52	1.51	-1.8	0.0221	0.0858	no	down	Pc12g12050 [Penicillium rubens Wisconsin 54-1255]	_	_	_
g1516	0.85	1.53	0.78	0.315	0.65	no	up	1.47	2.77	0.87	0.355	0.804	no	up	1.47	1.08	-0.41	0.545	1	no	down	1.47	1.71	0.21	0.841	0.928	no	up	hypothetical protein EURHEDRAFT_380654 [Aspergillus ruber CBS 135680]	_	_	_
g7335	107.4	183.81	0.77	0.146	0.438	no	up	62.25	89.43	0.52	0.532	0.897	no	up	62.25	73.41	0.24	0.834	1	no	up	62.25	147.65	1.24	0.0632	0.184	no	up	putative mitochondrial ribosomal protein [Aspergillus ruber CBS 135680]	_	Predicted protein	_
g8127	58.5	99.91	0.77	0.146	0.438	no	up	57.11	75.22	0.4	0.66	0.938	no	up	57.11	103.05	0.85	0.252	0.851	no	up	57.11	181.09	1.66	0.0135	0.0584	no	up	sulfite reductase beta subunit [Aspergillus ruber CBS 135680]	_	Sulfite reductase	cysI
g6602	39.81	68.14	0.77	0.146	0.438	no	up	29	65.94	1.18	0.105	0.467	no	up	29	41.03	0.5	0.543	1	no	up	29	61.35	1.08	0.107	0.266	no	up	Low temperature viability protein [Aspergillus ruber CBS 135680]	_	Low-temperature viability protein ltv1	LTV1
g3149	10.62	18.19	0.77	0.147	0.438	no	up	5.74	10.27	0.83	0.271	0.731	no	up	5.74	9.64	0.74	0.328	0.921	no	up	5.74	21.53	1.89	0.00521	0.0271	yes	up	putative translation regulator [Aspergillus ruber CBS 135680]	_	Translation regulator (Cya5), putative	PET309
g720	74.34	126.99	0.77	0.147	0.439	no	up	38.2	68.72	0.85	0.264	0.723	no	up	38.2	65.93	0.79	0.297	0.904	no	up	38.2	118.86	1.64	0.0153	0.0646	no	up	37S ribosomal protein S5 [Aspergillus ruber CBS 135680]	_	Putative uncharacterized protein	RP-S5, MRPS5, rpsE
g4265	119.08	203.12	0.77	0.147	0.439	no	up	286	184.35	-0.63	0.259	0.718	no	down	286	218.67	-0.39	0.458	0.981	no	down	286	224.01	-0.35	0.581	0.767	no	down	hypothetical protein EURHEDRAFT_515456 [Aspergillus ruber CBS 135680]	_	Function: Haa1 of S. cerevisiae regulates the transcription of a set of yeast genes	_
g7793	21.07	36.09	0.77	0.147	0.44	no	up	12.82	30.09	1.22	0.0934	0.44	no	up	12.82	13.77	0.1	0.995	1	no	up	12.82	29.06	1.17	0.0799	0.217	no	up	putative proteasome maturation ans ribosome synthesis protein Nop10 [Aspergillus ruber CBS 135680]	_	Proteasome maturation ans ribosome synthesis protein Nop10, putative	NOB1
g8300	81.39	138.88	0.77	0.147	0.44	no	up	45.03	44.27	-0.02	0.841	0.982	no	down	45.03	123.51	1.45	0.0419	0.314	no	up	45.03	119.88	1.41	0.0356	0.121	no	up	hypothetical protein ANI_1_570144 [Aspergillus niger CBS 513.88]	_	_	_
g2209	14.96	25.64	0.77	0.148	0.44	no	up	16.78	19.18	0.19	0.899	0.988	no	up	16.78	21.69	0.37	0.684	1	no	up	16.78	38.36	1.19	0.0762	0.21	no	up	transcription factor IIIB, Bdp1 subunit [Aspergillus ruber CBS 135680]	_	Complex: Tfc5p	BDP1, TFC5
g7647	57.98	98.86	0.77	0.148	0.441	no	up	47.05	92.49	0.97	0.19	0.632	no	up	47.05	36.57	-0.36	0.483	0.988	no	down	47.05	86.62	0.88	0.187	0.388	no	up	hypothetical protein EURHEDRAFT_508969 [Aspergillus ruber CBS 135680]	_	GTP-binding protein	NUG1, GNL3
g6678	76.14	130.01	0.77	0.148	0.441	no	up	246.62	467.8	0.92	0.216	0.667	no	up	246.62	134.23	-0.88	0.14	0.652	no	down	246.62	107.04	-1.2	0.0679	0.194	no	down	hypothetical protein EURHEDRAFT_463406 [Aspergillus ruber CBS 135680]	_	Putative uncharacterized protein	_
g3565	25.67	43.81	0.77	0.149	0.441	no	up	20.01	31.87	0.67	0.396	0.829	no	up	20.01	42.54	1.08	0.136	0.647	no	up	20.01	48.08	1.26	0.0597	0.177	no	up	LACT-domain-containing protein [Aspergillus ruber CBS 135680]	_	Phospholipid:diacylglycerol acyltransferase, putative	E2.3.1.158
g1990	27.56	46.98	0.77	0.149	0.441	no	up	22.75	41.54	0.87	0.25	0.708	no	up	22.75	35.03	0.62	0.427	0.971	no	up	22.75	87.26	1.93	0.00439	0.0237	yes	up	serine palmitoyl transferase subunit [Aspergillus ruber CBS 135680]	_	Serine palmitoyltransferase 2, putative	SPT
g2229	9.12	15.6	0.77	0.149	0.441	no	up	14.33	14.41	0.01	0.878	0.988	no	up	14.33	16.5	0.2	0.874	1	no	up	14.33	25.93	0.85	0.201	0.407	no	up	75k gamma secalin [Aspergillus ruber CBS 135680]	_	Putative uncharacterized protein	_
g3791	192.86	327.85	0.77	0.149	0.441	no	up	132.96	218.72	0.72	0.354	0.803	no	up	132.96	164.34	0.31	0.752	1	no	up	132.96	198.96	0.58	0.383	0.603	no	up	putative mitochondrial DNA replication protein [Aspergillus ruber CBS 135680]	_	Mitochondrial DNA replication protein (Yhm2), putative	_
g6687	28.81	49.04	0.77	0.149	0.441	no	up	38.02	38.81	0.03	0.905	0.989	no	up	38.02	51.1	0.43	0.617	1	no	up	38.02	63.97	0.75	0.26	0.478	no	up	DBF zinc finger domain protein [Aspergillus ruber CBS 135680]	_	G1/S regulator NimO, putative	DBF4
g7734	24.7	42.17	0.77	0.149	0.441	no	up	25.65	32.55	0.34	0.725	0.955	no	up	25.65	23.84	-0.11	0.76	1	no	down	25.65	36.89	0.52	0.436	0.653	no	up	putative tRNA methyltransferase subunit GCD14 [Aspergillus ruber CBS 135680]	_	Function: Gcd14p of S. cerevisiae is required for the biogenesis of tRNAiMet	TRM61, GCD14
g1288	88.53	151.16	0.77	0.15	0.443	no	up	68.08	110.15	0.69	0.377	0.82	no	up	68.08	104.95	0.62	0.427	0.971	no	up	68.08	129.3	0.92	0.17	0.366	no	up	bola domain protein [Aspergillus ruber CBS 135680]	_	Putative uncharacterized protein	bolA
g5664	5.05	8.7	0.77	0.15	0.443	no	up	4.92	14.31	1.52	0.0346	0.247	no	up	4.92	12.72	1.35	0.0601	0.399	no	up	4.92	12.92	1.37	0.0412	0.135	no	up	hypothetical protein EURHEDRAFT_401508 [Aspergillus ruber CBS 135680]	_	_	_
g5153	14.33	24.5	0.77	0.151	0.445	no	up	24.82	30.96	0.32	0.752	0.964	no	up	24.82	19.15	-0.37	0.476	0.986	no	down	24.82	29.81	0.26	0.7	0.843	no	up	UAA transporter [Aspergillus ruber CBS 135680]	_	Putative uncharacterized protein	SLC35B4, YEA4
g5896	13.93	23.82	0.77	0.152	0.446	no	up	21.71	17.25	-0.33	0.513	0.89	no	down	21.71	17.39	-0.32	0.531	1	no	down	21.71	37.96	0.8	0.231	0.444	no	up	MIND kinetochore complex component Mtw1 [Aspergillus ruber CBS 135680]	_	MIND kinetochore complex component Mtw1, putative	mis12, MTW1
g303	10.52	17.97	0.77	0.155	0.451	no	up	15.03	14.7	-0.03	0.84	0.982	no	down	15.03	12.26	-0.29	0.556	1	no	down	15.03	32.62	1.11	0.0979	0.251	no	up	Arv1-domain-containing protein [Aspergillus ruber CBS 135680]	_	Pc15g00380	_
g1452	1.08	1.91	0.77	0.165	0.463	no	up	1.32	1.26	-0.06	0.843	0.982	no	down	1.32	1.31	-0.01	0.882	1	no	down	1.32	3.57	1.37	0.0459	0.147	no	up	hypothetical protein EURHEDRAFT_479275 [Aspergillus ruber CBS 135680]	_	_	_
g5158	32.13	54.64	0.76	0.15	0.443	no	up	44.25	69.8	0.66	0.404	0.833	no	up	44.25	55.85	0.34	0.718	1	no	up	44.25	60.17	0.44	0.508	0.711	no	up	replication factor-a protein [Aspergillus ruber CBS 135680]	_	Single-stranded DNA-binding replication protein A	RFA1, RPA1, rpa
g4734	38.57	65.6	0.76	0.15	0.443	no	up	32.83	35.1	0.1	0.987	1	no	up	32.83	30.28	-0.12	0.746	1	no	down	32.83	70.19	1.09	0.101	0.258	no	up	mitochondrial carrier [Aspergillus ruber CBS 135680]	_	Putative uncharacterized protein	SLC25A28_37, MFRN
g132	40.76	69.33	0.76	0.15	0.443	no	up	84.16	75.76	-0.15	0.692	0.947	no	down	84.16	85.84	0.03	0.916	1	no	up	84.16	73.63	-0.19	0.759	0.88	no	down	transmembrane protein UsgS [Aspergillus ruber CBS 135680]	_	Transmembrane protein UsgS	_
g1831	43.06	73.24	0.76	0.151	0.444	no	up	13.85	45.55	1.71	0.0178	0.157	no	up	13.85	34.47	1.31	0.0712	0.445	no	up	13.85	64.28	2.21	0.00137	0.00902	yes	up	6-phosphogluconate dehydrogenase C-terminal domain-like protein [Aspergillus ruber CBS 135680]	_	6-phosphogluconate dehydrogenase family protein	_
g6853	23.22	39.42	0.76	0.151	0.444	no	up	32.37	27.32	-0.24	0.591	0.917	no	down	32.37	29.05	-0.16	0.698	1	no	down	32.37	44.42	0.46	0.496	0.703	no	up	hypothetical protein EURHEDRAFT_387823 [Aspergillus ruber CBS 135680]	_	Putative uncharacterized protein	_
g7613	51.34	87.16	0.76	0.151	0.444	no	up	26.4	34.3	0.38	0.685	0.946	no	up	26.4	42.3	0.68	0.379	0.954	no	up	26.4	73.16	1.47	0.0291	0.105	no	up	NAD dependent epimerase/dehydratase family protein [Aspergillus ruber CBS 135680]	_	NAD dependent epimerase/dehydratase family protein	rfbD, rmlD
g1792	13.26	22.59	0.76	0.151	0.445	no	up	14.6	17.96	0.3	0.773	0.97	no	up	14.6	19.25	0.4	0.65	1	no	up	14.6	26.75	0.87	0.192	0.395	no	up	conserved hypothetical protein [Aspergillus terreus NIH2624]	_	Putative uncharacterized protein	MAD1
g4389	77.48	131.27	0.76	0.151	0.445	no	up	64.98	71.94	0.15	0.955	0.999	no	up	64.98	62.39	-0.06	0.811	1	no	down	64.98	125.5	0.95	0.154	0.34	no	up	phosphoribosyl-aminoimidazole carboxylase [Aspergillus ruber CBS 135680]	_	Phosphoribosyl-aminoimidazole carboxylase	ADE2
g7693	196.65	332.63	0.76	0.152	0.446	no	up	196.29	260.83	0.41	0.646	0.935	no	up	196.29	185.92	-0.08	0.787	1	no	down	196.29	279.49	0.51	0.445	0.661	no	up	eukaryotic translation initiation factor 3 subunit EifCh [Aspergillus ruber CBS 135680]	_	Eukaryotic translation initiation factor 3 subunit H (eIF3h); Component of the eukaryotic tr [...]	EIF3H
g1125	52.44	88.98	0.76	0.152	0.446	no	up	32.37	44.5	0.46	0.597	0.917	no	up	32.37	33.54	0.05	0.945	1	no	up	32.37	66.89	1.04	0.119	0.286	no	up	hypothetical protein EURHEDRAFT_498305 [Aspergillus ruber CBS 135680]	_	Putative uncharacterized protein	MBA1
g2274	27.92	47.41	0.76	0.153	0.448	no	up	20.02	29.27	0.55	0.509	0.886	no	up	20.02	41.85	1.06	0.148	0.67	no	up	20.02	39.83	0.99	0.14	0.32	no	up	P-loop containing nucleoside triphosphate hydrolase protein [Aspergillus ruber CBS 135680]	_	Putative uncharacterized protein	CAF16
g4440	61.75	104.55	0.76	0.153	0.448	no	up	30.15	43.81	0.54	0.516	0.89	no	up	30.15	52.82	0.81	0.283	0.889	no	up	30.15	97.02	1.68	0.0129	0.0562	no	up	hypothetical protein EURHEDRAFT_404868 [Aspergillus ruber CBS 135680]	_	Predicted protein	_
g3378	10.16	17.25	0.76	0.153	0.448	no	up	9.63	13.71	0.51	0.544	0.901	no	up	9.63	15.46	0.68	0.378	0.953	no	up	9.63	22.2	1.2	0.0731	0.204	no	up	hypothetical protein EURHEDRAFT_379014 [Aspergillus ruber CBS 135680]	_	_	_
g5476	9.68	16.49	0.76	0.153	0.448	no	up	12.45	13.95	0.16	0.935	0.996	no	up	12.45	11.91	-0.06	0.81	1	no	down	12.45	18.71	0.58	0.382	0.603	no	up	actin-like protein arp6 [Aspergillus ruber CBS 135680]	_	Contig An14c0010, complete genome	ACTR6, ARP6
g1673	23.58	40.12	0.76	0.154	0.449	no	up	12.82	22.72	0.82	0.285	0.748	no	up	12.82	16.21	0.34	0.724	1	no	up	12.82	24.62	0.94	0.166	0.36	no	up	tRNAHis guanylyltransferase [Aspergillus ruber CBS 135680]	_	TRNAHis guanylyltransferase, putative	THG1
g6128	56.68	96.1	0.76	0.154	0.449	no	up	36.84	115.7	1.65	0.0219	0.182	no	up	36.84	41.03	0.16	0.936	1	no	up	36.84	103.18	1.48	0.0281	0.102	no	up	Ras-related protein RSR1 [Aspergillus oryzae RIB40]	_	Pc21g01120	_
g7203	10.85	18.41	0.76	0.154	0.449	no	up	10.11	16.85	0.73	0.344	0.797	no	up	10.11	15.93	0.65	0.399	0.961	no	up	10.11	26.86	1.4	0.0368	0.125	no	up	putative apses transcription factor [Aspergillus ruber CBS 135680]	_	Putative uncharacterized protein	_
g6769	53.99	91.36	0.76	0.154	0.449	no	up	13.02	95.01	2.86	8.91e-05	0.00294	yes	up	13.02	35.53	1.44	0.0465	0.337	no	up	13.02	47.96	1.87	0.0062	0.0311	yes	up	putative mitochondrial protein sorting [Aspergillus ruber CBS 135680]	_	Mitochondrial protein sorting (Msf1), putative	_
g6668	19.87	33.75	0.76	0.154	0.449	no	up	13.23	20.75	0.65	0.42	0.842	no	up	13.23	16.48	0.31	0.751	1	no	up	13.23	31.34	1.24	0.0665	0.191	no	up	putative nucleotide binding protein [Aspergillus ruber CBS 135680]	_	Afu6g09810 (Alt. Locus), nucleotide binding protein, putative, (6.1.1.10)	mrp, NUBPL
g7866	129.25	218.86	0.76	0.154	0.449	no	up	80.7	164.75	1.03	0.167	0.595	no	up	80.7	117.59	0.54	0.505	0.991	no	up	80.7	147.57	0.87	0.195	0.4	no	up	like-Sm ribonucleo protein [Aspergillus ruber CBS 135680]	_	Function: SMX4 of S. cerevisiae is	LSM3
g4220	4.71	8.03	0.76	0.155	0.45	no	up	8.54	8.26	-0.05	0.819	0.977	no	down	8.54	9.82	0.2	0.881	1	no	up	8.54	19.64	1.19	0.0752	0.208	no	up	putative cytochrome P450 monooxygenase [Aspergillus ruber CBS 135680]	_	Afu2g04290 (Alt. Locus), cytochrome P450 monooxygenase, putative, (1.14.-.-)	E1.14.-.-
g536	24.44	41.37	0.76	0.156	0.451	no	up	33.76	36.08	0.1	0.99	1	no	up	33.76	41.45	0.3	0.769	1	no	up	33.76	45.81	0.44	0.515	0.717	no	up	hypothetical protein EURHEDRAFT_409861 [Aspergillus ruber CBS 135680]	_	_	_
g869	51.9	87.72	0.76	0.158	0.454	no	up	23.03	46.87	1.02	0.178	0.615	no	up	23.03	29.04	0.33	0.741	1	no	up	23.03	59.51	1.37	0.0467	0.149	no	up	hypothetical protein EURHEDRAFT_408518 [Aspergillus ruber CBS 135680]	_	Putative uncharacterized protein	_
g5551	9.24	15.74	0.76	0.161	0.457	no	up	6.03	12.45	1.03	0.175	0.61	no	up	6.03	10.46	0.78	0.322	0.918	no	up	6.03	8.33	0.46	0.513	0.716	no	up	hypothetical protein EURHEDRAFT_415307 [Aspergillus ruber CBS 135680]	_	Putative uncharacterized protein	_
g6934	5.26	8.96	0.76	0.166	0.464	no	up	3.55	2.66	-0.4	0.478	0.873	no	down	3.55	3.22	-0.14	0.766	1	no	down	3.55	8.89	1.3	0.0595	0.177	no	up	NADH:flavin oxidoreductase/NADH oxidase family protein [Aspergillus ruber CBS 135680]	_	_	_
g5852	1.41	2.45	0.76	0.238	0.567	no	up	0.65	3.22	2.15	0.0132	0.126	no	up	0.65	2.13	1.57	0.0668	0.428	no	up	0.65	0.87	0	1	1	no	no change	hypothetical protein ACLA_043250 [Aspergillus clavatus NRRL 1]	_	_	_
g2048	1306.12	2204.02	0.75	0.153	0.448	no	up	1064.17	1229.91	0.21	0.879	0.988	no	up	1064.17	907.41	-0.23	0.616	1	no	down	1064.17	1738.26	0.71	0.287	0.509	no	up	60S ribosomal protein L6 [Aspergillus ruber CBS 135680]	_	Remark: L6 of S. cerevisiae belongs to the L6E family of ribosomal proteins	RP-L6e, RPL6
g7041	666.66	1124.76	0.75	0.153	0.448	no	up	652.31	838.19	0.36	0.699	0.949	no	up	652.31	722.01	0.15	0.942	1	no	up	652.31	1044.4	0.68	0.307	0.531	no	up	elongation factor [Aspergillus ruber CBS 135680]	_	Contig An07c0070, complete genome	EF3, TEF3
g3707	226.57	382.17	0.75	0.154	0.449	no	up	245.16	280.93	0.2	0.894	0.988	no	up	245.16	249.92	0.03	0.914	1	no	up	245.16	382.17	0.64	0.336	0.558	no	up	hypothetical protein EURHEDRAFT_487030 [Aspergillus ruber CBS 135680]	_	Eukaryotic translation initiation factor 3 subunit C (eIF3c)(Eukaryotic translation initiati [...]	EIF3C
g5945	1686.78	2843.88	0.75	0.154	0.449	no	up	1573.08	1363.97	-0.21	0.63	0.93	no	down	1573.08	2064	0.39	0.654	1	no	up	1573.08	2552.96	0.7	0.293	0.516	no	up	1510195A ATP synthase 9 [Aspergillus ruber CBS 135680]	_	Catalytic activity: ATP + H2O = ADP + orthophosphate	ATPeF0C, ATP5G, ATP9
g1965	209.32	352.85	0.75	0.154	0.449	no	up	162.34	227.41	0.49	0.565	0.911	no	up	162.34	184.86	0.19	0.892	1	no	up	162.34	331.51	1.03	0.122	0.29	no	up	putative translation elongation factor EF-Tu [Aspergillus ruber CBS 135680]	_	Elongation factor Tu ; This protein promotes the GTP-dependent binding of aminoacyl-tRNA to [...]	tuf, TUFM
g7188	37.52	63.29	0.75	0.154	0.45	no	up	60.11	62.89	0.07	0.947	0.997	no	up	60.11	48.94	-0.3	0.547	1	no	down	60.11	89.81	0.58	0.385	0.606	no	up	putative cation transporting ATPase [Aspergillus ruber CBS 135680]	_	Cation transporting ATPase, putative	ATP13A1
g2341	98.18	165.45	0.75	0.154	0.45	no	up	146.49	98.09	-0.58	0.296	0.762	no	down	146.49	120.01	-0.29	0.556	1	no	down	146.49	159.97	0.13	0.857	0.936	no	up	cytosolic hydroxymethyltransferase [Aspergillus ruber CBS 135680]	_	Serine hydroxymethyltransferase (EC 2.1.2.1); Interconversion of serine and glycine (By simi [...]	glyA, SHMT
g2166	12.94	21.88	0.75	0.155	0.45	no	up	20.36	20.76	0.03	0.903	0.989	no	up	20.36	25.38	0.32	0.739	1	no	up	20.36	36.32	0.83	0.211	0.42	no	up	putative pheromone-dependent cell cycle arrest protein Far11 [Aspergillus ruber CBS 135680]	_	Afu6g04250 (Alt. Locus), pheromone-dependent cell cycle arrest protein Far11, putative, simi [...]	_
g6192	15.07	25.48	0.75	0.155	0.45	no	up	14.05	13.11	-0.1	0.754	0.965	no	down	14.05	16.95	0.27	0.797	1	no	up	14.05	33.37	1.24	0.0631	0.184	no	up	hypothetical protein EURHEDRAFT_471184 [Aspergillus ruber CBS 135680]	_	_	_
g7244	115.66	194.68	0.75	0.155	0.45	no	up	110.82	133.48	0.27	0.808	0.975	no	up	110.82	106.05	-0.06	0.805	1	no	down	110.82	96.15	-0.2	0.745	0.871	no	down	putative BAR adaptor protein [Aspergillus ruber CBS 135680]	_	Reduced viability upon starvation protein 167	AMPH
g7178	48.73	82.19	0.75	0.155	0.45	no	up	47.16	55.62	0.24	0.846	0.982	no	up	47.16	86.02	0.87	0.244	0.843	no	up	47.16	99.75	1.08	0.106	0.265	no	up	Oxysterol-binding protein [Aspergillus ruber CBS 135680]	_	Function: different OSBPs have different functions	_
g7260	63.15	106.27	0.75	0.155	0.451	no	up	74	126.03	0.77	0.316	0.775	no	up	74	72.93	-0.02	0.855	1	no	down	74	133.47	0.85	0.201	0.407	no	up	chitin synthase G [Aspergillus ruber CBS 135680]	_	Catalytic activity: UDP-N-acetyl-D-glucosamine + (EC 2.4.1.16)	CHS1
g5768	6.48	10.98	0.75	0.155	0.451	no	up	4.36	6.38	0.54	0.509	0.887	no	up	4.36	7.7	0.81	0.281	0.885	no	up	4.36	10.4	1.24	0.0644	0.187	no	up	hypothetical protein EURHEDRAFT_411063 [Aspergillus ruber CBS 135680]	_	Putative uncharacterized protein	_
g1929	40.06	67.5	0.75	0.156	0.451	no	up	33.55	119.7	1.83	0.0103	0.105	no	up	33.55	34.54	0.04	0.933	1	no	up	33.55	53.05	0.66	0.322	0.546	no	up	hypothetical protein EURHEDRAFT_515351 [Aspergillus ruber CBS 135680]	_	G2/M phase checkpoint control protein Sum2, putative	LSM14, RAP55, SCD6
g8104	990.61	1663.5	0.75	0.156	0.451	no	up	875.04	1043.44	0.25	0.825	0.978	no	up	875.04	647.97	-0.43	0.417	0.969	no	down	875.04	1363.13	0.64	0.336	0.559	no	up	60S ribosomal protein L4-2 [Aspergillus ruber CBS 135680]	_	60S ribosomal protein L4-2	RP-L4e, RPL4
g5532	46.64	78.46	0.75	0.157	0.451	no	up	35.33	58.1	0.72	0.356	0.804	no	up	35.33	81.76	1.21	0.0939	0.523	no	up	35.33	84.99	1.26	0.0588	0.175	no	up	Pc16g01830 [Penicillium rubens Wisconsin 54-1255]	_	Pc16g01830	_
g6176	20.93	35.27	0.75	0.157	0.451	no	up	32.89	42.5	0.37	0.692	0.947	no	up	32.89	24.19	-0.44	0.412	0.967	no	down	32.89	42.68	0.37	0.577	0.764	no	up	putative spermine/spermidine synthase [Aspergillus ruber CBS 135680]	_	Afu5g08500 (Alt. Locus), spermine/spermidine synthase family protein	_
g1292	113.21	190.03	0.75	0.157	0.452	no	up	119.95	114.44	-0.07	0.788	0.974	no	down	119.95	95.53	-0.33	0.515	0.995	no	down	119.95	170.81	0.51	0.445	0.661	no	up	eukaryotic translation initiation factor 4E-1 [Aspergillus ruber CBS 135680]	_	Translation initiation factor 4F	EIF4E
g1674	41.36	69.64	0.75	0.157	0.453	no	up	19.53	42.55	1.12	0.129	0.516	no	up	19.53	33.37	0.77	0.313	0.911	no	up	19.53	59.31	1.6	0.0184	0.0744	no	up	hypothetical protein EURHEDRAFT_408269, partial [Aspergillus ruber CBS 135680]	_	_	TMA23
g6587	21.81	36.77	0.75	0.158	0.455	no	up	35.7	32.77	-0.12	0.724	0.955	no	down	35.7	29.05	-0.3	0.549	1	no	down	35.7	56.45	0.66	0.323	0.547	no	up	hypothetical protein EURHEDRAFT_400015 [Aspergillus ruber CBS 135680]	_	Putative uncharacterized protein	_
g6389	11.23	18.9	0.75	0.158	0.455	no	up	17	15.46	-0.14	0.708	0.951	no	down	17	17.08	0.01	0.891	1	no	up	17	28.6	0.75	0.261	0.48	no	up	putative spindle pole body component [Aspergillus ruber CBS 135680]	_	Spindle pole body component (Alp6), putative	TUBGCP3, GCP3
g1757	21.64	36.37	0.75	0.159	0.456	no	up	6.55	7.39	0.17	0.929	0.995	no	up	6.55	11.05	0.75	0.333	0.926	no	up	6.55	60.17	3.18	8.73e-06	0.000108	yes	up	hypothetical protein EURHEDRAFT_408373 [Aspergillus ruber CBS 135680]	_	SUN domain protein (Adg3), putative	_
g1142	9.44	15.97	0.75	0.159	0.456	no	up	11.53	12.01	0.06	0.948	0.997	no	up	11.53	11.02	-0.06	0.806	1	no	down	11.53	17.4	0.59	0.38	0.601	no	up	DASH complex, subunit Spc34 [Aspergillus ruber CBS 135680]	_	Pc20g07850	_
g7504	15.64	26.28	0.75	0.16	0.456	no	up	19.7	29.47	0.58	0.476	0.872	no	up	19.7	6.36	-1.62	0.0111	0.12	no	down	19.7	7.64	-1.36	0.0412	0.135	no	down	hypothetical protein EURHEDRAFT_382187 [Aspergillus ruber CBS 135680]	_	_	_
g3178	48.73	81.82	0.75	0.16	0.456	no	up	5.87	48.69	3.03	4.71e-05	0.0018	yes	up	5.87	170.86	4.84	8.13e-10	1.21e-07	yes	up	5.87	13.43	1.18	0.091	0.239	no	up	hypothetical protein EURHEDRAFT_91529 [Aspergillus ruber CBS 135680]	_	_	_
g1190	21.85	36.73	0.75	0.163	0.461	no	up	41.36	49.58	0.26	0.817	0.977	no	up	41.36	40.74	-0.02	0.857	1	no	down	41.36	55.47	0.42	0.532	0.731	no	up	integral membrane protein [Aspergillus ruber CBS 135680]	_	Putative uncharacterized protein	_
g5957	14.08	23.76	0.75	0.163	0.461	no	up	17.04	41.9	1.29	0.0765	0.394	no	up	17.04	24.53	0.52	0.524	0.999	no	up	17.04	29.81	0.8	0.235	0.45	no	up	conserved hypothetical protein [Aspergillus clavatus NRRL 1]	_	Putative uncharacterized protein	_
g8068	28.52	47.91	0.75	0.163	0.461	no	up	41.69	42.12	0.01	0.894	0.988	no	up	41.69	55.58	0.41	0.633	1	no	up	41.69	60.77	0.54	0.423	0.641	no	up	GAF domain nucleotide-binding protein [Aspergillus ruber CBS 135680]	_	GAF domain-containing protein	E1.8.4.14
g3121	3.51	5.97	0.75	0.175	0.476	no	up	6.85	8.85	0.36	0.704	0.95	no	up	6.85	8.63	0.33	0.73	1	no	up	6.85	18.13	1.39	0.0395	0.131	no	up	hypothetical protein EURHEDRAFT_457920 [Aspergillus ruber CBS 135680]	_	Predicted protein	MNN2
g1410	1.3	2.26	0.75	0.209	0.523	no	up	7.95	4.1	-0.94	0.131	0.519	no	down	7.95	0.22	-4.65	2.79e-08	2.57e-06	yes	down	7.95	1.03	-2.83	0.000149	0.00134	yes	down	glycoside hydrolase [Aspergillus ruber CBS 135680]	_	Endoglucanase, putative	_
g214	91.76	153.78	0.74	0.158	0.454	no	up	39.85	126.23	1.66	0.0202	0.171	no	up	39.85	49.67	0.32	0.739	1	no	up	39.85	146.82	1.88	0.00558	0.0286	yes	up	hypothetical protein EURHEDRAFT_513396 [Aspergillus ruber CBS 135680]	_	Putative uncharacterized protein	_
g5207	226.01	378.63	0.74	0.158	0.454	no	up	130.81	179.85	0.46	0.593	0.917	no	up	130.81	230.26	0.82	0.275	0.876	no	up	130.81	294.66	1.17	0.0793	0.216	no	up	hypothetical protein EURHEDRAFT_413878 [Aspergillus ruber CBS 135680]	_	Hexokinase (EC 2.7.1.1)	HK
g3483	1364.31	2282.77	0.74	0.159	0.455	no	up	974.81	1287.71	0.4	0.655	0.936	no	up	974.81	885.12	-0.14	0.716	1	no	down	974.81	1749.66	0.84	0.204	0.412	no	up	40S ribosomal protein S7 [Aspergillus ruber CBS 135680]	_	40S ribosomal protein S7	RP-S7e, RPS7
g3010	114.97	192.52	0.74	0.159	0.455	no	up	293.68	292.65	-0.01	0.862	0.984	no	down	293.68	220.57	-0.41	0.435	0.975	no	down	293.68	162.52	-0.85	0.191	0.393	no	down	hypothetical protein EURHEDRAFT_26813 [Aspergillus ruber CBS 135680]	_	Integral membrane protein	_
g477	223.39	374.4	0.74	0.159	0.455	no	up	65.3	159.79	1.29	0.0771	0.396	no	up	65.3	187.55	1.52	0.0339	0.277	no	up	65.3	296.74	2.18	0.00154	0.00991	yes	up	hypothetical protein EURHEDRAFT_400695 [Aspergillus ruber CBS 135680]	_	Putative uncharacterized protein	TIM13
g7153	152.34	254.58	0.74	0.16	0.456	no	up	73.9	236.07	1.67	0.0193	0.165	no	up	73.9	71.43	-0.05	0.823	1	no	down	73.9	154.99	1.07	0.109	0.27	no	up	putative IMP dehydrogenase [Aspergillus ruber CBS 135680]	_	Afu2g03610 (Alt. Locus), IMP dehydrogenase, putative, similar to inosine-5'-monophosphate de [...]	guaB
g6435	136.83	229.07	0.74	0.16	0.456	no	up	76.13	106.92	0.49	0.566	0.912	no	up	76.13	105.32	0.47	0.575	1	no	up	76.13	207.08	1.44	0.0322	0.114	no	up	hypothetical protein EURHEDRAFT_413060 [Aspergillus ruber CBS 135680]	_	_	_
g1572	21.65	36.2	0.74	0.16	0.456	no	up	19.96	23.44	0.23	0.852	0.982	no	up	19.96	28.35	0.5	0.535	1	no	up	19.96	50.5	1.33	0.0457	0.146	no	up	importin subunit beta-2 [Aspergillus ruber CBS 135680]	_	Importin beta-2 subunit, putative	_
g6578	13.78	23.12	0.74	0.16	0.456	no	up	15.69	17.37	0.15	0.958	0.999	no	up	15.69	19.48	0.31	0.747	1	no	up	15.69	23.14	0.56	0.403	0.621	no	up	pH-response regulator protein palA/RIM20 [Aspergillus ruber CBS 135680]	_	PH-response regulator protein palA/RIM20	PDCD6IP, ALIX, RIM20
g3662	68.03	113.8	0.74	0.161	0.457	no	up	47.96	83.89	0.81	0.292	0.758	no	up	47.96	113.81	1.24	0.0844	0.492	no	up	47.96	149.45	1.64	0.0154	0.0647	no	up	Phosducin family protein [Aspergillus ruber CBS 135680]	_	Phosducin family protein	_
g3956	240.45	400.91	0.74	0.161	0.458	no	up	144.42	221.93	0.62	0.436	0.852	no	up	144.42	170.78	0.24	0.827	1	no	up	144.42	300.86	1.06	0.112	0.274	no	up	putative ribosome associated DnaJ chaperone Zuotin [Aspergillus ruber CBS 135680]	_	Complex: zuotin of S. cerevisiae is a component of the RAC	DNAJC2
g7730	49.33	82.32	0.74	0.161	0.458	no	up	59.2	56.67	-0.06	0.794	0.975	no	down	59.2	48.45	-0.29	0.555	1	no	down	59.2	101.85	0.78	0.24	0.456	no	up	putative D-xylulose kinase A [Aspergillus ruber CBS 135680]	_	D-xylulose kinase	xylB, XYLB
g1343	88.66	147.81	0.74	0.161	0.458	no	up	59.92	75.62	0.34	0.73	0.956	no	up	59.92	59.22	-0.02	0.861	1	no	down	59.92	86.18	0.52	0.432	0.65	no	up	or S-antigen, N-terminal domain protein [Aspergillus ruber CBS 135680]	_	Arrestin (Or S-antigen), N-terminal domain protein	_
g4428	9.21	15.5	0.74	0.163	0.46	no	up	7.15	17.41	1.27	0.0812	0.407	no	up	7.15	16.5	1.2	0.1	0.542	no	up	7.15	12.67	0.82	0.226	0.437	no	up	RNA methylase family protein [Aspergillus ruber CBS 135680]	_	RNA methylase family UPF0020 protein	TRM11, TRMT11
g5299	30.65	51.42	0.74	0.163	0.461	no	up	51.56	55.61	0.11	1	1	no	up	51.56	30.34	-0.76	0.196	0.765	no	down	51.56	67.48	0.39	0.567	0.756	no	up	putative phosphatase-like protein [Aspergillus ruber CBS 135680]	_	Phosphatase-like protein (PTPLA), putative	PHS1, PAS2
g6724	23.23	38.93	0.74	0.163	0.461	no	up	12.82	21.71	0.76	0.332	0.787	no	up	12.82	13.63	0.09	0.993	1	no	up	12.82	28.23	1.13	0.0937	0.244	no	up	putative ubiquinone biosynthesis methyltransferase Coq5 [Aspergillus ruber CBS 135680]	_	Ubiquinone biosynthesis methlytransferase Coq5, putative	COQ5
g2644	47.16	78.58	0.74	0.163	0.461	no	up	120.91	107.86	-0.16	0.677	0.943	no	down	120.91	78.35	-0.63	0.272	0.873	no	down	120.91	132.01	0.13	0.858	0.936	no	up	hypothetical protein EURHEDRAFT_407750 [Aspergillus ruber CBS 135680]	_	Oligosaccharyltransferase subunit ribophorin II, putative	SWP1, RPN2
g6266	52.78	87.98	0.74	0.164	0.462	no	up	24.82	59.96	1.27	0.0826	0.409	no	up	24.82	47.3	0.93	0.212	0.788	no	up	24.82	75.23	1.6	0.0184	0.0744	no	up	hypothetical protein EURHEDRAFT_517254 [Aspergillus ruber CBS 135680]	_	Mitochondrial ribosomal protein L43, putative	MRPL43
g7968	11.27	18.87	0.74	0.164	0.463	no	up	18.02	21.25	0.24	0.845	0.982	no	up	18.02	14.98	-0.26	0.582	1	no	down	18.02	27.22	0.59	0.376	0.596	no	up	putative nuclear envelope protein Brr6 [Aspergillus ruber CBS 135680]	_	Nuclear envelope protein Brr6, putative	_
g4640	33.27	55.49	0.74	0.166	0.464	no	up	18.28	41.15	1.17	0.114	0.485	no	up	18.28	41.07	1.16	0.112	0.581	no	up	18.28	46.58	1.34	0.0469	0.149	no	up	hypothetical protein EURHEDRAFT_415197 [Aspergillus ruber CBS 135680]	_	Putative uncharacterized protein	_
g3012	2.53	4.29	0.74	0.167	0.465	no	up	2.49	2.8	0.16	0.948	0.997	no	up	2.49	3.51	0.48	0.577	1	no	up	2.49	6.2	1.28	0.0576	0.173	no	up	hypothetical protein EURHEDRAFT_407690 [Aspergillus ruber CBS 135680]	_	_	_
g6590	0.26	0.5	0.74	0.303	0.638	no	up	0.29	1.3	1.84	0.0233	0.191	no	up	0.29	0.14	0	1	1	no	no change	0.29	0.21	0	1	1	no	no change	UPF0187 domain membrane protein [Aspergillus ruber CBS 135680]	_	Putative uncharacterized protein	_
g7801	0.33	0.62	0.74	0.303	0.638	no	up	0.64	1.23	0.85	0.352	0.802	no	up	0.64	0.8	0.28	0.914	1	no	up	0.64	0.63	-0.02	1	1	no	down	meiotic recombination protein spo11 [Aspergillus oryzae RIB40]	_	Meiotic recombination protein spo11	SPO11
g6224	86.33	143.66	0.73	0.162	0.46	no	up	84.62	94.02	0.15	0.948	0.997	no	up	84.62	99.04	0.23	0.845	1	no	up	84.62	149.92	0.82	0.215	0.424	no	up	arginyl-tRNA synthetase, cytoplasmic [Aspergillus ruber CBS 135680]	_	Afu2g14030 (Alt. Locus), arginyl-tRNA synthetase, (6.1.1.19)	RARS, argS
g2944	58.63	97.5	0.73	0.163	0.461	no	up	57.97	68.37	0.24	0.844	0.982	no	up	57.97	53.98	-0.1	0.76	1	no	down	57.97	112.74	0.96	0.15	0.334	no	up	cyclin-domain-containing protein [Aspergillus ruber CBS 135680]	_	Pc22g11620	_
g368	15.79	26.29	0.73	0.163	0.461	no	up	15.73	22.35	0.5	0.545	0.901	no	up	15.73	26.83	0.77	0.308	0.909	no	up	15.73	37.4	1.24	0.0621	0.182	no	up	putative dynactin [Aspergillus ruber CBS 135680]	_	Dynactin, putative	DCTN1
g6700	39.42	65.66	0.73	0.164	0.462	no	up	30.4	35.17	0.21	0.88	0.988	no	up	30.4	54.71	0.85	0.258	0.86	no	up	30.4	86.8	1.51	0.025	0.0937	no	up	3(2),5-bisphosphate nucleotidase HAL2 [Aspergillus ruber CBS 135680]	_	3'(2'),5'-bisphosphate nucleotidase	cysQ, MET22, BPNT1
g1369	28.1	46.71	0.73	0.164	0.462	no	up	20.93	39.87	0.93	0.214	0.666	no	up	20.93	23.16	0.15	0.944	1	no	up	20.93	58.76	1.48	0.027	0.0996	no	up	DEAD-domain-containing protein [Aspergillus ruber CBS 135680]	_	ATP-dependent RNA helicase ded1 (EC 3.6.1.-); ATP-binding RNA helicase involved in translati [...]	DDX3X, bel
g875	27.29	45.3	0.73	0.165	0.463	no	up	28.08	40.24	0.52	0.532	0.897	no	up	28.08	36.36	0.37	0.676	1	no	up	28.08	52.4	0.9	0.177	0.376	no	up	subunit of the multi protein cohesin complex [Aspergillus ruber CBS 135680]	_	Cohesin complex subunit (Psm1), putative	SMC1
g6384	21.03	35.02	0.73	0.165	0.463	no	up	26.42	24.15	-0.13	0.717	0.952	no	down	26.42	28.83	0.13	0.968	1	no	up	26.42	46.23	0.8	0.228	0.44	no	up	endochitinase 1 [Aspergillus ruber CBS 135680]	_	Class V chitinase, putative	E3.2.1.14
g2300	101.68	168.47	0.73	0.166	0.464	no	up	72.3	112.45	0.64	0.422	0.842	no	up	72.3	104.48	0.53	0.511	0.993	no	up	72.3	130.67	0.85	0.2	0.407	no	up	30S ribosomal protein S10 [Aspergillus ruber CBS 135680]	_	Afu6g05330 (Alt. Locus), 37 ribosomal protein Rsm10, putative, similar to mitochondrial ribo [...]	RP-S10, MRPS10, rpsJ
g3033	17.26	28.67	0.73	0.166	0.464	no	up	19.26	30.32	0.65	0.409	0.838	no	up	19.26	20.07	0.06	0.954	1	no	up	19.26	24.92	0.37	0.583	0.768	no	up	tyrosyl-tRNA synthetase mitochondrial precursor [Aspergillus ruber CBS 135680]	_	Tyrosyl-tRNA synthetase, mitochondrial (Tyrosine--tRNA)	YARS, tyrS
g5784	1.48	2.52	0.73	0.166	0.464	no	up	0.74	0.28	-1.14	0.061	0.349	no	down	0.74	3.3	2.02	0.00392	0.0532	no	up	0.74	4.19	2.35	0.000539	0.00411	yes	up	WD40 repeat-like protein [Aspergillus ruber CBS 135680]	_	_	_
g6037	89.41	148.03	0.73	0.166	0.464	no	up	159.08	171.72	0.11	0.999	1	no	up	159.08	137.29	-0.21	0.635	1	no	down	159.08	227.56	0.52	0.439	0.656	no	up	putative cyclopropane-fatty-acyl-phospholipid synthase [Aspergillus ruber CBS 135680]	_	Cyclopropane-fatty-acyl-phospholipid synthase, putative	cfa
g6404	59.2	98.08	0.73	0.166	0.464	no	up	75.8	75.93	0	0.872	0.987	no	up	75.8	134.01	0.82	0.272	0.873	no	up	75.8	78.33	0.05	0.954	0.983	no	up	Ureohydrolase [Aspergillus ruber CBS 135680]	_	Arginase argA-Aspergillus niger (EC 3.5.3.1)	E3.5.3.1, rocF, arg
g7555	6.39	10.63	0.73	0.167	0.465	no	up	12.61	9.99	-0.33	0.503	0.885	no	down	12.61	8.16	-0.62	0.275	0.876	no	down	12.61	21.84	0.79	0.237	0.453	no	up	sulfatase domain protein [Aspergillus ruber CBS 135680]	_	_	_
g1807	142.13	235.79	0.73	0.167	0.465	no	up	43.8	277.76	2.66	0.000246	0.00632	yes	up	43.8	31.32	-0.48	0.393	0.961	no	down	43.8	53.52	0.29	0.68	0.83	no	up	_	_	_	_
g7475	16.51	27.48	0.73	0.167	0.465	no	up	26.99	23.36	-0.21	0.632	0.931	no	down	26.99	17.25	-0.64	0.262	0.864	no	down	26.99	39	0.53	0.43	0.648	no	up	hypothetical protein EURHEDRAFT_505034 [Aspergillus ruber CBS 135680]	_	Dolichyl-phosphate beta-glucosyltransferase, putative	ALG5
g2857	32.04	53.21	0.73	0.168	0.467	no	up	26.46	33.21	0.33	0.741	0.962	no	up	26.46	44.61	0.75	0.323	0.919	no	up	26.46	45.58	0.78	0.244	0.459	no	up	chorismate mutase/prephenate dehydratase [Aspergillus ruber CBS 135680]	_	Contig An17c0110, complete genome. Precursor (EC 4.2.1.51)	pheA2
g1024	6.77	11.32	0.73	0.169	0.47	no	up	4.28	8.33	0.94	0.21	0.662	no	up	4.28	5.33	0.31	0.76	1	no	up	4.28	12.59	1.53	0.024	0.0911	no	up	putative pantothenate kinase [Aspergillus ruber CBS 135680]	_	Pantothenate kinase, putative	coaW
g8109	11.12	18.5	0.73	0.171	0.472	no	up	10.08	10.45	0.05	0.942	0.997	no	up	10.08	10.06	0	0.887	1	no	down	10.08	17.2	0.77	0.258	0.477	no	up	WD domain protein [Aspergillus ruber CBS 135680]	_	Pc21g16360	MORG1
g7115	12.44	20.72	0.73	0.174	0.475	no	up	12.48	21.94	0.81	0.3	0.765	no	up	12.48	16.98	0.44	0.615	1	no	up	12.48	25.04	1	0.144	0.325	no	up	hypothetical protein EURHEDRAFT_449360 [Aspergillus ruber CBS 135680]	_	Putative uncharacterized protein	_
g4360	27.31	45.34	0.73	0.179	0.484	no	up	37.95	45.68	0.27	0.819	0.977	no	up	37.95	56.5	0.57	0.484	0.988	no	up	37.95	53.21	0.49	0.475	0.688	no	up	Yos1-like protein [Aspergillus ruber CBS 135680]	_	Similarity to hypothetical protein SPAC19A8.09 - Schizosaccharomyces pombe Precursor	_
g3424	23.5	38.87	0.72	0.168	0.466	no	up	23.98	31.96	0.41	0.643	0.933	no	up	23.98	26.74	0.16	0.93	1	no	up	23.98	40.99	0.77	0.246	0.462	no	up	WD40 repeat-like protein [Aspergillus ruber CBS 135680]	_	C2H2 finger domain protein, putative	_
g1170	25.79	42.62	0.72	0.168	0.467	no	up	35.88	26.1	-0.46	0.388	0.826	no	down	35.88	31.59	-0.18	0.668	1	no	down	35.88	54.53	0.6	0.365	0.586	no	up	hypothetical protein EURHEDRAFT_376784 [Aspergillus ruber CBS 135680]	_	oxysterol binding protein (Osh3), putative (AFU_orthologue; AFUA_3G05880)	_
g2856	17	28.15	0.72	0.17	0.471	no	up	20.44	34.92	0.77	0.317	0.776	no	up	20.44	35.27	0.78	0.3	0.905	no	up	20.44	32.15	0.65	0.332	0.555	no	up	hypothetical protein EURHEDRAFT_468863 [Aspergillus ruber CBS 135680]	_	Similarity to hypothetical protein SPBC1105.15c - Schizosaccharomyces pombe	_
g1112	30.66	50.65	0.72	0.17	0.471	no	up	39.7	38.82	-0.03	0.83	0.98	no	down	39.7	37.88	-0.07	0.802	1	no	down	39.7	60.65	0.61	0.361	0.582	no	up	putative 2-dehydropantoate 2-reductase [Aspergillus ruber CBS 135680]	_	Afu3g06390 (Alt. Locus), 2-dehydropantoate 2-reductase, putative, (1.1.1.169)	panE, apbA
g4791	47.63	78.52	0.72	0.171	0.471	no	up	38.64	45.2	0.23	0.862	0.984	no	up	38.64	64.08	0.73	0.34	0.929	no	up	38.64	79.34	1.04	0.122	0.29	no	up	transcription initiation factor IIE, beta subunit [Aspergillus ruber CBS 135680]	_	Remark: components of the RNA polymerase II holoenzyme	TFIIE2, GTF2E2, TFA2
g5690	22.05	36.27	0.72	0.171	0.471	no	up	27.4	22.62	-0.28	0.558	0.906	no	down	27.4	18.87	-0.54	0.333	0.926	no	down	27.4	61.57	1.17	0.0803	0.218	no	up	hypothetical protein EURHEDRAFT_453117 [Aspergillus ruber CBS 135680]	_	Na+/H+ antiporter Nha1	_
g2892	32.74	54.11	0.72	0.171	0.471	no	up	31.55	53.77	0.77	0.32	0.781	no	up	31.55	22.36	-0.49	0.374	0.95	no	down	31.55	64.7	1.03	0.123	0.292	no	up	putative cell polarity protein [Aspergillus ruber CBS 135680]	_	Putative uncharacterized protein	TBCB, CKAP1, ALF1
g4086	23.47	38.72	0.72	0.171	0.471	no	up	21.4	24.8	0.21	0.874	0.987	no	up	21.4	20.34	-0.07	0.795	1	no	down	21.4	32.78	0.61	0.358	0.579	no	up	Nop53-domain-containing protein [Aspergillus ruber CBS 135680]	_	Function: RNH70 is involved in DNA replication and RNA processing	REXO4, REX4
g1159	155.73	256.11	0.72	0.171	0.471	no	up	92.55	140.04	0.6	0.458	0.862	no	up	92.55	160	0.79	0.294	0.899	no	up	92.55	245.8	1.41	0.0359	0.122	no	up	essential for mitotic growth 1 [Aspergillus ruber CBS 135680]	_	Pc20g07960	EMG1, NEP1
g3728	44.89	73.94	0.72	0.171	0.471	no	up	49.87	62.14	0.32	0.752	0.964	no	up	49.87	52.8	0.08	0.982	1	no	up	49.87	69.33	0.47	0.479	0.69	no	up	hypothetical protein EURHEDRAFT_416124 [Aspergillus ruber CBS 135680]	_	DNA-directed RNA polymerase subunit E'	RPB7, POLR2G
g4668	39.97	65.8	0.72	0.171	0.472	no	up	125.94	38	-1.73	0.00656	0.0762	no	down	125.94	16.18	-2.95	1.61e-05	0.000584	yes	down	125.94	100.57	-0.32	0.611	0.789	no	down	hypothetical protein EURHEDRAFT_251727 [Aspergillus ruber CBS 135680]	_	Putative uncharacterized protein	_
g1844	122.23	201.11	0.72	0.171	0.472	no	up	95.7	145.94	0.61	0.449	0.857	no	up	95.7	113.03	0.24	0.831	1	no	up	95.7	150.93	0.66	0.326	0.549	no	up	DUF543 domain protein [Aspergillus ruber CBS 135680]	_	Afu1g13195 (Alt. Locus), DUF543 domain protein	MINOS1, MOS1
g248	64.15	105.77	0.72	0.171	0.472	no	up	50.3	68.35	0.44	0.614	0.923	no	up	50.3	74.01	0.56	0.49	0.988	no	up	50.3	115.44	1.2	0.0747	0.207	no	up	putative ADP-ribosylation factor [Aspergillus ruber CBS 135680]	_	Function: biochemical analyses of purified recombinant yeast ARL1	ARL1
g8352	105.21	173.19	0.72	0.172	0.472	no	up	63.54	52.36	-0.28	0.562	0.909	no	down	63.54	218.59	1.78	0.0126	0.131	no	up	63.54	273.36	2.1	0.00216	0.0131	yes	up	putative phosphotransmitter protein Ypd1 [Aspergillus ruber CBS 135680]	_	Phosphotransmitter protein Ypd1, putative	YPD1
g3635	77.27	126.97	0.72	0.172	0.473	no	up	58.65	71.36	0.28	0.794	0.975	no	up	58.65	90.36	0.62	0.426	0.971	no	up	58.65	122.34	1.06	0.113	0.276	no	up	putative 40S ribosomal protein S14 [Aspergillus ruber CBS 135680]	_	Mitochondrial 40S ribosomal protein MRP2	RP-S14, MRPS14, rpsN
g4373	20.72	34.18	0.72	0.172	0.473	no	up	18.54	22.16	0.26	0.823	0.978	no	up	18.54	28.07	0.6	0.45	0.975	no	up	18.54	28.83	0.63	0.347	0.569	no	up	SAM binding motif-containing protein [Aspergillus ruber CBS 135680]	_	SAM binding motif containing protein	_
g7294	20	33.07	0.72	0.173	0.474	no	up	19.07	29.2	0.61	0.448	0.857	no	up	19.07	26.67	0.48	0.568	1	no	up	19.07	28.53	0.58	0.391	0.611	no	up	conserved hypothetical protein [Aspergillus fumigatus Af293]	_	_	_
g1425	67.33	110.95	0.72	0.173	0.474	no	up	45.14	73.87	0.71	0.367	0.812	no	up	45.14	67.95	0.59	0.462	0.981	no	up	45.14	105.47	1.22	0.0707	0.2	no	up	hypothetical protein EURHEDRAFT_412679 [Aspergillus ruber CBS 135680]	_	Ribosomal protein L36	RP-L36, MRPL36, rpmJ
g1036	6.59	10.89	0.72	0.173	0.474	no	up	3.99	9.17	1.18	0.106	0.468	no	up	3.99	7.35	0.87	0.244	0.843	no	up	3.99	18.11	2.15	0.0017	0.0108	yes	up	hypothetical protein EURHEDRAFT_376650 [Aspergillus ruber CBS 135680]	_	_	_
g4132	18.16	29.92	0.72	0.177	0.48	no	up	17.78	19.51	0.13	0.974	1	no	up	17.78	18.31	0.04	0.937	1	no	up	17.78	33.37	0.9	0.181	0.38	no	up	putative methyltransferase [Aspergillus ruber CBS 135680]	_	Methyltransferase, putative	N6AMT1
g1364	3.87	6.43	0.72	0.178	0.481	no	up	3.56	3.16	-0.17	0.702	0.949	no	down	3.56	2.08	-0.75	0.223	0.809	no	down	3.56	2.33	-0.59	0.379	0.599	no	down	phosphoglycerate mutase-like protein [Aspergillus ruber CBS 135680]	_	Afu7g01240 (Alt. Locus), phytase, putative, similar to phytase (GI:2108356) (Talaromyces the [...]	E3.1.3.8
g2700	11.06	18.33	0.72	0.178	0.482	no	up	20.88	23.24	0.15	0.949	0.997	no	up	20.88	16.41	-0.35	0.512	0.994	no	down	20.88	28.14	0.43	0.53	0.729	no	up	hypothetical protein EURHEDRAFT_445465 [Aspergillus ruber CBS 135680]	_	Mediator of RNA polymerase II transcription subunit 10 (Mediator complex subunit 10); Compon [...]	MED10, NUT2
g1054	5.75	9.54	0.72	0.193	0.501	no	up	7.43	8	0.11	1	1	no	up	7.43	4.43	-0.73	0.233	0.825	no	down	7.43	9.94	0.42	0.555	0.748	no	up	hypothetical protein EURHEDRAFT_411294 [Aspergillus ruber CBS 135680]	_	Afu3g06860 (Alt. Locus), hypothetical protein	_
g1092	16.41	27	0.71	0.171	0.472	no	up	16.03	25.76	0.68	0.384	0.825	no	up	16.03	35.6	1.15	0.112	0.582	no	up	16.03	45.51	1.5	0.0256	0.0953	no	up	SET domain-containing protein [Aspergillus ruber CBS 135680]	_	Histone-lysine N-methyltransferase (Ash1), putative	ASH1L
g3522	137.63	225.81	0.71	0.172	0.472	no	up	81.82	168.02	1.04	0.159	0.58	no	up	81.82	139.56	0.77	0.306	0.908	no	up	81.82	196.29	1.26	0.0589	0.175	no	up	acetolactate synthase catalytic subunit [Aspergillus ruber CBS 135680]	_	Acetolactate synthase (EC 2.2.1.6)	E2.2.1.6L, ilvB, ilvG, ilvI
g832	101.88	167.01	0.71	0.172	0.473	no	up	159.65	105.64	-0.6	0.284	0.748	no	down	159.65	133.35	-0.26	0.584	1	no	down	159.65	164.4	0.04	0.959	0.985	no	up	peroxisomal NADP-dependent isocitrate dehydrogenase [Aspergillus ruber CBS 135680]	_	Afu3g08660 (Alt. Locus), isocitrate dehydrogenase Idp1, putative, similar to Mitochondrial N [...]	IDH1, IDH2, icd
g5397	19.36	31.79	0.71	0.173	0.474	no	up	29.83	35.16	0.24	0.846	0.982	no	up	29.83	38.59	0.37	0.678	1	no	up	29.83	60.24	1.01	0.129	0.301	no	up	hypothetical protein EURHEDRAFT_201059 [Aspergillus ruber CBS 135680]	_	Afu4g09120 (Alt. Locus), GTPase activating protein for Arf, putative	_
g3466	33.36	54.76	0.71	0.173	0.474	no	up	13.92	28.96	1.05	0.154	0.569	no	up	13.92	22.46	0.69	0.373	0.95	no	up	13.92	42.63	1.61	0.0172	0.071	no	up	hypothetical protein EURHEDRAFT_515796 [Aspergillus ruber CBS 135680]	_	RCC1 domain	_
g5201	474.71	777.09	0.71	0.173	0.474	no	up	272.33	463.38	0.77	0.317	0.776	no	up	272.33	265.63	-0.04	0.838	1	no	down	272.33	559.33	1.04	0.119	0.286	no	up	putative snRNP and snoRNP protein [Aspergillus ruber CBS 135680]	_	Afu2g05950 (Alt. Locus), snRNP and snoRNP protein (Snu13), putative, similar to part of smal [...]	SNU13, NHP2L
g4342	136.34	223.12	0.71	0.174	0.474	no	up	84.35	162.84	0.95	0.202	0.649	no	up	84.35	76.25	-0.15	0.71	1	no	down	84.35	154.35	0.87	0.19	0.393	no	up	hypothetical protein EURHEDRAFT_386395 [Aspergillus ruber CBS 135680]	_	FKBP-type peptidyl-prolyl isomerase, putative	FPR3_4
g7942	62.47	102.18	0.71	0.174	0.476	no	up	76.45	105.57	0.47	0.587	0.915	no	up	76.45	83.78	0.13	0.96	1	no	up	76.45	89.17	0.22	0.745	0.871	no	up	hypothetical protein EURHEDRAFT_414621 [Aspergillus ruber CBS 135680]	_	_	_
g3890	61.19	100.02	0.71	0.175	0.476	no	up	48.24	72.44	0.59	0.467	0.865	no	up	48.24	79.8	0.72	0.34	0.929	no	up	48.24	120.47	1.32	0.0486	0.153	no	up	hypothetical protein EURHEDRAFT_42997 [Aspergillus ruber CBS 135680]	_	_	_
g6161	25.52	41.79	0.71	0.175	0.477	no	up	19.31	24.74	0.36	0.708	0.951	no	up	19.31	28.97	0.58	0.463	0.981	no	up	19.31	43.3	1.16	0.0827	0.222	no	up	hypothetical protein EURHEDRAFT_374458 [Aspergillus ruber CBS 135680]	_	hypothetical protein	_
g1218	23.52	38.56	0.71	0.176	0.478	no	up	15.68	19.7	0.33	0.742	0.962	no	up	15.68	26.53	0.75	0.322	0.918	no	up	15.68	47.1	1.58	0.0194	0.0776	no	up	release factor [Aspergillus ruber CBS 135680]	_	Putative uncharacterized protein	prfA, MTRF1, MRF1
g2993	104.16	169.93	0.71	0.176	0.479	no	up	64.78	86.99	0.42	0.631	0.93	no	up	64.78	60.07	-0.11	0.753	1	no	down	64.78	132.54	1.03	0.122	0.29	no	up	isocitrate dehydrogenase LysB [Aspergillus ruber CBS 135680]	_	Homoisocitrate dehydrogenase, mitochondrial	LYS12
g1892	647.06	1055.26	0.71	0.176	0.479	no	up	432.15	705.64	0.71	0.363	0.808	no	up	432.15	749.82	0.79	0.29	0.895	no	up	432.15	893.67	1.05	0.116	0.281	no	up	hypothetical protein EURHEDRAFT_194568 [Aspergillus ruber CBS 135680]	_	Putative uncharacterized protein	_
g7599	89.56	146.07	0.71	0.176	0.479	no	up	58.99	63.44	0.1	0.996	1	no	up	58.99	83.54	0.5	0.54	1	no	up	58.99	158.69	1.43	0.0335	0.117	no	up	farnesyl-pyrophosphate synthetase [Aspergillus ruber CBS 135680]	_	Farnesyl-pyrophosphate synthetase	FDPS
g4362	15.35	25.19	0.71	0.177	0.48	no	up	18.43	17.28	-0.09	0.766	0.968	no	down	18.43	18.94	0.04	0.93	1	no	up	18.43	37.43	1.02	0.127	0.299	no	up	hypothetical protein EURHEDRAFT_415156 [Aspergillus ruber CBS 135680]	_	Dynactin subunit, putative	JNM1
g3073	27.66	45.26	0.71	0.177	0.48	no	up	22.05	43.38	0.97	0.193	0.637	no	up	22.05	30.67	0.47	0.572	1	no	up	22.05	35.04	0.67	0.321	0.545	no	up	hypothetical protein EURHEDRAFT_378220 [Aspergillus ruber CBS 135680]	_	_	_
g3806	3.72	6.16	0.71	0.177	0.481	no	up	5.91	6.39	0.11	1	1	no	up	5.91	3.6	-0.7	0.231	0.825	no	down	5.91	8.52	0.52	0.442	0.658	no	up	Pumilio-family RNA binding repeat protein [Aspergillus ruber CBS 135680]	_	Pumilio-family RNA binding repeat protein	_
g6256	9.84	16.12	0.71	0.178	0.481	no	up	11	16.42	0.57	0.481	0.875	no	up	11	12.89	0.23	0.85	1	no	up	11	27.52	1.32	0.0508	0.158	no	up	hypothetical protein EURHEDRAFT_414911 [Aspergillus ruber CBS 135680]	_	_	_
g1336	19.64	32.08	0.71	0.178	0.481	no	up	10.64	17.62	0.72	0.352	0.802	no	up	10.64	21.27	0.99	0.178	0.731	no	up	10.64	37.83	1.82	0.00745	0.0365	yes	up	hypothetical protein EURHEDRAFT_412806 [Aspergillus ruber CBS 135680]	_	Putative uncharacterized protein	_
g2766	22.94	37.51	0.71	0.181	0.486	no	up	26.16	36.99	0.5	0.557	0.906	no	up	26.16	23.25	-0.17	0.696	1	no	down	26.16	29.37	0.17	0.814	0.91	no	up	BCAS2 family protein [Aspergillus ruber CBS 135680]	_	BCAS2 domain protein	BCAS2
g5748	9.3	15.23	0.71	0.185	0.491	no	up	4.34	11.86	1.43	0.0559	0.332	no	up	4.34	8.71	0.99	0.194	0.759	no	up	4.34	17.12	1.96	0.00531	0.0275	yes	up	hypothetical protein EURHEDRAFT_411041 [Aspergillus ruber CBS 135680]	_	Afu2g16550 (Alt. Locus), conserved hypothetical protein	_
g6561	371.48	605.04	0.7	0.177	0.48	no	up	334.54	346.78	0.05	0.931	0.995	no	up	334.54	160.98	-1.05	0.0821	0.484	no	down	334.54	437.73	0.39	0.563	0.754	no	up	hypothetical protein EURHEDRAFT_400045 [Aspergillus ruber CBS 135680]	_	_	_
g4193	43.34	70.57	0.7	0.178	0.481	no	up	60.69	57.42	-0.08	0.774	0.97	no	down	60.69	65.56	0.11	0.985	1	no	up	60.69	96.96	0.68	0.31	0.534	no	up	DUF21-domain-containing protein [Aspergillus ruber CBS 135680]	_	DUF21 and CBS domain protein (Mam3), putative	CNNM
g1082	136.58	222.1	0.7	0.178	0.481	no	up	99.59	150.38	0.59	0.459	0.862	no	up	99.59	180.69	0.86	0.247	0.848	no	up	99.59	296.78	1.57	0.0192	0.0771	no	up	sulfate adenylyltransferase [Aspergillus ruber CBS 135680]	_	Sulfate adenylyltransferase (EC 2.7.7.4)(Sulfate adenylate transferase)(SAT)(ATP-sulfurylase [...]	sat, met3
g3737	15.12	24.63	0.7	0.18	0.484	no	up	8.22	16.55	1	0.176	0.614	no	up	8.22	17.77	1.1	0.129	0.627	no	up	8.22	26.61	1.68	0.0126	0.0553	no	up	hypothetical protein EURHEDRAFT_518155 [Aspergillus ruber CBS 135680]	_	Contig An16c0230, complete genome	_
g2679	15.92	25.92	0.7	0.18	0.484	no	up	34.61	26.44	-0.39	0.451	0.857	no	down	34.61	24.29	-0.51	0.355	0.936	no	down	34.61	43.65	0.33	0.62	0.794	no	up	hypothetical protein EURHEDRAFT_519168 [Aspergillus ruber CBS 135680]	_	Pc18g02140	_
g2839	20.31	32.99	0.7	0.18	0.484	no	up	15.54	20.3	0.38	0.675	0.943	no	up	15.54	28.36	0.86	0.244	0.843	no	up	15.54	42.38	1.44	0.0313	0.111	no	up	Pkinase-domain-containing protein [Aspergillus ruber CBS 135680]	_	Afu6g06720 (Alt. Locus), serine/threonine protein kinase, putative, (2.7.1.-)	E2.7.1.-
g2757	84.47	137.13	0.7	0.18	0.485	no	up	43.43	51.88	0.26	0.826	0.979	no	up	43.43	75.38	0.79	0.292	0.895	no	up	43.43	111.72	1.36	0.0426	0.139	no	up	carrier protein YMC1 [Aspergillus ruber CBS 135680]	_	Similarity to mitochondrial carrier protein Ymc1 - Saccharomyces cerevisiae	SLC25A20_29, CACT, CACL, CRC1
g5857	12.95	21.05	0.7	0.182	0.488	no	up	9	19.76	1.13	0.124	0.504	no	up	9	14.32	0.66	0.389	0.961	no	up	9	27.6	1.61	0.017	0.0702	no	up	P-loop containing nucleoside triphosphate hydrolase protein [Aspergillus ruber CBS 135680]	_	Putative uncharacterized protein	DDX51, DBP6
g6911	8.77	14.3	0.7	0.182	0.488	no	up	16.31	18.82	0.21	0.886	0.988	no	up	16.31	16.44	0.01	0.897	1	no	up	16.31	25.02	0.61	0.356	0.577	no	up	Zn(II)2Cys6 transcription factor [Aspergillus ruber CBS 135680]	_	Putative uncharacterized protein	_
g7943	2.58	4.25	0.7	0.182	0.489	no	up	3.16	2.54	-0.3	0.537	0.898	no	down	3.16	4.26	0.42	0.619	1	no	up	3.16	6.1	0.93	0.16	0.35	no	up	hypothetical protein EURHEDRAFT_442652, partial [Aspergillus ruber CBS 135680]	_	_	_
g7629	84.03	136.29	0.7	0.182	0.489	no	up	66.23	76.71	0.21	0.877	0.987	no	up	66.23	106.31	0.68	0.379	0.953	no	up	66.23	112.17	0.76	0.256	0.475	no	up	UPF0047-domain-containing protein [Aspergillus ruber CBS 135680]	_	Putative uncharacterized protein	_
g4431	42.47	68.82	0.7	0.184	0.491	no	up	31.05	38.36	0.3	0.768	0.968	no	up	31.05	52.97	0.77	0.311	0.91	no	up	31.05	75.57	1.28	0.0576	0.173	no	up	putative RWD domain protein [Aspergillus ruber CBS 135680]	_	RWD domain protein (Gir2), putative	_
g5604	10.86	17.68	0.7	0.184	0.491	no	up	10.42	15.45	0.56	0.49	0.877	no	up	10.42	15.85	0.6	0.448	0.975	no	up	10.42	17.28	0.72	0.279	0.499	no	up	hypothetical protein EURHEDRAFT_379974 [Aspergillus ruber CBS 135680]	_	_	_
g7045	7.04	11.46	0.7	0.184	0.491	no	up	12.58	9.39	-0.42	0.428	0.847	no	down	12.58	14.17	0.17	0.915	1	no	up	12.58	18.89	0.58	0.383	0.603	no	up	putative DEAD/DEAH box helicase [Aspergillus ruber CBS 135680]	_	DEAD/DEAH box helicase, putative	IRC3
g6937	44.49	72.35	0.7	0.189	0.496	no	up	105.98	61.26	-0.79	0.181	0.618	no	down	105.98	97.32	-0.12	0.741	1	no	down	105.98	136.74	0.37	0.589	0.773	no	up	hypothetical protein EURHEDRAFT_416912 [Aspergillus ruber CBS 135680]	_	_	_
g136	11.11	18.05	0.7	0.191	0.499	no	up	15.09	16.41	0.12	0.991	1	no	up	15.09	13.67	-0.14	0.72	1	no	down	15.09	21.15	0.48	0.482	0.691	no	up	hypothetical protein EURHEDRAFT_293808 [Aspergillus ruber CBS 135680]	_	_	_
g6115	6.52	10.66	0.7	0.202	0.513	no	up	10.18	7.5	-0.44	0.434	0.85	no	down	10.18	8.68	-0.23	0.642	1	no	down	10.18	12.9	0.34	0.63	0.801	no	up	putative RNA binding protein [Aspergillus ruber CBS 135680]	_	RNA binding protein, putative (AFU_orthologue; AFUA_5G09060)	PRPF38A
g5415	3.51	5.76	0.7	0.209	0.523	no	up	5.1	3.76	-0.43	0.457	0.862	no	down	5.1	5.75	0.17	0.939	1	no	up	5.1	8.08	0.65	0.355	0.577	no	up	ESCRT-2 complex [Aspergillus ruber CBS 135680]	_	Pc13g05910	SNF8, EAP30
g1215	15.9	25.8	0.69	0.181	0.485	no	up	11.72	24.68	1.07	0.146	0.553	no	up	11.72	19.02	0.69	0.364	0.943	no	up	11.72	33.05	1.49	0.0265	0.098	no	up	DNA repair protein Rad18 [Aspergillus ruber CBS 135680]	_	DNA repair protein Rad18, putative	_
g2220	63.64	102.98	0.69	0.182	0.488	no	up	47.09	71.4	0.6	0.455	0.861	no	up	47.09	49.71	0.08	0.976	1	no	up	47.09	92.2	0.97	0.147	0.33	no	up	37S ribosomal protein S9 [Aspergillus ruber CBS 135680]	_	37S ribosomal protein S9	RP-S9, MRPS9, rpsI
g3547	46.88	75.82	0.69	0.183	0.489	no	up	39.79	41.87	0.07	0.958	0.999	no	up	39.79	41.62	0.06	0.96	1	no	up	39.79	60.54	0.6	0.365	0.585	no	up	electron transfer flavo protein-ubiquinone oxidoreductase mitochondrial precursor [Aspergillus ruber CBS 135680]	_	Electron transfer flavoprotein-ubiquinone oxidoreductase, mitochondrial	ETFDH
g443	11.47	18.62	0.69	0.183	0.489	no	up	6.2	11.95	0.94	0.209	0.66	no	up	6.2	10.69	0.78	0.303	0.905	no	up	6.2	41.25	2.71	0.000103	0.000968	yes	up	hypothetical protein EURHEDRAFT_435299, partial [Aspergillus ruber CBS 135680]	_	_	_
g5426	7.08	11.49	0.69	0.183	0.49	no	up	8.39	14.85	0.82	0.281	0.743	no	up	8.39	8.34	-0.01	0.876	1	no	down	8.39	27.07	1.68	0.0128	0.0559	no	up	putative GPI-anchor [Aspergillus ruber CBS 135680]	_	GPI-anchor biosynthetic protein (Mcd4), putative	PIGN
g4390	131.35	211.71	0.69	0.184	0.491	no	up	241.75	158.4	-0.61	0.274	0.734	no	down	241.75	212.67	-0.18	0.665	1	no	down	241.75	241.03	0	0.984	0.998	no	down	hypothetical protein EURHEDRAFT_379885 [Aspergillus ruber CBS 135680]	_	Pc22g04470	_
g2004	23.49	38.02	0.69	0.184	0.491	no	up	18.71	26.09	0.48	0.576	0.913	no	up	18.71	30.64	0.71	0.356	0.936	no	up	18.71	30.7	0.71	0.289	0.512	no	up	Sm-like ribonucleo protein [Aspergillus ruber CBS 135680]	_	Putative uncharacterized protein	LSM8
g4884	1051.24	1693.11	0.69	0.184	0.491	no	up	967.87	962.33	-0.01	0.858	0.983	no	down	967.87	835.06	-0.21	0.634	1	no	down	967.87	1745.47	0.85	0.201	0.407	no	up	40S ribosomal protein S0 [Aspergillus ruber CBS 135680]	_	40S ribosomal protein S0 ; Required for the assembly and/or stability of the 40S ribosomal s [...]	RP-SAe, RPSA
g4295	43.31	69.87	0.69	0.185	0.492	no	up	64.77	55.35	-0.23	0.61	0.921	no	down	64.77	59.58	-0.12	0.739	1	no	down	64.77	87.11	0.43	0.524	0.725	no	up	hypothetical protein EURHEDRAFT_63644 [Aspergillus ruber CBS 135680]	_	Putative uncharacterized protein	_
g4762	21.56	34.82	0.69	0.185	0.492	no	up	31.04	31.61	0.03	0.901	0.988	no	up	31.04	30.75	-0.01	0.866	1	no	down	31.04	56.96	0.87	0.19	0.392	no	up	rhomboid protein 2 [Aspergillus ruber CBS 135680]	_	Pc22g01510	GAA1
g512	933.07	1501.27	0.69	0.185	0.492	no	up	280.37	549.93	0.97	0.19	0.633	no	up	280.37	852.69	1.6	0.0241	0.215	no	up	280.37	1828.37	2.7	0.000106	0.000993	yes	up	hypothetical protein EURHEDRAFT_409893 [Aspergillus ruber CBS 135680]	_	_	_
g7591	18.54	29.9	0.69	0.185	0.492	no	up	18.44	18.83	0.03	0.906	0.989	no	up	18.44	23.36	0.34	0.712	1	no	up	18.44	47.36	1.36	0.0425	0.138	no	up	putative GARP complex component [Aspergillus ruber CBS 135680]	_	Complex: S. cerevisiae Vps52p	VPS54
g4058	119.05	191.79	0.69	0.185	0.492	no	up	187.74	239.36	0.35	0.713	0.951	no	up	187.74	143.52	-0.39	0.459	0.981	no	down	187.74	291	0.63	0.343	0.565	no	up	hypothetical protein EURHEDRAFT_376519 [Aspergillus ruber CBS 135680]	_	translocon-associated protein, alpha subunit, putative (AFU_orthologue; AFUA_2G16120)	_
g3868	25.71	41.45	0.69	0.185	0.492	no	up	20.16	27.01	0.42	0.637	0.932	no	up	20.16	28.78	0.51	0.53	1	no	up	20.16	51.1	1.34	0.0458	0.147	no	up	hypothetical protein EURHEDRAFT_385860 [Aspergillus ruber CBS 135680]	_	_	_
g599	27.11	43.7	0.69	0.186	0.492	no	up	43.99	17.95	-1.29	0.036	0.253	no	down	43.99	48.36	0.14	0.955	1	no	up	43.99	47.35	0.11	0.883	0.948	no	up	beta-lactamase [Aspergillus ruber CBS 135680]	_	Beta-lactamase	_
g1918	139.99	225.25	0.69	0.186	0.492	no	up	110.64	130.94	0.24	0.839	0.982	no	up	110.64	152.39	0.46	0.58	1	no	up	110.64	167.11	0.59	0.373	0.592	no	up	putative NADH-ubiquinone oxidoreductase 19 kDa subunit [Aspergillus ruber CBS 135680]	_	NADH-ubiquinone oxidoreductase 19 kDa subunit, putative	NDUFA8
g6850	31.28	50.42	0.69	0.186	0.492	no	up	24.03	34.18	0.51	0.547	0.902	no	up	24.03	37.12	0.63	0.424	0.971	no	up	24.03	59.31	1.3	0.0525	0.162	no	up	hypothetical protein EURHEDRAFT_379145 [Aspergillus ruber CBS 135680]	_	Putative uncharacterized protein	_
g768	13.17	21.37	0.69	0.186	0.492	no	up	15.55	18.95	0.28	0.792	0.975	no	up	15.55	14.26	-0.12	0.744	1	no	down	15.55	23.83	0.61	0.363	0.584	no	up	putative alpha-1,3-mannosyltransferase [Aspergillus ruber CBS 135680]	_	Dolichyl-P-Man:Man(5)GlcNAc(2)-PP-dolichyl mannosyltransferase (EC 2.4.1.130)(Dol-P-Man-depe [...]	ALG3
g3527	21.72	35.1	0.69	0.187	0.493	no	up	15.72	43.41	1.46	0.0437	0.284	no	up	15.72	28.91	0.87	0.242	0.842	no	up	15.72	42.55	1.43	0.0339	0.118	no	up	hypothetical protein EURHEDRAFT_494709 [Aspergillus ruber CBS 135680]	_	Predicted protein	_
g2985	13.15	21.27	0.69	0.187	0.493	no	up	31.21	23.64	-0.4	0.439	0.853	no	down	31.21	19.12	-0.7	0.224	0.81	no	down	31.21	22.46	-0.47	0.463	0.678	no	down	hypothetical protein EURHEDRAFT_407652 [Aspergillus ruber CBS 135680]	_	Predicted transporter	_
g5471	51.27	82.66	0.69	0.187	0.493	no	up	41.87	56.41	0.43	0.629	0.93	no	up	41.87	67.81	0.69	0.369	0.948	no	up	41.87	78.63	0.91	0.176	0.373	no	up	esterase [Aspergillus ruber CBS 135680]	_	Pc13g06550	ACOT13
g982	26.81	43.2	0.69	0.189	0.496	no	up	32.72	37.49	0.2	0.895	0.988	no	up	32.72	48.15	0.56	0.49	0.988	no	up	32.72	21.07	-0.63	0.334	0.557	no	down	hypothetical protein [Penicillium rubens Wisconsin 54-1255]	_	_	_
g3865	7.6	12.31	0.69	0.196	0.505	no	up	5.99	10.47	0.8	0.309	0.77	no	up	5.99	6.32	0.08	0.987	1	no	up	5.99	8.12	0.43	0.535	0.733	no	up	conserved hypothetical protein [Aspergillus fumigatus A1163]	_	Putative uncharacterized protein	HPM1
g3567	8.21	13.32	0.69	0.196	0.505	no	up	4.78	9.29	0.94	0.224	0.68	no	up	4.78	6.59	0.46	0.617	1	no	up	4.78	18.28	1.91	0.00598	0.0303	yes	up	hypothetical protein EURHEDRAFT_528911 [Aspergillus ruber CBS 135680]	_	_	_
g7059	13.99	22.64	0.69	0.202	0.513	no	up	18.12	27.93	0.62	0.45	0.857	no	up	18.12	15.6	-0.21	0.653	1	no	down	18.12	15.31	-0.24	0.718	0.856	no	down	putative thiamine pyrophosphokinase [Aspergillus ruber CBS 135680]	_	_	thiN, TPK1, THI80
g5591	1262	2028.95	0.68	0.186	0.492	no	up	782.64	1288.38	0.72	0.353	0.802	no	up	782.64	768.58	-0.03	0.849	1	no	down	782.64	1560.76	1	0.135	0.311	no	up	ribosomal protein of the small subunit [Aspergillus ruber CBS 135680]	_	Ribosomal protein of the small subunit rps28-Aspergillus niger	RP-S23e, RPS23
g1992	48.26	77.56	0.68	0.187	0.493	no	up	34.44	43.26	0.33	0.738	0.96	no	up	34.44	44.3	0.36	0.687	1	no	up	34.44	76.63	1.15	0.0843	0.225	no	up	mitochondrial processing peptidase alpha subunit [Aspergillus ruber CBS 135680]	_	Mitochondrial processing peptidase alpha subunit, putative	PMPCA, MAS2
g3080	63.53	102	0.68	0.187	0.493	no	up	71.55	90.11	0.33	0.733	0.958	no	up	71.55	89.74	0.33	0.728	1	no	up	71.55	124.31	0.8	0.231	0.445	no	up	MAP kinase [Aspergillus ruber CBS 135680]	_	Afu1g05800 (Alt. Locus), MAP kinase kinase (Mkk2), putative, similar to MAP kinase kinase MK [...]	MKK1_2
g5855	109.05	175.37	0.68	0.187	0.493	no	up	101.46	18.64	-2.44	0.000266	0.00677	yes	down	101.46	32.87	-1.62	0.011	0.119	no	down	101.46	267.38	1.4	0.0374	0.126	no	up	hypothetical protein EURHEDRAFT_408024 [Aspergillus ruber CBS 135680]	_	Similarity to hypothetical protein Y2H9A.3 - Caenorhabditis elegans	_
g1801	9.01	14.53	0.68	0.187	0.493	no	up	5.57	12.54	1.16	0.111	0.482	no	up	5.57	7.08	0.34	0.71	1	no	up	5.57	16.58	1.56	0.0201	0.0797	no	up	Sfi1-domain-containing protein [Aspergillus ruber CBS 135680]	_	_	_
g4033	21.26	34.18	0.68	0.188	0.494	no	up	30.57	24.11	-0.34	0.493	0.879	no	down	30.57	22.19	-0.46	0.395	0.961	no	down	30.57	59.33	0.95	0.152	0.337	no	up	Het-C-domain-containing protein [Aspergillus ruber CBS 135680]	_	Afu2g15840 (Alt. Locus), HET-C domain protein HetC, identical to HET-C domain protein HetC ( [...]	_
g3225	20.81	33.48	0.68	0.188	0.494	no	up	22.35	25.68	0.2	0.894	0.988	no	up	22.35	30.92	0.47	0.577	1	no	up	22.35	50.2	1.16	0.0819	0.221	no	up	Pc16g09340 [Penicillium rubens Wisconsin 54-1255]	_	Pc16g09340	KARS, lysS
g4179	69.48	111.31	0.68	0.188	0.496	no	up	67.22	77.08	0.2	0.893	0.988	no	up	67.22	62.2	-0.11	0.748	1	no	down	67.22	128.68	0.94	0.159	0.349	no	up	putative RNA binding effector protein [Aspergillus ruber CBS 135680]	_	Vigilin	_
g2800	40.17	64.42	0.68	0.189	0.496	no	up	20.78	32.97	0.66	0.399	0.83	no	up	20.78	30.55	0.55	0.488	0.988	no	up	20.78	47.99	1.2	0.0715	0.201	no	up	KOW motif domain protein [Aspergillus ruber CBS 135680]	_	KOW motif domain protein	RP-L24, MRPL24, rplX
g3261	24.92	40.01	0.68	0.189	0.496	no	up	16.93	35.24	1.05	0.153	0.568	no	up	16.93	15.49	-0.13	0.734	1	no	down	16.93	25.56	0.59	0.376	0.596	no	up	guanine-N(7)--methyltransferase subunit trm82 [Aspergillus ruber CBS 135680]	_	Contig An01c0150, complete genome	TRM82, WDR4
g1405	36.55	58.68	0.68	0.189	0.496	no	up	27.22	76.14	1.48	0.0397	0.268	no	up	27.22	60.51	1.15	0.113	0.583	no	up	27.22	66.98	1.3	0.0532	0.163	no	up	hypothetical protein EURHEDRAFT_73056 [Aspergillus ruber CBS 135680]	_	Putative uncharacterized protein	_
g2901	23.38	37.53	0.68	0.189	0.496	no	up	20.73	34.51	0.73	0.343	0.796	no	up	20.73	28.21	0.44	0.6	1	no	up	20.73	39.02	0.91	0.172	0.368	no	up	hypothetical protein EURHEDRAFT_519678 [Aspergillus ruber CBS 135680]	_	Predicted protein	HOOK3
g5734	21.94	35.3	0.68	0.189	0.496	no	up	24.74	33.77	0.45	0.607	0.919	no	up	24.74	32.74	0.4	0.646	1	no	up	24.74	40.83	0.72	0.282	0.502	no	up	hypothetical protein EURHEDRAFT_411026 [Aspergillus ruber CBS 135680]	_	Pre-rRNA-processing protein esf2 (18S rRNA factor 2); Involved in the small subunit (SSU) pr [...]	ESF2, ABT1
g6849	1552.7	2481.5	0.68	0.19	0.497	no	up	1046.7	1336.49	0.35	0.709	0.951	no	up	1046.7	1005.75	-0.06	0.811	1	no	down	1046.7	2004.3	0.94	0.159	0.349	no	up	60S ribosomal protein L2 [Aspergillus ruber CBS 135680]	_	60S ribosomal protein L2	RP-L8e, RPL8
g397	26.75	42.95	0.68	0.19	0.497	no	up	24.15	46.39	0.94	0.209	0.66	no	up	24.15	21.14	-0.19	0.663	1	no	down	24.15	40.66	0.75	0.261	0.48	no	up	3' exoribonuclease family protein (Rrp42) [Aspergillus oryzae RIB40]	_	Predicted protein	RRP42, EXOSC7
g413	31.43	50.37	0.68	0.19	0.497	no	up	20.5	35.24	0.78	0.309	0.77	no	up	20.5	27.97	0.45	0.597	1	no	up	20.5	49.4	1.26	0.0589	0.175	no	up	phenylalanyl-tRNA synthetase alpha subunit [Aspergillus ruber CBS 135680]	_	Contig An02c0020, complete genome. (EC 6.1.1.20)	FARSA, pheS
g520	16.79	26.97	0.68	0.19	0.497	no	up	12.97	18.64	0.52	0.531	0.896	no	up	12.97	17.21	0.41	0.643	1	no	up	12.97	35.3	1.44	0.0324	0.114	no	up	Mob1/phocein [Aspergillus ruber CBS 135680]	_	Mob1 family protein	_
g2310	58.25	93.53	0.68	0.192	0.499	no	up	38.22	94.9	1.31	0.0738	0.387	no	up	38.22	84.43	1.14	0.12	0.601	no	up	38.22	132.38	1.79	0.00885	0.042	yes	up	PC4-domain-containing protein [Aspergillus ruber CBS 135680]	_	Pc13g05500	_
g5413	5.71	9.23	0.68	0.194	0.502	no	up	5.3	11.91	1.15	0.117	0.491	no	up	5.3	5.31	0	0.903	1	no	up	5.3	9.32	0.8	0.231	0.445	no	up	putative MFS transporter [Aspergillus ruber CBS 135680]	_	Pc16g02680	_
g6263	24.72	39.59	0.68	0.194	0.503	no	up	17.81	29.93	0.75	0.337	0.791	no	up	17.81	41.25	1.21	0.0968	0.532	no	up	17.81	47.78	1.42	0.0355	0.121	no	up	hypothetical protein EURHEDRAFT_505514 [Aspergillus ruber CBS 135680]	_	_	_
g4974	35.02	56.03	0.68	0.195	0.504	no	up	24.11	28.19	0.22	0.863	0.985	no	up	24.11	34.27	0.51	0.541	1	no	up	24.11	66.14	1.45	0.0316	0.112	no	up	Translin [Aspergillus ruber CBS 135680]	_	Afu3g12280 (Alt. Locus), recombination hotspot-binding protein (Translin), putative, similar [...]	_
g7230	5.71	9.19	0.68	0.198	0.508	no	up	3.81	0.75	-2.2	0.00126	0.0225	yes	down	3.81	4.88	0.35	0.713	1	no	up	3.81	31.51	3.02	2.3e-05	0.000261	yes	up	hypothetical protein EURHEDRAFT_486796 [Aspergillus ruber CBS 135680]	_	Putative uncharacterized protein	_
g2100	8.31	13.38	0.68	0.2	0.51	no	up	3.37	4.63	0.45	0.638	0.932	no	up	3.37	5.25	0.62	0.46	0.981	no	up	3.37	2.72	-0.3	0.665	0.821	no	down	hypothetical protein EURHEDRAFT_410583 [Aspergillus ruber CBS 135680]	_	_	_
g5530	5.67	9.12	0.68	0.264	0.599	no	up	2.1	5.96	1.46	0.113	0.484	no	up	2.1	5.95	1.46	0.115	0.587	no	up	2.1	9.34	2.1	0.0102	0.0472	yes	up	hypothetical protein EURHEDRAFT_415332 [Aspergillus ruber CBS 135680]	_	Putative uncharacterized protein;	_
g1373	125.67	200.5	0.67	0.192	0.499	no	up	106.9	151.95	0.51	0.543	0.901	no	up	106.9	120.1	0.17	0.916	1	no	up	106.9	187.88	0.81	0.221	0.432	no	up	bifunctional purine biosynthesis protein ADE16 [Aspergillus ruber CBS 135680]	_	Bifunctional purine biosynthesis protein ADE16	purH
g2406	59.97	95.68	0.67	0.192	0.499	no	up	137.84	52.02	-1.4	0.0234	0.191	no	down	137.84	133.9	-0.04	0.83	1	no	down	137.84	149.72	0.12	0.866	0.941	no	up	HET-s/LopB domain protein [Aspergillus ruber CBS 135680]	_	Putative uncharacterized protein	_
g4883	10.11	16.2	0.67	0.192	0.5	no	up	14.74	11.67	-0.33	0.503	0.886	no	down	14.74	13.62	-0.11	0.75	1	no	down	14.74	32.5	1.14	0.0891	0.235	no	up	hypothetical protein EURHEDRAFT_467661 [Aspergillus ruber CBS 135680]	_	Putative uncharacterized protein	_
g5717	67.08	107.15	0.67	0.192	0.5	no	up	47.01	56.7	0.27	0.809	0.975	no	up	47.01	52.92	0.17	0.914	1	no	up	47.01	92.96	0.98	0.141	0.321	no	up	CAF1 family ribonuclease [Aspergillus ruber CBS 135680]	_	Afu2g16970 (Alt. Locus), 50S ribosomal subunit L30	MRPL46
g8026	426.55	680.32	0.67	0.192	0.5	no	up	177.26	455.24	1.36	0.0599	0.346	no	up	177.26	200.99	0.18	0.901	1	no	up	177.26	619.26	1.8	0.00777	0.0376	yes	up	_	_	_	_
g7439	27.37	43.74	0.67	0.193	0.501	no	up	28.06	38.65	0.46	0.592	0.917	no	up	28.06	25.87	-0.12	0.744	1	no	down	28.06	36.88	0.39	0.559	0.75	no	up	rab geranylgeranyl transferase escort protein [Aspergillus ruber CBS 135680]	_	RAB proteins geranylgeranyltransferase component A	_
g3111	15.95	25.43	0.67	0.194	0.502	no	up	28.22	32.28	0.19	0.898	0.988	no	up	28.22	27.87	-0.02	0.86	1	no	down	28.22	38.46	0.45	0.505	0.711	no	up	ARM repeat-containing protein [Aspergillus ruber CBS 135680]	_	Putative uncharacterized protein	_
g4239	108.29	172.16	0.67	0.194	0.503	no	up	105.51	123.61	0.23	0.855	0.983	no	up	105.51	119.02	0.17	0.909	1	no	up	105.51	174.82	0.73	0.274	0.492	no	up	t-complex protein 1 subunit epsilon [Aspergillus ruber CBS 135680]	_	t-complex protein 1, epsilon subunit, putative (AFU_orthologue; AFUA_6G07540)	CCT5
g7482	290.71	461.85	0.67	0.195	0.503	no	up	122.23	104.95	-0.22	0.617	0.924	no	down	122.23	291.71	1.25	0.0812	0.481	no	up	122.23	341.86	1.48	0.0272	0.1	no	up	putative sorbitol/xylulose reductase [Aspergillus ruber CBS 135680]	_	Sorbitol/xylulose reductase, putative	E1.-.-.-
g332	55.63	88.32	0.67	0.195	0.504	no	up	40.53	51.7	0.35	0.712	0.951	no	up	40.53	45.5	0.17	0.917	1	no	up	40.53	79.05	0.96	0.148	0.331	no	up	hypothetical protein EURHEDRAFT_454708 [Aspergillus ruber CBS 135680]	_	Function: eIF-4F of S. cerevisiae is a 150K subunit of a mRNA cap-binding protein	EIF4G
g2312	22.15	35.2	0.67	0.197	0.506	no	up	17.94	30.36	0.76	0.327	0.785	no	up	17.94	35.76	0.99	0.177	0.728	no	up	17.94	33.44	0.89	0.181	0.38	no	up	hypothetical protein EURHEDRAFT_442511, partial [Aspergillus ruber CBS 135680]	_	_	_
g6706	18.41	29.25	0.67	0.197	0.506	no	up	34.4	27.56	-0.32	0.516	0.89	no	down	34.4	24.52	-0.49	0.374	0.95	no	down	34.4	50.13	0.54	0.417	0.636	no	up	Gpi16 subunit, GPI transamidase component [Aspergillus ruber CBS 135680]	_	GPI transamidase component Gpi16, putative	PIGT
g7442	25.48	40.51	0.67	0.198	0.506	no	up	15.42	28.76	0.89	0.234	0.691	no	up	15.42	20.59	0.41	0.634	1	no	up	15.42	32.66	1.08	0.108	0.269	no	up	exoribonuclease family protein [Aspergillus ruber CBS 135680]	_	Predicted protein	RRP43, EXOSC8, OIP2
g7816	52.6	83.54	0.67	0.198	0.506	no	up	32.46	63.62	0.97	0.194	0.638	no	up	32.46	34.23	0.08	0.978	1	no	up	32.46	60.87	0.9	0.176	0.375	no	up	hypothetical protein EURHEDRAFT_380692 [Aspergillus ruber CBS 135680]	_	Putative uncharacterized protein	BCP1, BCCIP
g920	3.67	5.89	0.67	0.199	0.509	no	up	5.78	7.67	0.4	0.656	0.937	no	up	5.78	5.27	-0.13	0.733	1	no	down	5.78	8.35	0.52	0.44	0.656	no	up	hypothetical protein EURHEDRAFT_470838 [Aspergillus ruber CBS 135680]	_	Putative uncharacterized protein	_
g17	3.56	5.71	0.67	0.215	0.533	no	up	4.77	2.46	-0.93	0.142	0.546	no	down	4.77	3.77	-0.33	0.532	1	no	down	4.77	5.05	0.08	0.916	0.966	no	up	RmlC-like cupin [Aspergillus ruber CBS 135680]	_	Predicted protein	_
g258	2.04	3.31	0.67	0.255	0.589	no	up	0.64	2.45	1.78	0.0324	0.237	no	up	0.64	11.68	3.99	9.11e-07	5.01e-05	yes	up	0.64	10.01	3.77	1.53e-06	2.33e-05	yes	up	short-chain dehydrogenase [Neosartorya fischeri NRRL 181]	_	Short-chain dehydrogenase	_
g533	1850.91	2932.24	0.66	0.196	0.506	no	up	1496.25	1818.21	0.28	0.792	0.975	no	up	1496.25	1280.44	-0.22	0.621	1	no	down	1496.25	2446.09	0.71	0.286	0.508	no	up	60S ribosomal protein L3 [Aspergillus ruber CBS 135680]	_	Transcriptional corepressor Cyc8, putative	RP-L3e, RPL3
g3912	143.03	226.83	0.66	0.196	0.506	no	up	248.91	183.39	-0.44	0.402	0.832	no	down	248.91	157.44	-0.66	0.249	0.848	no	down	248.91	229.36	-0.12	0.847	0.931	no	down	Pkinase-domain-containing protein [Aspergillus ruber CBS 135680]	_	Contig An16c0240, complete genome. (EC 2.7.1.-)	CSNK2A
g6423	769.04	1218.44	0.66	0.197	0.506	no	up	504.59	696.06	0.46	0.588	0.916	no	up	504.59	715.36	0.5	0.536	1	no	up	504.59	1278.64	1.34	0.045	0.145	no	up	nucleosome binding protein (Nhp6a), putative [Aspergillus clavatus NRRL 1]	_	Nucleosome binding protein (Nhp6a), putative	_
g6929	197.83	313.66	0.66	0.197	0.506	no	up	157.81	159.17	0.01	0.884	0.988	no	up	157.81	174.93	0.15	0.94	1	no	up	157.81	320.41	1.02	0.126	0.297	no	up	protein import receptor MAS20 [Aspergillus ruber CBS 135680]	_	Mitochondrial import receptor subunit (Tom20), putative	TOM20
g807	842.75	1334.95	0.66	0.197	0.506	no	up	1138.92	294.51	-1.95	0.00246	0.0377	yes	down	1138.92	1147.96	0.01	0.894	1	no	up	1138.92	1195.97	0.07	0.925	0.97	no	up	hypothetical protein EURHEDRAFT_408600 [Aspergillus ruber CBS 135680]	_	_	_
g1212	44.07	69.87	0.66	0.197	0.506	no	up	30.86	57.6	0.9	0.231	0.686	no	up	30.86	57.99	0.91	0.219	0.802	no	up	30.86	55.23	0.84	0.208	0.417	no	up	cystathionine gamma-synthase [Aspergillus ruber CBS 135680]	_	Cystathionine gamma-synthase	metB
g5486	25.43	40.21	0.66	0.199	0.509	no	up	27.44	41.8	0.61	0.449	0.857	no	up	27.44	31.4	0.19	0.885	1	no	up	27.44	59.48	1.11	0.0947	0.245	no	up	hypothetical protein EURHEDRAFT_462177 [Aspergillus ruber CBS 135680]	_	Flocculation suppression protein	_
g1960	12.13	19.25	0.66	0.199	0.51	no	up	10.4	14.37	0.46	0.59	0.916	no	up	10.4	13.82	0.41	0.64	1	no	up	10.4	25.22	1.27	0.0585	0.175	no	up	hypothetical protein EURHEDRAFT_455463, partial [Aspergillus ruber CBS 135680]	_	Arginine rich protein	_
g2567	36.25	57.3	0.66	0.2	0.51	no	up	51.57	63.54	0.3	0.77	0.968	no	up	51.57	87.46	0.76	0.313	0.911	no	up	51.57	89.88	0.8	0.229	0.442	no	up	putative vacuolar sorting protein [Aspergillus ruber CBS 135680]	_	Contig An02c0150, complete genome	_
g4740	75.91	120.15	0.66	0.2	0.51	no	up	35.72	86.06	1.27	0.0826	0.409	no	up	35.72	50.41	0.5	0.55	1	no	up	35.72	97.34	1.44	0.0325	0.114	no	up	50S ribosomal protein Mrp49 [Aspergillus ruber CBS 135680]	_	Afu6g12620 (Alt. Locus), 50S ribosomal protein Mrp49, similar to mitochondrial ribosomal pro [...]	MRP49
g4161	16.01	25.34	0.66	0.2	0.511	no	up	13.64	16.18	0.24	0.836	0.981	no	up	13.64	22.55	0.72	0.345	0.931	no	up	13.64	45.26	1.72	0.0108	0.0491	yes	up	hypothetical protein EURHEDRAFT_534029 [Aspergillus ruber CBS 135680]	_	_	_
g3817	47.68	75.52	0.66	0.2	0.511	no	up	48.67	78.5	0.69	0.381	0.823	no	up	48.67	81.66	0.75	0.327	0.92	no	up	48.67	69.59	0.51	0.444	0.66	no	up	hypothetical protein EURHEDRAFT_411626 [Aspergillus ruber CBS 135680]	_	_	_
g2632	6.48	10.33	0.66	0.201	0.513	no	up	16.55	6.4	-1.36	0.0286	0.217	no	down	16.55	15.71	-0.07	0.796	1	no	down	16.55	35.09	1.08	0.106	0.265	no	up	acyltransferase [Aspergillus ruber CBS 135680]	_	Contig An09c0060, complete genome	_
g3637	20.02	31.6	0.66	0.202	0.513	no	up	10.51	20.88	0.98	0.184	0.623	no	up	10.51	21.69	1.04	0.154	0.677	no	up	10.51	24.8	1.23	0.0656	0.189	no	up	hypothetical protein EURHEDRAFT_513186 [Aspergillus ruber CBS 135680]	_	37S ribosomal protein Rsm22	_
g6232	8.47	13.4	0.66	0.202	0.514	no	up	5.3	10.97	1.04	0.159	0.58	no	up	5.3	9.81	0.88	0.238	0.834	no	up	5.3	22.32	2.05	0.00258	0.0151	yes	up	hypothetical protein EURHEDRAFT_414882 [Aspergillus ruber CBS 135680]	_	Ulp1 protease family protein	_
g1016	16.37	25.95	0.66	0.204	0.516	no	up	10.19	17.73	0.79	0.306	0.766	no	up	10.19	15.78	0.63	0.43	0.972	no	up	10.19	28.68	1.48	0.0293	0.106	no	up	hypothetical protein EURHEDRAFT_411251 [Aspergillus ruber CBS 135680]	_	_	MAL2, MCM21
g2666	82.38	130.18	0.66	0.204	0.516	no	up	75.25	105.6	0.49	0.568	0.913	no	up	75.25	99.3	0.4	0.653	1	no	up	75.25	127.5	0.76	0.259	0.478	no	up	splicing factor 3B subunit 10 [Aspergillus ruber CBS 135680]	_	Putative uncharacterized protein	SF3B5, SF3B10
g6788	23.77	37.6	0.66	0.205	0.517	no	up	35.63	58.62	0.72	0.359	0.806	no	up	35.63	38.38	0.11	0.993	1	no	up	35.63	59.22	0.73	0.275	0.494	no	up	DUF396-domain-containing protein [Aspergillus ruber CBS 135680]	_	Putative uncharacterized protein	_
g1415	10.85	17.15	0.66	0.206	0.518	no	up	19.65	20.1	0.03	0.914	0.992	no	up	19.65	12.33	-0.67	0.248	0.848	no	down	19.65	18.37	-0.1	0.874	0.944	no	down	hypothetical protein EURHEDRAFT_515629 [Aspergillus ruber CBS 135680]	_	Afu4g07820 (Alt. Locus), methionyl-tRNA synthetase, putative, (6.1.1.10)	MARS, metG
g7547	241.27	379.7	0.65	0.202	0.513	no	up	247.62	288.22	0.22	0.867	0.986	no	up	247.62	186.14	-0.41	0.436	0.975	no	down	247.62	290.81	0.23	0.733	0.865	no	up	eukaryotic translation initiation factor 3 subunit D [Aspergillus ruber CBS 135680]	_	Eukaryotic translation initiation factor 3 subunit D (eIF3d); Component of the eukaryotic tr [...]	EIF3D
g195	19.88	31.32	0.65	0.202	0.513	no	up	16.76	19.93	0.25	0.83	0.98	no	up	16.76	22.88	0.45	0.594	1	no	up	16.76	47.84	1.51	0.0245	0.0922	no	up	protein kinase [Aspergillus ruber CBS 135680]	_	Dual specificity tyrosine-phosphorylation regulated kinase 2	DYRK2_3_4
g1746	21.26	33.5	0.65	0.202	0.513	no	up	10.5	27.74	1.39	0.053	0.32	no	up	10.5	29.61	1.49	0.0367	0.288	no	up	10.5	48.61	2.2	0.00131	0.00867	yes	up	hypothetical protein EURHEDRAFT_374182 [Aspergillus ruber CBS 135680]	_	Remark: Fission yeast cut17 is required for chromosome segregasion	_
g1349	34.81	54.84	0.65	0.202	0.514	no	up	34.62	43.87	0.34	0.724	0.955	no	up	34.62	51.89	0.58	0.461	0.981	no	up	34.62	55.44	0.68	0.309	0.533	no	up	hypothetical protein AOR_1_998074 [Aspergillus oryzae RIB40]	_	Predicted protein	_
g1660	33.59	52.82	0.65	0.203	0.514	no	up	34.66	45.73	0.4	0.658	0.937	no	up	34.66	45.12	0.38	0.668	1	no	up	34.66	61.64	0.83	0.212	0.422	no	up	hypothetical protein EURHEDRAFT_540724 [Aspergillus ruber CBS 135680]	_	Putative uncharacterized protein	_
g6125	101.17	159.05	0.65	0.203	0.514	no	up	222.8	186.36	-0.26	0.576	0.913	no	down	222.8	164.52	-0.44	0.414	0.968	no	down	222.8	252.08	0.18	0.796	0.9	no	up	Dolichyl-diphosphooligosaccharide-protein glycosyltransferase 48kDa subunit [Aspergillus ruber CBS 135680]	_	Afu5g08970 (Alt. Locus), oligosaccharyl transferase subunit (beta), putative	WBP1
g7740	40.88	64.37	0.65	0.203	0.515	no	up	28.46	52.17	0.87	0.249	0.708	no	up	28.46	35.09	0.3	0.761	1	no	up	28.46	59.84	1.07	0.11	0.271	no	up	hypothetical protein EURHEDRAFT_417545 [Aspergillus ruber CBS 135680]	_	Afu5g09670 (Alt. Locus), RNase III domain protein, contains an RNase III domain	MRPL15
g6818	10.8	17.01	0.65	0.204	0.515	no	up	9.48	17.38	0.87	0.248	0.707	no	up	9.48	14.84	0.64	0.407	0.964	no	up	9.48	23.79	1.32	0.0487	0.153	no	up	hypothetical protein EURHEDRAFT_516736 [Aspergillus ruber CBS 135680]	_	SET and WW domain protein	SETD2, SET2
g6539	103.25	162.11	0.65	0.204	0.515	no	up	93.82	95.87	0.03	0.906	0.989	no	up	93.82	121.63	0.37	0.674	1	no	up	93.82	147.16	0.65	0.33	0.553	no	up	methionine aminopeptidase [Aspergillus ruber CBS 135680]	_	Methionine aminopeptidase (EC 3.4.11.18); Removes the amino-terminal methionine from nascent [...]	map
g1806	27.06	42.54	0.65	0.204	0.516	no	up	60.5	124.53	1.04	0.158	0.578	no	up	60.5	11.9	-2.34	0.000413	0.00842	yes	down	60.5	1.77	-5.02	9.03e-11	3.11e-09	yes	down	hypothetical protein EURHEDRAFT_380139 [Aspergillus ruber CBS 135680]	_	Pc16g12190	_
g1224	3425.35	5367.71	0.65	0.205	0.516	no	up	2129.58	3667.16	0.78	0.304	0.765	no	up	2129.58	1985.01	-0.1	0.76	1	no	down	2129.58	4415.83	1.05	0.114	0.277	no	up	H2B_EMENI Histone H2B [Aspergillus nidulans FGSC A4]	_	Histone H2B (Eurofung); Core component of nucleosome. Nucleosomes wrap and compact DNA into [...]	H2B
g4629	48.91	76.74	0.65	0.205	0.516	no	up	53.76	44.77	-0.26	0.57	0.913	no	down	53.76	70.88	0.4	0.647	1	no	up	53.76	73.65	0.45	0.498	0.705	no	up	hypothetical protein EURHEDRAFT_451190 [Aspergillus ruber CBS 135680]	_	Predicted protein	_
g2037	22.46	35.26	0.65	0.205	0.517	no	up	21.64	41.49	0.94	0.209	0.66	no	up	21.64	35.38	0.71	0.354	0.936	no	up	21.64	53.84	1.31	0.05	0.156	no	up	GLE1-domain-containing protein [Aspergillus ruber CBS 135680]	_	Contig An08c0100, complete genome	GLE1
g5837	11.32	17.87	0.65	0.206	0.518	no	up	11.75	15.27	0.38	0.686	0.946	no	up	11.75	6.24	-0.9	0.135	0.644	no	down	11.75	13.23	0.17	0.813	0.91	no	up	S-adenosyl-L-methionine-dependent methyltransferase [Aspergillus ruber CBS 135680]	_	NOL1/NOP2/sun domain protein, putative	NSUN5, WBSCR20
g817	9.75	15.33	0.65	0.206	0.518	no	up	17.01	7.13	-1.24	0.0424	0.28	no	down	17.01	9.32	-0.86	0.146	0.666	no	down	17.01	21.5	0.34	0.617	0.792	no	up	hypothetical protein EURHEDRAFT_135195 [Aspergillus ruber CBS 135680]	_	Putative uncharacterized protein	_
g2261	13.28	20.9	0.65	0.207	0.521	no	up	16.29	19.63	0.27	0.808	0.975	no	up	16.29	13.82	-0.24	0.613	1	no	down	16.29	24.15	0.57	0.398	0.617	no	up	cytokinesis protein sepA [Aspergillus ruber CBS 135680]	_	Mitochondrial GTPase (Mss1), putative	mnmE, trmE, MSS1
g93	34.21	53.62	0.65	0.209	0.523	no	up	14.32	43.33	1.59	0.028	0.215	no	up	14.32	30.12	1.07	0.146	0.667	no	up	14.32	70.49	2.29	0.000948	0.00665	yes	up	membrane fusion mating protein FIG1 [Aspergillus ruber CBS 135680]	_	Putative uncharacterized protein	_
g2670	26.85	42.28	0.65	0.212	0.529	no	up	30.56	37.85	0.31	0.767	0.968	no	up	30.56	50.1	0.71	0.361	0.94	no	up	30.56	57.06	0.9	0.183	0.383	no	up	hypothetical protein EURHEDRAFT_467239 [Aspergillus ruber CBS 135680]	_	Similarity to hypothetical protein AAG17244.1 - Homo sapiens	_
g6573	5.41	8.52	0.65	0.217	0.536	no	up	9.15	6.39	-0.51	0.36	0.806	no	down	9.15	8.47	-0.11	0.757	1	no	down	9.15	15.94	0.79	0.238	0.453	no	up	hypothetical protein EURHEDRAFT_409133 [Aspergillus ruber CBS 135680]	_	_	_
g5231	0.53	0.89	0.65	0.239	0.569	no	up	1.28	0.93	-0.42	0.461	0.863	no	down	1.28	1.56	0.27	0.804	1	no	up	1.28	1	-0.33	0.618	0.792	no	down	hypothetical protein EURHEDRAFT_378890 [Aspergillus ruber CBS 135680]	_	_	_
g2823	2.66	4.22	0.65	0.275	0.61	no	up	1.47	3.16	1.05	0.232	0.688	no	up	1.47	1.01	-0.5	0.48	0.987	no	down	1.47	1.61	0.12	0.922	0.968	no	up	_	_	_	_
g2035	20.45	32.01	0.64	0.206	0.518	no	up	24.06	18.23	-0.4	0.438	0.853	no	down	24.06	24.67	0.04	0.925	1	no	up	24.06	76.44	1.66	0.0134	0.0582	no	up	hypothetical protein EURHEDRAFT_515247 [Aspergillus ruber CBS 135680]	_	Myosin class II heavy chain (MHC), putativeMyosin heavy chain-like protein, putative ;	_
g6288	102.3	159.81	0.64	0.208	0.522	no	up	68.33	97.04	0.51	0.546	0.902	no	up	68.33	95.07	0.48	0.565	1	no	up	68.33	160.63	1.23	0.0653	0.189	no	up	hypothetical protein EURHEDRAFT_483995 [Aspergillus ruber CBS 135680]	_	Putative uncharacterized protein	_
g1344	16.67	26.06	0.64	0.208	0.522	no	up	17.96	22.22	0.31	0.763	0.968	no	up	17.96	28.22	0.65	0.4	0.962	no	up	17.96	40.22	1.16	0.0819	0.221	no	up	hypothetical protein EURHEDRAFT_75374 [Aspergillus ruber CBS 135680]	_	_	_
g218	250.55	390.32	0.64	0.21	0.525	no	up	226.08	228.92	0.02	0.89	0.988	no	up	226.08	297.62	0.4	0.649	1	no	up	226.08	365.92	0.69	0.297	0.52	no	up	hypothetical protein EURHEDRAFT_409736 [Aspergillus ruber CBS 135680]	_	Contig An02c0170, complete genome. (EC 1.6.5.3)	NDUFA5
g6061	64.98	101.22	0.64	0.21	0.526	no	up	39.8	50.43	0.34	0.724	0.955	no	up	39.8	45.78	0.2	0.876	1	no	up	39.8	89.52	1.17	0.0804	0.218	no	up	mitochondrial ribosomal protein Dap3 [Aspergillus ruber CBS 135680]	_	Putative uncharacterized protein	DAP3, MRPS29
g6555	218.73	340.52	0.64	0.211	0.526	no	up	376.29	281.14	-0.42	0.42	0.842	no	down	376.29	487.11	0.37	0.676	1	no	up	376.29	620.98	0.72	0.277	0.497	no	up	unnamed protein product [Aspergillus niger]	_	Remark: alternate names for S. cerevisiae Isu2: Nua2	_
g5979	180.86	281.76	0.64	0.212	0.528	no	up	152.83	207.35	0.44	0.617	0.924	no	up	152.83	175.68	0.2	0.877	1	no	up	152.83	395.42	1.37	0.0414	0.136	no	up	hypothetical protein AOR_1_2046144 [Aspergillus oryzae RIB40]	_	_	_
g5617	34.41	53.72	0.64	0.212	0.529	no	up	22.14	26.28	0.25	0.837	0.982	no	up	22.14	21.52	-0.04	0.834	1	no	down	22.14	40.83	0.88	0.191	0.394	no	up	ankyrin repeat protein [Aspergillus ruber CBS 135680]	_	Contig An08c0050, complete genome	K06867
g3851	31.99	49.96	0.64	0.213	0.53	no	up	22.08	25.14	0.19	0.909	0.991	no	up	22.08	23.6	0.1	1	1	no	up	22.08	52.16	1.24	0.0666	0.191	no	up	hypothetical protein EURHEDRAFT_514845 [Aspergillus ruber CBS 135680]	_	_	_
g6230	18.95	29.6	0.64	0.215	0.533	no	up	9.52	24.14	1.33	0.0693	0.373	no	up	9.52	22.39	1.23	0.0956	0.53	no	up	9.52	50.09	2.38	0.000623	0.00464	yes	up	Rho GTPase Rho4 [Aspergillus ruber CBS 135680]	_	Rho GTPase Rho4, putative	_
g2133	3.88	6.09	0.64	0.216	0.534	no	up	4.79	5.98	0.31	0.757	0.965	no	up	4.79	2.45	-0.94	0.125	0.618	no	down	4.79	5.7	0.25	0.73	0.863	no	up	MFS general substrate transporter [Aspergillus ruber CBS 135680]	_	Pc21g05740	_
g2174	13.23	20.66	0.64	0.216	0.535	no	up	16.28	15.37	-0.08	0.782	0.973	no	down	16.28	16.53	0.02	0.912	1	no	up	16.28	23.2	0.51	0.451	0.666	no	up	hypothetical protein EURHEDRAFT_474999 [Aspergillus ruber CBS 135680]	_	Putative uncharacterized protein	ELP5, IKI1
g3170	5.79	9.06	0.64	0.217	0.536	no	up	10.84	13.6	0.32	0.741	0.962	no	up	10.84	14.01	0.37	0.683	1	no	up	10.84	12.94	0.25	0.71	0.85	no	up	hypothetical protein EURHEDRAFT_480498 [Aspergillus ruber CBS 135680]	_	Predicted protein	_
g4805	54.96	85.65	0.64	0.218	0.538	no	up	10.65	155.7	3.86	5.07e-07	4.9e-05	yes	up	10.65	16.02	0.58	0.506	0.992	no	up	10.65	37.49	1.81	0.0112	0.0504	no	up	_	_	_	_
g1669	20.34	31.74	0.64	0.223	0.546	no	up	6.88	24.78	1.83	0.0146	0.136	no	up	6.88	14.82	1.1	0.162	0.695	no	up	6.88	30.17	2.12	0.00309	0.0176	yes	up	hypothetical protein EURHEDRAFT_512320 [Aspergillus ruber CBS 135680]	_	Afu1g14590 (Alt. Locus), conserved hypothetical protein	CMC1
g7264	395.88	614.25	0.63	0.213	0.53	no	up	242.61	455.28	0.91	0.224	0.681	no	up	242.61	287.89	0.25	0.821	1	no	up	242.61	529	1.12	0.0917	0.24	no	up	ketol-acid reductoisomerase mitochondrial precursor [Aspergillus ruber CBS 135680]	_	Ketol-acid reductoisomerase, mitochondrial	ilvC
g4523	10.7	16.67	0.63	0.213	0.53	no	up	15.62	16.72	0.1	0.989	1	no	up	15.62	17.64	0.17	0.908	1	no	up	15.62	27.63	0.82	0.218	0.428	no	up	DUF1740-domain-containing protein [Aspergillus ruber CBS 135680]	_	Afu6g13360 (Alt. Locus), conserved hypothetical protein	_
g6210	64.05	99.52	0.63	0.213	0.53	no	up	22.96	77.62	1.75	0.0145	0.135	no	up	22.96	49.68	1.11	0.127	0.624	no	up	22.96	104.21	2.18	0.00151	0.00978	yes	up	putative mitochondrial import inner membrane translocase subunit TIM23 [Aspergillus ruber CBS 135680]	_	Putative uncharacterized protein	TIM23
g7838	111.06	172.11	0.63	0.215	0.533	no	up	76.14	99.97	0.39	0.667	0.942	no	up	76.14	80.97	0.09	0.989	1	no	up	76.14	139.1	0.87	0.193	0.396	no	up	50S ribosomal protein L4 [Aspergillus ruber CBS 135680]	_	50S ribosomal protein L4	RP-L4, MRPL4, rplD
g4688	197.09	305.07	0.63	0.215	0.534	no	up	80.38	178.05	1.15	0.117	0.49	no	up	80.38	89.1	0.15	0.94	1	no	up	80.38	182.53	1.18	0.0769	0.211	no	up	Gar1-domain-containing protein [Aspergillus ruber CBS 135680]	_	H/ACA ribonucleoprotein complex subunit 1 (snoRNP protein GAR1); Required for ribosome bioge [...]	GAR1, NOLA1
g5533	88.99	137.98	0.63	0.215	0.534	no	up	78.88	108.15	0.45	0.601	0.918	no	up	78.88	71.33	-0.14	0.714	1	no	down	78.88	86.39	0.13	0.853	0.934	no	up	guanylate kinase [Aspergillus ruber CBS 135680]	_	Guanylate kinase	E2.7.4.8, gmk
g622	49.82	77.13	0.63	0.215	0.534	no	up	29.89	47.91	0.68	0.386	0.825	no	up	29.89	38.15	0.35	0.7	1	no	up	29.89	70.25	1.23	0.0656	0.189	no	up	CTP synthase, putative [Neosartorya fischeri NRRL 181]	_	CTP synthase, putative	pyrG, CTPS
g2973	94.86	146.88	0.63	0.215	0.534	no	up	46.47	90.79	0.96	0.196	0.641	no	up	46.47	60.32	0.38	0.674	1	no	up	46.47	131.83	1.5	0.0256	0.0953	no	up	conserved hypothetical protein [Aspergillus terreus NIH2624]	_	Putative uncharacterized protein	SOD2
g6354	42.39	65.85	0.63	0.216	0.535	no	up	16.2	41.6	1.36	0.0628	0.354	no	up	16.2	35.7	1.14	0.121	0.604	no	up	16.2	39.37	1.28	0.0585	0.175	no	up	THUMP domain protein [Aspergillus ruber CBS 135680]	_	THUMP domain protein	TAN1, THUMPD1
g255	19.26	29.85	0.63	0.216	0.535	no	up	35.49	28.72	-0.3	0.529	0.896	no	down	35.49	26.29	-0.43	0.42	0.969	no	down	35.49	49.94	0.49	0.461	0.675	no	up	phospholipase D/nuclease [Aspergillus ruber CBS 135680]	_	Alpha-1,2 glucosyltransferase alg10 (EC 2.4.1.-)(Alpha-2-glucosyltransferase alg10)(Dolichyl [...]	ALG10
g1588	111.85	172.76	0.63	0.217	0.536	no	up	76.67	98.56	0.36	0.699	0.949	no	up	76.67	136.77	0.83	0.263	0.865	no	up	76.67	166.46	1.12	0.0937	0.244	no	up	phosphatidylserine decarboxylase proenzyme 1 mitochondrial precursor [Aspergillus ruber CBS 135680]	_	Phosphatidylserine decarboxylase proenzyme 1, mitochondrial	psd, PISD
g2911	23.07	35.81	0.63	0.217	0.536	no	up	13.05	30.82	1.23	0.0924	0.437	no	up	13.05	16.13	0.3	0.764	1	no	up	13.05	29.85	1.19	0.0778	0.213	no	up	hypothetical protein EURHEDRAFT_407570 [Aspergillus ruber CBS 135680]	_	Putative uncharacterized protein	_
g1233	67.2	103.75	0.63	0.217	0.536	no	up	137.25	69.83	-0.97	0.101	0.458	no	down	137.25	68.36	-1	0.0953	0.529	no	down	137.25	131.94	-0.06	0.92	0.967	no	down	Het-C-domain-containing protein [Aspergillus ruber CBS 135680]	_	NIMA-interacting protein TinC	_
g5644	55.45	85.71	0.63	0.218	0.537	no	up	71.19	40.07	-0.83	0.157	0.575	no	down	71.19	76.03	0.09	0.997	1	no	up	71.19	89.32	0.33	0.628	0.8	no	up	ribose 5-phosphate isomerase A [Aspergillus ruber CBS 135680]	_	Ribose 5-phosphate isomerase A	rpiA
g4765	20.61	31.85	0.63	0.221	0.543	no	up	22.12	21.54	-0.04	0.83	0.98	no	down	22.12	24.65	0.16	0.933	1	no	up	22.12	32.2	0.54	0.422	0.641	no	up	putative uroporphyrinogen-III synthase [Aspergillus ruber CBS 135680]	_	_	hemD, UROS
g3454	4.18	6.52	0.63	0.223	0.546	no	up	4.19	4.48	0.09	1	1	no	up	4.19	6.86	0.7	0.364	0.943	no	up	4.19	9.92	1.22	0.0687	0.196	no	up	putative C6 finger domain protein [Aspergillus ruber CBS 135680]	_	C6 finger domain protein, putative	_
g2135	0.34	0.58	0.63	0.343	0.679	no	up	0.2	0.28	0	1	1	no	no change	0.2	2.38	3.05	7.09e-05	0.002	yes	up	0.2	0.87	1.69	0.0236	0.09	no	up	Pc22g09560 [Penicillium rubens Wisconsin 54-1255]	_	Pc22g09560	cfa
g958	0.39	0.66	0.63	0.367	0.7	no	up	0.04	0.32	0	1	1	no	no change	0.04	0.41	0	1	1	no	no change	0.04	0.45	0	1	1	no	no change	UDP-glucose 4-epimerase [Aspergillus ruber CBS 135680]	_	UDP-glucose 4-epimerase	galE, GALE
g930	86.71	133.71	0.62	0.218	0.537	no	up	101.9	67.44	-0.59	0.284	0.748	no	down	101.9	87.57	-0.22	0.628	1	no	down	101.9	115.16	0.18	0.798	0.902	no	up	PX domain protein [Aspergillus ruber CBS 135680]	_	PX domain protein	_
g4243	13.58	20.97	0.62	0.22	0.542	no	up	14.05	21.86	0.63	0.425	0.844	no	up	14.05	17.08	0.28	0.782	1	no	up	14.05	37.44	1.41	0.0357	0.122	no	up	hypothetical protein EURHEDRAFT_515474 [Aspergillus ruber CBS 135680]	_	Essential cytoplasmic protein Ctr86, putative	_
g896	53.98	83.15	0.62	0.221	0.542	no	up	36.27	55.33	0.61	0.451	0.857	no	up	36.27	37.85	0.06	0.957	1	no	up	36.27	83.09	1.19	0.0748	0.207	no	up	hypothetical protein EURHEDRAFT_408477 [Aspergillus ruber CBS 135680]	_	Aconitate hydratase, putative	_
g5187	9.01	13.92	0.62	0.221	0.544	no	up	7.85	11.06	0.49	0.56	0.907	no	up	7.85	10.36	0.4	0.65	1	no	up	7.85	18.68	1.24	0.0633	0.184	no	up	hypothetical protein EURHEDRAFT_387544 [Aspergillus ruber CBS 135680]	_	Function: the N. crassa homolog CIA84 is a nuclear encoded	_
g6032	46.53	71.45	0.62	0.223	0.546	no	up	115.88	71	-0.71	0.216	0.667	no	down	115.88	86.31	-0.42	0.425	0.971	no	down	115.88	134.46	0.21	0.754	0.877	no	up	Pex24p-domain-containing protein [Aspergillus ruber CBS 135680]	_	Predicted protein	_
g3893	67.64	103.78	0.62	0.225	0.549	no	up	33.67	59.76	0.83	0.28	0.741	no	up	33.67	82.33	1.29	0.0748	0.457	no	up	33.67	96.22	1.51	0.0252	0.0942	no	up	Co-chaperone Hsc20 [Aspergillus ruber CBS 135680]	_	DnaJ domain protein	hscB, HSCB, HSC20
g6639	14.02	21.54	0.62	0.225	0.549	no	up	17.15	19.07	0.15	0.951	0.997	no	up	17.15	12.68	-0.43	0.42	0.969	no	down	17.15	25.86	0.59	0.377	0.598	no	up	hypothetical protein EURHEDRAFT_517887 [Aspergillus ruber CBS 135680]	_	C6 transcription factor, putative	_
g4527	15.86	24.36	0.62	0.226	0.55	no	up	7.78	19.43	1.31	0.0717	0.38	no	up	7.78	48.17	2.61	0.000284	0.00619	yes	up	7.78	9.27	0.25	0.718	0.856	no	up	hypothetical protein EURHEDRAFT_375700 [Aspergillus ruber CBS 135680]	_	_	_
g6779	98.13	150.46	0.62	0.226	0.551	no	up	97.88	115.85	0.24	0.843	0.982	no	up	97.88	82.86	-0.24	0.611	1	no	down	97.88	111.87	0.19	0.781	0.891	no	up	Trm112p-domain-containing protein [Aspergillus ruber CBS 135680]	_	DUF343 domain protein	TRM112, TRMT112
g4403	13.2	20.39	0.62	0.227	0.552	no	up	8.19	16.53	1	0.182	0.62	no	up	8.19	13.7	0.74	0.341	0.93	no	up	8.19	22.99	1.48	0.03	0.107	no	up	GINS complex, Psf1 component [Aspergillus ruber CBS 135680]	_	Pc22g05470	GINS1, PSF1
g1172	18.66	28.64	0.62	0.228	0.553	no	up	10.32	22.93	1.14	0.12	0.497	no	up	10.32	14.52	0.49	0.559	1	no	up	10.32	24.04	1.21	0.0722	0.203	no	up	hypothetical protein EURHEDRAFT_411422 [Aspergillus ruber CBS 135680]	_	Exosome complex exonuclease Rrp4, putative	RRP4, EXOSC2
g1339	24.79	38.08	0.62	0.233	0.56	no	up	6.94	20.37	1.54	0.0412	0.275	no	up	6.94	15.4	1.14	0.14	0.652	no	up	6.94	23.56	1.75	0.0137	0.059	no	up	hypothetical protein EURHEDRAFT_456919 [Aspergillus ruber CBS 135680]	_	Pc21g12130	PET117
g2145	11.44	17.58	0.62	0.234	0.561	no	up	6.7	12.08	0.84	0.277	0.739	no	up	6.7	12.65	0.91	0.227	0.817	no	up	6.7	9.61	0.51	0.462	0.677	no	up	hypothetical protein EURHEDRAFT_410521 [Aspergillus ruber CBS 135680]	_	_	_
g2	0.42	0.7	0.62	0.395	0.722	no	up	0	0	0	1	1	no	no change	0	0.25	0	1	1	no	no change	0	1.36	3.87	4.53e-05	0.000471	yes	up	putative naringenin,2-oxoglutarate 3-dioxygenase [Aspergillus ruber CBS 135680]	_	Naringenin,2-oxoglutarate 3-dioxygenase, putative	_
g4400	1506.88	2304.53	0.61	0.224	0.548	no	up	1670.74	1345.29	-0.31	0.52	0.891	no	down	1670.74	1144.41	-0.55	0.326	0.92	no	down	1670.74	1185.22	-0.5	0.442	0.658	no	down	hypothetical protein EURHEDRAFT_176944 [Aspergillus ruber CBS 135680]	_	BZIP transcription factor CpcA	_
g1210	23.69	36.29	0.61	0.224	0.549	no	up	32.07	53.85	0.75	0.331	0.787	no	up	32.07	29.3	-0.13	0.728	1	no	down	32.07	57.49	0.84	0.206	0.414	no	up	hypothetical protein EURHEDRAFT_453795 [Aspergillus ruber CBS 135680]	_	Putative uncharacterized protein	POM152
g6383	3899.61	5960.93	0.61	0.224	0.549	no	up	2207.72	3147.15	0.51	0.539	0.9	no	up	2207.72	2676.62	0.28	0.784	1	no	up	2207.72	4969.26	1.17	0.0792	0.216	no	up	ubiquitin-domain-containing protein [Aspergillus ruber CBS 135680]	_	Ubiquitin	RP-S27Ae, RPS27A
g5161	132.82	202.87	0.61	0.226	0.551	no	up	268.26	234.15	-0.2	0.641	0.932	no	down	268.26	175.94	-0.61	0.282	0.887	no	down	268.26	228.82	-0.23	0.716	0.854	no	down	oligosaccharyl transferase subunit [Aspergillus ruber CBS 135680]	_	Oligosaccharyltransferase	OST3, OST6
g402	131.8	201.26	0.61	0.226	0.551	no	up	38.43	99.26	1.37	0.0585	0.341	no	up	38.43	99.98	1.38	0.0545	0.374	no	up	38.43	155.71	2.02	0.0031	0.0177	yes	up	GrpE-domain-containing protein [Aspergillus ruber CBS 135680]	_	Afu2g13040 (Alt. Locus), mitochondrial co-chaperone GrpE, putative; Essential component of t [...]	GRPE
g8119	92.6	141.57	0.61	0.226	0.551	no	up	42.41	67.14	0.66	0.403	0.832	no	up	42.41	121.1	1.51	0.0347	0.279	no	up	42.41	126.77	1.58	0.0194	0.0779	no	up	DUF866 domain protein [Aspergillus ruber CBS 135680]	_	DUF866 domain protein	_
g3978	92.39	141.06	0.61	0.227	0.552	no	up	84.93	76.31	-0.15	0.689	0.946	no	down	84.93	90.11	0.09	0.985	1	no	up	84.93	172.79	1.02	0.125	0.295	no	up	hypothetical protein EURHEDRAFT_417272 [Aspergillus ruber CBS 135680]	_	conserved hypothetical protein	_
g181	98.47	150.13	0.61	0.227	0.552	no	up	95.73	107.33	0.16	0.932	0.996	no	up	95.73	116.02	0.28	0.785	1	no	up	95.73	143.11	0.58	0.384	0.604	no	up	mitochondrial precursor proteins import receptor [Aspergillus ruber CBS 135680]	_	Translocase of outer mitochondrial membrane complex	TOM70
g5154	94.38	143.84	0.61	0.227	0.553	no	up	115.19	139.07	0.27	0.804	0.975	no	up	115.19	116.46	0.02	0.9	1	no	up	115.19	140.41	0.29	0.672	0.825	no	up	hypothetical protein EURHEDRAFT_403881 [Aspergillus ruber CBS 135680]	_	Vacuolar sorting protein VPS1	DNM1L
g7739	40.36	61.46	0.61	0.229	0.555	no	up	22.5	28	0.31	0.754	0.965	no	up	22.5	34.61	0.62	0.427	0.971	no	up	22.5	97.55	2.11	0.00198	0.0122	yes	up	Sodium/hydrogen exchanger [Aspergillus ruber CBS 135680]	_	CPA2 familytransporter, putative	_
g4269	15.46	23.6	0.61	0.229	0.555	no	up	16.07	18.01	0.16	0.933	0.996	no	up	16.07	18.75	0.22	0.851	1	no	up	16.07	20.31	0.34	0.619	0.793	no	up	Smr domain protein [Aspergillus ruber CBS 135680]	_	Putative uncharacterized protein	_
g7823	23.16	35.47	0.61	0.23	0.558	no	up	9.52	38.28	2	0.00574	0.0688	no	up	9.52	25.13	1.39	0.0553	0.378	no	up	9.52	41.27	2.1	0.00229	0.0138	yes	up	hypothetical protein EURHEDRAFT_416041 [Aspergillus ruber CBS 135680]	_	conserved hypothetical protein	_
g208	75.27	114.74	0.61	0.231	0.558	no	up	48.21	86.38	0.84	0.27	0.73	no	up	48.21	57.31	0.25	0.824	1	no	up	48.21	122.92	1.35	0.0452	0.145	no	up	ribosomal protein L13 [Aspergillus ruber CBS 135680]	_	50S ribosomal protein L13	RP-L13, MRPL13, rplM
g1360	27.61	42.06	0.61	0.232	0.559	no	up	23.45	38.39	0.71	0.363	0.808	no	up	23.45	23.57	0.01	0.894	1	no	up	23.45	45.41	0.95	0.155	0.342	no	up	hypothetical protein EURHEDRAFT_377919 [Aspergillus ruber CBS 135680]	_	Putative uncharacterized protein	RRP7
g3539	5.56	8.52	0.61	0.233	0.56	no	up	3.31	7.4	1.14	0.119	0.494	no	up	3.31	7.44	1.14	0.114	0.587	no	up	3.31	15.11	2.16	0.00158	0.0101	yes	up	hypothetical protein EURHEDRAFT_513286 [Aspergillus ruber CBS 135680]	_	Putative uncharacterized protein	_
g7516	16.57	25.26	0.61	0.233	0.56	no	up	13.13	23.53	0.84	0.272	0.732	no	up	13.13	19.24	0.55	0.501	0.991	no	up	13.13	35.37	1.42	0.0353	0.121	no	up	mitochondrial thiamine pyrophosphate carrier 1 [Aspergillus ruber CBS 135680]	_	Mitochondrial thiamine pyrophosphate carrier 1 ; Mitochondrial transporter that mediates upt [...]	SLC25A19, DNC, TPC1
g7147	5.48	8.42	0.61	0.236	0.564	no	up	5.28	10.52	0.98	0.191	0.635	no	up	5.28	9.28	0.8	0.291	0.895	no	up	5.28	15.5	1.54	0.0238	0.0903	no	up	putative MFS monocarboxylate transporter [Aspergillus ruber CBS 135680]	_	Monocarboxylate transporter	_
g1739	0.24	0.42	0.61	0.24	0.57	no	up	15.29	1.4	-3.36	1.51e-06	0.000114	yes	down	15.29	1.18	-3.59	4.01e-07	2.5e-05	yes	down	15.29	4.49	-1.75	0.00915	0.0432	yes	down	putative beta-galactosidase A [Aspergillus ruber CBS 135680]	_	Beta-galactosidase (EC 3.2.1.23)	_
g3950	1.3	2.03	0.61	0.253	0.586	no	up	1.38	0.7	-0.89	0.148	0.557	no	down	1.38	1.81	0.37	0.685	1	no	up	1.38	3.65	1.34	0.0461	0.147	no	up	hypothetical protein MPH_00081 [Macrophomina phaseolina MS6]	_	_	_
g6870	65.75	100.03	0.6	0.231	0.558	no	up	28.91	79.68	1.46	0.0436	0.284	no	up	28.91	19.48	-0.57	0.319	0.916	no	down	28.91	23.72	-0.28	0.658	0.818	no	down	hypothetical protein EURHEDRAFT_434047, partial [Aspergillus ruber CBS 135680]	_	_	_
g7785	80.14	121.91	0.6	0.231	0.559	no	up	28.11	72.62	1.37	0.0608	0.348	no	up	28.11	58.8	1.06	0.15	0.671	no	up	28.11	111.18	1.98	0.00386	0.0213	yes	up	ferredoxin [Aspergillus ruber CBS 135680]	_	Putative uncharacterized protein	_
g1228	13.17	20.08	0.6	0.231	0.559	no	up	13.63	18.83	0.46	0.589	0.916	no	up	13.63	19.16	0.49	0.554	1	no	up	13.63	19.67	0.53	0.432	0.65	no	up	YccV-like-domain-containing protein [Aspergillus ruber CBS 135680]	_	Predicted protein	FBXO21
g2464	20.79	31.67	0.6	0.232	0.559	no	up	17.92	38.07	1.08	0.141	0.544	no	up	17.92	32.56	0.86	0.25	0.848	no	up	17.92	34.48	0.94	0.16	0.35	no	up	putative F-box protein [Aspergillus ruber CBS 135680]	_	F-box protein (Pof7), putative	FBXO9
g2172	27.04	41.12	0.6	0.232	0.56	no	up	25.78	22.78	-0.18	0.668	0.942	no	down	25.78	42.35	0.71	0.35	0.933	no	up	25.78	49.58	0.94	0.159	0.349	no	up	fad NAD binding oxidoreductase [Aspergillus ruber CBS 135680]	_	Fad NAD binding oxidoreductase, putative	_
g1661	6.31	9.59	0.6	0.233	0.56	no	up	2.83	5.83	1.02	0.161	0.583	no	up	2.83	5.59	0.96	0.185	0.742	no	up	2.83	8.14	1.49	0.0244	0.0922	no	up	FAD/NAD(P)-binding domain-containing protein [Aspergillus ruber CBS 135680]	_	NADH-dehydrogenase	ndh
g1041	55.42	83.96	0.6	0.233	0.56	no	up	31.09	21.51	-0.53	0.332	0.787	no	down	31.09	31.38	0.01	0.898	1	no	up	31.09	88.98	1.51	0.0241	0.0913	no	up	septin [Aspergillus ruber CBS 135680]	_	Afu3g07015 (Alt. Locus), septin	_
g1217	48.9	74.22	0.6	0.233	0.56	no	up	18.91	54.92	1.53	0.0339	0.244	no	up	18.91	47.86	1.34	0.0646	0.417	no	up	18.91	59.48	1.65	0.0151	0.0641	no	up	putative mitochondrial tricarboxylate transporter [Aspergillus ruber CBS 135680]	_	Mitochondrial tricarboxylate transporter (Ctp), putative	SLC25A1, CTP
g5728	105.12	159.09	0.6	0.233	0.56	no	up	79.5	104.31	0.39	0.666	0.941	no	up	79.5	86.43	0.12	0.973	1	no	up	79.5	127.51	0.68	0.306	0.529	no	up	curved DNA-binding protein, partial [Aspergillus ruber CBS 135680]	_	Contig An04c0300, complete genome	map
g2862	123.34	187.07	0.6	0.234	0.561	no	up	74.57	136.31	0.87	0.251	0.708	no	up	74.57	154.72	1.05	0.151	0.672	no	up	74.57	177.88	1.25	0.0622	0.182	no	up	G10 protein [Aspergillus ruber CBS 135680]	_	Similarity to protein G10 - Xenopus laevis	BUD31, G10
g2452	23.49	35.65	0.6	0.234	0.562	no	up	18.27	35.9	0.97	0.192	0.636	no	up	18.27	30.64	0.74	0.329	0.921	no	up	18.27	30.94	0.76	0.257	0.476	no	up	putative thiamine biosynthetic bifunctional enzyme [Aspergillus ruber CBS 135680]	_	Thiamine biosynthetic bifunctional enzyme, putative	THI6
g2987	27.97	42.37	0.6	0.235	0.563	no	up	32.06	30.6	-0.07	0.79	0.975	no	down	32.06	38.07	0.25	0.822	1	no	up	32.06	40.79	0.35	0.608	0.786	no	up	putative kynurenine 3-monooxygenase [Aspergillus ruber CBS 135680]	_	Kynurenine 3-monooxygenase (EC 1.14.13.9)(Kynurenine 3-hydroxylase)(Biosynthesis of nicotini [...]	KMO
g6079	57.78	87.4	0.6	0.235	0.563	no	up	31.49	33.42	0.09	0.972	1	no	up	31.49	62.89	1	0.175	0.723	no	up	31.49	102.36	1.7	0.0121	0.0536	no	up	putative F1F0 ATP synthase assembly protein Atp11 [Aspergillus ruber CBS 135680]	_	F1F0 ATP synthase assembly protein Atp11, putative	ATPeAF1, ATPAF1, ATP11
g5409	84.53	127.78	0.6	0.235	0.564	no	up	81.98	95.27	0.22	0.87	0.986	no	up	81.98	76.59	-0.1	0.765	1	no	down	81.98	107.76	0.39	0.557	0.749	no	up	putative 60S ribosomal protein L25 [Aspergillus ruber CBS 135680]	_	Afu4g09000 (Alt. Locus), 60S ribosomal protein L25, putative	MRPL25
g3860	60.16	91.51	0.6	0.236	0.564	no	up	28.06	72.18	1.36	0.0641	0.358	no	up	28.06	73.44	1.38	0.0583	0.391	no	up	28.06	68.75	1.29	0.0578	0.173	no	up	hypothetical protein AN1439.2 [Aspergillus nidulans FGSC A4]	_	hypothetical protein	_
g1325	22.4	33.91	0.6	0.236	0.565	no	up	14.84	24.33	0.71	0.361	0.806	no	up	14.84	22.54	0.6	0.446	0.975	no	up	14.84	38.98	1.39	0.0387	0.129	no	up	DUF1716-domain-containing protein [Aspergillus ruber CBS 135680]	_	Putative uncharacterized protein	CTNNBL1
g1254	12.62	19.12	0.6	0.238	0.567	no	up	12.96	18.56	0.51	0.536	0.898	no	up	12.96	7.47	-0.79	0.182	0.738	no	down	12.96	32.34	1.31	0.0501	0.156	no	up	hypothetical protein EURHEDRAFT_378438 [Aspergillus ruber CBS 135680]	_	_	_
g1846	24.9	37.68	0.6	0.238	0.568	no	up	16.59	32	0.94	0.208	0.659	no	up	16.59	19.75	0.25	0.825	1	no	up	16.59	38.49	1.21	0.0729	0.204	no	up	putative mitochondrial outer membrane protein [Aspergillus ruber CBS 135680]	_	Mitochondrial outer membrane protein (Sam35), putative	MTX
g5353	14.24	21.6	0.6	0.241	0.572	no	up	11.73	13.52	0.2	0.893	0.988	no	up	11.73	11.93	0.02	0.918	1	no	up	11.73	23.97	1.02	0.132	0.306	no	up	hypothetical protein EURHEDRAFT_469849 [Aspergillus ruber CBS 135680]	_	Afu4g09630 (Alt. Locus), conserved hypothetical protein	_
g3574	33.25	50.41	0.6	0.248	0.581	no	up	19.91	35.65	0.84	0.292	0.759	no	up	19.91	32.04	0.68	0.398	0.961	no	up	19.91	39.85	1	0.149	0.332	no	up	distribution and morphology protein 35 [Aspergillus ruber CBS 135680]	_	conserved hypothetical protein	TRIAP1, MDM35
g5928	28.56	43.31	0.6	0.25	0.583	no	up	8.83	22.2	1.32	0.0946	0.443	no	up	8.83	22.51	1.34	0.0877	0.502	no	up	8.83	45.67	2.36	0.00131	0.00867	yes	up	DUF1903-domain-containing protein [Aspergillus ruber CBS 135680]	_	Putative uncharacterized protein	_
g6967	0.97	1.52	0.6	0.33	0.666	no	up	1.56	1.1	-0.47	0.508	0.886	no	down	1.56	1.39	-0.16	0.803	1	no	down	1.56	1.26	-0.29	0.795	0.9	no	down	_	_	_	_
g2461	2254.57	3404.74	0.59	0.235	0.563	no	up	2386.78	2458.61	0.04	0.919	0.993	no	up	2386.78	1898.98	-0.33	0.513	0.995	no	down	2386.78	2866.42	0.26	0.696	0.84	no	up	ribosomal protein L10e [Aspergillus ruber CBS 135680]	_	Contig An12c0130, complete genome	RP-L10e, RPL10
g3811	15.73	23.77	0.59	0.236	0.565	no	up	15.74	18.29	0.22	0.871	0.987	no	up	15.74	21.87	0.47	0.568	1	no	up	15.74	36.84	1.22	0.067	0.192	no	up	cytokinesis regulator (Byr4) [Aspergillus oryzae RIB40]	_	_	_
g1201	27.73	41.77	0.59	0.239	0.569	no	up	36.53	30.87	-0.24	0.593	0.917	no	down	36.53	39.05	0.1	0.998	1	no	up	36.53	64.5	0.82	0.218	0.428	no	up	putative chitin synthase activator [Aspergillus ruber CBS 135680]	_	Chitin synthase activator (Chs3), putative	_
g3545	29.85	45	0.59	0.239	0.569	no	up	17.44	26.87	0.62	0.438	0.853	no	up	17.44	16.15	-0.11	0.757	1	no	down	17.44	30.02	0.78	0.244	0.46	no	up	fructosyl amino acid oxidasesarcosine oxidase [Aspergillus ruber CBS 135680]	_	Cofactor: FAD. Precursor (EC 1.5.3.-)	_
g2137	35.39	53.29	0.59	0.239	0.569	no	up	41.01	26.42	-0.63	0.26	0.72	no	down	41.01	31.1	-0.4	0.45	0.975	no	down	41.01	65.37	0.67	0.313	0.537	no	up	PLP-dependent transferase [Aspergillus ruber CBS 135680]	_	Onanonoxo-7-onima-8-eninoihtemlysoneda	BIO3-BIO1
g4230	98.54	148.25	0.59	0.239	0.569	no	up	53.07	108.96	1.04	0.16	0.582	no	up	53.07	80.29	0.6	0.449	0.975	no	up	53.07	141.39	1.41	0.0354	0.121	no	up	mitochondrial import inner membrane translocase subunit tim-17 [Aspergillus ruber CBS 135680]	_	Mitochondrial import inner membrane translocase subunit tim-17	TIM17
g7676	31.91	48.16	0.59	0.239	0.569	no	up	16.72	28.88	0.78	0.308	0.768	no	up	16.72	30.18	0.85	0.258	0.86	no	up	16.72	45.41	1.44	0.0334	0.117	no	up	putative pyridoxal reductase [Aspergillus ruber CBS 135680]	_	Voltage-gated shaker-like K+ channel	E1.1.1.65
g2006	26.95	40.66	0.59	0.239	0.569	no	up	25.95	28.35	0.13	0.977	1	no	up	25.95	34.03	0.39	0.658	1	no	up	25.95	46.34	0.83	0.211	0.42	no	up	hypothetical protein EURHEDRAFT_412228 [Aspergillus ruber CBS 135680]	_	Putative uncharacterized protein	_
g2264	128.65	193.23	0.59	0.24	0.57	no	up	39.82	101.26	1.34	0.0628	0.354	no	up	39.82	115.38	1.53	0.0316	0.262	no	up	39.82	141.6	1.83	0.00698	0.0346	yes	up	Pc12g04370 [Penicillium rubens Wisconsin 54-1255]	_	Pc12g04370	serC, PSAT1
g4968	28.37	42.69	0.59	0.24	0.571	no	up	19.52	34.54	0.82	0.28	0.741	no	up	19.52	25.69	0.39	0.653	1	no	up	19.52	33.25	0.77	0.251	0.468	no	up	hypothetical protein EURHEDRAFT_458494 [Aspergillus ruber CBS 135680]	_	_	_
g3157	14.29	21.58	0.59	0.241	0.572	no	up	16.77	39.93	1.25	0.0865	0.421	no	up	16.77	34.39	1.03	0.158	0.688	no	up	16.77	41.03	1.29	0.0551	0.168	no	up	putative TBC domain protein [Aspergillus ruber CBS 135680]	_	TBC domain protein, putative	_
g7758	10.81	16.33	0.59	0.242	0.572	no	up	6	9.93	0.72	0.357	0.806	no	up	6	9.71	0.69	0.371	0.95	no	up	6	14.68	1.28	0.0575	0.173	no	up	DUF455 domain protein [Aspergillus ruber CBS 135680]	_	Rieske [2Fe-2S] domain protein	_
g741	7.18	10.85	0.59	0.243	0.574	no	up	8.64	10.29	0.25	0.83	0.98	no	up	8.64	12.75	0.56	0.488	0.988	no	up	8.64	20.28	1.22	0.0677	0.194	no	up	putative DNA mismatch repair protein Mlh1 [Aspergillus ruber CBS 135680]	_	Putative uncharacterized protein	MLH1
g484	8.83	13.3	0.59	0.244	0.575	no	up	14.49	12.24	-0.24	0.595	0.917	no	down	14.49	10.6	-0.45	0.406	0.964	no	down	14.49	22.89	0.66	0.325	0.548	no	up	hypothetical protein EURHEDRAFT_513539 [Aspergillus ruber CBS 135680]	_	Voltage-gated chloride channel, putative	CLCN3_4_5
g852	25.09	37.88	0.59	0.249	0.582	no	up	22.94	36.74	0.68	0.397	0.829	no	up	22.94	38.3	0.74	0.339	0.929	no	up	22.94	21.54	-0.09	0.883	0.948	no	down	hypothetical protein EURHEDRAFT_408530 [Aspergillus ruber CBS 135680]	_	Putative uncharacterized protein	_
g6500	2	3.07	0.59	0.264	0.599	no	up	2.13	4.39	1.01	0.198	0.644	no	up	2.13	3.52	0.7	0.397	0.961	no	up	2.13	3.72	0.78	0.283	0.502	no	up	ribonuclease H-like protein [Aspergillus ruber CBS 135680]	_	_	CCE1
g2929	1.06	1.65	0.59	0.319	0.654	no	up	0.52	1.67	1.51	0.0679	0.369	no	up	0.52	90.67	7.19	6.29e-16	4.98e-13	yes	up	0.52	1.84	1.65	0.0324	0.114	no	up	TauD-domain-containing protein [Aspergillus ruber CBS 135680]	_	Contig An13c0080, complete genome. (EC 1.-.-.-)	_
g7164	0.55	0.88	0.59	0.426	0.748	no	up	0.24	0.84	0	1	1	no	no change	0.24	0.17	0	1	1	no	no change	0.24	0.23	0	1	1	no	no change	RTA1-domain-containing protein [Aspergillus ruber CBS 135680]	_	Afu6g09550 (Alt. Locus), RTA1 domain protein, putative	_
g3611	12.52	18.82	0.58	0.241	0.572	no	up	9.22	18.66	1.01	0.171	0.603	no	up	9.22	21.54	1.22	0.0908	0.514	no	up	9.22	29.89	1.69	0.0122	0.0539	no	up	hypothetical protein ATEG_01542 [Aspergillus terreus NIH2624]	_	Putative uncharacterized protein	_
g7253	17.3	25.99	0.58	0.242	0.572	no	up	21.37	19.43	-0.14	0.708	0.951	no	down	21.37	34.33	0.68	0.374	0.95	no	up	21.37	40.24	0.91	0.171	0.367	no	up	hypothetical protein EURHEDRAFT_406592 [Aspergillus ruber CBS 135680]	_	_	_
g3131	36.06	54.12	0.58	0.242	0.572	no	up	24.77	30.06	0.28	0.797	0.975	no	up	24.77	44.78	0.85	0.253	0.851	no	up	24.77	84.86	1.77	0.00878	0.0418	yes	up	C2H2 finger domain protein [Aspergillus ruber CBS 135680]	_	C2H2 finger domain protein, putative	_
g8133	38.93	58.42	0.58	0.242	0.573	no	up	72.6	66.76	-0.12	0.726	0.956	no	down	72.6	74.68	0.04	0.93	1	no	up	72.6	97.59	0.43	0.524	0.725	no	up	hypothetical protein EURHEDRAFT_414848 [Aspergillus ruber CBS 135680]	_	Putative uncharacterized protein	_
g7865	51.18	76.74	0.58	0.242	0.573	no	up	26.89	45.21	0.75	0.332	0.787	no	up	26.89	43.06	0.68	0.379	0.953	no	up	26.89	35.13	0.38	0.568	0.757	no	up	putative GTP binding protein [Aspergillus ruber CBS 135680]	_	Afu5g12580 (Alt. Locus), GTP binding protein (GTPBP1), putative, similar to GTPBP1 (GI:47678 [...]	_
g2869	447.3	668.79	0.58	0.243	0.575	no	up	525.23	568.32	0.11	0.994	1	no	up	525.23	398.49	-0.4	0.448	0.975	no	down	525.23	453.01	-0.21	0.734	0.865	no	down	NAP-domain-containing protein [Aspergillus ruber CBS 135680]	_	Nucleosome assembly protein Nap1, putative	NAP1L1, NRP
g7706	95.03	141.95	0.58	0.244	0.576	no	up	98.15	98.54	0.01	0.875	0.987	no	up	98.15	113.32	0.21	0.868	1	no	up	98.15	146.54	0.58	0.385	0.606	no	up	Hira-domain-containing protein [Aspergillus ruber CBS 135680]	_	Histone transcription regulator Hir1, putative	HIRA, HIR1
g7633	13.38	20.12	0.58	0.245	0.577	no	up	21.77	19.36	-0.17	0.676	0.943	no	down	21.77	14.05	-0.63	0.272	0.873	no	down	21.77	25.02	0.2	0.772	0.886	no	up	hypothetical protein EURHEDRAFT_411835 [Aspergillus ruber CBS 135680]	_	Putative uncharacterized protein	_
g1155	142.04	211.96	0.58	0.245	0.578	no	up	135.09	124.47	-0.12	0.729	0.956	no	down	135.09	125.32	-0.11	0.752	1	no	down	135.09	205.3	0.6	0.364	0.585	no	up	putative eukaryotic translation initiation factor subunit eIF2A [Aspergillus ruber CBS 135680]	_	Pc20g08010	EIF2A
g3148	32.05	47.89	0.58	0.245	0.578	no	up	43.65	56.45	0.37	0.69	0.946	no	up	43.65	51.73	0.24	0.823	1	no	up	43.65	55.97	0.36	0.594	0.777	no	up	DNA replication licensing factor mcm3 [Aspergillus ruber CBS 135680]	_	Afu1g03920 (Alt. Locus), DNA replication licensing factor Mcm3, putative	MCM3
g7560	8.32	12.5	0.58	0.246	0.578	no	up	2.67	12.76	2.21	0.00196	0.0318	yes	up	2.67	27.59	3.32	5.96e-06	0.000248	yes	up	2.67	8.76	1.68	0.0131	0.057	no	up	putative UDP-glucose,sterol transferase [Aspergillus ruber CBS 135680]	_	Predicted protein	_
g7617	24.24	36.37	0.58	0.246	0.578	no	up	4.12	27.98	2.73	0.000204	0.00557	yes	up	4.12	19.74	2.23	0.00226	0.0344	yes	up	4.12	35.02	3.06	2.17e-05	0.00025	yes	up	putative mitochondrial import inner membrane translocase subunit [Aspergillus ruber CBS 135680]	_	Afu5g02200 (Alt. Locus), Mitochondrial import inner membrane translocase subunit (TIM22), pu [...]	TIM22
g5969	21.01	31.41	0.58	0.246	0.579	no	up	18.4	33.2	0.85	0.263	0.722	no	up	18.4	24.11	0.39	0.659	1	no	up	18.4	42.14	1.19	0.075	0.208	no	up	N2,N2-dimethylguanosine tRNA methyltransferase [Aspergillus ruber CBS 135680]	_	Afu3g04200 (Alt. Locus), N2,N2-dimethylguanosine tRNA methyltransferase	TRMT1, trm1
g5977	36.38	54.32	0.58	0.246	0.579	no	up	25.36	47.95	0.92	0.22	0.675	no	up	25.36	28.24	0.15	0.933	1	no	up	25.36	51.91	1.03	0.122	0.29	no	up	Utp21-domain-containing protein [Aspergillus ruber CBS 135680]	_	Putative uncharacterized protein	UTP21, WDR36
g792	66.39	99	0.58	0.248	0.582	no	up	67.34	65.38	-0.04	0.818	0.977	no	down	67.34	52.51	-0.36	0.488	0.988	no	down	67.34	93.65	0.48	0.479	0.69	no	up	putative phosducin [Aspergillus ruber CBS 135680]	_	Phosducin, putative	_
g3390	75.41	112.78	0.58	0.249	0.582	no	up	57.08	47.61	-0.26	0.585	0.915	no	down	57.08	72.92	0.35	0.704	1	no	up	57.08	226.86	1.99	0.00369	0.0205	yes	up	Cyanovirin-N [Aspergillus ruber CBS 135680]	_	Putative uncharacterized protein	_
g259	8.78	13.14	0.58	0.257	0.592	no	up	16.37	3.12	-2.35	0.000462	0.0104	yes	down	16.37	30.46	0.89	0.23	0.821	no	up	16.37	17.14	0.07	0.937	0.976	no	up	Pc13g02040 [Penicillium rubens Wisconsin 54-1255]	_	Pc13g02040	iolG
g598	0.58	0.92	0.58	0.324	0.66	no	up	0.56	0.71	0.3	0.899	0.988	no	up	0.56	0.46	-0.24	0.779	1	no	down	0.56	1.01	0.75	0.348	0.569	no	up	hypothetical protein EURHEDRAFT_455130 [Aspergillus ruber CBS 135680]	_	Putative uncharacterized protein	_
g250	46.66	69.51	0.57	0.248	0.581	no	up	42.76	51.96	0.28	0.793	0.975	no	up	42.76	63.8	0.58	0.466	0.981	no	up	42.76	63.1	0.56	0.4	0.619	no	up	putative dihydroorotate reductase pyre [Aspergillus ruber CBS 135680]	_	Complex: Paf1 was identified by affinity chromatography	PAF1
g3372	22.78	33.96	0.57	0.248	0.581	no	up	17.48	25.23	0.53	0.523	0.893	no	up	17.48	23	0.39	0.652	1	no	up	17.48	40.19	1.2	0.0727	0.204	no	up	beta and beta-prime subunits of DNA dependent RNA-polymerase [Aspergillus ruber CBS 135680]	_	DNA-directed RNA polymerase (EC 2.7.7.6)	RPC2, POLR3B
g119	85.62	127.41	0.57	0.248	0.581	no	up	75.76	92.73	0.29	0.78	0.972	no	up	75.76	109.51	0.53	0.509	0.993	no	up	75.76	124.75	0.72	0.279	0.499	no	up	L-aminoadipate-semialdehyde dehydrogenase large subunit [Verticillium alfalfae VaMs.102]	_	L-aminoadipate-semialdehyde dehydrogenase large subunit	LYS2
g5223	88.02	130.88	0.57	0.249	0.582	no	up	134.73	129.25	-0.06	0.797	0.975	no	down	134.73	92.44	-0.54	0.329	0.921	no	down	134.73	180.59	0.42	0.528	0.728	no	up	Ribophorin I [Aspergillus ruber CBS 135680]	_	Oligosaccharyl transferase subunit (Alpha), putative	OST1, RPN1
g1607	16.94	25.23	0.57	0.249	0.582	no	up	12.97	26.28	1.01	0.17	0.601	no	up	12.97	16.38	0.33	0.72	1	no	up	12.97	23.58	0.86	0.198	0.404	no	up	DNA replication initiation factor Cdc45 [Aspergillus ruber CBS 135680]	_	Afu1g15310 (Alt. Locus), DNA replication initiation factor Cdc45, similar to DNA replication [...]	CDC45
g1206	23.93	35.64	0.57	0.249	0.582	no	up	18.61	27.84	0.58	0.475	0.872	no	up	18.61	28.69	0.62	0.427	0.971	no	up	18.61	45.82	1.3	0.0532	0.163	no	up	kinase-like protein [Aspergillus ruber CBS 135680]	_	Serine/threonine protein kinase of the CDC7 subfamily involved in DNA synthesis	CDC7
g5961	30.81	45.78	0.57	0.251	0.584	no	up	21.67	37.85	0.8	0.293	0.759	no	up	21.67	16.08	-0.43	0.424	0.971	no	down	21.67	33.84	0.64	0.337	0.559	no	up	Bystin-domain-containing protein [Aspergillus ruber CBS 135680]	_	RRNA processing protein Bystin, putative	ENP1, BYSL
g5492	99.46	148.07	0.57	0.251	0.584	no	up	75.6	97.56	0.37	0.697	0.949	no	up	75.6	80.5	0.09	0.991	1	no	up	75.6	161.16	1.09	0.104	0.263	no	up	dolichol-phosphate mannosyltransferase subunit 3 [Aspergillus ruber CBS 135680]	_	Putative uncharacterized protein	DPM3
g4975	203.71	302.31	0.57	0.251	0.585	no	up	155	269.93	0.8	0.294	0.759	no	up	155	172.68	0.16	0.931	1	no	up	155	147.52	-0.07	0.904	0.959	no	down	glutathione peroxidase [Aspergillus ruber CBS 135680]	_	Glutathione peroxidase	E1.11.1.9
g7268	294.63	436.95	0.57	0.251	0.585	no	up	373.28	595.51	0.67	0.39	0.826	no	up	373.28	365.73	-0.03	0.845	1	no	down	373.28	366.39	-0.03	0.957	0.984	no	down	hypothetical protein EURHEDRAFT_381663 [Aspergillus ruber CBS 135680]	_	_	_
g5055	12.74	18.97	0.57	0.252	0.585	no	up	10.58	17.85	0.75	0.33	0.787	no	up	10.58	20.12	0.92	0.213	0.79	no	up	10.58	34.2	1.68	0.0126	0.0553	no	up	kinase-like protein [Aspergillus ruber CBS 135680]	_	Protein kinase Scy1, putative	SCYL2
g3620	421.86	624.75	0.57	0.252	0.585	no	up	306.54	418.44	0.45	0.604	0.918	no	up	306.54	531.48	0.79	0.29	0.895	no	up	306.54	525.8	0.78	0.242	0.457	no	up	2,3-bisphosphoglycerate-independent phosphoglycerate mutase [Aspergillus ruber CBS 135680]	_	Phosphoglycerate mutase, 2,3-bisphosphoglycerate-independent	gpmI
g6669	10.9	16.25	0.57	0.252	0.585	no	up	7.87	10.82	0.45	0.6	0.918	no	up	7.87	17.75	1.16	0.109	0.571	no	up	7.87	15.2	0.94	0.159	0.349	no	up	alpha/beta-hydrolase [Aspergillus ruber CBS 135680]	_	Lipase/esterase family protein	_
g403	25.75	38.27	0.57	0.252	0.585	no	up	54.29	18.04	-1.58	0.012	0.118	no	down	54.29	55.83	0.04	0.93	1	no	up	54.29	60.84	0.16	0.813	0.91	no	up	hypothetical protein EURHEDRAFT_410010 [Aspergillus ruber CBS 135680]	_	Predicted protein	_
g64	36.41	54.06	0.57	0.252	0.585	no	up	22.74	36.54	0.68	0.384	0.825	no	up	22.74	30.89	0.44	0.605	1	no	up	22.74	51.4	1.17	0.0795	0.216	no	up	hypothetical protein EURHEDRAFT_415928 [Aspergillus ruber CBS 135680]	_	tRNA (guanine-N(1)-)-methyltransferase (EC 2.1.1.31)(tRNA methyltransferase 10); Catalyzes t [...]	TRMT10A, TRM10, RG9MTD2
g3808	13.88	20.66	0.57	0.252	0.586	no	up	21.94	26.6	0.28	0.8	0.975	no	up	21.94	24.43	0.15	0.934	1	no	up	21.94	32.53	0.57	0.397	0.616	no	up	TPT-domain-containing protein [Aspergillus ruber CBS 135680]	_	Glucose-6-phosphate/phosphate and phosphoenolpyruvate/phosphate antiporter	SLC35E1
g5217	15.64	23.21	0.57	0.253	0.586	no	up	14.59	27.81	0.93	0.214	0.666	no	up	14.59	23.58	0.69	0.368	0.948	no	up	14.59	33.64	1.2	0.0721	0.203	no	up	hypothetical protein EURHEDRAFT_378858 [Aspergillus ruber CBS 135680]	_	C6 finger domain protein, putative	_
g3525	10.22	15.18	0.57	0.254	0.588	no	up	11.53	14.96	0.37	0.688	0.946	no	up	11.53	21.54	0.9	0.226	0.815	no	up	11.53	17.52	0.6	0.369	0.59	no	up	putative DNA replication protein [Aspergillus ruber CBS 135680]	_	DNA replication protein, putative	MCM10
g7175	71.99	106.61	0.57	0.254	0.588	no	up	86.73	72.6	-0.26	0.579	0.913	no	down	86.73	115.5	0.41	0.632	1	no	up	86.73	174.01	1	0.132	0.307	no	up	RNA polymerase II subunit A C-terminal domain phosphatase ssu72 [Aspergillus ruber CBS 135680]	_	Transcription/RNA-processing factor Ssu72	SSU72
g6379	25.69	38.12	0.57	0.254	0.588	no	up	26.64	33.49	0.33	0.739	0.96	no	up	26.64	37.55	0.49	0.55	1	no	up	26.64	45.71	0.78	0.245	0.46	no	up	hypothetical protein EURHEDRAFT_412990 [Aspergillus ruber CBS 135680]	_	YagE family protein	_
g4254	11.19	16.71	0.57	0.255	0.589	no	up	13.33	21.29	0.67	0.394	0.829	no	up	13.33	32.44	1.28	0.0772	0.467	no	up	13.33	24.26	0.86	0.201	0.407	no	up	hypothetical protein EURHEDRAFT_456389 [Aspergillus ruber CBS 135680]	_	_	_
g4380	16.13	24.01	0.57	0.255	0.589	no	up	17.05	21.1	0.31	0.767	0.968	no	up	17.05	18.94	0.15	0.942	1	no	up	17.05	17.64	0.05	0.96	0.986	no	up	GATA-domain-containing protein [Aspergillus ruber CBS 135680]	_	Cutinase gene palindrome-binding protein, putative	_
g8066	15.72	23.33	0.57	0.256	0.59	no	up	14.58	16.23	0.15	0.947	0.997	no	up	14.58	12.18	-0.26	0.594	1	no	down	14.58	18.82	0.37	0.589	0.773	no	up	exosome complex subunit Rrp46, putative [Aspergillus flavus NRRL3357]	_	Exosome complex subunit Rrp46, putative	RRP46, EXOSC5
g4368	65.3	96.66	0.57	0.256	0.591	no	up	47.78	75.89	0.67	0.4	0.831	no	up	47.78	53.53	0.16	0.922	1	no	up	47.78	88.87	0.89	0.182	0.382	no	up	hypothetical protein EURHEDRAFT_415150 [Aspergillus ruber CBS 135680]	_	50S ribosomal protein L36, putative	_
g2222	5.82	8.66	0.57	0.258	0.593	no	up	8.19	11.78	0.52	0.533	0.897	no	up	8.19	8.51	0.05	0.948	1	no	up	8.19	14	0.77	0.252	0.469	no	up	hypothetical protein EURHEDRAFT_288851 [Aspergillus ruber CBS 135680]	_	NIF domain protein (AFU_orthologue; AFUA_6G04580)	_
g3913	11.6	17.28	0.57	0.259	0.594	no	up	13.43	13.26	-0.02	0.859	0.984	no	down	13.43	12.69	-0.08	0.796	1	no	down	13.43	17.91	0.41	0.545	0.741	no	up	putative ribonuclease P complex subunit Pop2 [Aspergillus ruber CBS 135680]	_	Pc20g09460	RPP1, RPP30
g7713	16.55	24.55	0.57	0.264	0.599	no	up	12.77	19.31	0.59	0.476	0.872	no	up	12.77	17.2	0.43	0.64	1	no	up	12.77	23.53	0.88	0.2	0.406	no	up	hypothetical protein EURHEDRAFT_416703 [Aspergillus ruber CBS 135680]	_	Predicted protein	COX19
g6915	0.37	0.6	0.57	0.395	0.721	no	up	0.98	0.35	-1.26	0.0817	0.408	no	down	0.98	0.43	-1.03	0.129	0.627	no	down	0.98	0.21	-1.8	0.0236	0.09	no	down	MFS multidrug transporter [Aspergillus ruber CBS 135680]	_	MFS transporter, putative	_
g2920	43.61	64.52	0.56	0.254	0.588	no	up	42.94	50.45	0.23	0.851	0.982	no	up	42.94	51.47	0.26	0.804	1	no	up	42.94	49.42	0.2	0.768	0.885	no	up	hypothetical protein EURHEDRAFT_527558 [Aspergillus ruber CBS 135680]	_	Contig An07c0370, complete genome	_
g7458	10.83	16.05	0.56	0.256	0.59	no	up	10.04	17.13	0.76	0.318	0.776	no	up	10.04	14.1	0.49	0.556	1	no	up	10.04	37.45	1.89	0.00535	0.0277	yes	up	hypothetical protein EURHEDRAFT_461164 [Aspergillus ruber CBS 135680]	_	RNA binding protein	_
g3518	58.58	86.57	0.56	0.258	0.593	no	up	35.87	50.73	0.5	0.555	0.906	no	up	35.87	42.2	0.23	0.841	1	no	up	35.87	87.05	1.28	0.0578	0.173	no	up	hypothetical protein EURHEDRAFT_378013 [Aspergillus ruber CBS 135680]	_	Putative uncharacterized protein	MRPL40
g4961	12.41	18.39	0.56	0.258	0.593	no	up	17.93	17.34	-0.05	0.817	0.977	no	down	17.93	22.8	0.34	0.71	1	no	up	17.93	22.37	0.32	0.638	0.805	no	up	hypothetical protein EURHEDRAFT_403590 [Aspergillus ruber CBS 135680]	_	_	_
g1832	12.84	18.98	0.56	0.259	0.594	no	up	12.02	16.45	0.45	0.605	0.918	no	up	12.02	15.31	0.35	0.71	1	no	up	12.02	30.7	1.35	0.0454	0.146	no	up	bZIP transcription factor [Aspergillus ruber CBS 135680]	_	BZIP transcription factor, putative	_
g6503	81.14	119.42	0.56	0.259	0.594	no	up	40.4	65.6	0.7	0.372	0.815	no	up	40.4	75.75	0.91	0.222	0.808	no	up	40.4	96.54	1.25	0.0613	0.181	no	up	37S ribosomal protein S25, mitochondrial [Aspergillus ruber CBS 135680]	_	37S ribosomal protein S25, mitochondrial	MRPS23
g7398	21.82	32.2	0.56	0.259	0.594	no	up	7.1	13.01	0.86	0.254	0.712	no	up	7.1	29.88	2.06	0.00394	0.0533	no	up	7.1	36.12	2.33	0.000749	0.00544	yes	up	Zip-domain-containing protein [Aspergillus ruber CBS 135680]	_	Pc12g11300	_
g2820	182.51	268.28	0.56	0.259	0.594	no	up	186.01	172	-0.11	0.735	0.959	no	down	186.01	202.93	0.13	0.967	1	no	up	186.01	216.28	0.22	0.75	0.875	no	up	translation initiation factor eIF3 subunit [Aspergillus ruber CBS 135680]	_	Eukaryotic translation initiation factor 3 subunit J (eIF3j)(Eukaryotic translation initiati [...]	EIF3J
g2797	11.26	16.61	0.56	0.259	0.594	no	up	23.19	20.3	-0.19	0.648	0.935	no	down	23.19	20.46	-0.18	0.672	1	no	down	23.19	28.68	0.31	0.651	0.813	no	up	hypothetical protein EURHEDRAFT_407413 [Aspergillus ruber CBS 135680]	_	Putative uncharacterized protein	_
g6254	11.69	17.31	0.56	0.26	0.594	no	up	10.25	19.8	0.94	0.207	0.658	no	up	10.25	21.79	1.08	0.138	0.65	no	up	10.25	14.89	0.53	0.425	0.642	no	up	hypothetical protein EURHEDRAFT_505492 [Aspergillus ruber CBS 135680]	_	_	_
g7579	37.38	55.02	0.56	0.26	0.595	no	up	20.74	39.15	0.91	0.223	0.679	no	up	20.74	57.66	1.47	0.0398	0.304	no	up	20.74	51.63	1.31	0.0505	0.157	no	up	TPT-domain-containing protein [Aspergillus ruber CBS 135680]	_	Pc21g04170	_
g1209	25.46	37.47	0.56	0.262	0.597	no	up	20.63	39.47	0.93	0.212	0.665	no	up	20.63	48.07	1.22	0.0926	0.52	no	up	20.63	38.48	0.9	0.18	0.379	no	up	cysteine proteinase [Aspergillus ruber CBS 135680]	_	Pc20g08180	_
g697	26.91	39.6	0.56	0.262	0.598	no	up	21.59	40.31	0.9	0.234	0.691	no	up	21.59	21.9	0.02	0.91	1	no	up	21.59	32.89	0.6	0.369	0.589	no	up	nagb/rpia/CoA transferase-like protein [Aspergillus ruber CBS 135680]	_	Contig An18c0160, complete genome	EIF2B1
g2641	4.89	7.27	0.56	0.263	0.598	no	up	3.07	3.08	0	0.898	0.988	no	up	3.07	5.52	0.83	0.276	0.877	no	up	3.07	25.48	3.01	2.1e-05	0.000244	yes	up	hypothetical protein EURHEDRAFT_511928 [Aspergillus ruber CBS 135680]	_	_	_
g202	6.05	8.99	0.56	0.267	0.602	no	up	1.48	10.48	2.74	0.000223	0.00596	yes	up	1.48	9.25	2.57	0.000522	0.0101	yes	up	1.48	12.1	2.95	4.92e-05	0.000507	yes	up	alpha-1,6 mannosyltransferase subunit [Aspergillus ruber CBS 135680]	_	Mitochondrial carrier protein, putative	SLC25A20_29, CACT, CACL, CRC1
g3658	1.83	2.75	0.56	0.288	0.623	no	up	1.55	2.56	0.69	0.412	0.838	no	up	1.55	3.63	1.18	0.12	0.602	no	up	1.55	2.95	0.89	0.219	0.429	no	up	hypothetical protein EURHEDRAFT_528826 [Aspergillus ruber CBS 135680]	_	_	_
g8349	1.9	2.85	0.56	0.326	0.662	no	up	0.43	1.61	1.69	0.0694	0.373	no	up	0.43	8.34	3.99	1.73e-06	8.85e-05	yes	up	0.43	3.21	2.64	0.0015	0.0097	yes	up	hypothetical protein AFLA_060030 [Aspergillus flavus NRRL3357]	_	_	_
g5433	1	1.52	0.56	0.355	0.689	no	up	0.17	0.87	0	1	1	no	no change	0.17	0.67	0	1	1	no	no change	0.17	0.9	0	1	1	no	no change	NmrA-like family protein [Aspergillus ruber CBS 135680]	_	_	_
g1204	46.84	68.85	0.55	0.26	0.594	no	up	52.48	57.96	0.14	0.959	0.999	no	up	52.48	51.22	-0.03	0.839	1	no	down	52.48	75.93	0.53	0.425	0.643	no	up	Bromodomain-containing protein [Aspergillus ruber CBS 135680]	_	RSC complex subunit (RSC1), putative	RSC1_2
g1168	21.71	31.93	0.55	0.261	0.595	no	up	23.91	24.87	0.06	0.938	0.997	no	up	23.91	23.81	-0.01	0.875	1	no	down	23.91	39.33	0.72	0.282	0.502	no	up	MAP kinase [Aspergillus ruber CBS 135680]	_	Afu3g05900 (Alt. Locus), MAP kinase kinase Ste7, similar to dual specificity protein kinase [...]	STE7
g427	19.29	28.36	0.55	0.261	0.595	no	up	14.9	23.04	0.63	0.432	0.849	no	up	14.9	21.23	0.51	0.532	1	no	up	14.9	35.95	1.27	0.0585	0.175	no	up	putative mitochondrial AAA ATPase [Aspergillus ruber CBS 135680]	_	Putative uncharacterized protein	_
g4986	23.35	34.29	0.55	0.262	0.598	no	up	14.86	30.04	1.01	0.171	0.603	no	up	14.86	19.21	0.37	0.68	1	no	up	14.86	43.34	1.54	0.0222	0.086	no	up	FAD/NAD(P)-binding domain-containing protein [Aspergillus ruber CBS 135680]	_	Putative uncharacterized protein	_
g1148	55.8	81.86	0.55	0.262	0.598	no	up	130.69	91.32	-0.52	0.341	0.795	no	down	130.69	117.87	-0.15	0.706	1	no	down	130.69	112.57	-0.22	0.733	0.865	no	down	putative glutaryl-CoA dehydrogenase [Aspergillus ruber CBS 135680]	_	Glutaryl-CoA dehydrogenase	GCDH, gcdH
g506	18.6	27.36	0.55	0.263	0.598	no	up	20.37	25.06	0.3	0.777	0.971	no	up	20.37	25.42	0.32	0.741	1	no	up	20.37	43.56	1.09	0.102	0.26	no	up	Zinc/iron permease [Aspergillus ruber CBS 135680]	_	Similarity to protein SEQ ID NO:13148 from patent EP1074617-A2 - Homo sapiens Precursor	SLC39A9, ZIP9
g1941	26.04	38.22	0.55	0.263	0.598	no	up	36.82	41.2	0.16	0.937	0.996	no	up	36.82	46.68	0.34	0.711	1	no	up	36.82	34.2	-0.11	0.862	0.938	no	down	putative RNA binding protein Ligatin/Tma64 [Aspergillus ruber CBS 135680]	_	RNA binding protein Ligatin/Tma64, putative	EIF2D
g7028	936.02	1368.64	0.55	0.264	0.599	no	up	993.4	799.93	-0.31	0.52	0.891	no	down	993.4	1400.93	0.5	0.544	1	no	up	993.4	1393.27	0.49	0.464	0.678	no	up	malate dehydrogenase mitochondrial precursor [Aspergillus ruber CBS 135680]	_	Malate dehydrogenase (EC 1.1.1.37)	MDH2
g6938	17.14	25.15	0.55	0.264	0.599	no	up	33.27	18.31	-0.86	0.143	0.548	no	down	33.27	21.53	-0.63	0.271	0.873	no	down	33.27	33.49	0.01	1	1	no	up	hypothetical protein EURHEDRAFT_465981 [Aspergillus ruber CBS 135680]	_	Putative uncharacterized protein	_
g2891	12.22	17.95	0.55	0.264	0.599	no	up	10.91	20.75	0.92	0.219	0.673	no	up	10.91	16.59	0.6	0.448	0.975	no	up	10.91	27.76	1.34	0.0459	0.147	no	up	hypothetical protein EURHEDRAFT_407542 [Aspergillus ruber CBS 135680]	_	_	CENPC
g7956	34.31	50.26	0.55	0.264	0.599	no	up	231.69	28.89	-3	1.14e-05	0.000616	yes	down	231.69	31.98	-2.85	2.68e-05	0.000906	yes	down	231.69	58.48	-1.98	0.00327	0.0185	yes	down	putative mitochondrial cytochrome b2 [Aspergillus ruber CBS 135680]	_	Mitochondrial cytochrome b2, putative	E1.1.2.3, lldD
g1993	196.92	287.8	0.55	0.264	0.599	no	up	108.48	164.24	0.6	0.456	0.861	no	up	108.48	164.76	0.6	0.442	0.975	no	up	108.48	231.03	1.09	0.102	0.259	no	up	mitochondrial import receptor subunit tom22 [Aspergillus ruber CBS 135680]	_	Mitochondrial import receptor subunit tom22	TOM22
g1973	15.19	22.34	0.55	0.265	0.601	no	up	22.25	16.45	-0.43	0.415	0.84	no	down	22.25	25.6	0.2	0.877	1	no	up	22.25	38.33	0.78	0.242	0.457	no	up	hypothetical protein EURHEDRAFT_455576 [Aspergillus ruber CBS 135680]	_	Putative uncharacterized protein	_
g130	64.36	94.4	0.55	0.265	0.601	no	up	55.74	59.49	0.09	0.988	1	no	up	55.74	90.25	0.69	0.368	0.948	no	up	55.74	89.8	0.69	0.307	0.531	no	up	pre-mRNA splicing factor Dim1 [Aspergillus ruber CBS 135680]	_	Pre-mRNA splicing factor Dim1	TXNL4A, DIB1
g2709	19.46	28.57	0.55	0.266	0.601	no	up	36.52	19.77	-0.88	0.135	0.529	no	down	36.52	26.55	-0.46	0.399	0.961	no	down	36.52	42.18	0.21	0.763	0.883	no	up	sterol o-acyltransferase, putative [Aspergillus ruber CBS 135680]	_	Sterol o-acyltransferase (APE2), putative	E2.3.1.26, SOAT
g508	10.08	14.84	0.55	0.266	0.601	no	up	2.7	26.53	3.25	1.1e-05	0.0006	yes	up	2.7	18.71	2.75	0.00016	0.0039	yes	up	2.7	16.8	2.59	0.000214	0.00185	yes	up	putative MFS multidrug transporter [Aspergillus ruber CBS 135680]	_	MFS multidrug transporter, putative	_
g199	44.4	64.97	0.55	0.266	0.602	no	up	20.63	47.52	1.2	0.101	0.458	no	up	20.63	24.11	0.22	0.851	1	no	up	20.63	57.35	1.47	0.0293	0.106	no	up	hypothetical protein EURHEDRAFT_409722 [Aspergillus ruber CBS 135680]	_	Nucleolar protein 16 ; Involved in the biogenesis of the 60S ribosomal subunit (By similarity)	NOP16
g1442	28.56	41.74	0.55	0.266	0.602	no	up	64.82	38.97	-0.73	0.202	0.649	no	down	64.82	55.29	-0.23	0.617	1	no	down	64.82	64.25	-0.01	0.975	0.994	no	down	WD40 repeat-like protein [Aspergillus ruber CBS 135680]	_	component of the chromatin assembly complex (Eurofung)	CHAF1B
[truncated: 6,798 more rows]
