# Supplementary material for: Genome sequencing of Aspergillus glaucus ‘CCHA’ provides insights into salt-stress adaptation
Source: PeerJ. 2020 Feb 24;8:e8609. doi: 10.7717/peerj.8609 (PMC7045888; doi:10.7717/peerj.8609)
Supplement: Supplemental Information 2 [file peerj-08-8609-s002.xls]

## Sheet: Sample36H_1M_vs_Sample36H_3M.DE
id	enrichment	description	ratio_in_study	ratio_in_pop	p_uncorrected	p_bonferroni	type	diff_genes
GO:0016491	e	oxidoreductase activity	162/988	860/8342	6.49e-10	1.07e-06	molecular_function	g1029;g1097;g1186;g1192;g1235;g1243;g140;g149;g1497;g1498;g15;g1511;g1664;g1718;g1773;g1781;g1842;g1883;g1896;g1897;g194;g1978;g1979;g203;g2062;g2063;g2066;g2067;g209;g2097;g2101;g2102;g2106;g2129;g222;g2544;g2650;g2681;g2746;g279;g280;g281;g285;g3022;g3050;g3085;g3137;g3210;g3222;g324;g3276;g3388;g3410;g3613;g3615;g3672;g3673;g3675;g3721;g3918;g3955;g3965;g3981;g401;g4017;g4026;g408;g4081;g4199;…
GO:0055114	e	oxidation-reduction process	150/988	820/8342	1.4e-08	2.32e-05	biological_process	g1029;g1097;g1186;g1235;g140;g149;g1497;g15;g1511;g1664;g1718;g1773;g1781;g1842;g1883;g1896;g1897;g194;g1978;g203;g2062;g2063;g2066;g2067;g209;g2097;g2101;g2102;g2106;g2129;g222;g2544;g2650;g2681;g2746;g279;g280;g281;g285;g3022;g3050;g3085;g3137;g3210;g3222;g3276;g3410;g3613;g3615;g3672;g3673;g3675;g3721;g3918;g3955;g3981;g401;g4017;g4026;g408;g4081;g4199;g4200;g4218;g4236;g4369;g4378;g4481;g4522…
GO:0006582	e	melanin metabolic process	7/988	8/8342	2.3e-06	0.00381	biological_process	g283;g3672;g3674;g3675;g3676;g4235;g4236
GO:0055085	e	transmembrane transport	93/988	492/8342	2.56e-06	0.00424	biological_process	g123;g1296;g1490;g1583;g1635;g1724;g1754;g1894;g2085;g224;g2361;g2379;g2422;g2432;g2638;g2657;g2661;g2917;g3034;g3068;g3069;g3097;g321;g3257;g3382;g3441;g3718;g3843;g3847;g3894;g3924;g3976;g3980;g4001;g4136;g4259;g4480;g4501;g4503;g4506;g4593;g4636;g4855;g4982;g4984;g5069;g5106;g511;g5126;g5205;g5363;g5373;g5389;g5400;g5421;g5671;g5800;g5810;g5811;g5826;g5830;g5898;g5935;g602;g6195;g6201;g6310;g6…
GO:0044710	e	single-organism metabolic process	256/988	1709/8342	1.22e-05	0.0201	biological_process	g1007;g1029;g1097;g1186;g1192;g1235;g1243;g1298;g131;g140;g1426;g1443;g1444;g1445;g1461;g149;g1497;g1498;g15;g1511;g1616;g1664;g1666;g1718;g1773;g1781;g1842;g1883;g1896;g1897;g1925;g194;g1978;g2020;g203;g2062;g2063;g2066;g2067;g209;g2097;g2101;g2102;g2106;g2129;g222;g2301;g2321;g252;g2531;g2544;g2625;g2650;g2654;g2658;g2681;g2695;g2746;g279;g2792;g280;g281;g2816;g283;g285;g2903;g2949;g2983;g3;g30…
GO:0042438	e	melanin biosynthetic process	6/988	7/8342	1.71e-05	0.0284	biological_process	g3672;g3674;g3675;g3676;g4235;g4236
GO:0016614	e	oxidoreductase activity, acting on CH-OH group of donors	38/988	164/8342	4e-05	0.0662	molecular_function	g1029;g1192;g1235;g1243;g1497;g1498;g1718;g2063;g2101;g2102;g2129;g222;g3022;g3137;g3410;g3615;g3675;g3965;g4017;g408;g4199;g4481;g4545;g4606;g5378;g5807;g6056;g609;g6729;g6872;g7187;g7255;g7512;g7724;g8057;g8258;g8265;g8334
GO:0016798	e	hydrolase activity, acting on glycosyl bonds	29/988	117/8342	7.69e-05	0.127	molecular_function	g1001;g1007;g1027;g1557;g1641;g1653;g1666;g2673;g2792;g3029;g3071;g3112;g3934;g43;g5307;g5678;g5859;g6182;g6213;g6682;g6906;g6982;g7158;g7351;g7536;g7611;g7773;g8242;g916
GO:0044699	e	single-organism process	287/988	2001/8342	9.91e-05	0.164	biological_process	g1007;g1029;g1097;g1186;g1192;g1235;g1243;g1298;g131;g140;g1426;g1443;g1444;g1445;g1461;g149;g1497;g1498;g15;g1511;g1583;g1616;g1635;g1657;g1664;g1666;g1718;g1773;g1781;g1842;g1883;g1896;g1897;g1925;g194;g1978;g2020;g203;g2057;g2062;g2063;g2066;g2067;g2085;g209;g2097;g2101;g2102;g2106;g2129;g222;g2301;g2321;g2333;g2377;g2422;g252;g2531;g2544;g2625;g2650;g2654;g2658;g2681;g2695;g2746;g279;g2792;g2…
GO:0004553	e	hydrolase activity, hydrolyzing O-glycosyl compounds	26/988	104/8342	0.00017	0.282	molecular_function	g1007;g1027;g1557;g1641;g1653;g1666;g2673;g2792;g3029;g3071;g3112;g3934;g43;g5307;g5678;g5859;g6182;g6213;g6682;g6982;g7158;g7351;g7536;g7611;g8242;g916
GO:1901615	e	organic hydroxy compound metabolic process	26/988	105/8342	0.000193	0.32	biological_process	g1192;g1235;g1498;g222;g2658;g283;g3137;g3615;g3672;g3674;g3675;g3676;g3965;g4235;g4236;g4606;g5378;g6021;g610;g6886;g7512;g7724;g8222;g8258;g8334;g926
GO:0018958	e	phenol-containing compound metabolic process	9/988	20/8342	0.00022	0.364	biological_process	g2658;g283;g3672;g3674;g3675;g3676;g4235;g4236;g6886
GO:0006804	e	obsolete peroxidase reaction	10/988	25/8342	0.000318	0.526	biological_process	g15;g3050;g3613;g401;g4990;g5619;g5786;g6191;g7182;g8222
GO:0004601	e	peroxidase activity	10/988	25/8342	0.000318	0.526	molecular_function	g15;g3050;g3613;g401;g4990;g5619;g5786;g6191;g7182;g8222
GO:0046189	e	phenol-containing compound biosynthetic process	6/988	10/8342	0.000374	0.619	biological_process	g3672;g3674;g3675;g3676;g4235;g4236
GO:0050662	e	coenzyme binding	38/988	184/8342	0.000485	0.803	molecular_function	g1029;g1192;g1243;g1497;g1498;g1883;g2063;g2101;g2102;g2129;g222;g2553;g2681;g3022;g3137;g3410;g3615;g3972;g408;g4481;g4545;g4606;g4624;g5378;g5807;g609;g6130;g6685;g6729;g7255;g7350;g7512;g7643;g7724;g8057;g8258;g8265;g8334
GO:0016684	e	oxidoreductase activity, acting on peroxide as acceptor	10/988	27/8342	0.000657	1	molecular_function	g15;g3050;g3613;g401;g4990;g5619;g5786;g6191;g7182;g8222
GO:0005975	e	carbohydrate metabolic process	53/988	283/8342	0.000683	1	biological_process	g1007;g1027;g1029;g1235;g1443;g1444;g1445;g1557;g1641;g1653;g222;g2321;g2673;g2792;g283;g3029;g3030;g3071;g3090;g3112;g3410;g3717;g3839;g3842;g3934;g4106;g43;g4438;g4651;g4680;g4712;g5307;g5324;g5678;g5859;g5907;g6021;g609;g610;g6182;g6213;g6682;g6729;g6928;g6982;g7158;g7351;g7490;g7536;g7611;g7725;g8242;g916
GO:0048037	e	cofactor binding	53/988	287/8342	0.000784	1	molecular_function	g1029;g1192;g1243;g1497;g1498;g1883;g2063;g2101;g2102;g2129;g222;g2553;g2681;g3022;g3137;g3169;g3410;g3467;g3615;g3622;g3721;g3972;g408;g4369;g4438;g4481;g4540;g4545;g4606;g4624;g5044;g5335;g5378;g5410;g5807;g5867;g609;g6130;g6523;g6685;g6729;g7255;g7277;g7350;g7418;g7452;g7512;g7643;g7724;g8057;g8258;g8265;g8334
GO:0043446	e	cellular alkane metabolic process	7/988	15/8342	0.00087	1	biological_process	g15;g3050;g401;g4199;g5786;g815;g8222
GO:0015947	e	methane metabolic process	7/988	15/8342	0.00087	1	biological_process	g15;g3050;g401;g4199;g5786;g815;g8222
GO:0050660	e	flavin adenine dinucleotide binding	24/988	102/8342	0.000926	1	molecular_function	g1192;g1497;g1498;g1883;g2063;g2129;g2681;g3022;g3137;g3615;g408;g4606;g4624;g5378;g5807;g6130;g7255;g7350;g7512;g7643;g7724;g8258;g8265;g8334
GO:0016616	e	oxidoreductase activity, acting on the CH-OH group of donors, NAD or NADP as acceptor	29/988	133/8342	0.000986	1	molecular_function	g1029;g1235;g1243;g1497;g1718;g2063;g2101;g2102;g2129;g222;g3022;g3410;g3675;g3965;g4017;g408;g4199;g4481;g4545;g5378;g5807;g6056;g609;g6729;g6872;g7187;g7255;g8057;g8265
GO:0008812	e	choline dehydrogenase activity	9/988	24/8342	0.0011	1	molecular_function	g1192;g1498;g3137;g3615;g4606;g7512;g7724;g8258;g8334
GO:0008509	e	anion transmembrane transporter activity	14/988	49/8342	0.00121	1	molecular_function	g1635;g2422;g2432;g3257;g3924;g3976;g4512;g5389;g5400;g6310;g7012;g7568;g8014;g8088
GO:0006044	e	N-acetylglucosamine metabolic process	3/988	3/8342	0.00166	1	biological_process	g3839;g3842;g3934
GO:0016209	e	antioxidant activity	11/988	35/8342	0.00171	1	molecular_function	g15;g1664;g3050;g3613;g401;g4990;g5619;g5786;g6191;g7182;g8222
GO:0006040	e	amino sugar metabolic process	14/988	51/8342	0.00185	1	biological_process	g1027;g1497;g2063;g2129;g3022;g3839;g3842;g3934;g408;g5378;g5807;g7255;g7351;g8265
GO:0005215	e	transporter activity	60/988	346/8342	0.00212	1	molecular_function	g105;g123;g1296;g1583;g1635;g1724;g1894;g1914;g2057;g2085;g224;g2361;g2422;g2432;g2596;g2661;g2917;g3034;g3068;g3257;g3847;g3924;g3976;g3980;g4136;g4259;g4503;g4506;g4512;g4579;g4636;g4982;g4984;g5069;g5126;g5205;g5363;g5389;g5400;g5671;g5800;g5935;g602;g6310;g6338;g6348;g6393;g6919;g7012;g7043;g7417;g7568;g7639;g7744;g8014;g8078;g8088;g810;g8149;g8188
GO:0006563	e	L-serine metabolic process	16/988	63/8342	0.00254	1	biological_process	g1192;g1498;g3137;g3615;g3622;g3721;g4606;g4947;g5422;g5556;g5858;g6258;g7512;g7724;g8258;g8334
GO:0098656	e	anion transmembrane transport	11/988	37/8342	0.00281	1	biological_process	g1635;g2422;g3257;g3924;g3976;g5389;g5400;g6310;g7568;g8014;g8088
GO:0008762	e	UDP-N-acetylmuramate dehydrogenase activity	9/988	27/8342	0.00285	1	molecular_function	g1497;g2063;g2129;g3022;g408;g5378;g5807;g7255;g8265
GO:0006066	e	alcohol metabolic process	16/988	64/8342	0.00291	1	biological_process	g1192;g1235;g1498;g222;g3137;g3615;g3965;g4606;g5378;g6021;g610;g7512;g7724;g8222;g8258;g8334
GO:0031224	e	intrinsic component of membrane	107/988	692/8342	0.00312	1	cellular_component	g105;g123;g1296;g1490;g1583;g1635;g1724;g1754;g1894;g1914;g2085;g224;g2361;g2379;g2422;g2638;g2657;g2661;g2917;g2949;g3034;g3068;g3069;g3097;g3257;g3382;g3441;g3598;g3718;g3843;g3847;g3894;g3924;g3976;g3980;g4001;g4106;g4136;g414;g4259;g4480;g4501;g4503;g4506;g4522;g4579;g4593;g4624;g4630;g4636;g4847;g4947;g4982;g5069;g5106;g511;g5126;g5205;g5373;g5389;g5400;g5421;g5671;g5800;g5810;g5811;g5818;g5…
GO:0020037	e	heme binding	23/988	104/8342	0.00313	1	molecular_function	g1097;g15;g1842;g1883;g2101;g2102;g3050;g3613;g401;g4200;g4990;g5336;g5619;g5786;g616;g6984;g7181;g731;g7447;g7580;g7643;g8081;g8222
GO:0046906	e	tetrapyrrole binding	23/988	105/8342	0.00331	1	molecular_function	g1097;g15;g1842;g1883;g2101;g2102;g3050;g3613;g401;g4200;g4990;g5336;g5619;g5786;g616;g6984;g7181;g731;g7447;g7580;g7643;g8081;g8222
GO:0009072	e	aromatic amino acid family metabolic process	21/988	94/8342	0.00341	1	biological_process	g131;g15;g2301;g2654;g3050;g3169;g401;g4232;g4235;g4236;g4588;g4744;g5335;g5336;g5390;g5462;g5786;g6531;g740;g8184;g8222
GO:0004096	e	catalase activity	5/988	10/8342	0.00348	1	molecular_function	g15;g3050;g401;g5786;g8222
GO:0016021	e	integral component of membrane	105/988	683/8342	0.00366	1	cellular_component	g105;g123;g1296;g1490;g1583;g1635;g1724;g1754;g1894;g1914;g2085;g224;g2361;g2379;g2422;g2638;g2657;g2661;g2917;g2949;g3034;g3068;g3069;g3097;g3257;g3382;g3441;g3598;g3718;g3843;g3847;g3894;g3924;g3976;g3980;g4001;g4136;g414;g4259;g4480;g4501;g4503;g4506;g4522;g4579;g4593;g4630;g4636;g4847;g4947;g4982;g5069;g5106;g511;g5126;g5205;g5373;g5389;g5400;g5421;g5671;g5800;g5810;g5811;g5818;g5826;g5830;g5…
GO:0008514	e	organic anion transmembrane transporter activity	10/988	33/8342	0.00372	1	molecular_function	g1635;g2422;g3924;g3976;g5389;g5400;g7012;g7568;g8014;g8088
GO:0005342	e	organic acid transmembrane transporter activity	10/988	33/8342	0.00372	1	molecular_function	g1635;g2422;g3924;g3976;g5389;g5400;g7012;g7568;g8014;g8088
GO:0022857	e	transmembrane transporter activity	51/988	292/8342	0.00408	1	molecular_function	g123;g1296;g1583;g1635;g1724;g2057;g2085;g224;g2361;g2422;g2432;g2661;g3034;g3068;g3257;g3924;g3976;g3980;g4136;g4259;g4506;g4512;g4579;g4636;g4982;g4984;g5069;g5126;g5205;g5363;g5389;g5400;g5671;g5800;g5935;g6310;g6338;g6348;g6393;g6919;g7012;g7043;g7417;g7568;g7639;g7744;g8014;g8088;g810;g8149;g8188
GO:0042440	e	pigment metabolic process	7/988	19/8342	0.00445	1	biological_process	g283;g3672;g3674;g3675;g3676;g4235;g4236
GO:0006566	e	threonine metabolic process	15/988	61/8342	0.0046	1	biological_process	g1192;g1498;g3137;g3615;g3721;g3965;g4606;g4947;g5556;g5858;g6258;g7512;g7724;g8258;g8334
GO:1901617	e	organic hydroxy compound biosynthetic process	11/988	40/8342	0.00546	1	biological_process	g222;g3672;g3674;g3675;g3676;g3965;g4235;g4236;g5378;g6021;g8222
GO:0044550	e	secondary metabolite biosynthetic process	10/988	35/8342	0.00592	1	biological_process	g3672;g3674;g3675;g3676;g4235;g4236;g684;g6983;g7350;g8222
GO:0046562	e	glucose oxidase activity	3/988	4/8342	0.00604	1	molecular_function	g1192;g1498;g8334
GO:0047979	e	hexose oxidase activity	3/988	4/8342	0.00604	1	molecular_function	g1192;g1498;g8334
GO:0034637	e	cellular carbohydrate biosynthetic process	7/988	20/8342	0.00616	1	biological_process	g1443;g1444;g1445;g222;g2321;g283;g4651
GO:0003333	e	amino acid transmembrane transport	9/988	30/8342	0.00627	1	biological_process	g1635;g2422;g3924;g3976;g5389;g5400;g7568;g8014;g8088
GO:0015171	e	amino acid transmembrane transporter activity	9/988	30/8342	0.00627	1	molecular_function	g1635;g2422;g3924;g3976;g5389;g5400;g7568;g8014;g8088
GO:0019748	e	secondary metabolic process	11/988	41/8342	0.00668	1	biological_process	g283;g3672;g3674;g3675;g3676;g4235;g4236;g684;g6983;g7350;g8222
GO:0051156	e	glucose 6-phosphate metabolic process	10/988	36/8342	0.00734	1	biological_process	g1192;g1461;g1498;g252;g6021;g609;g610;g6729;g7732;g8334
GO:1905039	e	carboxylic acid transmembrane transport	9/988	31/8342	0.00792	1	biological_process	g1635;g2422;g3924;g3976;g5389;g5400;g7568;g8014;g8088
GO:1903825	e	organic acid transmembrane transport	9/988	31/8342	0.00792	1	biological_process	g1635;g2422;g3924;g3976;g5389;g5400;g7568;g8014;g8088
GO:0008171	e	O-methyltransferase activity	5/988	12/8342	0.00893	1	molecular_function	g5136;g8017;g804;g8184;g942
GO:0006073	e	cellular glucan metabolic process	10/988	37/8342	0.00902	1	biological_process	g1007;g1444;g1445;g2321;g283;g3071;g5859;g6021;g6682;g6982
GO:0006820	e	anion transport	15/988	63/8342	0.00903	1	biological_process	g1635;g2422;g2432;g3257;g3924;g3976;g4512;g5389;g5400;g6310;g7012;g7568;g8014;g8088;g8275
GO:0006544	e	glycine metabolic process	15/988	63/8342	0.00903	1	biological_process	g1192;g1498;g3137;g3615;g3622;g3721;g4606;g4947;g5556;g5858;g6258;g7512;g7724;g8258;g8334
GO:0046943	e	carboxylic acid transmembrane transporter activity	9/988	32/8342	0.00989	1	molecular_function	g1635;g2422;g3924;g3976;g5389;g5400;g7568;g8014;g8088
GO:0044042	e	glucan metabolic process	10/988	38/8342	0.011	1	biological_process	g1007;g1444;g1445;g2321;g283;g3071;g5859;g6021;g6682;g6982
GO:0009074	e	aromatic amino acid family catabolic process	5/988	13/8342	0.0131	1	biological_process	g4235;g4236;g4588;g5335;g5336
GO:0042744	e	hydrogen peroxide catabolic process	3/988	5/8342	0.0138	1	biological_process	g15;g3050;g5786
GO:0042743	e	hydrogen peroxide metabolic process	3/988	5/8342	0.0138	1	biological_process	g15;g3050;g5786
GO:0044003	e	modification by symbiont of host morphology or physiology	2/988	2/8342	0.014	1	biological_process	g8313;g939
GO:0001906	e	cell killing	2/988	2/8342	0.014	1	biological_process	g8313;g939
GO:0001907	e	killing by symbiont of host cells	2/988	2/8342	0.014	1	biological_process	g8313;g939
GO:0052331	e	hemolysis in other organism involved in symbiotic interaction	2/988	2/8342	0.014	1	biological_process	g8313;g939
GO:0044004	e	disruption by symbiont of host cell	2/988	2/8342	0.014	1	biological_process	g8313;g939
GO:0051883	e	killing of cells in other organism involved in symbiotic interaction	2/988	2/8342	0.014	1	biological_process	g8313;g939
GO:2001305	e	xanthone-containing compound metabolic process	2/988	2/8342	0.014	1	biological_process	g3675;g3676
GO:2001307	e	xanthone-containing compound biosynthetic process	2/988	2/8342	0.014	1	biological_process	g3675;g3676
GO:0044364	e	disruption of cells of other organism	2/988	2/8342	0.014	1	biological_process	g8313;g939
GO:0001897	e	cytolysis by symbiont of host cells	2/988	2/8342	0.014	1	biological_process	g8313;g939
GO:0044179	e	hemolysis in other organism	2/988	2/8342	0.014	1	biological_process	g8313;g939
GO:0051715	e	cytolysis in other organism	2/988	2/8342	0.014	1	biological_process	g8313;g939
GO:0044764	e	multi-organism cellular process	2/988	2/8342	0.014	1	biological_process	g8313;g939
GO:0019835	e	cytolysis	2/988	2/8342	0.014	1	biological_process	g8313;g939
GO:0019836	e	hemolysis by symbiont of host erythrocytes	2/988	2/8342	0.014	1	biological_process	g8313;g939
GO:0008271	e	secondary active sulfate transmembrane transporter activity	2/988	2/8342	0.014	1	molecular_function	g3257;g6310
GO:0051801	e	cytolysis in other organism involved in symbiotic interaction	2/988	2/8342	0.014	1	biological_process	g8313;g939
GO:0051817	e	modification of morphology or physiology of other organism involved in symbiotic interaction	2/988	2/8342	0.014	1	biological_process	g8313;g939
GO:0051818	e	disruption of cells of other organism involved in symbiotic interaction	2/988	2/8342	0.014	1	biological_process	g8313;g939
GO:0031640	e	killing of cells of other organism	2/988	2/8342	0.014	1	biological_process	g8313;g939
GO:0035821	e	modification of morphology or physiology of other organism	2/988	2/8342	0.014	1	biological_process	g8313;g939
GO:1901136	e	carbohydrate derivative catabolic process	6/988	18/8342	0.0143	1	biological_process	g1027;g1461;g3410;g3934;g4481;g7351
GO:0046148	e	pigment biosynthetic process	6/988	18/8342	0.0143	1	biological_process	g3672;g3674;g3675;g3676;g4235;g4236
GO:0006865	e	amino acid transport	9/988	34/8342	0.0149	1	biological_process	g1635;g2422;g3924;g3976;g5389;g5400;g7568;g8014;g8088
GO:0006098	e	pentose-phosphate shunt	9/988	34/8342	0.0149	1	biological_process	g1192;g1461;g1498;g252;g609;g610;g6729;g7732;g8334
GO:0016899	e	oxidoreductase activity, acting on the CH-OH group of donors, oxygen as acceptor	4/988	9/8342	0.0151	1	molecular_function	g1192;g1497;g1498;g8334
GO:0004497	e	monooxygenase activity	18/988	86/8342	0.017	1	molecular_function	g1097;g140;g1773;g1842;g280;g281;g3276;g3955;g4200;g4624;g5805;g6199;g6984;g7181;g731;g7447;g7580;g8081
GO:0072593	e	reactive oxygen species metabolic process	5/988	14/8342	0.0185	1	biological_process	g15;g1664;g3050;g4522;g5786
GO:1901071	e	glucosamine-containing compound metabolic process	5/988	14/8342	0.0185	1	biological_process	g1027;g3839;g3842;g3934;g7351
GO:0019439	e	aromatic compound catabolic process	14/988	64/8342	0.0188	1	biological_process	g1461;g209;g4235;g4236;g4588;g4799;g5335;g5336;g5390;g5410;g5462;g5805;g6886;g914
GO:0044262	e	cellular carbohydrate metabolic process	20/988	103/8342	0.0213	1	biological_process	g1007;g1235;g1443;g1444;g1445;g1557;g222;g2321;g283;g3071;g4651;g4680;g5859;g6021;g609;g610;g6682;g6729;g6982;g7490
GO:0008422	e	beta-glucosidase activity	4/988	10/8342	0.0228	1	molecular_function	g1557;g3071;g6682;g6982
GO:0009312	e	oligosaccharide biosynthetic process	4/988	10/8342	0.0228	1	biological_process	g1443;g1444;g1445;g4651
GO:0005992	e	trehalose biosynthetic process	4/988	10/8342	0.0228	1	biological_process	g1443;g1444;g1445;g4651
GO:0046351	e	disaccharide biosynthetic process	4/988	10/8342	0.0228	1	biological_process	g1443;g1444;g1445;g4651
GO:0005506	e	iron ion binding	22/988	117/8342	0.0291	1	molecular_function	g1097;g1842;g1883;g3085;g4200;g4990;g5619;g5798;g5799;g5807;g5811;g6886;g6984;g7181;g731;g7447;g7580;g7643;g7719;g7874;g803;g8081
GO:0019682	e	glyceraldehyde-3-phosphate metabolic process	9/988	35/8342	0.03	1	biological_process	g1192;g1461;g1498;g252;g609;g610;g6729;g7732;g8334
GO:0044264	e	cellular polysaccharide metabolic process	10/988	43/8342	0.0302	1	biological_process	g1007;g1444;g1445;g2321;g283;g3071;g5859;g6021;g6682;g6982
GO:0016705	e	oxidoreductase activity, acting on paired donors, with incorporation or reduction of molecular oxygen	20/988	105/8342	0.0316	1	molecular_function	g1097;g1842;g280;g4200;g4624;g4990;g5619;g5805;g5811;g6984;g7181;g731;g7447;g7580;g7643;g7719;g7874;g803;g8081;g935
GO:0005976	e	polysaccharide metabolic process	14/988	67/8342	0.0338	1	biological_process	g1007;g1444;g1445;g1557;g1641;g2321;g283;g3071;g5859;g6021;g6213;g6682;g6982;g916
GO:0006739	e	NADP metabolic process	9/988	37/8342	0.0349	1	biological_process	g1192;g1461;g1498;g252;g609;g610;g6729;g7732;g8334
GO:0015849	e	organic acid transport	9/988	38/8342	0.0384	1	biological_process	g1635;g2422;g3924;g3976;g5389;g5400;g7568;g8014;g8088
GO:0046942	e	carboxylic acid transport	9/988	38/8342	0.0384	1	biological_process	g1635;g2422;g3924;g3976;g5389;g5400;g7568;g8014;g8088
GO:0006572	e	tyrosine catabolic process	2/988	3/8342	0.0387	1	biological_process	g4235;g4236
GO:0035834	e	indole alkaloid metabolic process	2/988	3/8342	0.0387	1	biological_process	g6983;g8222
GO:0042546	e	cell wall biogenesis	2/988	3/8342	0.0387	1	biological_process	g2321;g5819
GO:0052861	e	glucan endo-1,3-beta-glucanase activity, C-3 substituted reducing group	2/988	3/8342	0.0387	1	molecular_function	g6182;g7611
GO:0035835	e	indole alkaloid biosynthetic process	2/988	3/8342	0.0387	1	biological_process	g6983;g8222
GO:0032450	e	maltose alpha-glucosidase activity	2/988	3/8342	0.0387	1	molecular_function	g1007;g1557
GO:0050364	e	tryptophan dimethylallyltransferase activity	2/988	3/8342	0.0387	1	molecular_function	g2062;g6983
GO:0016841	e	ammonia-lyase activity	2/988	3/8342	0.0387	1	molecular_function	g4588;g802
GO:0046168	e	glycerol-3-phosphate catabolic process	2/988	3/8342	0.0387	1	biological_process	g3410;g4481
GO:0046348	e	amino sugar catabolic process	3/988	7/8342	0.0402	1	biological_process	g1027;g3934;g7351
GO:0032040	e	small-subunit processome	3/988	7/8342	0.0402	1	cellular_component	g3174;g3854;g4082
GO:1901072	e	glucosamine-containing compound catabolic process	3/988	7/8342	0.0402	1	biological_process	g1027;g3934;g7351
GO:0005576	e	extracellular region	21/988	115/8342	0.0407	1	cellular_component	g1039;g131;g1498;g1557;g209;g222;g2446;g3071;g3901;g3934;g4106;g5859;g610;g6282;g6982;g7350;g75;g8008;g812;g8334;g916
GO:0015926	e	glucosidase activity	5/988	17/8342	0.0423	1	molecular_function	g1007;g1557;g3071;g6682;g6982
GO:0030684	e	preribosome	4/988	12/8342	0.0444	1	cellular_component	g3174;g3854;g4082;g5936
GO:0004559	e	alpha-mannosidase activity	4/988	12/8342	0.0444	1	molecular_function	g1666;g43;g5307;g8242
GO:0006576	e	cellular biogenic amine metabolic process	15/988	77/8342	0.049	1	biological_process	g131;g15;g210;g2301;g2654;g3050;g3169;g401;g4744;g4799;g5335;g5336;g5462;g5786;g8222

## Sheet: Sample84H_1M_vs_Sample84H_0M.DE
id	enrichment	description	ratio_in_study	ratio_in_pop	p_uncorrected	p_bonferroni	type	diff_genes
GO:0031224	e	intrinsic component of membrane	99/582	692/8342	1.29e-10	1.62e-07	cellular_component	g1033;g109;g1165;g1293;g1296;g139;g150;g1512;g1526;g1583;g1724;g1754;g1766;g185;g1881;g1894;g1947;g202;g2070;g2098;g2118;g2203;g224;g2359;g2379;g2422;g2434;g3068;g3241;g3272;g3346;g342;g3598;g3722;g3894;g3902;g3924;g3969;g4144;g4189;g4292;g4480;g4548;g4564;g4572;g4579;g4604;g4630;g4636;g4865;g500;g5069;g508;g511;g5205;g5210;g5400;g5423;g5671;g5679;g5722;g5815;g5830;g588;g5935;g5948;g6200;g6309;g6…
GO:0016021	e	integral component of membrane	98/582	683/8342	1.73e-10	2.18e-07	cellular_component	g1033;g109;g1165;g1293;g1296;g139;g150;g1512;g1526;g1583;g1724;g1754;g1766;g185;g1881;g1894;g1947;g202;g2070;g2098;g2118;g2203;g224;g2359;g2379;g2422;g2434;g3068;g3241;g3272;g3346;g342;g3598;g3722;g3894;g3902;g3924;g3969;g4144;g4189;g4292;g4480;g4548;g4564;g4572;g4579;g4604;g4630;g4636;g4865;g500;g5069;g508;g511;g5205;g5210;g5400;g5423;g5671;g5679;g5722;g5815;g5830;g588;g5935;g5948;g6200;g6309;g6…
GO:0016491	e	oxidoreductase activity	129/582	860/8342	1.88e-10	2.36e-07	molecular_function	g1031;g1083;g1097;g1243;g1258;g1338;g149;g1514;g156;g1664;g1736;g1896;g1898;g2021;g2022;g2023;g2066;g2093;g2097;g2101;g2102;g2119;g2359;g242;g259;g2636;g2650;g2767;g2782;g280;g3065;g3085;g3116;g3168;g3207;g3210;g3276;g3388;g3542;g3918;g3933;g3965;g3981;g4017;g412;g4144;g4165;g4199;g4234;g4236;g4364;g4481;g4507;g4536;g4545;g4563;g4565;g4575;g4616;g4630;g4736;g4833;g4897;g5063;g5086;g5094;g5189;g53…
GO:0055114	e	oxidation-reduction process	123/582	820/8342	1.93e-10	2.43e-07	biological_process	g1031;g1083;g1097;g1258;g1338;g149;g1514;g156;g1664;g1736;g1896;g1898;g2021;g2022;g2023;g2066;g2093;g2097;g2101;g2102;g2119;g2359;g242;g259;g2636;g2650;g2767;g2782;g280;g3065;g3085;g3116;g3168;g3207;g3210;g3276;g3542;g3918;g3933;g3981;g4017;g412;g4144;g4165;g4199;g4234;g4236;g4364;g4481;g4507;g4536;g4545;g4563;g4565;g4575;g4616;g4630;g4833;g4897;g5063;g5086;g5094;g5189;g5305;g5423;g5460;g5679;g57…
GO:0055085	e	transmembrane transport	83/582	492/8342	2.05e-10	2.57e-07	biological_process	g1033;g109;g1296;g139;g150;g1512;g1526;g1583;g1724;g1754;g185;g1881;g1894;g1947;g2070;g2098;g2118;g2203;g224;g2379;g2422;g2434;g3068;g3241;g3272;g3346;g342;g3722;g3894;g3902;g3924;g3969;g4189;g4292;g4480;g4548;g4564;g4572;g4604;g4636;g4865;g500;g5069;g508;g511;g5205;g5210;g5400;g5671;g5679;g5722;g5815;g5830;g5935;g5948;g6200;g6309;g6348;g6410;g6439;g6824;g6901;g6919;g6945;g7043;g7146;g7291;g7334;…
GO:0044699	e	single-organism process	203/582	2001/8342	8.95e-10	1.12e-06	biological_process	g1007;g1031;g1083;g1097;g1243;g1258;g1268;g131;g1321;g1338;g14;g1426;g149;g1512;g1514;g1526;g156;g1583;g1624;g1657;g1664;g1736;g1739;g1896;g1898;g1925;g2019;g2021;g2022;g2023;g2057;g2066;g2070;g2093;g2097;g2101;g2102;g2119;g2127;g2359;g242;g2422;g251;g252;g2562;g259;g2605;g2636;g2650;g2767;g2782;g280;g3065;g3085;g3090;g3116;g3168;g3169;g3207;g3210;g3241;g3276;g3277;g3413;g3479;g3480;g3542;g3619;g…
GO:0044710	e	single-organism metabolic process	180/582	1709/8342	9.97e-10	1.25e-06	biological_process	g1007;g1031;g1083;g1097;g1243;g1258;g1268;g131;g1321;g1338;g14;g1426;g149;g1512;g1514;g156;g1624;g1664;g1736;g1739;g1896;g1898;g1925;g2019;g2021;g2022;g2023;g2066;g2093;g2097;g2101;g2102;g2119;g2127;g2359;g242;g251;g252;g2562;g259;g2605;g2636;g2650;g2767;g2782;g280;g3065;g3085;g3090;g3116;g3168;g3169;g3207;g3210;g3276;g3277;g3413;g3479;g3480;g3542;g3619;g3796;g3888;g3918;g3933;g3965;g3981;g4017;g…
GO:0022857	e	transmembrane transporter activity	50/582	292/8342	2.26e-09	2.84e-06	molecular_function	g1296;g1512;g1526;g1583;g1724;g185;g1881;g2057;g2070;g2118;g2203;g224;g2422;g3068;g3241;g342;g3924;g3969;g4189;g4292;g4548;g4564;g4579;g4604;g4636;g500;g5069;g5205;g5210;g5400;g552;g5671;g5679;g5815;g5935;g5948;g6348;g6824;g6901;g6919;g6945;g7043;g7146;g7557;g7993;g8069;g8144;g8188;g8250;g8281
GO:0044425	e	membrane part	99/582	819/8342	2e-08	2.52e-05	cellular_component	g1033;g109;g1165;g1293;g1296;g139;g150;g1512;g1526;g1583;g1724;g1754;g1766;g185;g1881;g1894;g1947;g202;g2070;g2098;g2118;g2203;g224;g2359;g2379;g2422;g2434;g3068;g3241;g3272;g3346;g342;g3598;g3722;g3894;g3902;g3924;g3969;g4144;g4189;g4292;g4480;g4548;g4564;g4572;g4579;g4604;g4630;g4636;g4865;g500;g5069;g508;g511;g5205;g5210;g5400;g5423;g5671;g5679;g5722;g5815;g5830;g588;g5935;g5948;g6200;g6309;g6…
GO:0005215	e	transporter activity	53/582	346/8342	3.47e-08	4.35e-05	molecular_function	g1165;g1296;g1512;g1526;g1583;g1724;g185;g1881;g1894;g1947;g2057;g2070;g2118;g2203;g224;g2422;g3068;g3241;g342;g3924;g3969;g4189;g4292;g4548;g4564;g4579;g4604;g4636;g500;g5069;g5205;g5210;g5400;g552;g5671;g5679;g5815;g5935;g5948;g6348;g6824;g6901;g6919;g6945;g7043;g7146;g7557;g7993;g8069;g8144;g8188;g8250;g8281
GO:0022891	e	substrate-specific transmembrane transporter activity	39/582	241/8342	5.63e-07	0.000708	molecular_function	g1296;g1512;g1526;g1583;g185;g1881;g2057;g2070;g2118;g2422;g3068;g3241;g3924;g3969;g4189;g4548;g4564;g4579;g4604;g4636;g500;g5069;g5210;g5400;g552;g5671;g5679;g5815;g5948;g6348;g6901;g6919;g7557;g7993;g8069;g8144;g8188;g8250;g8281
GO:0006810	e	transport	93/582	806/8342	6.1e-07	0.000766	biological_process	g1033;g109;g1165;g1296;g139;g150;g1512;g1526;g1583;g1657;g1724;g1754;g185;g1881;g1894;g1947;g202;g2057;g2070;g2098;g2118;g2203;g2227;g224;g2379;g2422;g2434;g3068;g3241;g3272;g3346;g342;g3722;g3894;g3902;g3924;g3969;g4189;g4292;g4480;g4548;g4564;g4572;g4579;g4604;g4636;g4865;g500;g5069;g508;g511;g5205;g5210;g5400;g552;g5671;g5679;g5722;g5815;g5830;g5935;g5948;g6200;g6309;g6348;g6410;g6439;g6824;g6…
GO:0051234	e	establishment of localization	93/582	809/8342	6.66e-07	0.000836	biological_process	g1033;g109;g1165;g1296;g139;g150;g1512;g1526;g1583;g1657;g1724;g1754;g185;g1881;g1894;g1947;g202;g2057;g2070;g2098;g2118;g2203;g2227;g224;g2379;g2422;g2434;g3068;g3241;g3272;g3346;g342;g3722;g3894;g3902;g3924;g3969;g4189;g4292;g4480;g4548;g4564;g4572;g4579;g4604;g4636;g4865;g500;g5069;g508;g511;g5205;g5210;g5400;g552;g5671;g5679;g5722;g5815;g5830;g5935;g5948;g6200;g6309;g6348;g6410;g6439;g6824;g6…
GO:0009056	e	catabolic process	51/582	359/8342	7.43e-07	0.000934	biological_process	g1268;g14;g1557;g1739;g1925;g2019;g2023;g2127;g230;g242;g251;g2605;g2636;g3071;g3090;g3277;g3965;g4084;g4165;g4233;g4234;g4235;g4236;g4364;g437;g4481;g4897;g5086;g5115;g5390;g5410;g5460;g5679;g5786;g583;g5859;g609;g6481;g6726;g6727;g6732;g6866;g6982;g7198;g7246;g7266;g7284;g7397;g7951;g812;g86
GO:0016614	e	oxidoreductase activity, acting on CH-OH group of donors	30/582	164/8342	8.37e-07	0.00105	molecular_function	g1243;g1898;g2021;g2101;g2102;g2767;g3965;g4017;g412;g4199;g4481;g4536;g4545;g4565;g4736;g5086;g5679;g5791;g5834;g609;g6729;g6872;g7400;g7512;g7951;g7956;g8241;g8258;g8265;g86
GO:0051179	e	localization	93/582	825/8342	1.72e-06	0.00215	biological_process	g1033;g109;g1165;g1296;g139;g150;g1512;g1526;g1583;g1657;g1724;g1754;g185;g1881;g1894;g1947;g202;g2057;g2070;g2098;g2118;g2203;g2227;g224;g2379;g2422;g2434;g3068;g3241;g3272;g3346;g342;g3722;g3894;g3902;g3924;g3969;g4189;g4292;g4480;g4548;g4564;g4572;g4579;g4604;g4636;g4865;g500;g5069;g508;g511;g5205;g5210;g5400;g552;g5671;g5679;g5722;g5815;g5830;g5935;g5948;g6200;g6309;g6348;g6410;g6439;g6824;g6…
GO:0005975	e	carbohydrate metabolic process	42/582	283/8342	2.36e-06	0.00296	biological_process	g1007;g14;g1512;g1557;g1641;g1739;g19;g2034;g2089;g2127;g251;g2605;g2636;g3071;g3090;g3839;g3842;g4111;g4165;g4364;g437;g4536;g4891;g5006;g5086;g5385;g5679;g5791;g583;g5859;g609;g6481;g6727;g6729;g6866;g6982;g7266;g7397;g7725;g7969;g8053;g86
GO:1901575	e	organic substance catabolic process	47/582	336/8342	3.23e-06	0.00406	biological_process	g1268;g14;g1557;g1739;g1925;g2019;g2023;g2127;g230;g251;g2605;g2636;g3071;g3090;g3277;g3965;g4084;g4165;g4233;g4234;g4235;g4236;g4364;g437;g4481;g5086;g5115;g5390;g5410;g5679;g583;g5859;g609;g6481;g6726;g6727;g6732;g6866;g6982;g7198;g7246;g7266;g7284;g7397;g7951;g812;g86
GO:0044248	e	cellular catabolic process	39/582	261/8342	5.22e-06	0.00655	biological_process	g1268;g14;g1557;g1925;g2019;g2023;g2127;g230;g242;g2636;g3071;g3090;g3277;g3965;g4233;g4234;g4235;g4236;g4364;g4897;g5115;g5390;g5410;g5460;g5679;g5786;g583;g609;g6481;g6726;g6727;g6732;g6866;g6982;g7246;g7284;g7951;g812;g86
GO:0022892	e	substrate-specific transporter activity	39/582	262/8342	5.56e-06	0.00699	molecular_function	g1296;g1512;g1526;g1583;g185;g1881;g2057;g2070;g2118;g2422;g3068;g3241;g3924;g3969;g4189;g4548;g4564;g4579;g4604;g4636;g500;g5069;g5210;g5400;g552;g5671;g5679;g5815;g5948;g6348;g6901;g6919;g7557;g7993;g8069;g8144;g8188;g8250;g8281
GO:0044712	e	single-organism catabolic process	32/582	199/8342	7.06e-06	0.00887	biological_process	g14;g1925;g2019;g2023;g2127;g251;g2605;g2636;g3090;g3277;g3965;g4084;g4165;g4234;g4235;g4236;g4364;g437;g5115;g5410;g5679;g583;g609;g6726;g6732;g6866;g7198;g7246;g7284;g7951;g812;g86
GO:0020037	e	heme binding	21/582	104/8342	7.68e-06	0.00964	molecular_function	g1097;g1338;g2093;g2101;g2102;g242;g3065;g3207;g4616;g5460;g5786;g7246;g7247;g731;g7447;g7618;g7643;g7767;g7956;g8062;g8222
GO:0046906	e	tetrapyrrole binding	21/582	105/8342	8.98e-06	0.0113	molecular_function	g1097;g1338;g2093;g2101;g2102;g242;g3065;g3207;g4616;g5460;g5786;g7246;g7247;g731;g7447;g7618;g7643;g7767;g7956;g8062;g8222
GO:0003824	e	catalytic activity	271/582	3173/8342	1.39e-05	0.0175	molecular_function	g1007;g1018;g1031;g1083;g1097;g1243;g1258;g1268;g131;g1321;g1338;g1378;g1386;g14;g1426;g149;g1512;g1514;g1557;g156;g1605;g1624;g1641;g1664;g1724;g1736;g1739;g1836;g1895;g1896;g1898;g19;g1925;g2019;g202;g2021;g2022;g2023;g2034;g2043;g2058;g2066;g2089;g2093;g2097;g2101;g2102;g2117;g2119;g2127;g2132;g2203;g230;g2343;g2359;g242;g251;g252;g2540;g2562;g259;g2605;g263;g2636;g2650;g2767;g2782;g28;g280;g2…
GO:0044282	e	small molecule catabolic process	21/582	109/8342	1.65e-05	0.0207	biological_process	g1925;g2019;g2023;g2127;g2636;g3090;g3277;g3965;g4234;g4235;g4236;g4364;g5115;g5679;g583;g609;g6726;g6732;g6866;g7246;g7951
GO:0006066	e	alcohol metabolic process	15/582	64/8342	2.44e-05	0.0306	biological_process	g1898;g251;g2767;g3965;g4364;g437;g4536;g5679;g583;g6866;g7512;g7951;g8222;g8241;g8258
GO:0008643	e	carbohydrate transport	10/582	31/8342	2.93e-05	0.0368	biological_process	g1526;g1583;g4189;g4636;g500;g5948;g6901;g6919;g7043;g7146
GO:1901615	e	organic hydroxy compound metabolic process	20/582	105/8342	3.1e-05	0.0389	biological_process	g1898;g2019;g2023;g251;g2636;g2767;g3965;g4235;g4236;g4364;g437;g4536;g5679;g583;g6866;g7512;g7951;g8222;g8241;g8258
GO:1901616	e	organic hydroxy compound catabolic process	6/582	11/8342	3.84e-05	0.0482	biological_process	g2019;g2023;g3965;g5679;g583;g6866
GO:0016616	e	oxidoreductase activity, acting on the CH-OH group of donors, NAD or NADP as acceptor	23/582	133/8342	4.09e-05	0.0513	molecular_function	g1243;g2021;g2101;g2102;g3965;g4017;g412;g4199;g4481;g4536;g4545;g4565;g4736;g5086;g5679;g5791;g609;g6729;g6872;g7400;g7951;g8265;g86
GO:0009072	e	aromatic amino acid family metabolic process	18/582	94/8342	7.13e-05	0.0895	biological_process	g1268;g131;g2019;g2021;g242;g2636;g3169;g3413;g4233;g4234;g4235;g4236;g5390;g5460;g5786;g6866;g7246;g8222
GO:0016052	e	carbohydrate catabolic process	18/582	94/8342	7.13e-05	0.0895	biological_process	g14;g1557;g1739;g251;g2605;g2636;g3071;g4165;g437;g5679;g583;g5859;g6727;g6866;g6982;g7266;g7397;g86
GO:0044275	e	cellular carbohydrate catabolic process	7/582	17/8342	8.14e-05	0.102	biological_process	g14;g1557;g3071;g5679;g583;g6727;g6982
GO:0046395	e	carboxylic acid catabolic process	18/582	95/8342	8.24e-05	0.103	biological_process	g1925;g2019;g2023;g2127;g2636;g3090;g3277;g3965;g4234;g4235;g4236;g4364;g5115;g609;g6726;g6732;g6866;g7246
GO:0016054	e	organic acid catabolic process	18/582	95/8342	8.24e-05	0.103	biological_process	g1925;g2019;g2023;g2127;g2636;g3090;g3277;g3965;g4234;g4235;g4236;g4364;g5115;g609;g6726;g6732;g6866;g7246
GO:0004553	e	hydrolase activity, hydrolyzing O-glycosyl compounds	19/582	104/8342	8.82e-05	0.111	molecular_function	g1007;g14;g1512;g1557;g1641;g1739;g19;g2034;g2089;g3071;g4111;g5006;g5385;g5859;g6481;g6727;g6982;g7397;g8053
GO:0016903	e	oxidoreductase activity, acting on the aldehyde or oxo group of donors	10/582	36/8342	0.000122	0.154	molecular_function	g1031;g2636;g3116;g4165;g4364;g6726;g6731;g6866;g7236;g8138
GO:0048037	e	cofactor binding	38/582	287/8342	0.000125	0.157	molecular_function	g1243;g1258;g1736;g1898;g2101;g2102;g2767;g3169;g3698;g3796;g3933;g3949;g3972;g412;g437;g4481;g4545;g4721;g5086;g5395;g5410;g5753;g5834;g5867;g6036;g609;g6207;g6729;g6981;g7298;g7400;g7512;g7643;g7956;g8140;g8241;g8258;g8265
GO:0043436	e	oxoacid metabolic process	67/582	610/8342	0.000137	0.173	biological_process	g1083;g1243;g1268;g131;g1624;g1898;g1925;g2019;g2021;g2023;g2101;g2102;g2127;g2359;g242;g251;g2605;g2636;g2767;g3085;g3090;g3169;g3277;g3413;g3480;g3619;g3796;g3965;g412;g4165;g4233;g4234;g4235;g4236;g4343;g4364;g437;g4545;g4565;g4721;g5115;g5390;g5395;g5422;g5460;g5786;g5858;g6054;g609;g6466;g6542;g6637;g6726;g6729;g6731;g6732;g6866;g7246;g7512;g7618;g7955;g7956;g8172;g8222;g8241;g8258;g86
GO:0016798	e	hydrolase activity, acting on glycosyl bonds	20/582	117/8342	0.000151	0.19	molecular_function	g1007;g14;g1512;g1557;g1641;g1739;g19;g2034;g2089;g3071;g4111;g5006;g5385;g5859;g6481;g6727;g6906;g6982;g7397;g8053
GO:0006082	e	organic acid metabolic process	67/582	612/8342	0.000187	0.235	biological_process	g1083;g1243;g1268;g131;g1624;g1898;g1925;g2019;g2021;g2023;g2101;g2102;g2127;g2359;g242;g251;g2605;g2636;g2767;g3085;g3090;g3169;g3277;g3413;g3480;g3619;g3796;g3965;g412;g4165;g4233;g4234;g4235;g4236;g4343;g4364;g437;g4545;g4565;g4721;g5115;g5390;g5395;g5422;g5460;g5786;g5858;g6054;g609;g6466;g6542;g6637;g6726;g6729;g6731;g6732;g6866;g7246;g7512;g7618;g7955;g7956;g8172;g8222;g8241;g8258;g86
GO:0019752	e	carboxylic acid metabolic process	66/582	605/8342	0.000241	0.302	biological_process	g1083;g1243;g1268;g131;g1624;g1898;g1925;g2019;g2021;g2023;g2101;g2102;g2127;g2359;g242;g251;g2605;g2636;g2767;g3085;g3090;g3169;g3277;g3413;g3480;g3619;g3796;g3965;g412;g4165;g4233;g4234;g4235;g4236;g4343;g4364;g437;g4545;g4565;g4721;g5115;g5390;g5395;g5422;g5460;g5786;g5858;g6054;g609;g6466;g6542;g6637;g6726;g6729;g6731;g6732;g6866;g7246;g7512;g7618;g7956;g8172;g8222;g8241;g8258;g86
GO:1901361	e	organic cyclic compound catabolic process	15/582	78/8342	0.000268	0.337	biological_process	g1268;g2019;g2023;g230;g2636;g3277;g4233;g4234;g4235;g4236;g5390;g5410;g6732;g7246;g86
GO:0051213	e	dioxygenase activity	14/582	70/8342	0.000279	0.35	molecular_function	g1338;g2023;g3065;g3085;g4234;g4236;g4897;g5063;g5825;g6200;g7001;g7246;g7643;g803
GO:0034308	e	primary alcohol metabolic process	5/582	10/8342	0.000305	0.383	biological_process	g3965;g437;g6866;g7951;g8222
GO:0046164	e	alcohol catabolic process	4/582	6/8342	0.000314	0.394	biological_process	g3965;g5679;g583;g6866
GO:0006572	e	tyrosine catabolic process	3/582	3/8342	0.000338	0.424	biological_process	g4234;g4235;g4236
GO:0042178	e	xenobiotic catabolic process	7/582	21/8342	0.00038	0.478	biological_process	g1268;g2636;g3277;g4233;g4234;g5390;g86
GO:0006805	e	xenobiotic metabolic process	9/582	34/8342	0.000397	0.499	biological_process	g1268;g2636;g3277;g3619;g4233;g4234;g5390;g711;g86
GO:0006586	e	indolalkylamine metabolic process	13/582	66/8342	0.000533	0.67	biological_process	g1268;g131;g2019;g2021;g242;g2636;g3169;g3413;g5460;g5786;g6866;g7246;g8222
GO:0042430	e	indole-containing compound metabolic process	13/582	66/8342	0.000533	0.67	biological_process	g1268;g131;g2019;g2021;g242;g2636;g3169;g3413;g5460;g5786;g6866;g7246;g8222
GO:0006568	e	tryptophan metabolic process	13/582	66/8342	0.000533	0.67	biological_process	g1268;g131;g2019;g2021;g242;g2636;g3169;g3413;g5460;g5786;g6866;g7246;g8222
GO:0016620	e	oxidoreductase activity, acting on the aldehyde or oxo group of donors, NAD or NADP as acceptor	8/582	29/8342	0.000618	0.776	molecular_function	g1031;g2636;g3116;g4364;g6731;g6866;g7236;g8138
GO:0032787	e	monocarboxylic acid metabolic process	29/582	218/8342	0.000658	0.826	biological_process	g1243;g1268;g131;g1925;g2019;g2023;g2101;g2102;g2127;g2359;g251;g2605;g2636;g3277;g3480;g412;g4165;g437;g4565;g5115;g6054;g609;g6542;g6729;g6866;g7618;g7956;g8172;g86
GO:0009308	e	amine metabolic process	15/582	85/8342	0.000701	0.881	biological_process	g1268;g131;g2019;g2021;g242;g2636;g3169;g3413;g5460;g5786;g6036;g6866;g7246;g7298;g8222
GO:0044262	e	cellular carbohydrate metabolic process	17/582	103/8342	0.000707	0.888	biological_process	g1007;g14;g1512;g1557;g2127;g251;g3071;g4364;g4536;g5679;g583;g5859;g609;g6727;g6729;g6982;g7969
GO:0051275	e	beta-glucan catabolic process	3/582	4/8342	0.00128	1	biological_process	g3071;g6727;g6982
GO:0030245	e	cellulose catabolic process	3/582	4/8342	0.00128	1	biological_process	g3071;g6727;g6982
GO:1900673	e	olefin metabolic process	5/582	13/8342	0.00131	1	biological_process	g1268;g2636;g4233;g4234;g5390
GO:0006020	e	inositol metabolic process	4/582	8/8342	0.00131	1	biological_process	g251;g4364;g4536;g583
GO:0018966	e	styrene metabolic process	4/582	8/8342	0.00131	1	biological_process	g1268;g4233;g4234;g5390
GO:0006067	e	ethanol metabolic process	4/582	8/8342	0.00131	1	biological_process	g3965;g437;g6866;g7951
GO:0042207	e	styrene catabolic process	4/582	8/8342	0.00131	1	biological_process	g1268;g4233;g4234;g5390
GO:0044723	e	single-organism carbohydrate metabolic process	21/582	145/8342	0.00136	1	biological_process	g1007;g14;g1512;g1739;g251;g2605;g2636;g3090;g4165;g4364;g437;g4536;g5679;g5791;g583;g5859;g609;g6729;g6866;g7969;g86
GO:0005976	e	polysaccharide metabolic process	12/582	67/8342	0.00206	1	biological_process	g1007;g14;g1512;g1557;g1641;g1739;g3071;g5859;g6727;g6982;g7266;g7969
GO:0006576	e	cellular biogenic amine metabolic process	13/582	77/8342	0.00236	1	biological_process	g1268;g131;g2019;g2021;g242;g2636;g3169;g3413;g5460;g5786;g6866;g7246;g8222
GO:0043446	e	cellular alkane metabolic process	5/582	15/8342	0.00271	1	biological_process	g242;g4199;g5460;g5786;g8222
GO:0015947	e	methane metabolic process	5/582	15/8342	0.00271	1	biological_process	g242;g4199;g5460;g5786;g8222
GO:0050662	e	coenzyme binding	24/582	184/8342	0.00293	1	molecular_function	g1243;g1736;g1898;g2101;g2102;g2767;g3698;g3949;g3972;g412;g437;g4481;g4545;g5086;g5753;g5834;g609;g6729;g7512;g7643;g8140;g8241;g8258;g8265
GO:0044106	e	cellular amine metabolic process	13/582	79/8342	0.00299	1	biological_process	g1268;g131;g2019;g2021;g242;g2636;g3169;g3413;g5460;g5786;g6866;g7246;g8222
GO:0030243	e	cellulose metabolic process	3/582	5/8342	0.00304	1	biological_process	g3071;g6727;g6982
GO:0042744	e	hydrogen peroxide catabolic process	3/582	5/8342	0.00304	1	biological_process	g242;g5460;g5786
GO:0042743	e	hydrogen peroxide metabolic process	3/582	5/8342	0.00304	1	biological_process	g242;g5460;g5786
GO:0006073	e	cellular glucan metabolic process	8/582	37/8342	0.00339	1	biological_process	g1007;g14;g1512;g3071;g5859;g6727;g6982;g7969
GO:0004096	e	catalase activity	4/582	10/8342	0.00351	1	molecular_function	g242;g5460;g5786;g8222
GO:0008422	e	beta-glucosidase activity	4/582	10/8342	0.00351	1	molecular_function	g1557;g3071;g6727;g6982
GO:0009063	e	cellular amino acid catabolic process	12/582	72/8342	0.00383	1	biological_process	g2636;g3090;g3965;g4234;g4235;g4236;g4364;g609;g6726;g6732;g6866;g7246
GO:0003333	e	amino acid transmembrane transport	7/582	30/8342	0.00384	1	biological_process	g1512;g2422;g3924;g3969;g4548;g5400;g8069
GO:0015171	e	amino acid transmembrane transporter activity	7/582	30/8342	0.00384	1	molecular_function	g1512;g2422;g3924;g3969;g4548;g5400;g8069
GO:0044042	e	glucan metabolic process	8/582	38/8342	0.00403	1	biological_process	g1007;g14;g1512;g3071;g5859;g6727;g6982;g7969
GO:0005507	e	copper ion binding	6/582	23/8342	0.00407	1	molecular_function	g156;g3888;g6036;g7298;g7983;g988
GO:0019439	e	aromatic compound catabolic process	11/582	64/8342	0.00434	1	biological_process	g1268;g230;g3277;g4233;g4234;g4235;g4236;g4897;g5390;g5410;g7246
GO:1905039	e	carboxylic acid transmembrane transport	7/582	31/8342	0.00467	1	biological_process	g1512;g2422;g3924;g3969;g4548;g5400;g8069
GO:1903825	e	organic acid transmembrane transport	7/582	31/8342	0.00467	1	biological_process	g1512;g2422;g3924;g3969;g4548;g5400;g8069
GO:0044724	e	single-organism carbohydrate catabolic process	10/582	56/8342	0.00484	1	biological_process	g14;g251;g2605;g2636;g4165;g437;g5679;g583;g6866;g86
GO:0019740	e	nitrogen utilization	2/582	2/8342	0.00486	1	biological_process	g2070;g5210
GO:0009916	e	alternative oxidase activity	2/582	2/8342	0.00486	1	molecular_function	g4144;g4630
GO:0006068	e	ethanol catabolic process	2/582	2/8342	0.00486	1	biological_process	g3965;g6866
GO:0006567	e	threonine catabolic process	2/582	2/8342	0.00486	1	biological_process	g3965;g6866
GO:0006027	e	glycosaminoglycan catabolic process	2/582	2/8342	0.00486	1	biological_process	g1739;g6481
GO:0004334	e	fumarylacetoacetase activity	2/582	2/8342	0.00486	1	molecular_function	g4233;g5390
GO:0034310	e	primary alcohol catabolic process	2/582	2/8342	0.00486	1	biological_process	g3965;g6866
GO:0015926	e	glucosidase activity	5/582	17/8342	0.00497	1	molecular_function	g1007;g1557;g3071;g6727;g6982
GO:0006534	e	cysteine metabolic process	5/582	17/8342	0.00497	1	biological_process	g1083;g3085;g3169;g3796;g5422
GO:0006520	e	cellular amino acid metabolic process	44/582	417/8342	0.00549	1	biological_process	g1083;g1268;g131;g1624;g1898;g2019;g2021;g242;g2636;g2767;g3085;g3090;g3169;g3413;g3796;g3965;g4165;g4233;g4234;g4235;g4236;g4343;g4364;g4545;g4721;g5390;g5395;g5422;g5460;g5786;g5858;g609;g6466;g6542;g6637;g6726;g6731;g6732;g6866;g7246;g7512;g8222;g8241;g8258
GO:0006570	e	tyrosine metabolic process	10/582	57/8342	0.00552	1	biological_process	g2019;g2021;g3169;g3413;g4233;g4234;g4235;g4236;g5390;g6866
GO:1901606	e	alpha-amino acid catabolic process	11/582	66/8342	0.00552	1	biological_process	g2636;g3965;g4234;g4235;g4236;g4364;g609;g6726;g6732;g6866;g7246
GO:1902221	e	erythrose 4-phosphate/phosphoenolpyruvate family amino acid metabolic process	8/582	40/8342	0.00561	1	biological_process	g1268;g2019;g2021;g3169;g3413;g4234;g4236;g6866
GO:0006558	e	L-phenylalanine metabolic process	8/582	40/8342	0.00561	1	biological_process	g1268;g2019;g2021;g3169;g3413;g4234;g4236;g6866
GO:0046943	e	carboxylic acid transmembrane transporter activity	7/582	32/8342	0.00563	1	molecular_function	g1512;g2422;g3924;g3969;g4548;g5400;g8069
GO:0034309	e	primary alcohol biosynthetic process	3/582	6/8342	0.00576	1	biological_process	g3965;g437;g8222
GO:0044247	e	cellular polysaccharide catabolic process	3/582	6/8342	0.00576	1	biological_process	g3071;g6727;g6982
GO:1901565	e	organonitrogen compound catabolic process	17/582	122/8342	0.00601	1	biological_process	g1739;g2636;g3090;g3277;g3965;g4234;g4235;g4236;g4364;g5410;g609;g6481;g6726;g6732;g6866;g7246;g86
GO:0044272	e	sulfur compound biosynthetic process	9/582	49/8342	0.0061	1	biological_process	g1083;g1624;g2605;g3480;g3796;g3888;g5422;g6466;g6866
GO:1901605	e	alpha-amino acid metabolic process	42/582	397/8342	0.00616	1	biological_process	g1083;g1268;g131;g1624;g1898;g2019;g2021;g242;g2636;g2767;g3085;g3169;g3413;g3796;g3965;g4165;g4233;g4234;g4235;g4236;g4343;g4364;g4545;g5390;g5395;g5422;g5460;g5786;g5858;g609;g6466;g6542;g6637;g6726;g6731;g6732;g6866;g7246;g7512;g8222;g8241;g8258
GO:0005342	e	organic acid transmembrane transporter activity	7/582	33/8342	0.00673	1	molecular_function	g1512;g2422;g3924;g3969;g4548;g5400;g8069
GO:0008514	e	organic anion transmembrane transporter activity	7/582	33/8342	0.00673	1	molecular_function	g1512;g2422;g3924;g3969;g4548;g5400;g8069
GO:0006090	e	pyruvate metabolic process	10/582	59/8342	0.00708	1	biological_process	g1243;g251;g2605;g2636;g3480;g4165;g437;g6866;g7956;g86
GO:0072329	e	monocarboxylic acid catabolic process	6/582	26/8342	0.00776	1	biological_process	g1925;g2019;g2023;g2127;g3277;g5115
GO:0000272	e	polysaccharide catabolic process	7/582	34/8342	0.00797	1	biological_process	g1557;g1739;g3071;g5859;g6727;g6982;g7266
GO:0006560	e	proline metabolic process	7/582	34/8342	0.00797	1	biological_process	g1268;g2636;g3169;g5395;g6637;g6731;g6732
GO:0006865	e	amino acid transport	7/582	34/8342	0.00797	1	biological_process	g1512;g2422;g3924;g3969;g4548;g5400;g8069
GO:0000097	e	sulfur amino acid biosynthetic process	5/582	19/8342	0.00831	1	biological_process	g1083;g1624;g3796;g5422;g6466
GO:0044264	e	cellular polysaccharide metabolic process	8/582	43/8342	0.0088	1	biological_process	g1007;g14;g1512;g3071;g5859;g6727;g6982;g7969
GO:0006525	e	arginine metabolic process	7/582	35/8342	0.00938	1	biological_process	g1268;g2636;g3169;g5395;g6637;g6731;g6732
GO:0009251	e	glucan catabolic process	3/582	7/8342	0.00956	1	biological_process	g3071;g6727;g6982
GO:0044281	e	small molecule metabolic process	81/582	888/8342	0.00984	1	biological_process	g1083;g1243;g1268;g131;g1321;g1624;g1739;g1898;g1925;g2019;g2021;g2023;g2101;g2102;g2127;g2359;g242;g251;g252;g2562;g2605;g2636;g2767;g3085;g3090;g3169;g3277;g3413;g3479;g3480;g3619;g3796;g3965;g412;g4165;g4233;g4234;g4235;g4236;g4343;g4364;g437;g4536;g4545;g4565;g4721;g5115;g5390;g5395;g5410;g5422;g5460;g5679;g5786;g5791;g583;g5858;g5859;g6054;g609;g6301;g6466;g6542;g6637;g6726;g6729;g6731;g6732…
GO:0009074	e	aromatic amino acid family catabolic process	4/582	13/8342	0.0101	1	biological_process	g4234;g4235;g4236;g7246
GO:0008652	e	cellular amino acid biosynthetic process	16/582	120/8342	0.0106	1	biological_process	g1083;g1624;g2019;g2021;g3169;g3413;g3796;g4165;g4236;g4545;g5422;g6466;g6542;g6731;g6732;g6866
GO:0000096	e	sulfur amino acid metabolic process	7/582	36/8342	0.011	1	biological_process	g1083;g1624;g3085;g3169;g3796;g5422;g6466
GO:0098656	e	anion transmembrane transport	7/582	37/8342	0.0127	1	biological_process	g1512;g2422;g3924;g3969;g4548;g5400;g8069
GO:0072593	e	reactive oxygen species metabolic process	4/582	14/8342	0.0134	1	biological_process	g1664;g242;g5460;g5786
GO:0035835	e	indole alkaloid biosynthetic process	2/582	3/8342	0.0139	1	biological_process	g6983;g8222
GO:0032450	e	maltose alpha-glucosidase activity	2/582	3/8342	0.0139	1	molecular_function	g1007;g1557
GO:0046168	e	glycerol-3-phosphate catabolic process	2/582	3/8342	0.0139	1	biological_process	g4481;g5086
GO:0006085	e	acetyl-CoA biosynthetic process	2/582	3/8342	0.0139	1	biological_process	g2605;g3480
GO:0035834	e	indole alkaloid metabolic process	2/582	3/8342	0.0139	1	biological_process	g6983;g8222
GO:0006044	e	N-acetylglucosamine metabolic process	2/582	3/8342	0.0139	1	biological_process	g3839;g3842
GO:0072488	e	ammonium transmembrane transport	2/582	3/8342	0.0139	1	biological_process	g2070;g5210
GO:0051273	e	beta-glucan metabolic process	3/582	8/8342	0.0145	1	biological_process	g3071;g6727;g6982
GO:0015849	e	organic acid transport	7/582	38/8342	0.0147	1	biological_process	g1512;g2422;g3924;g3969;g4548;g5400;g8069
GO:0046942	e	carboxylic acid transport	7/582	38/8342	0.0147	1	biological_process	g1512;g2422;g3924;g3969;g4548;g5400;g8069
GO:0009086	e	methionine biosynthetic process	4/582	15/8342	0.0172	1	biological_process	g1083;g1624;g3796;g6466
GO:0009073	e	aromatic amino acid family biosynthetic process	6/582	31/8342	0.0185	1	biological_process	g2019;g2021;g3169;g3413;g4236;g6866
GO:0008509	e	anion transmembrane transporter activity	8/582	49/8342	0.019	1	molecular_function	g1512;g1881;g2422;g3924;g3969;g4548;g5400;g8069
GO:0006757	e	ATP generation from ADP	7/582	40/8342	0.0193	1	biological_process	g251;g2605;g2636;g4165;g437;g6866;g86
GO:0006096	e	glycolytic process	7/582	40/8342	0.0193	1	biological_process	g251;g2605;g2636;g4165;g437;g6866;g86
GO:0009821	e	alkaloid biosynthetic process	3/582	9/8342	0.0207	1	biological_process	g3169;g6983;g8222
GO:0016702	e	oxidoreductase activity, acting on single donors with incorporation of molecular oxygen, incorporation of two atoms of oxygen	4/582	16/8342	0.0217	1	molecular_function	g3085;g4234;g4236;g7246
GO:0006094	e	gluconeogenesis	7/582	41/8342	0.0219	1	biological_process	g251;g2605;g2636;g4165;g437;g6866;g86
GO:0006006	e	glucose metabolic process	7/582	41/8342	0.0219	1	biological_process	g251;g2605;g2636;g4165;g437;g6866;g86
GO:0006165	e	nucleoside diphosphate phosphorylation	7/582	41/8342	0.0219	1	biological_process	g251;g2605;g2636;g4165;g437;g6866;g86
GO:0005996	e	monosaccharide metabolic process	11/582	78/8342	0.0223	1	biological_process	g1739;g251;g2605;g2636;g3090;g4165;g437;g5679;g5791;g6866;g86
GO:0008812	e	choline dehydrogenase activity	5/582	24/8342	0.0228	1	molecular_function	g1898;g2767;g7512;g8241;g8258
GO:0016701	e	oxidoreductase activity, acting on single donors with incorporation of molecular oxygen	5/582	24/8342	0.0228	1	molecular_function	g3085;g4234;g4236;g583;g7246
GO:0042537	e	benzene-containing compound metabolic process	8/582	51/8342	0.0237	1	biological_process	g1268;g3277;g4233;g4234;g5390;g6054;g6866;g7246
GO:0009135	e	purine nucleoside diphosphate metabolic process	7/582	42/8342	0.0247	1	biological_process	g251;g2605;g2636;g4165;g437;g6866;g86
GO:0046031	e	ADP metabolic process	7/582	42/8342	0.0247	1	biological_process	g251;g2605;g2636;g4165;g437;g6866;g86
GO:0009179	e	purine ribonucleoside diphosphate metabolic process	7/582	42/8342	0.0247	1	biological_process	g251;g2605;g2636;g4165;g437;g6866;g86
GO:0009185	e	ribonucleoside diphosphate metabolic process	7/582	42/8342	0.0247	1	biological_process	g251;g2605;g2636;g4165;g437;g6866;g86
GO:0005506	e	iron ion binding	15/582	117/8342	0.0255	1	molecular_function	g1097;g2093;g2359;g3085;g3207;g4616;g4897;g583;g731;g7447;g7618;g7643;g7767;g803;g8062
GO:0004029	e	aldehyde dehydrogenase (NAD) activity	2/582	4/8342	0.0265	1	molecular_function	g2636;g6866
GO:0006115	e	ethanol biosynthetic process	2/582	4/8342	0.0265	1	biological_process	g3965;g437
GO:0008519	e	ammonium transmembrane transporter activity	2/582	4/8342	0.0265	1	molecular_function	g2070;g5210
GO:0090599	e	alpha-glucosidase activity	2/582	4/8342	0.0265	1	molecular_function	g1007;g1557
GO:0071616	e	acyl-CoA biosynthetic process	2/582	4/8342	0.0265	1	biological_process	g2605;g3480
GO:0035384	e	thioester biosynthetic process	2/582	4/8342	0.0265	1	biological_process	g2605;g3480
GO:0046185	e	aldehyde catabolic process	2/582	4/8342	0.0265	1	biological_process	g6866;g7951
GO:0015696	e	ammonium transport	2/582	4/8342	0.0265	1	biological_process	g2070;g5210
GO:0019631	e	quinate catabolic process	2/582	4/8342	0.0265	1	biological_process	g2019;g2023
GO:0019630	e	quinate metabolic process	2/582	4/8342	0.0265	1	biological_process	g2019;g2023
GO:0046174	e	polyol catabolic process	2/582	4/8342	0.0265	1	biological_process	g5679;g583
GO:0043458	e	ethanol biosynthetic process involved in glucose fermentation to ethanol	2/582	4/8342	0.0265	1	biological_process	g3965;g437
GO:0004601	e	peroxidase activity	5/582	25/8342	0.0269	1	molecular_function	g242;g5460;g5786;g6191;g8222
GO:0006804	e	obsolete peroxidase reaction	5/582	25/8342	0.0269	1	biological_process	g242;g5460;g5786;g6191;g8222
GO:0046496	e	nicotinamide nucleotide metabolic process	11/582	81/8342	0.0271	1	biological_process	g251;g252;g2605;g2636;g3479;g4165;g437;g609;g6729;g6866;g86
GO:0019319	e	hexose biosynthetic process	7/582	43/8342	0.0278	1	biological_process	g251;g2605;g2636;g4165;g437;g6866;g86
GO:0046364	e	monosaccharide biosynthetic process	7/582	43/8342	0.0278	1	biological_process	g251;g2605;g2636;g4165;g437;g6866;g86
GO:0030976	e	thiamine pyrophosphate binding	3/582	10/8342	0.028	1	molecular_function	g3949;g3972;g437
GO:0006083	e	acetate metabolic process	3/582	10/8342	0.028	1	biological_process	g1925;g2605;g6866
GO:0010181	e	FMN binding	6/582	34/8342	0.0283	1	molecular_function	g1258;g2101;g2102;g3933;g6981;g7956
GO:0008152	e	metabolic process	265/582	3439/8342	0.0291	1	biological_process	g1007;g1018;g1031;g1083;g1097;g1129;g1243;g1258;g1268;g131;g1321;g1338;g1378;g1386;g14;g1426;g149;g1512;g1514;g1557;g156;g1624;g1641;g1664;g1736;g1739;g1772;g1836;g1895;g1896;g1898;g19;g1925;g2019;g202;g2021;g2022;g2023;g2034;g2043;g2044;g2058;g2066;g2089;g2093;g2097;g2101;g2102;g2117;g2119;g2120;g2127;g2132;g230;g2343;g2359;g242;g251;g252;g2540;g2562;g259;g2605;g263;g2636;g2650;g2767;g2782;g28;g…
GO:0008150	e	biological_process	362/582	4825/8342	0.0295	1	biological_process	g1007;g1018;g1031;g1033;g1083;g109;g1097;g1129;g1165;g1243;g1258;g1268;g1296;g131;g1321;g1338;g1378;g1386;g139;g14;g1426;g149;g150;g1512;g1514;g1526;g1557;g156;g1583;g1624;g1641;g1657;g1664;g1700;g1724;g1736;g1739;g1754;g1771;g1772;g1836;g185;g1881;g1894;g1895;g1896;g1898;g19;g1925;g1947;g2019;g202;g2021;g2022;g2023;g2034;g2043;g2044;g2057;g2058;g2066;g2070;g2089;g2093;g2097;g2098;g2101;g2102;g21…
GO:0019318	e	hexose metabolic process	10/582	71/8342	0.0304	1	biological_process	g1739;g251;g2605;g2636;g3090;g4165;g437;g5791;g6866;g86
GO:0019751	e	polyol metabolic process	5/582	26/8342	0.0314	1	biological_process	g251;g4364;g4536;g5679;g583
GO:0044550	e	secondary metabolite biosynthetic process	6/582	35/8342	0.0322	1	biological_process	g2127;g4235;g4236;g6866;g6983;g8222
GO:0016209	e	antioxidant activity	6/582	35/8342	0.0322	1	molecular_function	g1664;g242;g5460;g5786;g6191;g8222
GO:1901136	e	carbohydrate derivative catabolic process	4/582	18/8342	0.0327	1	biological_process	g1739;g4481;g5086;g6481
GO:0044765	e	single-organism transport	22/582	203/8342	0.0356	1	biological_process	g1512;g1526;g1583;g2057;g2422;g3241;g3924;g3969;g4189;g4548;g4636;g500;g5400;g552;g5948;g6901;g6919;g6945;g7043;g7146;g7643;g8069
GO:0016684	e	oxidoreductase activity, acting on peroxide as acceptor	5/582	27/8342	0.0365	1	molecular_function	g242;g5460;g5786;g6191;g8222
GO:0006566	e	threonine metabolic process	9/582	61/8342	0.0365	1	biological_process	g1898;g2767;g3965;g5858;g6637;g6866;g7512;g8241;g8258
GO:0016861	e	intramolecular oxidoreductase activity, interconverting aldoses and ketoses	3/582	11/8342	0.0366	1	molecular_function	g251;g252;g3839
GO:0004022	e	alcohol dehydrogenase (NAD) activity	3/582	11/8342	0.0366	1	molecular_function	g3965;g4536;g7400
GO:1901607	e	alpha-amino acid biosynthetic process	14/582	114/8342	0.0385	1	biological_process	g1083;g1624;g2019;g2021;g3169;g3413;g3796;g4165;g4545;g5422;g6466;g6542;g6731;g6732
GO:0009132	e	nucleoside diphosphate metabolic process	7/582	46/8342	0.0386	1	biological_process	g251;g2605;g2636;g4165;g437;g6866;g86
GO:0016042	e	lipid catabolic process	7/582	46/8342	0.0386	1	biological_process	g2127;g2636;g4084;g5115;g7198;g7284;g812
GO:0009066	e	aspartate family amino acid metabolic process	16/582	137/8342	0.0402	1	biological_process	g1083;g1624;g1898;g2636;g2767;g3169;g3796;g3965;g5858;g6466;g6542;g6637;g6866;g7512;g8241;g8258
GO:0019530	e	taurine metabolic process	2/582	5/8342	0.0422	1	biological_process	g3085;g3480
GO:0008131	e	primary amine oxidase activity	2/582	5/8342	0.0422	1	molecular_function	g6036;g7298
GO:0070469	e	respiratory chain	2/582	5/8342	0.0422	1	cellular_component	g4144;g4630
GO:0019694	e	alkanesulfonate metabolic process	2/582	5/8342	0.0422	1	biological_process	g3085;g3480
GO:1902222	e	erythrose 4-phosphate/phosphoenolpyruvate family amino acid catabolic process	2/582	5/8342	0.0422	1	biological_process	g4234;g4236
GO:0072338	e	cellular lactam metabolic process	2/582	5/8342	0.0422	1	biological_process	g6866;g86
GO:0016708	e	oxidoreductase activity, acting on paired donors, with incorporation or reduction of molecular oxygen, NAD(P)H as one donor, and incorporation of two atoms of oxygen into one donor	2/582	5/8342	0.0422	1	molecular_function	g4897;g7643
GO:0006072	e	glycerol-3-phosphate metabolic process	2/582	5/8342	0.0422	1	biological_process	g4481;g5086
GO:0006559	e	L-phenylalanine catabolic process	2/582	5/8342	0.0422	1	biological_process	g4234;g4236
GO:0008677	e	2-dehydropantoate 2-reductase activity	2/582	5/8342	0.0422	1	molecular_function	g2101;g2102
GO:0052646	e	alditol phosphate metabolic process	2/582	5/8342	0.0422	1	biological_process	g4481;g5086
GO:0006084	e	acetyl-CoA metabolic process	2/582	5/8342	0.0422	1	biological_process	g2605;g3480
GO:0015711	e	organic anion transport	7/582	47/8342	0.0428	1	biological_process	g1512;g2422;g3924;g3969;g4548;g5400;g8069
GO:0019362	e	pyridine nucleotide metabolic process	11/582	83/8342	0.0461	1	biological_process	g251;g252;g2605;g2636;g3479;g4165;g437;g609;g6729;g6866;g86
GO:0016641	e	oxidoreductase activity, acting on the CH-NH2 group of donors, oxygen as acceptor	3/582	12/8342	0.0463	1	molecular_function	g6036;g6637;g7298
GO:0046939	e	nucleotide phosphorylation	7/582	48/8342	0.0472	1	biological_process	g251;g2605;g2636;g4165;g437;g6866;g86
GO:0015976	e	carbon utilization	5/582	29/8342	0.0479	1	biological_process	g1243;g251;g252;g3169;g3479
GO:0016705	e	oxidoreductase activity, acting on paired donors, with incorporation or reduction of molecular oxygen	13/582	105/8342	0.0497	1	molecular_function	g1097;g2093;g280;g3207;g4616;g4897;g731;g7447;g7618;g7643;g7767;g803;g8062

## Sheet: Sample84H_1M_vs_Sample84H_3M.DE
id	enrichment	description	ratio_in_study	ratio_in_pop	p_uncorrected	p_bonferroni	type	diff_genes
GO:0055085	e	transmembrane transport	81/577	492/8342	8.67e-11	9.92e-08	biological_process	g1033;g109;g123;g128;g1296;g1512;g1526;g1583;g1767;g1946;g1947;g2098;g2118;g2153;g2379;g2422;g2434;g2755;g2928;g3068;g336;g342;g3722;g3843;g3902;g3969;g3980;g4001;g4115;g4136;g4292;g4480;g4503;g4526;g4548;g4604;g4636;g4865;g4982;g500;g5069;g508;g5088;g511;g5358;g5363;g5389;g5671;g5722;g5767;g5814;g5815;g5830;g5935;g5948;g6310;g6338;g6348;g6410;g6439;g6889;g6919;g6944;g6961;g7043;g7146;g7291;g7334…
GO:0016491	e	oxidoreductase activity	124/577	860/8342	1.47e-10	1.68e-07	molecular_function	g1258;g1338;g140;g149;g1497;g1498;g1511;g1514;g156;g1664;g1736;g1773;g1805;g1896;g1897;g1898;g194;g2062;g2063;g2066;g2093;g2097;g2101;g2102;g2119;g222;g242;g258;g2650;g2767;g279;g285;g2929;g3050;g3065;g3116;g3117;g3210;g3280;g3347;g3388;g3410;g3918;g3965;g3981;g4017;g4026;g408;g4481;g4507;g4525;g4545;g4563;g4575;g4586;g4611;g4630;g4853;g4990;g5040;g5320;g5357;g5371;g5372;g5619;g5786;g5790;g5791;g…
GO:0055114	e	oxidation-reduction process	119/577	820/8342	1.55e-10	1.78e-07	biological_process	g1258;g1338;g140;g149;g1497;g1511;g1514;g156;g1664;g1736;g1773;g1805;g1896;g1897;g1898;g194;g2062;g2063;g2066;g2093;g2097;g2101;g2102;g2119;g222;g242;g258;g2650;g2767;g279;g285;g2929;g3050;g3065;g3116;g3117;g3210;g3280;g3347;g3410;g3918;g3981;g399;g4017;g4026;g408;g4481;g4507;g4525;g4545;g4563;g4575;g4586;g4611;g4630;g4853;g4990;g5040;g5320;g5357;g5371;g5372;g5619;g5786;g5790;g5791;g582;g5824;g58…
GO:0031224	e	intrinsic component of membrane	98/577	692/8342	1.85e-10	2.12e-07	cellular_component	g1033;g109;g123;g128;g1291;g1296;g1512;g1526;g1583;g1767;g1946;g1947;g202;g2098;g2118;g2153;g2379;g2422;g2434;g2662;g2755;g2928;g3068;g336;g342;g3598;g3722;g3843;g3902;g3937;g3969;g3980;g4001;g4115;g4136;g4292;g4480;g4503;g4526;g4548;g4579;g4594;g4604;g4611;g4630;g4636;g4847;g4865;g4982;g500;g5069;g508;g5088;g511;g5146;g5283;g5284;g5358;g5389;g5671;g5722;g5767;g5814;g5815;g5830;g5935;g5948;g6310;…
GO:0016021	e	integral component of membrane	98/577	683/8342	2.49e-10	2.84e-07	cellular_component	g1033;g109;g123;g128;g1291;g1296;g1512;g1526;g1583;g1767;g1946;g1947;g202;g2098;g2118;g2153;g2379;g2422;g2434;g2662;g2755;g2928;g3068;g336;g342;g3598;g3722;g3843;g3902;g3937;g3969;g3980;g4001;g4115;g4136;g4292;g4480;g4503;g4526;g4548;g4579;g4594;g4604;g4611;g4630;g4636;g4847;g4865;g4982;g500;g5069;g508;g5088;g511;g5146;g5283;g5284;g5358;g5389;g5671;g5722;g5767;g5814;g5815;g5830;g5935;g5948;g6310;…
GO:0044425	e	membrane part	100/577	819/8342	6.75e-09	7.73e-06	cellular_component	g1033;g109;g123;g128;g1291;g1296;g1512;g1526;g1583;g1767;g1946;g1947;g202;g2098;g2118;g2153;g2368;g2379;g2422;g2434;g2662;g2755;g2928;g3068;g336;g342;g3598;g3722;g3843;g3902;g3937;g3969;g3980;g399;g4001;g4115;g4136;g4292;g4480;g4503;g4526;g4548;g4579;g4594;g4604;g4611;g4630;g4636;g4847;g4865;g4982;g500;g5069;g508;g5088;g511;g5146;g5283;g5284;g5358;g5389;g5671;g5722;g5767;g5814;g5815;g5830;g5935;g…
GO:0044710	e	single-organism metabolic process	174/577	1709/8342	1.2e-08	1.37e-05	biological_process	g1007;g1064;g1258;g1268;g131;g1338;g14;g140;g1426;g149;g1497;g1498;g1511;g1512;g1514;g1527;g156;g1664;g1736;g1739;g1773;g1805;g1896;g1897;g1898;g194;g2062;g2063;g2066;g2093;g2097;g2101;g2102;g2119;g2135;g2153;g222;g242;g2555;g258;g2605;g2650;g2658;g2767;g279;g285;g2929;g3047;g3050;g3065;g3090;g3116;g3117;g3210;g3277;g3280;g3347;g3410;g3619;g3753;g3888;g3918;g3965;g3981;g399;g4017;g4026;g408;g4084…
GO:0005215	e	transporter activity	54/577	346/8342	1.26e-08	1.45e-05	molecular_function	g123;g1291;g1296;g1512;g1526;g1583;g1946;g1947;g2057;g2118;g2153;g2422;g2662;g3068;g336;g342;g3969;g3980;g4136;g4292;g4503;g4526;g4548;g4579;g4604;g4636;g4982;g500;g5069;g5088;g5283;g5284;g5358;g5363;g5389;g5671;g5767;g5814;g5815;g5935;g5948;g6310;g6338;g6348;g6919;g6961;g7043;g7146;g8069;g810;g8144;g8188;g8250;g8281
GO:0022857	e	transmembrane transporter activity	47/577	292/8342	4.54e-08	5.2e-05	molecular_function	g123;g1296;g1512;g1526;g1583;g1946;g2057;g2118;g2153;g2422;g3068;g336;g342;g3969;g3980;g4136;g4292;g4548;g4579;g4604;g4636;g4982;g500;g5069;g5088;g5283;g5284;g5358;g5363;g5389;g5671;g5814;g5815;g5935;g5948;g6310;g6338;g6348;g6919;g7043;g7146;g8069;g810;g8144;g8188;g8250;g8281
GO:0044699	e	single-organism process	194/577	2001/8342	5.66e-08	6.47e-05	biological_process	g1007;g1064;g1258;g1268;g131;g1338;g14;g140;g1426;g149;g1497;g1498;g1511;g1512;g1514;g1526;g1527;g156;g1583;g1664;g1736;g1739;g1773;g1805;g1896;g1897;g1898;g194;g2057;g2062;g2063;g2066;g2093;g2097;g2101;g2102;g2119;g2135;g2153;g222;g2368;g2377;g242;g2422;g2555;g258;g2605;g2650;g2658;g2767;g279;g285;g2929;g3047;g3050;g3065;g3090;g3115;g3116;g3117;g3210;g3277;g3280;g3347;g336;g3410;g3619;g3753;g388…
GO:0020037	e	heme binding	24/577	104/8342	1.09e-07	0.000124	molecular_function	g1338;g1805;g2093;g2101;g2102;g242;g3050;g3065;g3115;g399;g4990;g5040;g5372;g5619;g5786;g616;g7247;g731;g7618;g7767;g7956;g8062;g8222;g878
GO:0046906	e	tetrapyrrole binding	24/577	105/8342	1.32e-07	0.000151	molecular_function	g1338;g1805;g2093;g2101;g2102;g242;g3050;g3065;g3115;g399;g4990;g5040;g5372;g5619;g5786;g616;g7247;g731;g7618;g7767;g7956;g8062;g8222;g878
GO:0006810	e	transport	93/577	806/8342	3.81e-07	0.000436	biological_process	g1033;g109;g123;g128;g1291;g1296;g1512;g1526;g1583;g1767;g1946;g1947;g202;g2057;g2098;g2118;g2153;g2379;g2422;g2434;g2662;g2755;g2928;g3068;g3115;g336;g342;g3722;g3843;g3902;g3969;g3980;g4001;g4115;g4136;g4292;g4480;g4503;g4526;g4548;g4579;g4604;g4636;g4865;g4982;g500;g5069;g508;g5088;g511;g5146;g5283;g5284;g5358;g5363;g5389;g5618;g5671;g5722;g5767;g5814;g5815;g5830;g5935;g5948;g6310;g6338;g6348;…
GO:0022891	e	substrate-specific transmembrane transporter activity	39/577	241/8342	4.59e-07	0.000525	molecular_function	g123;g1296;g1512;g1526;g1583;g1946;g2057;g2118;g2153;g2422;g3068;g336;g3969;g3980;g4136;g4548;g4579;g4604;g4636;g500;g5069;g5088;g5283;g5284;g5358;g5363;g5389;g5671;g5814;g5815;g5948;g6310;g6348;g6919;g8069;g8144;g8188;g8250;g8281
GO:0051234	e	establishment of localization	93/577	809/8342	5.58e-07	0.000638	biological_process	g1033;g109;g123;g128;g1291;g1296;g1512;g1526;g1583;g1767;g1946;g1947;g202;g2057;g2098;g2118;g2153;g2379;g2422;g2434;g2662;g2755;g2928;g3068;g3115;g336;g342;g3722;g3843;g3902;g3969;g3980;g4001;g4115;g4136;g4292;g4480;g4503;g4526;g4548;g4579;g4604;g4636;g4865;g4982;g500;g5069;g508;g5088;g511;g5146;g5283;g5284;g5358;g5363;g5389;g5618;g5671;g5722;g5767;g5814;g5815;g5830;g5935;g5948;g6310;g6338;g6348;…
GO:0051179	e	localization	93/577	825/8342	1.1e-06	0.00126	biological_process	g1033;g109;g123;g128;g1291;g1296;g1512;g1526;g1583;g1767;g1946;g1947;g202;g2057;g2098;g2118;g2153;g2379;g2422;g2434;g2662;g2755;g2928;g3068;g3115;g336;g342;g3722;g3843;g3902;g3969;g3980;g4001;g4115;g4136;g4292;g4480;g4503;g4526;g4548;g4579;g4604;g4636;g4865;g4982;g500;g5069;g508;g5088;g511;g5146;g5283;g5284;g5358;g5363;g5389;g5618;g5671;g5722;g5767;g5814;g5815;g5830;g5935;g5948;g6310;g6338;g6348;…
GO:0016798	e	hydrolase activity, acting on glycosyl bonds	24/577	117/8342	1.1e-06	0.00126	molecular_function	g1007;g1027;g14;g1410;g1512;g1557;g1641;g1739;g19;g2483;g3029;g339;g5006;g5039;g5385;g5801;g5859;g6475;g6481;g6906;g6982;g7288;g7536;g8053
GO:0004553	e	hydrolase activity, hydrolyzing O-glycosyl compounds	22/577	104/8342	1.8e-06	0.00206	molecular_function	g1007;g1027;g14;g1512;g1557;g1641;g1739;g19;g2483;g3029;g339;g5006;g5039;g5385;g5801;g5859;g6475;g6481;g6982;g7288;g7536;g8053
GO:0022892	e	substrate-specific transporter activity	39/577	262/8342	4.86e-06	0.00556	molecular_function	g123;g1296;g1512;g1526;g1583;g1946;g2057;g2118;g2153;g2422;g3068;g336;g3969;g3980;g4136;g4548;g4579;g4604;g4636;g500;g5069;g5088;g5283;g5284;g5358;g5363;g5389;g5671;g5814;g5815;g5948;g6310;g6348;g6919;g8069;g8144;g8188;g8250;g8281
GO:0016614	e	oxidoreductase activity, acting on CH-OH group of donors	27/577	164/8342	2.62e-05	0.03	molecular_function	g1497;g1498;g1898;g2063;g2101;g2102;g222;g2767;g3410;g3965;g4017;g408;g4481;g4545;g5791;g593;g609;g6640;g6729;g6864;g6872;g7187;g7512;g7956;g8265;g8334;g949
GO:0005975	e	carbohydrate metabolic process	39/577	283/8342	3.57e-05	0.0408	biological_process	g1007;g1027;g1064;g14;g1512;g1557;g1641;g1739;g19;g222;g2483;g2605;g3029;g3090;g339;g3410;g3839;g3842;g4651;g5006;g5039;g5324;g5385;g5791;g5801;g583;g5859;g609;g6475;g6481;g6729;g6982;g7266;g7287;g7288;g7536;g7634;g7969;g8053
GO:0005507	e	copper ion binding	8/577	23/8342	9.65e-05	0.11	molecular_function	g156;g3888;g5283;g5876;g6036;g7298;g7983;g8041
GO:0005976	e	polysaccharide metabolic process	14/577	67/8342	0.000156	0.179	biological_process	g1007;g14;g1512;g1557;g1641;g1739;g5801;g5859;g6475;g6982;g7266;g7287;g7288;g7969
GO:0008643	e	carbohydrate transport	9/577	31/8342	0.000173	0.198	biological_process	g1526;g1583;g4636;g500;g5814;g5948;g6919;g7043;g7146
GO:0006804	e	obsolete peroxidase reaction	8/577	25/8342	0.000188	0.215	biological_process	g242;g3050;g4990;g5372;g5619;g5786;g6191;g8222
GO:0004601	e	peroxidase activity	8/577	25/8342	0.000188	0.215	molecular_function	g242;g3050;g4990;g5372;g5619;g5786;g6191;g8222
GO:0048037	e	cofactor binding	37/577	287/8342	0.000202	0.231	molecular_function	g1258;g1497;g1498;g1736;g1898;g2063;g2101;g2102;g222;g2555;g2767;g3184;g3410;g3972;g408;g4476;g4481;g4540;g4545;g4853;g5044;g5824;g5867;g593;g6036;g609;g6640;g6729;g6864;g6981;g7137;g7298;g7349;g7512;g7956;g8265;g8334
GO:0004096	e	catalase activity	5/577	10/8342	0.000293	0.335	molecular_function	g242;g3050;g5372;g5786;g8222
GO:0032450	e	maltose alpha-glucosidase activity	3/577	3/8342	0.000329	0.377	molecular_function	g1007;g1557;g6475
GO:0016684	e	oxidoreductase activity, acting on peroxide as acceptor	8/577	27/8342	0.000341	0.39	molecular_function	g242;g3050;g4990;g5372;g5619;g5786;g6191;g8222
GO:0016209	e	antioxidant activity	9/577	35/8342	0.000471	0.539	molecular_function	g1664;g242;g3050;g4990;g5372;g5619;g5786;g6191;g8222
GO:0004497	e	monooxygenase activity	15/577	86/8342	0.000728	0.833	molecular_function	g140;g1773;g1805;g2093;g4525;g4575;g5040;g5320;g6199;g6412;g731;g7408;g7767;g8062;g878
GO:0016616	e	oxidoreductase activity, acting on the CH-OH group of donors, NAD or NADP as acceptor	20/577	133/8342	0.000834	0.954	molecular_function	g1497;g2063;g2101;g2102;g222;g3410;g3965;g4017;g408;g4481;g4545;g5791;g593;g609;g6729;g6864;g6872;g7187;g8265;g949
GO:0050662	e	coenzyme binding	25/577	184/8342	0.00103	1	molecular_function	g1497;g1498;g1736;g1898;g2063;g2101;g2102;g222;g2767;g3410;g3972;g408;g4481;g4545;g4853;g5824;g593;g609;g6640;g6729;g6864;g7349;g7512;g8265;g8334
GO:0005576	e	extracellular region	18/577	115/8342	0.00111	1	cellular_component	g1039;g104;g131;g14;g1498;g1557;g1739;g222;g5801;g5859;g6282;g6982;g7287;g7288;g75;g8008;g8033;g8334
GO:0018884	e	carbazole metabolic process	3/577	4/8342	0.00125	1	biological_process	g3277;g6886;g7090
GO:0046232	e	carbazole catabolic process	3/577	4/8342	0.00125	1	biological_process	g3277;g6886;g7090
GO:0090599	e	alpha-glucosidase activity	3/577	4/8342	0.00125	1	molecular_function	g1007;g1557;g6475
GO:0005506	e	iron ion binding	18/577	117/8342	0.00127	1	molecular_function	g1805;g2093;g3115;g399;g4611;g4990;g5040;g5619;g583;g6886;g7090;g731;g7618;g7719;g7767;g803;g8062;g878
GO:0003824	e	catalytic activity	255/577	3173/8342	0.00185	1	molecular_function	g1007;g1027;g104;g1258;g1268;g131;g1338;g1359;g1378;g14;g140;g1401;g1410;g1426;g149;g1497;g1498;g1511;g1512;g1514;g1527;g1557;g156;g1641;g1664;g1736;g1739;g1773;g1789;g1805;g1895;g1896;g1897;g1898;g19;g194;g202;g2058;g2062;g2063;g2066;g2090;g2093;g2097;g210;g2101;g2102;g2117;g2119;g2135;g2153;g222;g2343;g24;g242;g2483;g25;g2540;g2555;g258;g2605;g2650;g2658;g2684;g2767;g279;g28;g285;g29;g2929;g302…
GO:0043446	e	cellular alkane metabolic process	5/577	15/8342	0.00261	1	biological_process	g242;g3050;g5372;g5786;g8222
GO:0015947	e	methane metabolic process	5/577	15/8342	0.00261	1	biological_process	g242;g3050;g5372;g5786;g8222
GO:0016705	e	oxidoreductase activity, acting on paired donors, with incorporation or reduction of molecular oxygen	16/577	105/8342	0.00269	1	molecular_function	g1805;g2093;g4525;g4990;g5040;g5320;g5619;g6412;g731;g7618;g7719;g7767;g803;g8062;g878;g935
GO:0042744	e	hydrogen peroxide catabolic process	3/577	5/8342	0.00296	1	biological_process	g242;g3050;g5786
GO:0042743	e	hydrogen peroxide metabolic process	3/577	5/8342	0.00296	1	biological_process	g242;g3050;g5786
GO:0004930	e	G-protein coupled receptor activity	3/577	5/8342	0.00296	1	molecular_function	g6681;g7072;g7249
GO:0006027	e	glycosaminoglycan catabolic process	2/577	2/8342	0.00478	1	biological_process	g1739;g6481
GO:0015926	e	glucosidase activity	5/577	17/8342	0.00479	1	molecular_function	g1007;g1557;g5801;g6475;g6982
GO:0050660	e	flavin adenine dinucleotide binding	15/577	102/8342	0.00482	1	molecular_function	g1497;g1498;g1898;g2063;g2767;g408;g4853;g5824;g593;g6640;g6864;g7349;g7512;g8265;g8334
GO:0008812	e	choline dehydrogenase activity	6/577	24/8342	0.0049	1	molecular_function	g1498;g1898;g2767;g6640;g7512;g8334
GO:0044262	e	cellular carbohydrate metabolic process	15/577	103/8342	0.00519	1	biological_process	g1007;g14;g1512;g1557;g222;g4651;g5801;g583;g5859;g609;g6475;g6729;g6982;g7634;g7969
GO:0005984	e	disaccharide metabolic process	8/577	40/8342	0.00533	1	biological_process	g1007;g14;g1512;g4651;g5801;g5859;g7634;g7969
GO:0009311	e	oligosaccharide metabolic process	8/577	41/8342	0.00623	1	biological_process	g1007;g14;g1512;g4651;g5801;g5859;g7634;g7969
GO:1901136	e	carbohydrate derivative catabolic process	5/577	18/8342	0.00626	1	biological_process	g1027;g1739;g3410;g4481;g6481
GO:0006040	e	amino sugar metabolic process	9/577	51/8342	0.00755	1	biological_process	g1027;g1497;g2063;g3839;g3842;g408;g593;g6864;g8265
GO:0000272	e	polysaccharide catabolic process	7/577	34/8342	0.00761	1	biological_process	g1557;g1739;g5859;g6982;g7266;g7287;g7288
GO:0006805	e	xenobiotic metabolic process	7/577	34/8342	0.00761	1	biological_process	g1268;g3277;g3619;g6412;g6886;g7090;g711
GO:0044264	e	cellular polysaccharide metabolic process	8/577	43/8342	0.00837	1	biological_process	g1007;g14;g1512;g5801;g5859;g6475;g6982;g7969
GO:0008762	e	UDP-N-acetylmuramate dehydrogenase activity	6/577	27/8342	0.00903	1	molecular_function	g1497;g2063;g408;g593;g6864;g8265
GO:0004806	e	triglyceride lipase activity	4/577	13/8342	0.00979	1	molecular_function	g4084;g6198;g7198;g7287
GO:0044036	e	cell wall macromolecule metabolic process	6/577	28/8342	0.0108	1	biological_process	g1027;g5859;g6481;g7287;g7288;g8202
GO:0006066	e	alcohol metabolic process	10/577	64/8342	0.0118	1	biological_process	g1498;g1898;g222;g2767;g3965;g583;g6640;g7512;g8222;g8334
GO:0006073	e	cellular glucan metabolic process	7/577	37/8342	0.0122	1	biological_process	g1007;g14;g1512;g5801;g5859;g6982;g7969
GO:0098656	e	anion transmembrane transport	7/577	37/8342	0.0122	1	biological_process	g1512;g2422;g3969;g4548;g5389;g6310;g8069
GO:0042178	e	xenobiotic catabolic process	5/577	21/8342	0.0125	1	biological_process	g1268;g3277;g6412;g6886;g7090
GO:0072593	e	reactive oxygen species metabolic process	4/577	14/8342	0.013	1	biological_process	g1664;g242;g3050;g5786
GO:0018970	e	toluene metabolic process	2/577	3/8342	0.0137	1	biological_process	g6886;g7090
GO:0018576	e	catechol 1,2-dioxygenase activity	2/577	3/8342	0.0137	1	molecular_function	g6886;g7090
GO:0072491	e	toluene-containing compound catabolic process	2/577	3/8342	0.0137	1	biological_process	g6886;g7090
GO:0018948	e	xylene metabolic process	2/577	3/8342	0.0137	1	biological_process	g6886;g7090
GO:0019114	e	catechol dioxygenase activity	2/577	3/8342	0.0137	1	molecular_function	g6886;g7090
GO:0042184	e	xylene catabolic process	2/577	3/8342	0.0137	1	biological_process	g6886;g7090
GO:0006044	e	N-acetylglucosamine metabolic process	2/577	3/8342	0.0137	1	biological_process	g3839;g3842
GO:0046168	e	glycerol-3-phosphate catabolic process	2/577	3/8342	0.0137	1	biological_process	g3410;g4481
GO:0042203	e	toluene catabolic process	2/577	3/8342	0.0137	1	biological_process	g6886;g7090
GO:0044042	e	glucan metabolic process	7/577	38/8342	0.0141	1	biological_process	g1007;g14;g1512;g5801;g5859;g6982;g7969
GO:0006026	e	aminoglycan catabolic process	3/577	8/8342	0.0142	1	biological_process	g1027;g1739;g6481
GO:0003333	e	amino acid transmembrane transport	6/577	30/8342	0.0152	1	biological_process	g1512;g2422;g3969;g4548;g5389;g8069
GO:0015171	e	amino acid transmembrane transporter activity	6/577	30/8342	0.0152	1	molecular_function	g1512;g2422;g3969;g4548;g5389;g8069
GO:0009308	e	amine metabolic process	12/577	85/8342	0.0157	1	biological_process	g1268;g131;g1401;g210;g242;g2555;g3050;g5372;g5786;g6036;g7298;g8222
GO:0005991	e	trehalose metabolic process	4/577	15/8342	0.0167	1	biological_process	g14;g4651;g7634;g7969
GO:1901615	e	organic hydroxy compound metabolic process	14/577	105/8342	0.0176	1	biological_process	g1498;g1898;g222;g2658;g2767;g3965;g5814;g583;g6640;g6886;g7090;g7512;g8222;g8334
GO:1905039	e	carboxylic acid transmembrane transport	6/577	31/8342	0.0178	1	biological_process	g1512;g2422;g3969;g4548;g5389;g8069
GO:1903825	e	organic acid transmembrane transport	6/577	31/8342	0.0178	1	biological_process	g1512;g2422;g3969;g4548;g5389;g8069
GO:0005982	e	starch metabolic process	6/577	31/8342	0.0178	1	biological_process	g1007;g14;g1512;g5801;g5859;g7969
GO:0005985	e	sucrose metabolic process	6/577	31/8342	0.0178	1	biological_process	g1007;g14;g1512;g5801;g5859;g7969
GO:0099600	e	transmembrane receptor activity	3/577	9/8342	0.0202	1	molecular_function	g6681;g7072;g7249
GO:0030203	e	glycosaminoglycan metabolic process	3/577	9/8342	0.0202	1	biological_process	g1739;g6481;g8202
GO:0004888	e	transmembrane signaling receptor activity	3/577	9/8342	0.0202	1	molecular_function	g6681;g7072;g7249
GO:0016899	e	oxidoreductase activity, acting on the CH-OH group of donors, oxygen as acceptor	3/577	9/8342	0.0202	1	molecular_function	g1497;g1498;g8334
GO:0046943	e	carboxylic acid transmembrane transporter activity	6/577	32/8342	0.0206	1	molecular_function	g1512;g2422;g3969;g4548;g5389;g8069
GO:0005342	e	organic acid transmembrane transporter activity	6/577	33/8342	0.0238	1	molecular_function	g1512;g2422;g3969;g4548;g5389;g8069
GO:0008514	e	organic anion transmembrane transporter activity	6/577	33/8342	0.0238	1	molecular_function	g1512;g2422;g3969;g4548;g5389;g8069
GO:0009056	e	catabolic process	36/577	359/8342	0.0248	1	biological_process	g1027;g1064;g1268;g14;g1557;g1739;g242;g2483;g2605;g3047;g3050;g3090;g3277;g3410;g3965;g4084;g4481;g4540;g5044;g5115;g547;g5786;g5814;g583;g5859;g609;g6198;g6412;g6481;g6886;g6982;g7090;g7198;g7266;g7287;g7288
GO:0046486	e	glycerolipid metabolic process	11/577	81/8342	0.0259	1	biological_process	g1739;g3047;g3410;g3619;g4084;g5858;g6198;g6258;g7198;g7287;g8299
GO:0018912	e	1,4-dichlorobenzene metabolic process	2/577	4/8342	0.0261	1	biological_process	g6886;g7090
GO:0004065	e	arylsulfatase activity	2/577	4/8342	0.0261	1	molecular_function	g2658;g7834
GO:0046562	e	glucose oxidase activity	2/577	4/8342	0.0261	1	molecular_function	g1498;g8334
GO:0072490	e	toluene-containing compound metabolic process	2/577	4/8342	0.0261	1	biological_process	g6886;g7090
GO:0009448	e	gamma-aminobutyric acid metabolic process	2/577	4/8342	0.0261	1	biological_process	g4540;g5044
GO:0047979	e	hexose oxidase activity	2/577	4/8342	0.0261	1	molecular_function	g1498;g8334
GO:0019261	e	1,4-dichlorobenzene catabolic process	2/577	4/8342	0.0261	1	biological_process	g6886;g7090
GO:0097599	e	xylanase activity	2/577	4/8342	0.0261	1	molecular_function	g5859;g7288
GO:0044275	e	cellular carbohydrate catabolic process	4/577	17/8342	0.0262	1	biological_process	g14;g1557;g583;g6982
GO:0006865	e	amino acid transport	6/577	34/8342	0.0273	1	biological_process	g1512;g2422;g3969;g4548;g5389;g8069
GO:0009312	e	oligosaccharide biosynthetic process	3/577	10/8342	0.0274	1	biological_process	g4651;g7634;g7969
GO:0045493	e	xylan catabolic process	3/577	10/8342	0.0274	1	biological_process	g5859;g7287;g7288
GO:0045491	e	xylan metabolic process	3/577	10/8342	0.0274	1	biological_process	g5859;g7287;g7288
GO:0046351	e	disaccharide biosynthetic process	3/577	10/8342	0.0274	1	biological_process	g4651;g7634;g7969
GO:0005992	e	trehalose biosynthetic process	3/577	10/8342	0.0274	1	biological_process	g4651;g7634;g7969
GO:0051213	e	dioxygenase activity	10/577	70/8342	0.0279	1	molecular_function	g1338;g2929;g3065;g4586;g6886;g7001;g7090;g7719;g803;g935
GO:0044723	e	single-organism carbohydrate metabolic process	17/577	145/8342	0.0301	1	biological_process	g1007;g1064;g14;g1512;g1739;g222;g2605;g3090;g4651;g5791;g5801;g583;g5859;g609;g6729;g7634;g7969
GO:1901616	e	organic hydroxy compound catabolic process	3/577	11/8342	0.0358	1	biological_process	g3965;g5814;g583
GO:0010410	e	hemicellulose metabolic process	3/577	11/8342	0.0358	1	biological_process	g5859;g7287;g7288
GO:0006687	e	glycosphingolipid metabolic process	3/577	11/8342	0.0358	1	biological_process	g1739;g2658;g7834
GO:0006566	e	threonine metabolic process	9/577	61/8342	0.0358	1	biological_process	g1498;g1898;g2767;g3965;g5858;g6258;g6640;g7512;g8334
GO:1901575	e	organic substance catabolic process	33/577	336/8342	0.0368	1	biological_process	g1027;g1064;g1268;g14;g1557;g1739;g2483;g2605;g3047;g3090;g3277;g3410;g3965;g4084;g4481;g4540;g5044;g5115;g547;g5814;g583;g5859;g609;g6198;g6412;g6481;g6886;g6982;g7090;g7198;g7266;g7287;g7288
GO:0016052	e	carbohydrate catabolic process	12/577	94/8342	0.0372	1	biological_process	g1064;g14;g1557;g1739;g2483;g2605;g583;g5859;g6982;g7266;g7287;g7288
GO:0006979	e	response to oxidative stress	6/577	37/8342	0.0396	1	biological_process	g222;g4990;g5372;g5619;g6191;g8222
GO:0018874	e	benzoate metabolic process	5/577	28/8342	0.0406	1	biological_process	g1268;g3277;g547;g6886;g7090
GO:0004609	e	phosphatidylserine decarboxylase activity	2/577	5/8342	0.0415	1	molecular_function	g5858;g6258
GO:0008677	e	2-dehydropantoate 2-reductase activity	2/577	5/8342	0.0415	1	molecular_function	g2101;g2102
GO:0070469	e	respiratory chain	2/577	5/8342	0.0415	1	cellular_component	g399;g4630
GO:0008131	e	primary amine oxidase activity	2/577	5/8342	0.0415	1	molecular_function	g6036;g7298
GO:0006072	e	glycerol-3-phosphate metabolic process	2/577	5/8342	0.0415	1	biological_process	g3410;g4481
GO:0052646	e	alditol phosphate metabolic process	2/577	5/8342	0.0415	1	biological_process	g3410;g4481
GO:0009712	e	catechol-containing compound metabolic process	2/577	5/8342	0.0415	1	biological_process	g6886;g7090
GO:0006084	e	acetyl-CoA metabolic process	2/577	5/8342	0.0415	1	biological_process	g2605;g3753
GO:0006576	e	cellular biogenic amine metabolic process	10/577	77/8342	0.0424	1	biological_process	g1268;g131;g1401;g210;g242;g2555;g3050;g5372;g5786;g8222
GO:0015849	e	organic acid transport	6/577	38/8342	0.0444	1	biological_process	g1512;g2422;g3969;g4548;g5389;g8069
GO:0046942	e	carboxylic acid transport	6/577	38/8342	0.0444	1	biological_process	g1512;g2422;g3969;g4548;g5389;g8069
GO:0008150	e	biological_process	357/577	4825/8342	0.0444	1	biological_process	g1007;g1027;g1033;g104;g1064;g109;g1129;g123;g1258;g1268;g128;g1291;g1296;g131;g1338;g1359;g1378;g14;g140;g1401;g1410;g1426;g149;g1497;g1498;g1511;g1512;g1514;g1526;g1527;g1557;g156;g157;g1583;g1641;g1664;g1700;g1736;g1739;g1767;g1773;g1789;g1805;g1895;g1896;g1897;g1898;g19;g194;g1946;g1947;g202;g2057;g2058;g2062;g2063;g2066;g2090;g2093;g2097;g2098;g210;g2101;g2102;g2117;g2118;g2119;g2135;g2153;g…
GO:0006022	e	aminoglycan metabolic process	4/577	20/8342	0.0452	1	biological_process	g1027;g1739;g6481;g8202
GO:0034637	e	cellular carbohydrate biosynthetic process	4/577	20/8342	0.0452	1	biological_process	g222;g4651;g7634;g7969
GO:0007186	e	G-protein coupled receptor signaling pathway	3/577	12/8342	0.0453	1	biological_process	g6681;g7072;g7249
GO:0052689	e	carboxylic ester hydrolase activity	6/577	39/8342	0.0495	1	molecular_function	g3047;g4084;g6198;g7198;g7266;g7287

## Sheet: Sample84H_1M_vs_Sample84H_4M.DE
id	enrichment	description	ratio_in_study	ratio_in_pop	p_uncorrected	p_bonferroni	type	diff_genes
GO:0046906	e	tetrapyrrole binding	54/1733	105/8342	6.32e-11	1.45e-07	molecular_function	g1097;g1338;g15;g1805;g1842;g1882;g1883;g2064;g2078;g2093;g2101;g2102;g242;g2629;g2925;g3050;g3065;g3151;g3207;g328;g346;g3613;g399;g401;g4200;g4334;g4549;g4990;g5040;g5242;g5336;g5526;g5619;g5786;g5990;g616;g6529;g6984;g7181;g7246;g7247;g731;g7447;g7580;g7618;g7767;g7956;g8062;g8081;g8166;g8222;g8226;g8304;g878
GO:0020037	e	heme binding	54/1733	104/8342	1.31e-10	3e-07	molecular_function	g1097;g1338;g15;g1805;g1842;g1882;g1883;g2064;g2078;g2093;g2101;g2102;g242;g2629;g2925;g3050;g3065;g3151;g3207;g328;g346;g3613;g399;g401;g4200;g4334;g4549;g4990;g5040;g5242;g5336;g5526;g5619;g5786;g5990;g616;g6529;g6984;g7181;g7246;g7247;g731;g7447;g7580;g7618;g7767;g7956;g8062;g8081;g8166;g8222;g8226;g8304;g878
GO:0055085	e	transmembrane transport	163/1733	492/8342	3.11e-10	7.14e-07	biological_process	g1028;g1033;g1047;g109;g123;g1261;g128;g1296;g1490;g150;g1508;g1512;g1518;g1526;g1560;g1583;g1618;g1659;g1724;g175;g1754;g1755;g1894;g1946;g1947;g1997;g2085;g2098;g2105;g2118;g2203;g224;g2266;g2361;g2379;g2422;g243;g2432;g2434;g2692;g2755;g2881;g2917;g3034;g3069;g3097;g321;g3241;g3257;g3346;g336;g3401;g342;g3441;g3722;g3794;g3843;g3894;g3902;g3960;g3969;g3976;g3980;g4001;g4115;g4136;g4189;g4255;g…
GO:0055114	e	oxidation-reduction process	263/1733	820/8342	3.26e-10	7.49e-07	biological_process	g1029;g1031;g107;g1070;g108;g1083;g1097;g110;g1186;g1258;g129;g1338;g140;g1448;g149;g15;g1511;g1514;g1536;g156;g1663;g1694;g1718;g1736;g1773;g1779;g1781;g1805;g1842;g1882;g1883;g1896;g1897;g194;g1978;g2;g2023;g203;g2062;g2063;g2064;g2066;g2067;g2078;g209;g2093;g2097;g2101;g2102;g2106;g2129;g222;g2419;g242;g247;g2535;g2541;g2544;g258;g2629;g2636;g2650;g2681;g2745;g2767;g278;g279;g280;g2804;g281;g2…
GO:0016491	e	oxidoreductase activity	273/1733	860/8342	4.29e-10	9.84e-07	molecular_function	g1029;g1031;g107;g1070;g108;g1083;g1097;g110;g1186;g1192;g1258;g129;g1338;g140;g1448;g149;g15;g1511;g1514;g1536;g156;g1663;g1694;g1718;g1736;g1773;g1779;g1781;g1805;g1831;g1842;g1882;g1883;g1896;g1897;g194;g1978;g2;g2023;g203;g2062;g2063;g2064;g2066;g2067;g2078;g209;g2093;g2097;g2101;g2102;g2106;g2129;g222;g2374;g2419;g242;g247;g2535;g2541;g2544;g258;g2629;g2636;g2650;g2681;g2745;g2767;g278;g279;…
GO:0044710	e	single-organism metabolic process	449/1733	1709/8342	1.32e-09	3.03e-06	biological_process	g1007;g1026;g1029;g1031;g1064;g107;g1070;g108;g1083;g1097;g110;g1186;g1192;g1258;g126;g1268;g129;g1297;g1298;g131;g1321;g1338;g1341;g1346;g14;g140;g1416;g1426;g1443;g1444;g1445;g1448;g1461;g1469;g149;g15;g1511;g1512;g1514;g1527;g1536;g156;g1585;g1616;g1624;g1663;g1666;g1694;g1718;g1736;g1739;g1760;g1773;g1779;g1781;g1805;g1831;g1842;g1882;g1883;g1896;g1897;g1925;g194;g1978;g2;g2020;g2023;g203;g20…
GO:0044699	e	single-organism process	511/1733	2001/8342	3.92e-09	8.99e-06	biological_process	g1007;g1026;g1028;g1029;g1031;g1064;g107;g1070;g108;g1083;g1097;g110;g1186;g1192;g1258;g126;g1268;g129;g1297;g1298;g1299;g131;g1321;g1338;g1341;g1346;g14;g140;g1416;g1426;g1443;g1444;g1445;g1448;g1461;g1469;g149;g15;g1511;g1512;g1514;g1518;g1526;g1527;g1536;g156;g1583;g1585;g1616;g1624;g1657;g1663;g1666;g1694;g1718;g1736;g1739;g175;g1760;g1773;g1779;g1781;g1805;g1831;g1840;g1842;g1882;g1883;g1896…
GO:0031224	e	intrinsic component of membrane	201/1733	692/8342	6.58e-08	0.000151	cellular_component	g1026;g1028;g1033;g1047;g105;g109;g1165;g123;g1261;g128;g1296;g1490;g150;g1508;g1512;g1518;g1526;g1560;g1583;g1618;g1659;g1724;g175;g1754;g1755;g1894;g1946;g1947;g1997;g202;g2085;g2098;g2105;g2118;g2203;g224;g2266;g2361;g2379;g241;g2422;g243;g2434;g2586;g2662;g2692;g2755;g2881;g2884;g2917;g3034;g3069;g3097;g3241;g3257;g3346;g336;g3401;g342;g3441;g3473;g3598;g3722;g3781;g3794;g3843;g3894;g3902;g39…
GO:0016021	e	integral component of membrane	198/1733	683/8342	9.62e-08	0.000221	cellular_component	g1026;g1028;g1033;g1047;g105;g109;g1165;g123;g1261;g128;g1296;g1490;g150;g1508;g1512;g1518;g1526;g1560;g1583;g1618;g1659;g1724;g175;g1754;g1755;g1894;g1946;g1947;g1997;g202;g2085;g2098;g2105;g2118;g2203;g224;g2266;g2361;g2379;g241;g2422;g243;g2434;g2662;g2692;g2755;g2881;g2884;g2917;g3034;g3069;g3097;g3241;g3257;g3346;g336;g3401;g342;g3441;g3473;g3598;g3722;g3781;g3794;g3843;g3894;g3902;g3937;g39…
GO:0004553	e	hydrolase activity, hydrolyzing O-glycosyl compounds	45/1733	104/8342	2.58e-07	0.000591	molecular_function	g1007;g1027;g1306;g14;g1512;g1557;g1653;g1666;g1739;g1867;g19;g2483;g2673;g3071;g3112;g3175;g339;g3883;g3934;g4111;g43;g5006;g5307;g5385;g5678;g5801;g5859;g6182;g6213;g6227;g6481;g6682;g6727;g6982;g7110;g7121;g7288;g7351;g7536;g7611;g8053;g8145;g8242;g884;g916
GO:0016705	e	oxidoreductase activity, acting on paired donors, with incorporation or reduction of molecular oxygen	44/1733	105/8342	7.32e-07	0.00168	molecular_function	g108;g1097;g1779;g1805;g1842;g2;g2064;g2078;g2093;g2541;g280;g3151;g3207;g328;g346;g4200;g4334;g4525;g4624;g4897;g4990;g5040;g5242;g5526;g5619;g5805;g5811;g5990;g6458;g6984;g7181;g7248;g731;g7447;g7580;g7618;g7767;g7874;g8062;g8081;g8166;g8226;g878;g951
GO:0016798	e	hydrolase activity, acting on glycosyl bonds	48/1733	117/8342	7.55e-07	0.00173	molecular_function	g1001;g1007;g1027;g1306;g14;g1410;g1512;g1557;g1653;g1666;g1739;g1867;g19;g2483;g2673;g3071;g3112;g3175;g339;g3883;g3934;g4111;g43;g5006;g5307;g5385;g5678;g5801;g5859;g6182;g6213;g6227;g6481;g6682;g6727;g6982;g7110;g7121;g7288;g7351;g7536;g7611;g7773;g8053;g8145;g8242;g884;g916
GO:0022857	e	transmembrane transporter activity	96/1733	292/8342	9.99e-07	0.00229	molecular_function	g1028;g123;g1296;g1512;g1518;g1526;g1560;g1583;g1659;g1724;g175;g1840;g1946;g2057;g2085;g2105;g2118;g2203;g224;g2266;g2331;g2361;g2422;g243;g2432;g2692;g2881;g3034;g3241;g3257;g336;g3401;g342;g3794;g3969;g3976;g3980;g4136;g4189;g4259;g4470;g4512;g4548;g4579;g4604;g4636;g4936;g4982;g4984;g5059;g5069;g5088;g5126;g5210;g5303;g5358;g5363;g5389;g5400;g5671;g5800;g5815;g5860;g5935;g5948;g6310;g6338;g63…
GO:0004497	e	monooxygenase activity	38/1733	86/8342	1.27e-06	0.00292	molecular_function	g108;g1097;g140;g1773;g1805;g1842;g2078;g2093;g280;g281;g3151;g3207;g3276;g328;g346;g3955;g4200;g4334;g4525;g4575;g4624;g5040;g5526;g5805;g5990;g6199;g6593;g6984;g7181;g731;g7447;g7580;g7767;g8062;g8081;g8166;g8226;g878
GO:0005506	e	iron ion binding	47/1733	117/8342	1.5e-06	0.00345	molecular_function	g1097;g1779;g1805;g1842;g1883;g2;g2064;g2078;g2093;g2541;g3085;g3151;g3207;g328;g346;g399;g4200;g4334;g4897;g4990;g5040;g5242;g5526;g5619;g5798;g5799;g5807;g5811;g583;g5990;g6458;g6886;g6984;g7090;g7181;g731;g7447;g7580;g7618;g7767;g7874;g8044;g8062;g8081;g8166;g8226;g878
GO:0005975	e	carbohydrate metabolic process	92/1733	283/8342	3.12e-06	0.00716	biological_process	g1007;g1027;g1029;g1064;g1306;g14;g1443;g1444;g1445;g1512;g1557;g1653;g1739;g1831;g1867;g19;g2110;g222;g2321;g247;g2483;g251;g2605;g2636;g2673;g2734;g3030;g3071;g3090;g3112;g339;g3410;g3455;g3839;g3842;g3883;g3934;g4106;g4111;g4256;g43;g4340;g4364;g4438;g4536;g4610;g4651;g4680;g4712;g4891;g5006;g5307;g5324;g5385;g5678;g5791;g5801;g583;g5859;g5907;g6021;g609;g610;g6182;g621;g6213;g6227;g6316;g6353…
GO:0005215	e	transporter activity	108/1733	346/8342	3.57e-06	0.0082	molecular_function	g1028;g105;g1165;g123;g1296;g1512;g1518;g1526;g1560;g1583;g1659;g1724;g175;g1840;g1894;g1946;g1947;g2057;g2085;g2105;g2118;g2203;g224;g2266;g2331;g2361;g2422;g243;g2432;g2662;g2692;g2881;g2917;g3034;g3241;g3257;g336;g3401;g342;g3794;g3969;g3976;g3980;g4136;g4189;g4259;g4470;g4503;g4512;g4526;g4548;g4579;g4604;g4636;g4936;g4982;g4984;g5059;g5069;g5088;g5126;g5210;g5303;g5358;g5363;g5389;g5400;g567…
GO:0030684	e	preribosome	10/1733	12/8342	6.39e-06	0.0147	cellular_component	g1476;g1668;g3013;g3174;g3356;g3854;g4082;g5568;g5936;g778
GO:0043446	e	cellular alkane metabolic process	11/1733	15/8342	1.79e-05	0.0411	biological_process	g15;g242;g3050;g401;g4199;g5786;g5923;g815;g8222;g8304;g945
GO:0015947	e	methane metabolic process	11/1733	15/8342	1.79e-05	0.0411	biological_process	g15;g242;g3050;g401;g4199;g5786;g5923;g815;g8222;g8304;g945
GO:0009056	e	catabolic process	107/1733	359/8342	3.46e-05	0.0795	biological_process	g1027;g1064;g1225;g126;g1268;g1306;g14;g1461;g15;g1557;g1739;g1779;g1840;g1925;g2023;g209;g2110;g241;g242;g2483;g251;g2549;g2605;g2636;g2652;g2903;g292;g3050;g3071;g3090;g3175;g3277;g3410;g3455;g3674;g3721;g3934;g3965;g4084;g4233;g4234;g4235;g4236;g4256;g43;g4364;g4438;g4454;g454;g4540;g4680;g4698;g4799;g4897;g4915;g4951;g5044;g5115;g5116;g5164;g5171;g5335;g5336;g5390;g5410;g5462;g547;g5756;g5786…
GO:0022891	e	substrate-specific transmembrane transporter activity	77/1733	241/8342	3.55e-05	0.0814	molecular_function	g1028;g123;g1296;g1512;g1518;g1526;g1560;g1583;g1659;g175;g1840;g1946;g2057;g2085;g2105;g2118;g2266;g2331;g2361;g2422;g243;g2432;g2881;g3241;g3257;g336;g3794;g3969;g3976;g3980;g4136;g4189;g4259;g4470;g4512;g4548;g4579;g4604;g4636;g4936;g4984;g5059;g5069;g5088;g5210;g5303;g5358;g5363;g5389;g5400;g5671;g5815;g5948;g6310;g6348;g6901;g6919;g7012;g7098;g736;g7398;g7417;g7494;g7568;g7610;g7739;g7744;g7…
GO:0098656	e	anion transmembrane transport	19/1733	37/8342	3.58e-05	0.0821	biological_process	g1512;g1518;g175;g2105;g2266;g2422;g3257;g3794;g3969;g3976;g4548;g5389;g5400;g6310;g7568;g8014;g8069;g8088;g938
GO:0048037	e	cofactor binding	88/1733	287/8342	5.84e-05	0.134	molecular_function	g1029;g1070;g108;g1192;g1258;g1416;g1536;g1694;g1736;g1785;g1831;g1882;g1883;g1990;g2063;g2101;g2102;g2129;g2205;g222;g2264;g2374;g2535;g2553;g2555;g2629;g2681;g2767;g2925;g3022;g3410;g3467;g3615;g3622;g3721;g3972;g408;g4216;g4369;g4438;g4476;g4540;g4545;g4606;g4624;g4817;g4853;g4933;g5044;g515;g5335;g5395;g5410;g5807;g5867;g593;g6036;g609;g6130;g6207;g6316;g6353;g6371;g6479;g6529;g655;g6604;g664…
GO:0016684	e	oxidoreductase activity, acting on peroxide as acceptor	15/1733	27/8342	7.38e-05	0.169	molecular_function	g15;g242;g3050;g3613;g401;g4549;g4990;g5242;g5619;g5786;g6191;g6905;g7182;g8222;g8304
GO:0015171	e	amino acid transmembrane transporter activity	16/1733	30/8342	8.22e-05	0.189	molecular_function	g1512;g1518;g2105;g2266;g2422;g3794;g3969;g3976;g4548;g5389;g5400;g7568;g8014;g8069;g8088;g938
GO:0003333	e	amino acid transmembrane transport	16/1733	30/8342	8.22e-05	0.189	biological_process	g1512;g1518;g2105;g2266;g2422;g3794;g3969;g3976;g4548;g5389;g5400;g7568;g8014;g8069;g8088;g938
GO:0008514	e	organic anion transmembrane transporter activity	17/1733	33/8342	8.76e-05	0.201	molecular_function	g1512;g1518;g2105;g2266;g2422;g3794;g3969;g3976;g4548;g5389;g5400;g7012;g7568;g8014;g8069;g8088;g938
GO:0005342	e	organic acid transmembrane transporter activity	17/1733	33/8342	8.76e-05	0.201	molecular_function	g1512;g1518;g2105;g2266;g2422;g3794;g3969;g3976;g4548;g5389;g5400;g7012;g7568;g8014;g8069;g8088;g938
GO:0006804	e	obsolete peroxidase reaction	14/1733	25/8342	0.000115	0.263	biological_process	g15;g242;g3050;g3613;g401;g4549;g4990;g5242;g5619;g5786;g6191;g7182;g8222;g8304
GO:0004601	e	peroxidase activity	14/1733	25/8342	0.000115	0.263	molecular_function	g15;g242;g3050;g3613;g401;g4549;g4990;g5242;g5619;g5786;g6191;g7182;g8222;g8304
GO:0008509	e	anion transmembrane transporter activity	22/1733	49/8342	0.000132	0.303	molecular_function	g1512;g1518;g175;g2105;g2266;g2422;g2432;g3257;g3794;g3969;g3976;g4512;g4548;g5389;g5400;g6310;g7012;g7568;g8014;g8069;g8088;g938
GO:1905039	e	carboxylic acid transmembrane transport	16/1733	31/8342	0.000137	0.315	biological_process	g1512;g1518;g2105;g2266;g2422;g3794;g3969;g3976;g4548;g5389;g5400;g7568;g8014;g8069;g8088;g938
GO:1903825	e	organic acid transmembrane transport	16/1733	31/8342	0.000137	0.315	biological_process	g1512;g1518;g2105;g2266;g2422;g3794;g3969;g3976;g4548;g5389;g5400;g7568;g8014;g8069;g8088;g938
GO:0006865	e	amino acid transport	17/1733	34/8342	0.000142	0.325	biological_process	g1512;g1518;g2105;g2266;g2422;g3794;g3969;g3976;g4548;g5171;g5389;g5400;g7568;g8014;g8069;g8088;g938
GO:0046943	e	carboxylic acid transmembrane transporter activity	16/1733	32/8342	0.000222	0.51	molecular_function	g1512;g1518;g2105;g2266;g2422;g3794;g3969;g3976;g4548;g5389;g5400;g7568;g8014;g8069;g8088;g938
GO:0042178	e	xenobiotic catabolic process	12/1733	21/8342	0.000278	0.637	biological_process	g1268;g2636;g3277;g4233;g4234;g4799;g5390;g5462;g5805;g6886;g7090;g86
GO:0032040	e	small-subunit processome	6/1733	7/8342	0.00046	1	cellular_component	g1476;g1668;g3174;g3356;g3854;g4082
GO:0042438	e	melanin biosynthetic process	6/1733	7/8342	0.00046	1	biological_process	g3672;g3674;g3675;g3676;g4235;g4236
GO:0022892	e	substrate-specific transporter activity	78/1733	262/8342	0.00047	1	molecular_function	g1028;g123;g1296;g1512;g1518;g1526;g1560;g1583;g1659;g175;g1840;g1946;g2057;g2085;g2105;g2118;g2266;g2331;g2361;g2422;g243;g2432;g2881;g3241;g3257;g336;g3794;g3969;g3976;g3980;g4136;g4189;g4259;g4470;g4512;g4548;g4579;g4604;g4636;g4936;g4984;g5059;g5069;g5088;g5210;g5303;g5358;g5363;g5389;g5400;g5671;g5815;g5948;g6310;g6348;g6654;g6901;g6919;g7012;g7098;g736;g7398;g7417;g7494;g7568;g7610;g7739;g7…
GO:0006364	e	rRNA processing	19/1733	43/8342	0.000491	1	biological_process	g1476;g1668;g172;g2733;g2772;g3013;g3174;g3467;g3627;g4524;g4665;g4887;g5159;g5568;g5936;g6321;g6955;g778;g8221
GO:0006820	e	anion transport	25/1733	63/8342	0.000521	1	biological_process	g1512;g1518;g175;g2105;g2266;g2422;g2432;g3257;g3794;g3969;g3976;g4512;g4548;g5171;g5303;g5389;g5400;g6310;g7012;g7568;g8014;g8069;g8088;g8275;g938
GO:1901615	e	organic hydroxy compound metabolic process	37/1733	105/8342	0.000595	1	biological_process	g1070;g1192;g2023;g222;g247;g251;g2636;g2658;g2767;g292;g3197;g3615;g3672;g3674;g3675;g3676;g3965;g4235;g4236;g4364;g4536;g4606;g4646;g583;g6021;g610;g6353;g6640;g6886;g7090;g7432;g7512;g7951;g8222;g8258;g8334;g926
GO:0044282	e	small molecule catabolic process	38/1733	109/8342	0.000751	1	biological_process	g1064;g126;g1925;g2023;g209;g2110;g2549;g2636;g292;g3090;g3277;g3721;g3965;g4234;g4235;g4236;g4364;g454;g4540;g4680;g4698;g4799;g5044;g5115;g5116;g5335;g5336;g547;g583;g5943;g609;g6130;g6726;g6732;g6942;g7246;g7432;g7951
GO:0018958	e	phenol-containing compound metabolic process	11/1733	20/8342	0.00078	1	biological_process	g2658;g3672;g3674;g3675;g3676;g4235;g4236;g4646;g6886;g7090;g7432
GO:0044248	e	cellular catabolic process	77/1733	261/8342	0.000808	1	biological_process	g1027;g1225;g126;g1268;g1306;g14;g1461;g15;g1557;g1779;g1840;g1925;g2023;g209;g2110;g241;g242;g2549;g2636;g2652;g2903;g292;g3050;g3071;g3090;g3175;g3277;g3721;g3965;g4233;g4234;g4235;g4236;g4364;g4454;g454;g4540;g4680;g4698;g4799;g4897;g4951;g5044;g5115;g5116;g5164;g5171;g5335;g5336;g5390;g5410;g5462;g547;g5756;g5786;g5805;g583;g5943;g609;g6130;g6481;g6726;g6727;g6732;g6886;g6942;g6982;g7090;g724…
GO:0016614	e	oxidoreductase activity, acting on CH-OH group of donors	52/1733	164/8342	0.000885	1	molecular_function	g1029;g1192;g1718;g1831;g2063;g2101;g2102;g2129;g222;g2374;g247;g2535;g2745;g2767;g3022;g3049;g3410;g3615;g3675;g3965;g4017;g408;g4199;g4536;g4545;g4565;g4606;g4610;g5791;g5807;g593;g6055;g6056;g609;g6316;g6529;g6640;g6729;g6864;g7187;g7255;g7402;g7512;g7951;g7956;g7975;g8057;g8258;g8265;g8334;g86;g949
GO:0015849	e	organic acid transport	17/1733	38/8342	0.000885	1	biological_process	g1512;g1518;g2105;g2266;g2422;g3794;g3969;g3976;g4548;g5171;g5389;g5400;g7568;g8014;g8069;g8088;g938
GO:0046942	e	carboxylic acid transport	17/1733	38/8342	0.000885	1	biological_process	g1512;g1518;g2105;g2266;g2422;g3794;g3969;g3976;g4548;g5171;g5389;g5400;g7568;g8014;g8069;g8088;g938
GO:0003824	e	catalytic activity	719/1733	3173/8342	0.000939	1	molecular_function	g1001;g1007;g1026;g1027;g1029;g1031;g107;g1070;g108;g1083;g1097;g1098;g110;g1118;g1186;g1192;g1225;g1258;g126;g1268;g129;g1297;g1298;g1299;g1306;g131;g1321;g1330;g1338;g1341;g1346;g1359;g1376;g1378;g1386;g14;g140;g1410;g1416;g1420;g1426;g1443;g1444;g1445;g1448;g1461;g1469;g1488;g149;g1495;g15;g1500;g1511;g1512;g1514;g1527;g1536;g1554;g1557;g156;g1585;g161;g1616;g1624;g1653;g1663;g1666;g1694;g1713…
GO:1901575	e	organic substance catabolic process	95/1733	336/8342	0.000943	1	biological_process	g1027;g1064;g126;g1268;g1306;g14;g1461;g1557;g1739;g1840;g1925;g2023;g209;g2110;g241;g2483;g251;g2549;g2605;g2636;g2652;g292;g3071;g3090;g3277;g3410;g3455;g3674;g3721;g3934;g3965;g4084;g4233;g4234;g4235;g4236;g4256;g43;g4364;g4438;g4454;g454;g4540;g4680;g4698;g4799;g4915;g4951;g5044;g5115;g5116;g5335;g5336;g5390;g5410;g5462;g547;g5756;g5805;g583;g5859;g5943;g6021;g609;g610;g6130;g6213;g6227;g6353…
GO:1901361	e	organic cyclic compound catabolic process	29/1733	78/8342	0.00103	1	biological_process	g1268;g1461;g1840;g2023;g209;g2636;g3277;g4233;g4234;g4235;g4236;g4799;g4951;g5116;g5335;g5336;g5390;g5410;g5462;g5805;g5943;g6732;g6886;g7090;g7246;g7432;g7804;g86;g914
GO:0016072	e	rRNA metabolic process	19/1733	44/8342	0.00107	1	biological_process	g1476;g1668;g172;g2733;g2772;g3013;g3174;g3467;g3627;g4524;g4665;g4887;g5159;g5568;g5936;g6321;g6955;g778;g8221
GO:0004096	e	catalase activity	7/1733	10/8342	0.00109	1	molecular_function	g15;g242;g3050;g401;g5786;g8222;g8304
GO:0046189	e	phenol-containing compound biosynthetic process	7/1733	10/8342	0.00109	1	biological_process	g3672;g3674;g3675;g3676;g4235;g4236;g4646
GO:0046395	e	carboxylic acid catabolic process	33/1733	95/8342	0.00137	1	biological_process	g126;g1925;g2023;g2110;g2549;g2636;g292;g3090;g3277;g3721;g3965;g4234;g4235;g4236;g4364;g454;g4540;g4680;g4698;g5044;g5115;g5116;g5335;g5336;g547;g5943;g609;g6130;g6726;g6732;g6942;g7246;g7432
GO:0016054	e	organic acid catabolic process	33/1733	95/8342	0.00137	1	biological_process	g126;g1925;g2023;g2110;g2549;g2636;g292;g3090;g3277;g3721;g3965;g4234;g4235;g4236;g4364;g454;g4540;g4680;g4698;g5044;g5115;g5116;g5335;g5336;g547;g5943;g609;g6130;g6726;g6732;g6942;g7246;g7432
GO:0044425	e	membrane part	206/1733	819/8342	0.00148	1	cellular_component	g1026;g1028;g1033;g1047;g105;g109;g1165;g123;g1261;g128;g1296;g1490;g150;g1508;g1512;g1518;g1526;g1560;g1583;g1618;g1659;g1724;g175;g1754;g1755;g1894;g1946;g1947;g1997;g202;g2085;g2098;g2105;g2118;g2203;g2233;g224;g2266;g2361;g2368;g2379;g241;g2422;g243;g2434;g2586;g2662;g2692;g2755;g2881;g2884;g2903;g2917;g3034;g3069;g3097;g3241;g3257;g3346;g336;g3401;g342;g3441;g3473;g3598;g3722;g3781;g3794;g38…
GO:0006582	e	melanin metabolic process	6/1733	8/8342	0.00151	1	biological_process	g3672;g3674;g3675;g3676;g4235;g4236
GO:0015923	e	mannosidase activity	8/1733	13/8342	0.00161	1	molecular_function	g1306;g1666;g2483;g43;g5307;g6227;g8242;g884
GO:0019439	e	aromatic compound catabolic process	24/1733	64/8342	0.00181	1	biological_process	g1268;g1461;g1779;g209;g3277;g4233;g4234;g4235;g4236;g4799;g4897;g5116;g5335;g5336;g5390;g5410;g5462;g5805;g6886;g7090;g7246;g7432;g7804;g914
GO:0015711	e	organic anion transport	19/1733	47/8342	0.00189	1	biological_process	g1512;g1518;g2105;g2266;g2422;g3794;g3969;g3976;g4548;g5171;g5303;g5389;g5400;g7012;g7568;g8014;g8069;g8088;g938
GO:0006805	e	xenobiotic metabolic process	15/1733	34/8342	0.00215	1	biological_process	g1268;g2636;g3277;g4233;g4234;g4799;g5390;g5462;g5805;g6332;g6886;g7090;g711;g746;g86
GO:1901565	e	organonitrogen compound catabolic process	40/1733	122/8342	0.00218	1	biological_process	g1027;g126;g1739;g1840;g209;g2636;g292;g3090;g3277;g3721;g3965;g4234;g4235;g4236;g4364;g4454;g454;g4540;g4698;g4799;g4951;g5044;g5335;g5336;g5410;g547;g5943;g609;g6130;g6481;g6726;g6732;g6886;g6942;g7090;g7246;g7351;g8024;g86;g914
GO:0044712	e	single-organism catabolic process	59/1733	199/8342	0.00257	1	biological_process	g1064;g126;g14;g1461;g1925;g2023;g209;g2110;g241;g251;g2549;g2605;g2636;g2652;g2903;g292;g3090;g3277;g3674;g3721;g3965;g4084;g4234;g4235;g4236;g4256;g4364;g4438;g454;g4540;g4680;g4698;g4799;g4915;g5044;g5115;g5116;g5335;g5336;g5410;g547;g5756;g583;g5943;g6021;g609;g610;g6130;g6353;g6726;g6732;g6942;g7198;g7246;g7432;g7774;g7951;g812;g86
GO:0042537	e	benzene-containing compound metabolic process	20/1733	51/8342	0.00265	1	biological_process	g1268;g292;g3277;g3675;g3676;g4233;g4234;g4646;g5116;g5335;g5336;g5390;g5462;g547;g5805;g6054;g6886;g7090;g7246;g7432
GO:0008643	e	carbohydrate transport	14/1733	31/8342	0.00266	1	biological_process	g1028;g1526;g1583;g2085;g243;g3097;g4189;g4470;g4636;g5059;g5948;g6901;g6919;g7043
GO:0016209	e	antioxidant activity	15/1733	35/8342	0.00283	1	molecular_function	g15;g242;g3050;g3613;g401;g4549;g4990;g5242;g5619;g5786;g6191;g6905;g7182;g8222;g8304
GO:0050660	e	flavin adenine dinucleotide binding	34/1733	102/8342	0.00295	1	molecular_function	g108;g1192;g1536;g1694;g1882;g1883;g2063;g2129;g2205;g2535;g2629;g2681;g2767;g3022;g3615;g408;g4606;g4624;g4853;g5807;g593;g6130;g6604;g6640;g6864;g7255;g7349;g7350;g7402;g7512;g806;g8258;g8265;g8334
GO:0005730	e	nucleolus	24/1733	66/8342	0.00336	1	cellular_component	g1321;g1346;g172;g1760;g2227;g2562;g2963;g3013;g3467;g4094;g4318;g4524;g4665;g4850;g4887;g5159;g5568;g6301;g6654;g6839;g6955;g778;g8132;g8221
GO:0006561	e	proline biosynthetic process	6/1733	9/8342	0.00374	1	biological_process	g4027;g4547;g5943;g6731;g6732;g800
GO:0005976	e	polysaccharide metabolic process	24/1733	67/8342	0.00384	1	biological_process	g1007;g1306;g14;g1444;g1445;g1512;g1557;g1739;g2321;g3071;g3455;g5801;g5859;g6021;g6213;g6316;g6682;g6727;g6982;g7121;g7266;g7288;g8035;g916
GO:0051213	e	dioxygenase activity	25/1733	70/8342	0.00433	1	molecular_function	g1338;g1448;g1779;g2;g2023;g2541;g3065;g3085;g3955;g4234;g4236;g4586;g4897;g5063;g5242;g5336;g5811;g6200;g6886;g7001;g7090;g7246;g7248;g7874;g951
GO:0006810	e	transport	199/1733	806/8342	0.0046	1	biological_process	g1028;g1033;g1047;g105;g109;g1165;g1225;g123;g1261;g128;g1296;g1341;g1490;g150;g1508;g1512;g1518;g1526;g1560;g1583;g1618;g1657;g1659;g1724;g175;g1754;g1755;g1840;g1894;g1946;g1947;g1997;g202;g2057;g2085;g2098;g2105;g2118;g2203;g2227;g224;g2266;g2331;g2361;g2379;g2422;g243;g2432;g2434;g2586;g2662;g2692;g2755;g2881;g289;g2903;g2917;g3034;g3069;g3097;g321;g3241;g3257;g3346;g336;g3401;g342;g3441;g372…
GO:0004559	e	alpha-mannosidase activity	7/1733	12/8342	0.00486	1	molecular_function	g1666;g2483;g43;g5307;g6227;g8242;g884
GO:1901617	e	organic hydroxy compound biosynthetic process	16/1733	40/8342	0.0053	1	biological_process	g1070;g222;g2636;g292;g3197;g3672;g3674;g3675;g3676;g3965;g4235;g4236;g4646;g6021;g6353;g8222
GO:0051234	e	establishment of localization	199/1733	809/8342	0.0054	1	biological_process	g1028;g1033;g1047;g105;g109;g1165;g1225;g123;g1261;g128;g1296;g1341;g1490;g150;g1508;g1512;g1518;g1526;g1560;g1583;g1618;g1657;g1659;g1724;g175;g1754;g1755;g1840;g1894;g1946;g1947;g1997;g202;g2057;g2085;g2098;g2105;g2118;g2203;g2227;g224;g2266;g2331;g2361;g2379;g2422;g243;g2432;g2434;g2586;g2662;g2692;g2755;g2881;g289;g2903;g2917;g3034;g3069;g3097;g321;g3241;g3257;g3346;g336;g3401;g342;g3441;g372…
GO:0016616	e	oxidoreductase activity, acting on the CH-OH group of donors, NAD or NADP as acceptor	41/1733	133/8342	0.00669	1	molecular_function	g1029;g1718;g1831;g2063;g2101;g2102;g2129;g222;g2374;g247;g2535;g2745;g3022;g3049;g3410;g3675;g3965;g4017;g408;g4199;g4536;g4545;g4565;g4610;g5791;g5807;g593;g6055;g6056;g609;g6316;g6729;g6864;g7187;g7255;g7402;g7951;g8057;g8265;g86;g949
GO:0016052	e	carbohydrate catabolic process	31/1733	94/8342	0.0067	1	biological_process	g1064;g1306;g14;g1557;g1739;g2483;g251;g2605;g2636;g3071;g3455;g4256;g43;g4438;g583;g5859;g6021;g610;g6213;g6227;g6353;g6682;g6727;g6982;g7121;g7266;g7288;g8035;g8242;g86;g916
GO:0006073	e	cellular glucan metabolic process	15/1733	37/8342	0.00674	1	biological_process	g1007;g14;g1444;g1445;g1512;g2321;g3071;g5801;g5859;g6021;g6316;g6682;g6727;g6982;g7121
GO:0044262	e	cellular carbohydrate metabolic process	33/1733	103/8342	0.00684	1	biological_process	g1007;g1306;g14;g1443;g1444;g1445;g1512;g1557;g1831;g2110;g222;g2321;g247;g251;g3071;g4364;g4536;g4651;g4680;g5801;g583;g5859;g6021;g609;g610;g6316;g6682;g6727;g6729;g6982;g7121;g7490;g866
GO:0008422	e	beta-glucosidase activity	6/1733	10/8342	0.00771	1	molecular_function	g1557;g1867;g3071;g6682;g6727;g6982
GO:0043605	e	cellular amide catabolic process	6/1733	10/8342	0.00771	1	biological_process	g1840;g4799;g4951;g5044;g86;g914
GO:0019694	e	alkanesulfonate metabolic process	4/1733	5/8342	0.00775	1	biological_process	g3085;g4540;g4686;g580
GO:0004185	e	serine-type carboxypeptidase activity	4/1733	5/8342	0.00775	1	molecular_function	g3844;g4551;g4983;g5026
GO:0019530	e	taurine metabolic process	4/1733	5/8342	0.00775	1	biological_process	g3085;g4540;g4686;g580
GO:0042744	e	hydrogen peroxide catabolic process	4/1733	5/8342	0.00775	1	biological_process	g15;g242;g3050;g5786
GO:0042743	e	hydrogen peroxide metabolic process	4/1733	5/8342	0.00775	1	biological_process	g15;g242;g3050;g5786
GO:0008131	e	primary amine oxidase activity	4/1733	5/8342	0.00775	1	molecular_function	g6036;g7277;g7298;g8176
GO:0070008	e	serine-type exopeptidase activity	4/1733	5/8342	0.00775	1	molecular_function	g3844;g4551;g4983;g5026
GO:0044042	e	glucan metabolic process	15/1733	38/8342	0.00802	1	biological_process	g1007;g14;g1444;g1445;g1512;g2321;g3071;g5801;g5859;g6021;g6316;g6682;g6727;g6982;g7121
GO:0006040	e	amino sugar metabolic process	19/1733	51/8342	0.00818	1	biological_process	g1027;g161;g2063;g2129;g2535;g2734;g3022;g3839;g3842;g3934;g408;g4471;g5807;g593;g6864;g7255;g7351;g7402;g8265
GO:0051179	e	localization	201/1733	825/8342	0.0087	1	biological_process	g1028;g1033;g1047;g105;g109;g1165;g1225;g123;g1261;g128;g1296;g1341;g1490;g150;g1508;g1512;g1518;g1526;g1560;g1583;g1618;g1657;g1659;g1724;g175;g1754;g1755;g1840;g1894;g1946;g1947;g1997;g202;g2057;g2085;g2098;g2105;g2118;g2203;g2227;g224;g2266;g2331;g2337;g2361;g2379;g2422;g243;g2432;g2434;g2586;g2662;g2692;g2755;g2881;g289;g2903;g2917;g3034;g3069;g3097;g321;g3241;g3257;g3346;g336;g3401;g342;g344…
GO:0016702	e	oxidoreductase activity, acting on single donors with incorporation of molecular oxygen, incorporation of two atoms of oxygen	8/1733	16/8342	0.00883	1	molecular_function	g3085;g4234;g4236;g5242;g5336;g6886;g7090;g7246
GO:0006572	e	tyrosine catabolic process	3/1733	3/8342	0.00895	1	biological_process	g4234;g4235;g4236
GO:0035835	e	indole alkaloid biosynthetic process	3/1733	3/8342	0.00895	1	biological_process	g4646;g6983;g8222
GO:0035834	e	indole alkaloid metabolic process	3/1733	3/8342	0.00895	1	biological_process	g4646;g6983;g8222
GO:0052861	e	glucan endo-1,3-beta-glucanase activity, C-3 substituted reducing group	3/1733	3/8342	0.00895	1	molecular_function	g3175;g6182;g7611
GO:0006044	e	N-acetylglucosamine metabolic process	3/1733	3/8342	0.00895	1	biological_process	g3839;g3842;g3934
GO:0004735	e	pyrroline-5-carboxylate reductase activity	3/1733	3/8342	0.00895	1	molecular_function	g4027;g4547;g800
GO:0000272	e	polysaccharide catabolic process	14/1733	34/8342	0.00899	1	biological_process	g1306;g1557;g1739;g3071;g3455;g5859;g6213;g6682;g6727;g6982;g7266;g7288;g8035;g916
GO:0032787	e	monocarboxylic acid metabolic process	61/1733	218/8342	0.0109	1	biological_process	g1029;g1268;g131;g1469;g1616;g1718;g1831;g1925;g2023;g2101;g2102;g2110;g2374;g251;g2549;g2605;g2636;g292;g3277;g3339;g3675;g3676;g4256;g4260;g4438;g4476;g4540;g4565;g4610;g4646;g4658;g4680;g4686;g5044;g5115;g5116;g5242;g5335;g5462;g547;g580;g5883;g6021;g6054;g609;g610;g6132;g6353;g6529;g662;g6729;g6886;g7090;g7432;g7618;g7956;g8044;g8172;g86;g866;g949
GO:0016830	e	carbon-carbon lyase activity	18/1733	49/8342	0.0119	1	molecular_function	g1461;g1527;g2027;g2110;g3277;g3467;g4256;g454;g4540;g4643;g4680;g4838;g610;g6258;g6353;g6371;g7725;g866
GO:0016829	e	lyase activity	45/1733	154/8342	0.0119	1	molecular_function	g1416;g1461;g1469;g1527;g1616;g2023;g2027;g2110;g2115;g2390;g2549;g3090;g3264;g3277;g3436;g3455;g3467;g3676;g3935;g4256;g4476;g4479;g454;g4540;g4643;g4680;g4838;g5063;g5116;g5410;g5422;g610;g6258;g6353;g6371;g6447;g6516;g6677;g7491;g7725;g7951;g8035;g8037;g8052;g866
GO:0006020	e	inositol metabolic process	5/1733	8/8342	0.0123	1	biological_process	g251;g4364;g4536;g583;g610
GO:0018966	e	styrene metabolic process	5/1733	8/8342	0.0123	1	biological_process	g1268;g4233;g4234;g5390;g5462
GO:0015851	e	nucleobase transport	5/1733	8/8342	0.0123	1	biological_process	g1840;g2057;g7012;g7098;g7417
GO:0033559	e	unsaturated fatty acid metabolic process	5/1733	8/8342	0.0123	1	biological_process	g4565;g4686;g5242;g580;g7618
GO:0042207	e	styrene catabolic process	5/1733	8/8342	0.0123	1	biological_process	g1268;g4233;g4234;g5390;g5462
GO:0015205	e	nucleobase transmembrane transporter activity	5/1733	8/8342	0.0123	1	molecular_function	g1840;g2057;g7012;g7098;g7417
GO:0009063	e	cellular amino acid catabolic process	24/1733	72/8342	0.0124	1	biological_process	g126;g2636;g292;g3090;g3721;g3965;g4234;g4235;g4236;g4364;g454;g4540;g4698;g5044;g5335;g5336;g547;g5943;g609;g6130;g6726;g6732;g6942;g7246
GO:0044264	e	cellular polysaccharide metabolic process	16/1733	43/8342	0.0129	1	biological_process	g1007;g1306;g14;g1444;g1445;g1512;g2321;g3071;g5801;g5859;g6021;g6316;g6682;g6727;g6982;g7121
GO:0015926	e	glucosidase activity	8/1733	17/8342	0.0137	1	molecular_function	g1007;g1557;g1867;g3071;g5801;g6682;g6727;g6982
GO:0003995	e	acyl-CoA dehydrogenase activity	7/1733	14/8342	0.0142	1	molecular_function	g1694;g2629;g4853;g6130;g6604;g7349;g806
GO:0008762	e	UDP-N-acetylmuramate dehydrogenase activity	11/1733	27/8342	0.0163	1	molecular_function	g2063;g2129;g2535;g3022;g408;g5807;g593;g6864;g7255;g7402;g8265
GO:0005507	e	copper ion binding	10/1733	23/8342	0.0163	1	molecular_function	g156;g3672;g3673;g4936;g5876;g6036;g7277;g7298;g8176;g988
GO:0050662	e	coenzyme binding	52/1733	184/8342	0.0165	1	molecular_function	g1029;g108;g1192;g1536;g1694;g1736;g1831;g1882;g1883;g2063;g2101;g2102;g2129;g2205;g222;g2374;g2535;g2553;g2629;g2681;g2767;g3022;g3410;g3615;g3972;g408;g4545;g4606;g4624;g4853;g4933;g5807;g593;g609;g6130;g6316;g6353;g6479;g6604;g6640;g6729;g6864;g7255;g7349;g7350;g7402;g7512;g8057;g806;g8258;g8265;g8334
GO:0019842	e	vitamin binding	25/1733	78/8342	0.0171	1	molecular_function	g1416;g1785;g1990;g2264;g2541;g2553;g2555;g3467;g3622;g3721;g3972;g4476;g4540;g4817;g5044;g5335;g5395;g5410;g5867;g6207;g6353;g6371;g6458;g7707;g8024
GO:0010181	e	FMN binding	13/1733	34/8342	0.0183	1	molecular_function	g1070;g1258;g2101;g2102;g2925;g4216;g4369;g6529;g655;g6981;g7418;g7452;g7956
GO:0016823	e	hydrolase activity, acting on acid carbon-carbon bonds, in ketonic substances	4/1733	6/8342	0.0194	1	molecular_function	g1527;g4233;g5335;g5390
GO:0016822	e	hydrolase activity, acting on acid carbon-carbon bonds	4/1733	6/8342	0.0194	1	molecular_function	g1527;g4233;g5335;g5390
GO:0006693	e	prostaglandin metabolic process	4/1733	6/8342	0.0194	1	biological_process	g4565;g4686;g5242;g580
GO:0006692	e	prostanoid metabolic process	4/1733	6/8342	0.0194	1	biological_process	g4565;g4686;g5242;g580
GO:0008496	e	mannan endo-1,6-alpha-mannosidase activity	4/1733	6/8342	0.0194	1	molecular_function	g2483;g43;g6227;g8242
GO:0044247	e	cellular polysaccharide catabolic process	4/1733	6/8342	0.0194	1	biological_process	g1306;g3071;g6727;g6982
GO:0016701	e	oxidoreductase activity, acting on single donors with incorporation of molecular oxygen	10/1733	24/8342	0.02	1	molecular_function	g3085;g3955;g4234;g4236;g5242;g5336;g583;g6886;g7090;g7246
GO:1901136	e	carbohydrate derivative catabolic process	8/1733	18/8342	0.0202	1	biological_process	g1027;g1461;g1739;g3410;g3934;g4454;g6481;g7351
GO:0016998	e	cell wall macromolecule catabolic process	5/1733	9/8342	0.0229	1	biological_process	g1027;g1306;g3175;g6481;g7351
GO:1901568	e	fatty acid derivative metabolic process	6/1733	12/8342	0.0232	1	biological_process	g4438;g4565;g4686;g4698;g5242;g580
GO:0008171	e	O-methyltransferase activity	6/1733	12/8342	0.0232	1	molecular_function	g3138;g778;g8017;g804;g8184;g942
GO:0016645	e	oxidoreductase activity, acting on the CH-NH group of donors	9/1733	21/8342	0.0257	1	molecular_function	g129;g285;g4027;g4369;g4547;g5943;g6731;g6732;g800
GO:0006082	e	organic acid metabolic process	149/1733	612/8342	0.026	1	biological_process	g1029;g1083;g1192;g126;g1268;g1297;g1298;g131;g1416;g1469;g15;g1527;g1616;g1624;g1718;g1831;g1882;g1883;g1925;g2023;g209;g2101;g2102;g2110;g2150;g2264;g2301;g2374;g242;g247;g251;g2531;g2549;g2555;g2605;g2636;g2767;g285;g2864;g292;g3;g3050;g3085;g3090;g321;g3277;g3339;g3413;g3467;g3501;g3615;g3622;g3675;g3676;g3721;g396;g3965;g401;g4027;g4044;g4232;g4233;g4234;g4235;g4236;g4256;g4260;g4364;g4438;g…
GO:0005576	e	extracellular region	34/1733	115/8342	0.0271	1	cellular_component	g1039;g131;g14;g1557;g1739;g209;g222;g2446;g3071;g343;g3455;g3901;g3934;g4106;g4454;g4551;g5550;g5801;g5859;g5923;g610;g6282;g6727;g6982;g7288;g7311;g7350;g75;g8008;g8035;g812;g8145;g8334;g916
GO:0006066	e	alcohol metabolic process	21/1733	64/8342	0.0288	1	biological_process	g1192;g222;g247;g251;g2767;g3197;g3615;g3965;g4364;g4536;g4606;g583;g6021;g610;g6353;g6640;g7512;g7951;g8222;g8258;g8334
GO:0043436	e	oxoacid metabolic process	148/1733	610/8342	0.0295	1	biological_process	g1029;g1083;g1192;g126;g1268;g1297;g1298;g131;g1416;g1469;g15;g1527;g1616;g1624;g1718;g1831;g1882;g1883;g1925;g2023;g2101;g2102;g2110;g2150;g2264;g2301;g2374;g242;g247;g251;g2531;g2549;g2555;g2605;g2636;g2767;g285;g2864;g292;g3;g3050;g3085;g3090;g321;g3277;g3339;g3413;g3467;g3501;g3615;g3622;g3675;g3676;g3721;g396;g3965;g401;g4027;g4044;g4232;g4233;g4234;g4235;g4236;g4256;g4260;g4364;g4438;g4476;…
GO:0046232	e	carbazole catabolic process	3/1733	4/8342	0.0302	1	biological_process	g3277;g6886;g7090
GO:0030245	e	cellulose catabolic process	3/1733	4/8342	0.0302	1	biological_process	g3071;g6727;g6982
GO:0043945	e	positive regulation of asexual sporulation resulting in formation of a cellular spore	3/1733	4/8342	0.0302	1	biological_process	g3237;g5242;g677
GO:0070189	e	kynurenine metabolic process	3/1733	4/8342	0.0302	1	biological_process	g5335;g5336;g7246
GO:0016801	e	hydrolase activity, acting on ether bonds	3/1733	4/8342	0.0302	1	molecular_function	g7183;g72;g7683
GO:0051275	e	beta-glucan catabolic process	3/1733	4/8342	0.0302	1	biological_process	g3071;g6727;g6982
GO:0030687	e	preribosome, large subunit precursor	3/1733	4/8342	0.0302	1	cellular_component	g3013;g5568;g778
GO:0018884	e	carbazole metabolic process	3/1733	4/8342	0.0302	1	biological_process	g3277;g6886;g7090
GO:0051701	e	interaction with host	3/1733	4/8342	0.0302	1	biological_process	g4454;g8313;g939
GO:0043531	e	ADP binding	3/1733	4/8342	0.0302	1	molecular_function	g4228;g6413;g7234
GO:0052736	e	beta-glucanase activity	3/1733	4/8342	0.0302	1	molecular_function	g3175;g6182;g7611
GO:0006097	e	glyoxylate cycle	3/1733	4/8342	0.0302	1	biological_process	g2110;g4680;g866
GO:1900815	e	monodictyphenone biosynthetic process	3/1733	4/8342	0.0302	1	biological_process	g3675;g3676;g4646
GO:0009308	e	amine metabolic process	26/1733	85/8342	0.031	1	biological_process	g1268;g131;g15;g1812;g210;g2301;g242;g2555;g2636;g3050;g3413;g401;g4799;g5242;g5335;g5336;g5462;g5786;g6036;g7246;g7277;g7298;g8024;g8176;g8222;g8304
GO:1901606	e	alpha-amino acid catabolic process	21/1733	66/8342	0.0325	1	biological_process	g126;g2636;g292;g3721;g3965;g4234;g4235;g4236;g4364;g454;g4540;g4698;g5335;g5336;g5943;g609;g6130;g6726;g6732;g6942;g7246
GO:1900673	e	olefin metabolic process	6/1733	13/8342	0.0356	1	biological_process	g1268;g2636;g4233;g4234;g5390;g5462
GO:0004806	e	triglyceride lipase activity	6/1733	13/8342	0.0356	1	molecular_function	g241;g4084;g4915;g7198;g7774;g812
GO:0009074	e	aromatic amino acid family catabolic process	6/1733	13/8342	0.0356	1	biological_process	g4234;g4235;g4236;g5335;g5336;g7246
GO:0019752	e	carboxylic acid metabolic process	146/1733	605/8342	0.0373	1	biological_process	g1029;g1083;g1192;g126;g1268;g1297;g1298;g131;g1416;g1469;g15;g1527;g1616;g1624;g1718;g1831;g1925;g2023;g2101;g2102;g2110;g2150;g2264;g2301;g2374;g242;g247;g251;g2531;g2549;g2555;g2605;g2636;g2767;g285;g2864;g292;g3;g3050;g3085;g3090;g321;g3277;g3339;g3413;g3467;g3501;g3615;g3622;g3675;g3676;g3721;g396;g3965;g401;g4027;g4044;g4232;g4233;g4234;g4235;g4236;g4256;g4260;g4364;g4438;g4476;g454;g4540;g…
GO:0048038	e	quinone binding	4/1733	7/8342	0.0379	1	molecular_function	g6036;g7277;g7298;g8176
GO:0006690	e	icosanoid metabolic process	4/1733	7/8342	0.0379	1	biological_process	g4565;g4686;g5242;g580
GO:0045881	e	positive regulation of sporulation resulting in formation of a cellular spore	4/1733	7/8342	0.0379	1	biological_process	g1327;g3237;g5242;g677
GO:0006083	e	acetate metabolic process	5/1733	10/8342	0.0381	1	biological_process	g1925;g2110;g2605;g4256;g4680
GO:0030246	e	carbohydrate binding	11/1733	30/8342	0.0411	1	molecular_function	g14;g1557;g2541;g3030;g4111;g4891;g5907;g621;g6458;g8145;g884
GO:0006027	e	glycosaminoglycan catabolic process	2/1733	2/8342	0.0431	1	biological_process	g1739;g6481
GO:0044003	e	modification by symbiont of host morphology or physiology	2/1733	2/8342	0.0431	1	biological_process	g8313;g939
GO:0001906	e	cell killing	2/1733	2/8342	0.0431	1	biological_process	g8313;g939
GO:0001907	e	killing by symbiont of host cells	2/1733	2/8342	0.0431	1	biological_process	g8313;g939
GO:0016160	e	amylase activity	2/1733	2/8342	0.0431	1	molecular_function	g1007;g7121
GO:0019953	e	sexual reproduction	2/1733	2/8342	0.0431	1	biological_process	g2954;g7226
GO:0035673	e	oligopeptide transmembrane transporter activity	2/1733	2/8342	0.0431	1	molecular_function	g4984;g7494
GO:0035672	e	oligopeptide transmembrane transport	2/1733	2/8342	0.0431	1	biological_process	g4984;g7494
GO:0044703	e	multi-organism reproductive process	2/1733	2/8342	0.0431	1	biological_process	g2954;g7226
GO:0004460	e	L-lactate dehydrogenase (cytochrome) activity	2/1733	2/8342	0.0431	1	molecular_function	g6529;g7956
GO:0052331	e	hemolysis in other organism involved in symbiotic interaction	2/1733	2/8342	0.0431	1	biological_process	g8313;g939
GO:0003842	e	1-pyrroline-5-carboxylate dehydrogenase activity	2/1733	2/8342	0.0431	1	molecular_function	g4027;g6731
GO:0003840	e	obsolete gamma-glutamyltransferase activity	2/1733	2/8342	0.0431	1	molecular_function	g4686;g580
GO:0044004	e	disruption by symbiont of host cell	2/1733	2/8342	0.0431	1	biological_process	g8313;g939
GO:0051883	e	killing of cells in other organism involved in symbiotic interaction	2/1733	2/8342	0.0431	1	biological_process	g8313;g939
GO:2001305	e	xanthone-containing compound metabolic process	2/1733	2/8342	0.0431	1	biological_process	g3675;g3676
GO:2001307	e	xanthone-containing compound biosynthetic process	2/1733	2/8342	0.0431	1	biological_process	g3675;g3676
GO:0004334	e	fumarylacetoacetase activity	2/1733	2/8342	0.0431	1	molecular_function	g4233;g5390
GO:0001897	e	cytolysis by symbiont of host cells	2/1733	2/8342	0.0431	1	biological_process	g8313;g939
GO:0044179	e	hemolysis in other organism	2/1733	2/8342	0.0431	1	biological_process	g8313;g939
GO:0051715	e	cytolysis in other organism	2/1733	2/8342	0.0431	1	biological_process	g8313;g939
GO:1903008	e	organelle disassembly	2/1733	2/8342	0.0431	1	biological_process	g1299;g2903
GO:0051801	e	cytolysis in other organism involved in symbiotic interaction	2/1733	2/8342	0.0431	1	biological_process	g8313;g939
GO:0052862	e	glucan endo-1,4-beta-glucanase activity, C-3 substituted reducing group	2/1733	2/8342	0.0431	1	molecular_function	g3175;g7611
GO:0016856	e	racemase and epimerase activity, acting on hydroxy acids and derivatives	2/1733	2/8342	0.0431	1	molecular_function	g547;g6054
GO:0044764	e	multi-organism cellular process	2/1733	2/8342	0.0431	1	biological_process	g8313;g939
GO:0019835	e	cytolysis	2/1733	2/8342	0.0431	1	biological_process	g8313;g939
GO:0019836	e	hemolysis by symbiont of host erythrocytes	2/1733	2/8342	0.0431	1	biological_process	g8313;g939
GO:0008271	e	secondary active sulfate transmembrane transporter activity	2/1733	2/8342	0.0431	1	molecular_function	g3257;g6310
GO:0033754	e	indoleamine 2,3-dioxygenase activity	2/1733	2/8342	0.0431	1	molecular_function	g5336;g7246
GO:0044364	e	disruption of cells of other organism	2/1733	2/8342	0.0431	1	biological_process	g8313;g939
GO:0033961	e	cis-stilbene-oxide hydrolase activity	2/1733	2/8342	0.0431	1	molecular_function	g7183;g72
GO:0051817	e	modification of morphology or physiology of other organism involved in symbiotic interaction	2/1733	2/8342	0.0431	1	biological_process	g8313;g939
GO:0051818	e	disruption of cells of other organism involved in symbiotic interaction	2/1733	2/8342	0.0431	1	biological_process	g8313;g939
GO:0004556	e	alpha-amylase activity	2/1733	2/8342	0.0431	1	molecular_function	g1007;g7121
GO:0018838	e	mandelate racemase activity	2/1733	2/8342	0.0431	1	molecular_function	g547;g6054
GO:0031640	e	killing of cells of other organism	2/1733	2/8342	0.0431	1	biological_process	g8313;g939
GO:0015198	e	oligopeptide transporter activity	2/1733	2/8342	0.0431	1	molecular_function	g4984;g7494
GO:0035821	e	modification of morphology or physiology of other organism	2/1733	2/8342	0.0431	1	biological_process	g8313;g939
GO:0072329	e	monocarboxylic acid catabolic process	10/1733	26/8342	0.0478	1	biological_process	g1925;g2023;g2110;g2549;g3277;g4680;g5044;g5115;g5116;g7432
