# Supplementary material for: Genome sequencing of Aspergillus glaucus ‘CCHA’ provides insights into salt-stress adaptation
Source: PeerJ. 2020 Feb 24;8:e8609. doi: 10.7717/peerj.8609 (PMC7045888; doi:10.7717/peerj.8609)
Supplement: Supplemental Information 3 [file peerj-08-8609-s003.xls]

## Sheet: Sample36H_1M_vs_Sample36H_3M.DE
#Term	Database	Id	Sample number	Background number	P-Value	Corrected P-Value	Genes	Hyperlink	typeII	typeI
Starch and sucrose metabolism	KEGG PATHWAY	ko00500	15	53	0.000274409	0.0280393	g3029|g5678|g5859|g1445|g1444|g3071|g1557|g1653|g1443|g6982|g1001|g6682|g6021|g1007|g3112	http://www.genome.jp/kegg-bin/show_pathway?ko00500/K01193%09red/K01176%09red/K01187%09red/K00844%09red/K16055%09red/K15920%09red/K01210%09red/K05349%09red/K00697%09red	Carbohydrate metabolism	Metabolism
Tyrosine metabolism	KEGG PATHWAY	ko00350	13	42	0.000339871	0.0280393	g8082|g3169|g6056|g5063|g7277|g4232|g4236|g5390|g8243|g1979|g7218|g8184|g3965	http://www.genome.jp/kegg-bin/show_pathway?ko00350/K00276%09red/K14454%09red/K01800%09red/K01555%09red/K00545%09red/K00457%09red/K13953%09red/K00505%09red	Amino acid metabolism	Metabolism
Glyoxylate and dicarboxylate metabolism	KEGG PATHWAY	ko00630	12	42	0.00103208	0.052657	g7182|g4680|g3721|g5786|g131|g401|g3050|g3622|g8222|g802|g7490|g15	http://www.genome.jp/kegg-bin/show_pathway?ko00630/K03781%09red/K00281%09red/K04835%09red/K00600%09red/K01637%09red/K01455%09red/K01647%09red	Carbohydrate metabolism	Metabolism
Degradation of aromatic compounds	KEGG PATHWAY	ko01220	9	26	0.00146691	0.052657	g6056|g6886|g7711|g3965|g3276|g8243|g5805|g4218|g140	http://www.genome.jp/kegg-bin/show_pathway?ko01220/K13953%09red/K00480%09red/K03381%09red/K00002%09red	Global and overview maps	Metabolism
FoxO signaling pathway	KEGG PATHWAY	ko04068	9	27	0.00181831	0.052657	g7182|g3|g401|g2903|g3050|g8222|g1664|g5786|g15	http://www.genome.jp/kegg-bin/show_pathway?ko04068/K03781%09red/K08341%09red/K04441%09red/K04564%09red	Signal transduction	Environmental Information Processing
Carbon metabolism	KEGG PATHWAY	ko01200	23	128	0.00223278	0.052657	g131|g917|g8222|g610|g7182|g5786|g802|g7490|g7218|g4680|g3050|g252|g6729|g1243|g3169|g3721|g401|g3622|g815|g285|g15|g5422|g6021	http://www.genome.jp/kegg-bin/show_pathway?ko01200/K03781%09red/K01808%09red/K17100%09red/K01647%09red/K14454%09red/K01900%09red/K00844%09red/K00297%09red/K00281%09red/K00027%09red/K04835%09red/K00600%09red/K01624%09red/K01637%09red/K01455%09red/K00033%09red/K01738%09red	Global and overview maps	Metabolism
Galactose metabolism	KEGG PATHWAY	ko00052	9	28	0.00223393	0.052657	g3029|g5678|g8285|g3090|g3030|g916|g1557|g1007|g6021	http://www.genome.jp/kegg-bin/show_pathway?ko00052/K01193%09red/K01187%09red/K00844%09red/K01684%09red/K01785%09red/K04618%09red/K07407%09red	Carbohydrate metabolism	Metabolism
Naphthalene degradation	KEGG PATHWAY	ko00626	7	18	0.00291683	0.0601597	g6056|g3965|g3276|g8243|g5805|g4218|g140	http://www.genome.jp/kegg-bin/show_pathway?ko00626/K13953%09red/K00480%09red	Xenobiotics biodegradation and metabolism	Metabolism
Cyanoamino acid metabolism	KEGG PATHWAY	ko00460	6	18	0.0104878	0.17305	g2343|g3071|g131|g3339|g3622|g6982	http://www.genome.jp/kegg-bin/show_pathway?ko00460/K00600%09red/K01455%09red/K10675%09red/K05349%09red/K01424%09red	Metabolism of other amino acids	Metabolism
Tryptophan metabolism	KEGG PATHWAY	ko00380	9	41	0.0175721	0.263061	g7182|g5386|g5786|g401|g3050|g5336|g5335|g8222|g15	http://www.genome.jp/kegg-bin/show_pathway?ko00380/K03781%09red/K00128%09red/K01556%09red/K00463%09red	Amino acid metabolism	Metabolism
Isoquinoline alkaloid biosynthesis	KEGG PATHWAY	ko00950	5	15	0.0191317	0.263061	g8082|g3169|g7218|g7277|g1979	http://www.genome.jp/kegg-bin/show_pathway?ko00950/K00276%09red/K14454%09red/K00505%09red	Biosynthesis of other secondary metabolites	Metabolism
beta-Alanine metabolism	KEGG PATHWAY	ko00410	6	22	0.0222868	0.282871	g1979|g2106|g5386|g7277|g4540|g5044	http://www.genome.jp/kegg-bin/show_pathway?ko00410/K13524%09red/K13366%09red/K00276%09red/K01580%09red/K00128%09red	Metabolism of other amino acids	Metabolism
Dioxin degradation	KEGG PATHWAY	ko00621	4	11	0.0283313	0.333905	g5805|g4218|g140|g3276	http://www.genome.jp/kegg-bin/show_pathway?ko00621/K00480%09red	Xenobiotics biodegradation and metabolism	Metabolism
Tropane, piperidine and pyridine alkaloid biosynthesis	KEGG PATHWAY	ko00960	4	13	0.0434463	0.477909	g3169|g7218|g7277|g1979	http://www.genome.jp/kegg-bin/show_pathway?ko00960/K00276%09red/K14454%09red	Biosynthesis of other secondary metabolites	Metabolism
Pentose and glucuronate interconversions	KEGG PATHWAY	ko00040	7	35	0.0497338	0.482228	g5386|g3210|g4563|g1235|g2097|g7711|g6447	http://www.genome.jp/kegg-bin/show_pathway?ko00040/K00065%09red/K00002%09red/K00128%09red/K18103%09red/K05351%09red/K17818%09red	Carbohydrate metabolism	Metabolism
Alanine, aspartate and glutamate metabolism	KEGG PATHWAY	ko00250	7	35	0.0497338	0.482228	g3169|g3339|g5044|g4540|g1098|g6731|g7218	http://www.genome.jp/kegg-bin/show_pathway?ko00250/K13524%09red/K14454%09red/K00294%09red/K01779%09red/K01580%09red/K01424%09red	Amino acid metabolism	Metabolism
Retinol metabolism	KEGG PATHWAY	ko00830	3	8	0.0534627	0.482228	g6056|g3965|g8243	http://www.genome.jp/kegg-bin/show_pathway?ko00830/K13953%09red	Metabolism of cofactors and vitamins	Metabolism
Glycolysis / Gluconeogenesis	KEGG PATHWAY	ko00010	9	52	0.0555293	0.482228	g6056|g3030|g3972|g5386|g7711|g3965|g8243|g610|g6021	http://www.genome.jp/kegg-bin/show_pathway?ko00010/K00002%09red/K00844%09red/K00128%09red/K01785%09red/K01568%09red/K01624%09red/K13953%09red	Carbohydrate metabolism	Metabolism
Phenylalanine metabolism	KEGG PATHWAY	ko00360	6	29	0.0596187	0.489392	g3169|g5063|g7277|g1979|g7218|g4236	http://www.genome.jp/kegg-bin/show_pathway?ko00360/K00276%09red/K14454%09red/K00457%09red	Amino acid metabolism	Metabolism
GABAergic synapse	KEGG PATHWAY	ko04727	4	15	0.0622862	0.489392	g2903|g5044|g7478|g4540	http://www.genome.jp/kegg-bin/show_pathway?ko04727/K13524%09red/K08341%09red/K05185%09red/K01580%09red	Nervous system	Organismal Systems
Amino sugar and nucleotide sugar metabolism	KEGG PATHWAY	ko00520	9	55	0.0713553	0.517876	g3934|g3842|g2792|g5859|g7158|g7773|g3839|g7351|g6021	http://www.genome.jp/kegg-bin/show_pathway?ko00520/K01183%09red/K15920%09red/K00844%09red/K12373%09red/K02564%09red/K01443%09red/K01209%09red	Carbohydrate metabolism	Metabolism
Chloroalkane and chloroalkene degradation	KEGG PATHWAY	ko00625	6	31	0.0746209	0.517876	g1980|g8057|g6056|g5386|g3965|g8243	http://www.genome.jp/kegg-bin/show_pathway?ko00625/K00128%09red/K13953%09red/K00100%09red	Xenobiotics biodegradation and metabolism	Metabolism
Peroxisome	KEGG PATHWAY	ko04146	10	65	0.0793799	0.517876	g7182|g5786|g3050|g401|g8222|g1925|g6026|g1664|g5807|g15	http://www.genome.jp/kegg-bin/show_pathway?ko04146/K00106%09red/K03781%09red/K07513%09red/K04564%09red/K00624%09red	Transport and catabolism	Cellular Processes
Carbon fixation in photosynthetic organisms	KEGG PATHWAY	ko00710	5	24	0.0807101	0.517876	g3169|g7218|g7725|g610|g252	http://www.genome.jp/kegg-bin/show_pathway?ko00710/K01808%09red/K01621%09red/K01624%09red/K14454%09red	Energy metabolism	Metabolism
Nitrogen metabolism	KEGG PATHWAY	ko00910	4	17	0.0847434	0.517876	g131|g616|g3955|g1883	http://www.genome.jp/kegg-bin/show_pathway?ko00910/K00459%09red/K01455%09red/K10534%09red	Energy metabolism	Metabolism
Polycyclic aromatic hydrocarbon degradation	KEGG PATHWAY	ko00624	4	17	0.0847434	0.517876	g5805|g4218|g140|g3276	http://www.genome.jp/kegg-bin/show_pathway?ko00624/K00480%09red	Xenobiotics biodegradation and metabolism	Metabolism
Arginine and proline metabolism	KEGG PATHWAY	ko00330	7	41	0.0899064	0.529805	g3169|g2106|g6731|g5386|g1813|g210|g7218	http://www.genome.jp/kegg-bin/show_pathway?ko00330/K14454%09red/K00294%09red/K00128%09red/K00613%09red/K01581%09red/K13366%09red	Amino acid metabolism	Metabolism
Drug metabolism - cytochrome P450	KEGG PATHWAY	ko00982	4	18	0.0972583	0.553366	g6056|g4219|g3965|g8243	http://www.genome.jp/kegg-bin/show_pathway?ko00982/K13953%09red/K00799%09red	Xenobiotics biodegradation and metabolism	Metabolism
Steroid hormone biosynthesis	KEGG PATHWAY	ko00140	2	5	0.104832	0.575416	g7834|g8184	http://www.genome.jp/kegg-bin/show_pathway?ko00140/K00545%09red/K01130%09red	Lipid metabolism	Metabolism
Pentose phosphate pathway	KEGG PATHWAY	ko00030	5	27	0.112565	0.575416	g6729|g7725|g610|g252|g1461	http://www.genome.jp/kegg-bin/show_pathway?ko00030/K01808%09red/K01619%09red/K01624%09red/K00033%09red/K01621%09red	Carbohydrate metabolism	Metabolism
Glycerophospholipid metabolism	KEGG PATHWAY	ko00564	7	44	0.115272	0.575416	g2625|g5858|g2949|g5556|g6258|g814|g3410	http://www.genome.jp/kegg-bin/show_pathway?ko00564/K00006%09red/K01114%09red/K00981%09red/K00550%09red/K01613%09red/K14674%09red	Lipid metabolism	Metabolism
Fructose and mannose metabolism	KEGG PATHWAY	ko00051	8	53	0.117539	0.575416	g1980|g8057|g222|g6054|g252|g7328|g610|g6021	http://www.genome.jp/kegg-bin/show_pathway?ko00051/K01808%09red/K17742%09red/K12661%09red/K00844%09red/K00009%09red/K01624%09red/K00100%09red	Carbohydrate metabolism	Metabolism
Valine, leucine and isoleucine degradation	KEGG PATHWAY	ko00280	6	36	0.120549	0.575416	g6130|g5386|g609|g6026|g5044|g4438	http://www.genome.jp/kegg-bin/show_pathway?ko00280/K13524%09red/K00128%09red/K00253%09red/K07513%09red/K09699%09red/K00020%09red	Amino acid metabolism	Metabolism
Fatty acid degradation	KEGG PATHWAY	ko00071	5	28	0.124348	0.575416	g6026|g6056|g3965|g5386|g8243	http://www.genome.jp/kegg-bin/show_pathway?ko00071/K00128%09red/K13953%09red/K07513%09red	Lipid metabolism	Metabolism
Thiamine metabolism	KEGG PATHWAY	ko00730	2	6	0.13252	0.575416	g7597|g4324	http://www.genome.jp/kegg-bin/show_pathway?ko00730/K18278%09red/K03146%09red	Metabolism of cofactors and vitamins	Metabolism
C5-Branched dibasic acid metabolism	KEGG PATHWAY	ko00660	2	6	0.13252	0.575416	g4545|g802	http://www.genome.jp/kegg-bin/show_pathway?ko00660/K00052%09red/K04835%09red	Carbohydrate metabolism	Metabolism
Osteoclast differentiation	KEGG PATHWAY	ko04380	2	6	0.13252	0.575416	g3|g4522	http://www.genome.jp/kegg-bin/show_pathway?ko04380/K04441%09red/K08008%09red	Development	Organismal Systems
Linoleic acid metabolism	KEGG PATHWAY	ko00591	4	21	0.139459	0.590019	g4990|g1980|g8057|g2625	http://www.genome.jp/kegg-bin/show_pathway?ko00591/K14674%09red/K00100%09red/K17862%09red	Lipid metabolism	Metabolism
Metabolism of xenobiotics by cytochrome P450	KEGG PATHWAY	ko00980	4	22	0.154915	0.620113	g6056|g4219|g3965|g8243	http://www.genome.jp/kegg-bin/show_pathway?ko00980/K13953%09red/K00799%09red	Xenobiotics biodegradation and metabolism	Metabolism
Phenylalanine, tyrosine and tryptophan biosynthesis	KEGG PATHWAY	ko00400	4	22	0.154915	0.620113	g4744|g7218|g2654|g3169	http://www.genome.jp/kegg-bin/show_pathway?ko00400/K01657%09red/K14454%09red/K01626%09red	Amino acid metabolism	Metabolism
alpha-Linolenic acid metabolism	KEGG PATHWAY	ko00592	2	7	0.161605	0.620113	g6026|g2625	http://www.genome.jp/kegg-bin/show_pathway?ko00592/K14674%09red/K07513%09red	Lipid metabolism	Metabolism
Carbohydrate digestion and absorption	KEGG PATHWAY	ko04973	2	7	0.161605	0.620113	g6021|g1653	http://www.genome.jp/kegg-bin/show_pathway?ko04973/K01176%09red/K00844%09red	Digestive system	Organismal Systems
Toluene degradation	KEGG PATHWAY	ko00623	2	8	0.191681	0.658903	g686|g6886	http://www.genome.jp/kegg-bin/show_pathway?ko00623/K03381%09red/K03380%09red	Xenobiotics biodegradation and metabolism	Metabolism
Leukocyte transendothelial migration	KEGG PATHWAY	ko04670	2	8	0.191681	0.658903	g3|g4522	http://www.genome.jp/kegg-bin/show_pathway?ko04670/K04441%09red/K08008%09red	Immune system	Organismal Systems
Taurine and hypotaurine metabolism	KEGG PATHWAY	ko00430	2	8	0.191681	0.658903	g3085|g4540	http://www.genome.jp/kegg-bin/show_pathway?ko00430/K01580%09red/K00456%09red	Metabolism of other amino acids	Metabolism
Biotin metabolism	KEGG PATHWAY	ko00780	2	8	0.191681	0.658903	g3675|g1718	http://www.genome.jp/kegg-bin/show_pathway?ko00780/K00059%09red	Metabolism of cofactors and vitamins	Metabolism
Streptomycin biosynthesis	KEGG PATHWAY	ko00521	3	16	0.19578	0.659258	g5817|g2020|g6021	http://www.genome.jp/kegg-bin/show_pathway?ko00521/K00010%09red/K01092%09red/K00844%09red	Biosynthesis of other secondary metabolites	Metabolism
Steroid biosynthesis	KEGG PATHWAY	ko00100	4	25	0.204686	0.675465	g926|g2625|g1097|g2544	http://www.genome.jp/kegg-bin/show_pathway?ko00100/K05917%09red/K01824%09red/K00222%09red/K14674%09red	Lipid metabolism	Metabolism
Biosynthesis of unsaturated fatty acids	KEGG PATHWAY	ko01040	3	17	0.217433	0.692364	g6026|g3675|g1718	http://www.genome.jp/kegg-bin/show_pathway?ko01040/K07513%09red/K00059%09red	Lipid metabolism	Metabolism
Lysosome	KEGG PATHWAY	ko04142	4	26	0.222219	0.692364	g75|g6635|g4983|g3934	http://www.genome.jp/kegg-bin/show_pathway?ko04142/K13289%09red/K12373%09red/K01279%09red	Transport and catabolism	Cellular Processes
Retrograde endocannabinoid signaling	KEGG PATHWAY	ko04723	2	9	0.222396	0.692364	g3|g7478	http://www.genome.jp/kegg-bin/show_pathway?ko04723/K05185%09red/K04441%09red	Nervous system	Organismal Systems
Cysteine and methionine metabolism	KEGG PATHWAY	ko00270	6	45	0.229292	0.700615	g3169|g3085|g7683|g7218|g6493|g5422	http://www.genome.jp/kegg-bin/show_pathway?ko00270/K01738%09red/K01251%09red/K14454%09red/K00456%09red/K00549%09red	Amino acid metabolism	Metabolism
Fatty acid biosynthesis	KEGG PATHWAY	ko00061	2	10	0.25345	0.728286	g3675|g1718	http://www.genome.jp/kegg-bin/show_pathway?ko00061/K00059%09red	Lipid metabolism	Metabolism
Ubiquinone and other terpenoid-quinone biosynthesis	KEGG PATHWAY	ko00130	2	10	0.25345	0.728286	g4236|g5063	http://www.genome.jp/kegg-bin/show_pathway?ko00130/K00457%09red	Metabolism of cofactors and vitamins	Metabolism
Phenylpropanoid biosynthesis	KEGG PATHWAY	ko00940	2	10	0.25345	0.728286	g6982|g3071	http://www.genome.jp/kegg-bin/show_pathway?ko00940/K05349%09red	Biosynthesis of other secondary metabolites	Metabolism
Various types of N-glycan biosynthesis	KEGG PATHWAY	ko00513	4	28	0.258348	0.728286	g2695|g5307|g1666|g6327	http://www.genome.jp/kegg-bin/show_pathway?ko00513/K05535%09red/K01230%09red	Glycan biosynthesis and metabolism	Metabolism
Ribosome biogenesis in eukaryotes	KEGG PATHWAY	ko03008	8	67	0.260417	0.728286	g172|g3174|g3343|g4082|g5263|g4850|g361|g6219	http://www.genome.jp/kegg-bin/show_pathway?ko03008/K14549%09red/K14567%09red/K14566%09red/K14569%09red/K14556%09red/K14546%09red/K14537%09red/K07178%09red	Translation	Genetic Information Processing
Glutathione metabolism	KEGG PATHWAY	ko00480	4	29	0.276831	0.748804	g210|g4219|g6729|g348	http://www.genome.jp/kegg-bin/show_pathway?ko00480/K01581%09red/K00033%09red/K00799%09red/K01469%09red	Metabolism of other amino acids	Metabolism
Glycerolipid metabolism	KEGG PATHWAY	ko00561	4	29	0.276831	0.748804	g5386|g2625|g7711|g916	http://www.genome.jp/kegg-bin/show_pathway?ko00561/K00128%09red/K07407%09red/K00002%09red/K14674%09red	Lipid metabolism	Metabolism
Glycine, serine and threonine metabolism	KEGG PATHWAY	ko00260	6	50	0.29973	0.797668	g3721|g1979|g3622|g1813|g7277|g4221	http://www.genome.jp/kegg-bin/show_pathway?ko00260/K00613%09red/K00276%09red/K00281%09red/K01733%09red/K00600%09red	Amino acid metabolism	Metabolism
Inositol phosphate metabolism	KEGG PATHWAY	ko00562	3	21	0.307597	0.801114	g5817|g814|g2020	http://www.genome.jp/kegg-bin/show_pathway?ko00562/K00010%09red/K01092%09red/K01114%09red	Carbohydrate metabolism	Metabolism
Chlorocyclohexane and chlorobenzene degradation	KEGG PATHWAY	ko00361	2	12	0.31559	0.801114	g686|g6886	http://www.genome.jp/kegg-bin/show_pathway?ko00361/K03381%09red/K03380%09red	Xenobiotics biodegradation and metabolism	Metabolism
Phosphatidylinositol signaling system	KEGG PATHWAY	ko04070	2	12	0.31559	0.801114	g2020|g2949	http://www.genome.jp/kegg-bin/show_pathway?ko04070/K01092%09red/K00981%09red	Signal transduction	Environmental Information Processing
Arginine biosynthesis	KEGG PATHWAY	ko00220	3	22	0.330525	0.826313	g3169|g7218|g4799	http://www.genome.jp/kegg-bin/show_pathway?ko00220/K01427%09red/K14454%09red	Amino acid metabolism	Metabolism
Ether lipid metabolism	KEGG PATHWAY	ko00565	2	13	0.346277	0.852771	g2625|g814	http://www.genome.jp/kegg-bin/show_pathway?ko00565/K14674%09red/K01114%09red	Lipid metabolism	Metabolism
One carbon pool by folate	KEGG PATHWAY	ko00670	2	14	0.376494	0.89497	g3622|g285	http://www.genome.jp/kegg-bin/show_pathway?ko00670/K00297%09red/K00600%09red	Metabolism of cofactors and vitamins	Metabolism
Butirosin and neomycin biosynthesis	KEGG PATHWAY	ko00524	1	5	0.397899	0.89497	g6021	http://www.genome.jp/kegg-bin/show_pathway?ko00524/K00844%09red	_	_
Propanoate metabolism	KEGG PATHWAY	ko00640	3	25	0.398876	0.89497	g917|g5044|g4438	http://www.genome.jp/kegg-bin/show_pathway?ko00640/K13524%09red/K01900%09red/K09699%09red	Carbohydrate metabolism	Metabolism
Styrene degradation	KEGG PATHWAY	ko00643	2	15	0.406118	0.89497	g5390|g4232	http://www.genome.jp/kegg-bin/show_pathway?ko00643/K01800%09red/K01555%09red	Xenobiotics biodegradation and metabolism	Metabolism
Methane metabolism	KEGG PATHWAY	ko00680	3	26	0.421283	0.89497	g815|g610|g3622	http://www.genome.jp/kegg-bin/show_pathway?ko00680/K00600%09red/K17100%09red/K01624%09red	Energy metabolism	Metabolism
Biosynthesis of amino acids	KEGG PATHWAY	ko01230	12	125	0.433572	0.89497	g3169|g4744|g2654|g610|g3622|g4545|g252|g4221|g7490|g7218|g6493|g5422	http://www.genome.jp/kegg-bin/show_pathway?ko01230/K01808%09red/K14454%09red/K00052%09red/K01738%09red/K00600%09red/K01624%09red/K01733%09red/K01626%09red/K01647%09red/K01657%09red/K00549%09red	Global and overview maps	Metabolism
Sphingolipid metabolism	KEGG PATHWAY	ko00600	2	16	0.435045	0.89497	g7834|g916	http://www.genome.jp/kegg-bin/show_pathway?ko00600/K07407%09red/K01130%09red	Lipid metabolism	Metabolism
Regulation of autophagy	KEGG PATHWAY	ko04140	2	16	0.435045	0.89497	g2903|g7479	http://www.genome.jp/kegg-bin/show_pathway?ko04140/K08341%09red/K08343%09red	_	_
Signaling pathways regulating pluripotency of stem cells	KEGG PATHWAY	ko04550	1	6	0.446744	0.89497	g3	http://www.genome.jp/kegg-bin/show_pathway?ko04550/K04441%09red	Cellular community - eukaryotes	Cellular Processes
Caprolactam degradation	KEGG PATHWAY	ko00930	1	6	0.446744	0.89497	g7711	http://www.genome.jp/kegg-bin/show_pathway?ko00930/K00002%09red	Xenobiotics biodegradation and metabolism	Metabolism
ABC transporters	KEGG PATHWAY	ko02010	1	6	0.446744	0.89497	g2661	http://www.genome.jp/kegg-bin/show_pathway?ko02010/K05658%09red	Membrane transport	Environmental Information Processing
Butanoate metabolism	KEGG PATHWAY	ko00650	4	40	0.483029	0.89497	g1980|g8057|g5044|g4540	http://www.genome.jp/kegg-bin/show_pathway?ko00650/K13524%09red/K01580%09red/K00100%09red	Carbohydrate metabolism	Metabolism
HIF-1 signaling pathway	KEGG PATHWAY	ko04066	2	18	0.4905	0.89497	g6021|g4522	http://www.genome.jp/kegg-bin/show_pathway?ko04066/K00844%09red/K08008%09red	Signal transduction	Environmental Information Processing
Ribosome	KEGG PATHWAY	ko03010	9	98	0.504992	0.89497	g6840|g850|g3092|g6087|g5720|g570|g7651|g207|g2460	http://www.genome.jp/kegg-bin/show_pathway?ko03010/K02918%09red/K02908%09red/K02951%09red/K02928%09red/K02917%09red/K02921%09red/K02943%09red/K02962%09red/K02960%09red	Translation	Genetic Information Processing
Dopaminergic synapse	KEGG PATHWAY	ko04728	2	19	0.516916	0.89497	g3|g8184	http://www.genome.jp/kegg-bin/show_pathway?ko04728/K04441%09red/K00545%09red	Nervous system	Organismal Systems
Fatty acid metabolism	KEGG PATHWAY	ko01212	3	31	0.528071	0.89497	g6026|g3675|g1718	http://www.genome.jp/kegg-bin/show_pathway?ko01212/K07513%09red/K00059%09red	Global and overview maps	Metabolism
Mineral absorption	KEGG PATHWAY	ko04978	1	8	0.532886	0.89497	g5461	http://www.genome.jp/kegg-bin/show_pathway?ko04978/K14688%09red	Digestive system	Organismal Systems
Ascorbate and aldarate metabolism	KEGG PATHWAY	ko00053	1	8	0.532886	0.89497	g5386	http://www.genome.jp/kegg-bin/show_pathway?ko00053/K00128%09red	Carbohydrate metabolism	Metabolism
RIG-I-like receptor signaling pathway	KEGG PATHWAY	ko04622	1	8	0.532886	0.89497	g3	http://www.genome.jp/kegg-bin/show_pathway?ko04622/K04441%09red	Immune system	Organismal Systems
Selenocompound metabolism	KEGG PATHWAY	ko00450	1	8	0.532886	0.89497	g6493	http://www.genome.jp/kegg-bin/show_pathway?ko00450/K00549%09red	Metabolism of other amino acids	Metabolism
Prolactin signaling pathway	KEGG PATHWAY	ko04917	1	8	0.532886	0.89497	g3	http://www.genome.jp/kegg-bin/show_pathway?ko04917/K04441%09red	Endocrine system	Organismal Systems
Bile secretion	KEGG PATHWAY	ko04976	1	8	0.532886	0.89497	g2661	http://www.genome.jp/kegg-bin/show_pathway?ko04976/K05658%09red	Digestive system	Organismal Systems
Melanogenesis	KEGG PATHWAY	ko04916	1	8	0.532886	0.89497	g8082	http://www.genome.jp/kegg-bin/show_pathway?ko04916/K00505%09red	Endocrine system	Organismal Systems
Vitamin B6 metabolism	KEGG PATHWAY	ko00750	1	8	0.532886	0.89497	g4221	http://www.genome.jp/kegg-bin/show_pathway?ko00750/K01733%09red	Metabolism of cofactors and vitamins	Metabolism
2-Oxocarboxylic acid metabolism	KEGG PATHWAY	ko01210	4	43	0.535974	0.89497	g7490|g3169|g4545|g7218	http://www.genome.jp/kegg-bin/show_pathway?ko01210/K14454%09red/K00052%09red/K01647%09red	Global and overview maps	Metabolism
Pyruvate metabolism	KEGG PATHWAY	ko00620	3	32	0.548107	0.895422	g5386|g2101|g1243	http://www.genome.jp/kegg-bin/show_pathway?ko00620/K00128%09red/K00027%09red/K00101%09red	Carbohydrate metabolism	Metabolism
MAPK signaling pathway	KEGG PATHWAY	ko04010	2	21	0.566947	0.896968	g740|g3	http://www.genome.jp/kegg-bin/show_pathway?ko04010/K04441%09red/K04459%09red	Signal transduction	Environmental Information Processing
Riboflavin metabolism	KEGG PATHWAY	ko00740	1	9	0.570798	0.896968	g8082	http://www.genome.jp/kegg-bin/show_pathway?ko00740/K00505%09red	Metabolism of cofactors and vitamins	Metabolism
Platelet activation	KEGG PATHWAY	ko04611	1	9	0.570798	0.896968	g3	http://www.genome.jp/kegg-bin/show_pathway?ko04611/K04441%09red	Immune system	Organismal Systems
Inflammatory mediator regulation of TRP channels	KEGG PATHWAY	ko04750	1	9	0.570798	0.896968	g3	http://www.genome.jp/kegg-bin/show_pathway?ko04750/K04441%09red	Sensory system	Organismal Systems
Purine metabolism	KEGG PATHWAY	ko00230	8	93	0.580773	0.904033	g6966|g6852|g914|g4094|g209|g4799|g5807|g6839	http://www.genome.jp/kegg-bin/show_pathway?ko00230/K00856%09red/K01466%09red/K03005%09red/K01488%09red/K03000%09red/K00106%09red/K00365%09red/K01427%09red	Nucleotide metabolism	Metabolism
Drug metabolism - other enzymes	KEGG PATHWAY	ko00983	1	10	0.605638	0.916792	g5807	http://www.genome.jp/kegg-bin/show_pathway?ko00983/K00106%09red	Xenobiotics biodegradation and metabolism	Metabolism
Benzoate degradation	KEGG PATHWAY	ko00362	1	10	0.605638	0.916792	g6886	http://www.genome.jp/kegg-bin/show_pathway?ko00362/K03381%09red	Xenobiotics biodegradation and metabolism	Metabolism
Fc epsilon RI signaling pathway	KEGG PATHWAY	ko04664	1	10	0.605638	0.916792	g3	http://www.genome.jp/kegg-bin/show_pathway?ko04664/K04441%09red	Immune system	Organismal Systems
Bisphenol degradation	KEGG PATHWAY	ko00363	2	23	0.613132	0.919699	g1980|g8057	http://www.genome.jp/kegg-bin/show_pathway?ko00363/K00100%09red	Xenobiotics biodegradation and metabolism	Metabolism
Adherens junction	KEGG PATHWAY	ko04520	1	11	0.637655	0.922922	g5420	http://www.genome.jp/kegg-bin/show_pathway?ko04520/K05747%09red	Cellular community - eukaryotes	Cellular Processes
Limonene and pinene degradation	KEGG PATHWAY	ko00903	1	11	0.637655	0.922922	g5386	http://www.genome.jp/kegg-bin/show_pathway?ko00903/K00128%09red	Metabolism of terpenoids and polyketides	Metabolism
Rap1 signaling pathway	KEGG PATHWAY	ko04015	1	11	0.637655	0.922922	g3	http://www.genome.jp/kegg-bin/show_pathway?ko04015/K04441%09red	Signal transduction	Environmental Information Processing
VEGF signaling pathway	KEGG PATHWAY	ko04370	1	11	0.637655	0.922922	g3	http://www.genome.jp/kegg-bin/show_pathway?ko04370/K04441%09red	Signal transduction	Environmental Information Processing
Adrenergic signaling in cardiomyocytes	KEGG PATHWAY	ko04261	1	12	0.667078	0.941586	g3	http://www.genome.jp/kegg-bin/show_pathway?ko04261/K04441%09red	Circulatory system	Organismal Systems
T cell receptor signaling pathway	KEGG PATHWAY	ko04660	1	13	0.694115	0.941586	g3	http://www.genome.jp/kegg-bin/show_pathway?ko04660/K04441%09red	Immune system	Organismal Systems
PI3K-Akt signaling pathway	KEGG PATHWAY	ko04151	2	28	0.711903	0.941586	g8253|g8319	http://www.genome.jp/kegg-bin/show_pathway?ko04151/K09420%09red	Signal transduction	Environmental Information Processing
Lysine degradation	KEGG PATHWAY	ko00310	2	28	0.711903	0.941586	g5386|g3035	http://www.genome.jp/kegg-bin/show_pathway?ko00310/K00128%09red/K01843%09red	Amino acid metabolism	Metabolism
Carbon fixation pathways in prokaryotes	KEGG PATHWAY	ko00720	1	14	0.718961	0.941586	g285	http://www.genome.jp/kegg-bin/show_pathway?ko00720/K00297%09red	Energy metabolism	Metabolism
Histidine metabolism	KEGG PATHWAY	ko00340	1	14	0.718961	0.941586	g5386	http://www.genome.jp/kegg-bin/show_pathway?ko00340/K00128%09red	Amino acid metabolism	Metabolism
N-Glycan biosynthesis	KEGG PATHWAY	ko00510	2	29	0.728918	0.941586	g5307|g1666	http://www.genome.jp/kegg-bin/show_pathway?ko00510/K01230%09red	Glycan biosynthesis and metabolism	Metabolism
RNA polymerase	KEGG PATHWAY	ko03020	2	29	0.728918	0.941586	g4094|g6839	http://www.genome.jp/kegg-bin/show_pathway?ko03020/K03005%09red/K03000%09red	Transcription	Genetic Information Processing
MAPK signaling pathway - yeast	KEGG PATHWAY	ko04011	2	29	0.728918	0.941586	g7249|g3	http://www.genome.jp/kegg-bin/show_pathway?ko04011/K04441%09red/K11213%09red	Signal transduction	Environmental Information Processing
Meiosis - yeast	KEGG PATHWAY	ko04113	4	58	0.751659	0.941586	g6348|g7513|g2333|g555	http://www.genome.jp/kegg-bin/show_pathway?ko04113/K12769%09red/K12763%09red/K12767%09red/K08139%09red	Cell growth and death	Cellular Processes
Chemokine signaling pathway	KEGG PATHWAY	ko04062	1	16	0.762772	0.941586	g5420	http://www.genome.jp/kegg-bin/show_pathway?ko04062/K05747%09red	Immune system	Organismal Systems
GnRH signaling pathway	KEGG PATHWAY	ko04912	1	16	0.762772	0.941586	g3	http://www.genome.jp/kegg-bin/show_pathway?ko04912/K04441%09red	Endocrine system	Organismal Systems
Neurotrophin signaling pathway	KEGG PATHWAY	ko04722	1	16	0.762772	0.941586	g3	http://www.genome.jp/kegg-bin/show_pathway?ko04722/K04441%09red	Nervous system	Organismal Systems
PPAR signaling pathway	KEGG PATHWAY	ko03320	1	16	0.762772	0.941586	g6026	http://www.genome.jp/kegg-bin/show_pathway?ko03320/K07513%09red	Endocrine system	Organismal Systems
Regulation of mitophagy - yeast	KEGG PATHWAY	ko04139	2	32	0.774918	0.941586	g2903|g3	http://www.genome.jp/kegg-bin/show_pathway?ko04139/K08341%09red/K04441%09red	_	_
Thyroid hormone signaling pathway	KEGG PATHWAY	ko04919	1	17	0.78205	0.941586	g814	http://www.genome.jp/kegg-bin/show_pathway?ko04919/K01114%09red	Endocrine system	Organismal Systems
Sulfur metabolism	KEGG PATHWAY	ko00920	1	17	0.78205	0.941586	g5422	http://www.genome.jp/kegg-bin/show_pathway?ko00920/K01738%09red	Energy metabolism	Metabolism
Citrate cycle (TCA cycle)	KEGG PATHWAY	ko00020	2	33	0.788665	0.941586	g7490|g917	http://www.genome.jp/kegg-bin/show_pathway?ko00020/K01900%09red/K01647%09red	Carbohydrate metabolism	Metabolism
SNARE interactions in vesicular transport	KEGG PATHWAY	ko04130	1	18	0.799764	0.941586	g5618	http://www.genome.jp/kegg-bin/show_pathway?ko04130/K08490%09red	Folding, sorting and degradation	Genetic Information Processing
Two-component system	KEGG PATHWAY	ko02020	1	19	0.816041	0.941586	g1243	http://www.genome.jp/kegg-bin/show_pathway?ko02020/K00027%09red	Signal transduction	Environmental Information Processing
Valine, leucine and isoleucine biosynthesis	KEGG PATHWAY	ko00290	1	19	0.816041	0.941586	g4545	http://www.genome.jp/kegg-bin/show_pathway?ko00290/K00052%09red	Amino acid metabolism	Metabolism
Progesterone-mediated oocyte maturation	KEGG PATHWAY	ko04914	1	20	0.830997	0.952184	g3	http://www.genome.jp/kegg-bin/show_pathway?ko04914/K04441%09red	Endocrine system	Organismal Systems
Sphingolipid signaling pathway	KEGG PATHWAY	ko04071	1	23	0.868969	0.974085	g3	http://www.genome.jp/kegg-bin/show_pathway?ko04071/K04441%09red	Signal transduction	Environmental Information Processing
Fc gamma R-mediated phagocytosis	KEGG PATHWAY	ko04666	1	24	0.879628	0.974085	g5420	http://www.genome.jp/kegg-bin/show_pathway?ko04666/K05747%09red	Immune system	Organismal Systems
Insulin signaling pathway	KEGG PATHWAY	ko04910	1	27	0.906689	0.984235	g6021	http://www.genome.jp/kegg-bin/show_pathway?ko04910/K00844%09red	Endocrine system	Organismal Systems
Regulation of actin cytoskeleton	KEGG PATHWAY	ko04810	1	27	0.906689	0.984235	g5420	http://www.genome.jp/kegg-bin/show_pathway?ko04810/K05747%09red	Cell motility	Cellular Processes
Pyrimidine metabolism	KEGG PATHWAY	ko00240	3	65	0.922221	0.988094	g4094|g6839|g4066	http://www.genome.jp/kegg-bin/show_pathway?ko00240/K03005%09red/K00761%09red/K03000%09red	Nucleotide metabolism	Metabolism
Basal transcription factors	KEGG PATHWAY	ko03022	1	31	0.933565	0.993149	g7757	http://www.genome.jp/kegg-bin/show_pathway?ko03022/K03135%09red	Transcription	Genetic Information Processing
Aminobenzoate degradation	KEGG PATHWAY	ko00627	1	32	0.938977	0.993149	g686	http://www.genome.jp/kegg-bin/show_pathway?ko00627/K03380%09red	Xenobiotics biodegradation and metabolism	Metabolism
Ubiquitin mediated proteolysis	KEGG PATHWAY	ko04120	2	54	0.94845	0.996778	g6690|g8061	http://www.genome.jp/kegg-bin/show_pathway?ko04120/K10576%09red/K10582%09red	Folding, sorting and degradation	Genetic Information Processing
Phagosome	KEGG PATHWAY	ko04145	1	36	0.956566	0.998945	g4522	http://www.genome.jp/kegg-bin/show_pathway?ko04145/K08008%09red	Transport and catabolism	Cellular Processes
Aminoacyl-tRNA biosynthesis	KEGG PATHWAY	ko00970	1	38	0.963359	0.999569	g2301	http://www.genome.jp/kegg-bin/show_pathway?ko00970/K01867%09red	Translation	Genetic Information Processing
Protein processing in endoplasmic reticulum	KEGG PATHWAY	ko04141	2	72	0.985918	0.999569	g5307|g1666	http://www.genome.jp/kegg-bin/show_pathway?ko04141/K01230%09red	Folding, sorting and degradation	Genetic Information Processing
Endocytosis	KEGG PATHWAY	ko04144	1	71	0.997804	0.999569	g5420	http://www.genome.jp/kegg-bin/show_pathway?ko04144/K05747%09red	Transport and catabolism	Cellular Processes
Oxidative phosphorylation	KEGG PATHWAY	ko00190	1	77	0.998686	0.999569	g7744	http://www.genome.jp/kegg-bin/show_pathway?ko00190/K01535%09red	Energy metabolism	Metabolism
RNA transport	KEGG PATHWAY	ko03013	1	90	0.999569	0.999569	g2517	http://www.genome.jp/kegg-bin/show_pathway?ko03013/K03236%09red	Translation	Genetic Information Processing

## Sheet: Sample84H_1M_vs_Sample84H_0M.DE
#Term	Database	Id	Sample number	Background number	P-Value	Corrected P-Value	Genes	Hyperlink	typeII	typeI
Tyrosine metabolism	KEGG PATHWAY	ko00350	14	42	8.61636e-06	0.000973649	g8082|g2023|g5063|g3169|g4234|g7298|g4236|g5390|g4233|g7218|g6036|g2636|g7236|g3965	http://www.genome.jp/kegg-bin/show_pathway?ko00350/K00276%09red/K14454%09red/K00451%09red/K01555%09red/K00129%09red/K00457%09red/K13953%09red/K00505%09red	Amino acid metabolism	Metabolism
Pentose and glucuronate interconversions	KEGG PATHWAY	ko00040	11	35	0.000124198	0.00701717	g5791|g8282|g5679|g3210|g4563|g7711|g2097|g86|g5006|g6447|g6866	http://www.genome.jp/kegg-bin/show_pathway?ko00040/K00065%09red/K00002%09red/K01195%09red/K00008%09red/K00128%09red/K18103%09red/K05351%09red/K17818%09red	Carbohydrate metabolism	Metabolism
Carbon metabolism	KEGG PATHWAY	ko01200	22	128	0.000232228	0.00874725	g131|g5460|g8222|g242|g263|g5786|g2127|g3480|g7951|g3796|g7218|g2605|g2767|g4364|g4165|g251|g252|g8140|g6729|g1243|g3169|g5422	http://www.genome.jp/kegg-bin/show_pathway?ko01200/K03781%09red/K03396%09red/K17100%09red/K01803%09red/K01455%09red/K14454%09red/K00140%09red/K01895%09red/K00161%09red/K00033%09red/K00249%09red/K01808%09red/K17069%09red/K00925%09red/K00027%09red/K17066%09red/K01647%09red/K01738%09red	Global and overview maps	Metabolism
Phenylalanine metabolism	KEGG PATHWAY	ko00360	9	29	0.000554365	0.0156608	g2023|g5063|g3169|g7298|g4236|g7218|g6036|g2636|g7236	http://www.genome.jp/kegg-bin/show_pathway?ko00360/K00129%09red/K00276%09red/K14454%09red/K00457%09red	Amino acid metabolism	Metabolism
Glycolysis / Gluconeogenesis	KEGG PATHWAY	ko00010	12	52	0.000697834	0.015771	g3972|g437|g4891|g7711|g4165|g86|g3965|g2605|g6866|g2636|g7236|g251	http://www.genome.jp/kegg-bin/show_pathway?ko00010/K00002%09red/K01803%09red/K00161%09red/K00128%09red/K00129%09red/K01785%09red/K01568%09red/K13953%09red/K01895%09red	Carbohydrate metabolism	Metabolism
beta-Alanine metabolism	KEGG PATHWAY	ko00410	7	22	0.00203668	0.0383575	g4364|g7298|g8140|g6036|g6866|g2636|g7236	http://www.genome.jp/kegg-bin/show_pathway?ko00410/K00249%09red/K00129%09red/K00276%09red/K00140%09red/K00128%09red	Metabolism of other amino acids	Metabolism
Starch and sucrose metabolism	KEGG PATHWAY	ko00500	11	53	0.00241065	0.0389147	g2033|g2034|g8053|g3071|g1557|g5859|g6982|g5006|g19|g7969|g1007	http://www.genome.jp/kegg-bin/show_pathway?ko00500/K01193%09red/K01187%09red/K15920%09red/K01195%09red/K01210%09red/K05349%09red/K00697%09red	Carbohydrate metabolism	Metabolism
Tryptophan metabolism	KEGG PATHWAY	ko00380	9	41	0.00427009	0.0603151	g3065|g3207|g5460|g5786|g7246|g8222|g242|g1338|g6866	http://www.genome.jp/kegg-bin/show_pathway?ko00380/K03781%09red/K00128%09red/K00463%09red/K00493%09red	Amino acid metabolism	Metabolism
Inositol phosphate metabolism	KEGG PATHWAY	ko00562	6	21	0.00656434	0.0824189	g4536|g4364|g251|g259|g582|g583	http://www.genome.jp/kegg-bin/show_pathway?ko00562/K00010%09red/K00140%09red/K01803%09red/K00469%09red	Carbohydrate metabolism	Metabolism
Isoquinoline alkaloid biosynthesis	KEGG PATHWAY	ko00950	5	15	0.00765941	0.0865513	g8082|g3169|g7298|g6036|g7218	http://www.genome.jp/kegg-bin/show_pathway?ko00950/K00276%09red/K14454%09red/K00505%09red	Biosynthesis of other secondary metabolites	Metabolism
Carbon fixation in photosynthetic organisms	KEGG PATHWAY	ko00710	6	24	0.0111731	0.102768	g3169|g3479|g7725|g251|g252|g7218	http://www.genome.jp/kegg-bin/show_pathway?ko00710/K01808%09red/K01621%09red/K01803%09red/K14454%09red	Energy metabolism	Metabolism
Pyruvate metabolism	KEGG PATHWAY	ko00620	7	32	0.0114752	0.102768	g2101|g3480|g6866|g7956|g4165|g2605|g1243	http://www.genome.jp/kegg-bin/show_pathway?ko00620/K00161%09red/K00128%09red/K00925%09red/K00027%09red/K01895%09red/K00101%09red	Carbohydrate metabolism	Metabolism
Propanoate metabolism	KEGG PATHWAY	ko00640	6	25	0.0131186	0.105885	g4364|g6726|g3480|g8140|g2605|g1514	http://www.genome.jp/kegg-bin/show_pathway?ko00640/K00140%09red/K00166%09red/K00249%09red/K00925%09red/K18369%09red/K01895%09red	Carbohydrate metabolism	Metabolism
Cyanoamino acid metabolism	KEGG PATHWAY	ko00460	5	18	0.0141642	0.106703	g131|g3071|g2343|g19|g6982	http://www.genome.jp/kegg-bin/show_pathway?ko00460/K05349%09red/K10675%09red/K01455%09red	Metabolism of other amino acids	Metabolism
Tropane, piperidine and pyridine alkaloid biosynthesis	KEGG PATHWAY	ko00960	4	13	0.021021	0.14575	g3169|g7298|g6036|g7218	http://www.genome.jp/kegg-bin/show_pathway?ko00960/K00276%09red/K14454%09red	Biosynthesis of other secondary metabolites	Metabolism
Peroxisome	KEGG PATHWAY	ko04146	10	65	0.021927	0.14575	g3949|g5786|g5460|g8222|g6637|g242|g1925|g7771|g1664|g1293	http://www.genome.jp/kegg-bin/show_pathway?ko04146/K03781%09red/K13348%09red/K00273%09red/K12261%09red/K01796%09red/K04564%09red/K00624%09red	Transport and catabolism	Cellular Processes
Metabolism of xenobiotics by cytochrome P450	KEGG PATHWAY	ko00980	5	22	0.0274897	0.154732	g8182|g4219|g3965|g7236|g2636	http://www.genome.jp/kegg-bin/show_pathway?ko00980/K00129%09red/K13953%09red/K01253%09red/K00799%09red	Xenobiotics biodegradation and metabolism	Metabolism
Phenylalanine, tyrosine and tryptophan biosynthesis	KEGG PATHWAY	ko00400	5	22	0.0274897	0.154732	g3169|g7218|g2021|g2019|g3413	http://www.genome.jp/kegg-bin/show_pathway?ko00400/K09484%09red/K14454%09red/K01626%09red/K03786%09red	Amino acid metabolism	Metabolism
Chloroalkane and chloroalkene degradation	KEGG PATHWAY	ko00625	6	31	0.0299056	0.154732	g722|g5305|g3965|g6866|g4736|g1736	http://www.genome.jp/kegg-bin/show_pathway?ko00625/K00128%09red/K13953%09red/K00100%09red	Xenobiotics biodegradation and metabolism	Metabolism
Toluene degradation	KEGG PATHWAY	ko00623	3	8	0.0301248	0.154732	g686|g6867|g4575	http://www.genome.jp/kegg-bin/show_pathway?ko00623/K03380%09red	Xenobiotics biodegradation and metabolism	Metabolism
Arginine and proline metabolism	KEGG PATHWAY	ko00330	7	41	0.0334072	0.164131	g3169|g6731|g5395|g6637|g7218|g6866|g5227	http://www.genome.jp/kegg-bin/show_pathway?ko00330/K14454%09red/K00273%09red/K00294%09red/K00128%09red/K00819%09red/K01480%09red	Amino acid metabolism	Metabolism
Fructose and mannose metabolism	KEGG PATHWAY	ko00051	8	53	0.0416932	0.196306	g5791|g6054|g722|g5305|g1736|g252|g4736|g251	http://www.genome.jp/kegg-bin/show_pathway?ko00051/K01808%09red/K01803%09red/K12661%09red/K00100%09red/K00008%09red	Carbohydrate metabolism	Metabolism
Methane metabolism	KEGG PATHWAY	ko00680	5	26	0.0468835	0.198538	g3480|g2767|g2605|g7951|g263	http://www.genome.jp/kegg-bin/show_pathway?ko00680/K03396%09red/K17100%09red/K17066%09red/K01895%09red/K00925%09red	Energy metabolism	Metabolism
Ubiquinone and other terpenoid-quinone biosynthesis	KEGG PATHWAY	ko00130	3	10	0.0474383	0.198538	g2023|g4236|g5063	http://www.genome.jp/kegg-bin/show_pathway?ko00130/K00457%09red	Metabolism of cofactors and vitamins	Metabolism
Phenylpropanoid biosynthesis	KEGG PATHWAY	ko00940	3	10	0.0474383	0.198538	g3071|g19|g6982	http://www.genome.jp/kegg-bin/show_pathway?ko00940/K05349%09red	Biosynthesis of other secondary metabolites	Metabolism
Drug metabolism - cytochrome P450	KEGG PATHWAY	ko00982	4	18	0.0501105	0.202232	g4219|g3965|g7236|g2636	http://www.genome.jp/kegg-bin/show_pathway?ko00982/K00129%09red/K13953%09red/K00799%09red	Xenobiotics biodegradation and metabolism	Metabolism
FoxO signaling pathway	KEGG PATHWAY	ko04068	5	27	0.0527342	0.205482	g8222|g1664|g5460|g5786|g242	http://www.genome.jp/kegg-bin/show_pathway?ko04068/K03781%09red/K04564%09red	Signal transduction	Environmental Information Processing
Galactose metabolism	KEGG PATHWAY	ko00052	5	28	0.0589908	0.222199	g3090|g1557|g4891|g8053|g1007	http://www.genome.jp/kegg-bin/show_pathway?ko00052/K01193%09red/K01785%09red/K01684%09red/K01187%09red	Carbohydrate metabolism	Metabolism
Chlorocyclohexane and chlorobenzene degradation	KEGG PATHWAY	ko00361	3	12	0.0686143	0.242294	g686|g6867|g4575	http://www.genome.jp/kegg-bin/show_pathway?ko00361/K03380%09red	Xenobiotics biodegradation and metabolism	Metabolism
Linoleic acid metabolism	KEGG PATHWAY	ko00591	4	21	0.0745274	0.2552	g722|g5305|g1736|g4736	http://www.genome.jp/kegg-bin/show_pathway?ko00591/K00100%09red	Lipid metabolism	Metabolism
Glyoxylate and dicarboxylate metabolism	KEGG PATHWAY	ko00630	6	42	0.0876177	0.278261	g5786|g2127|g5460|g8222|g131|g242	http://www.genome.jp/kegg-bin/show_pathway?ko00630/K03781%09red/K01455%09red/K01647%09red	Carbohydrate metabolism	Metabolism
Aminobenzoate degradation	KEGG PATHWAY	ko00627	5	32	0.0880347	0.278261	g686|g3207|g4575|g6867|g3277	http://www.genome.jp/kegg-bin/show_pathway?ko00627/K14333%09red/K03380%09red/K00493%09red	Xenobiotics biodegradation and metabolism	Metabolism
Caprolactam degradation	KEGG PATHWAY	ko00930	2	6	0.0903847	0.278261	g86|g7711	http://www.genome.jp/kegg-bin/show_pathway?ko00930/K00002%09red	Xenobiotics biodegradation and metabolism	Metabolism
Histidine metabolism	KEGG PATHWAY	ko00340	3	14	0.0932987	0.278261	g6866|g2636|g7236	http://www.genome.jp/kegg-bin/show_pathway?ko00340/K00128%09red/K00129%09red	Amino acid metabolism	Metabolism
Bisphenol degradation	KEGG PATHWAY	ko00363	4	23	0.0935746	0.278261	g722|g5305|g1736|g4736	http://www.genome.jp/kegg-bin/show_pathway?ko00363/K00100%09red	Xenobiotics biodegradation and metabolism	Metabolism
Styrene degradation	KEGG PATHWAY	ko00643	3	15	0.106822	0.309511	g4234|g5390|g4233	http://www.genome.jp/kegg-bin/show_pathway?ko00643/K00451%09red/K01555%09red	Xenobiotics biodegradation and metabolism	Metabolism
Cysteine and methionine metabolism	KEGG PATHWAY	ko00270	6	45	0.109738	0.31001	g3169|g1624|g3085|g3796|g7218|g5422	http://www.genome.jp/kegg-bin/show_pathway?ko00270/K01738%09red/K00641%09red/K17069%09red/K14454%09red/K00456%09red	Amino acid metabolism	Metabolism
Alanine, aspartate and glutamate metabolism	KEGG PATHWAY	ko00250	5	35	0.113877	0.311106	g6731|g3169|g7218|g6542|g1031	http://www.genome.jp/kegg-bin/show_pathway?ko00250/K00294%09red/K14454%09red/K00139%09red/K01953%09red	Amino acid metabolism	Metabolism
Streptomycin biosynthesis	KEGG PATHWAY	ko00521	3	16	0.121055	0.311106	g4536|g259|g582	http://www.genome.jp/kegg-bin/show_pathway?ko00521/K00010%09red	Biosynthesis of other secondary metabolites	Metabolism
Valine, leucine and isoleucine degradation	KEGG PATHWAY	ko00280	5	36	0.123216	0.311106	g4364|g6866|g6726|g609|g8140	http://www.genome.jp/kegg-bin/show_pathway?ko00280/K00249%09red/K00128%09red/K00140%09red/K00166%09red/K00020%09red	Amino acid metabolism	Metabolism
Degradation of aromatic compounds	KEGG PATHWAY	ko01220	4	26	0.125945	0.311106	g86|g7711|g3276|g3965	http://www.genome.jp/kegg-bin/show_pathway?ko01220/K13953%09red/K00480%09red/K00002%09red	Global and overview maps	Metabolism
Ascorbate and aldarate metabolism	KEGG PATHWAY	ko00053	2	8	0.13348	0.311106	g6866|g583	http://www.genome.jp/kegg-bin/show_pathway?ko00053/K00128%09red/K00469%09red	Carbohydrate metabolism	Metabolism
Taurine and hypotaurine metabolism	KEGG PATHWAY	ko00430	2	8	0.13348	0.311106	g3085|g3480	http://www.genome.jp/kegg-bin/show_pathway?ko00430/K00925%09red/K00456%09red	Metabolism of other amino acids	Metabolism
Bile secretion	KEGG PATHWAY	ko04976	2	8	0.13348	0.311106	g8182|g6824	http://www.genome.jp/kegg-bin/show_pathway?ko04976/K05658%09red/K01253%09red	Digestive system	Organismal Systems
Sulfur metabolism	KEGG PATHWAY	ko00920	3	17	0.135937	0.311106	g3796|g1083|g5422	http://www.genome.jp/kegg-bin/show_pathway?ko00920/K00390%09red/K17069%09red/K01738%09red	Energy metabolism	Metabolism
Pentose phosphate pathway	KEGG PATHWAY	ko00030	4	27	0.137657	0.311106	g7725|g3479|g6729|g252	http://www.genome.jp/kegg-bin/show_pathway?ko00030/K01808%09red/K01621%09red/K00033%09red	Carbohydrate metabolism	Metabolism
Fatty acid degradation	KEGG PATHWAY	ko00071	4	28	0.149789	0.331886	g3207|g6866|g3965|g8140	http://www.genome.jp/kegg-bin/show_pathway?ko00071/K00249%09red/K00128%09red/K13953%09red/K00493%09red	Lipid metabolism	Metabolism
Glycerolipid metabolism	KEGG PATHWAY	ko00561	4	29	0.162313	0.349381	g86|g6866|g7711|g5115	http://www.genome.jp/kegg-bin/show_pathway?ko00561/K00128%09red/K01046%09red/K00002%09red	Lipid metabolism	Metabolism
Butanoate metabolism	KEGG PATHWAY	ko00650	5	40	0.163869	0.349381	g1031|g722|g5305|g1736|g4736	http://www.genome.jp/kegg-bin/show_pathway?ko00650/K00139%09red/K00100%09red	Carbohydrate metabolism	Metabolism
Adherens junction	KEGG PATHWAY	ko04520	2	11	0.204198	0.427303	g5420|g4513	http://www.genome.jp/kegg-bin/show_pathway?ko04520/K05747%09red	Cellular community - eukaryotes	Cellular Processes
Biosynthesis of amino acids	KEGG PATHWAY	ko01230	11	125	0.265259	0.544987	g3169|g2019|g2127|g3796|g4545|g251|g252|g7218|g5422|g4721|g3413	http://www.genome.jp/kegg-bin/show_pathway?ko01230/K01808%09red/K14454%09red/K03786%09red/K01803%09red/K00052%09red/K01620%09red/K17069%09red/K01626%09red/K01647%09red/K01738%09red	Global and overview maps	Metabolism
Carbon fixation pathways in prokaryotes	KEGG PATHWAY	ko00720	2	14	0.277929	0.560821	g3480|g2605	http://www.genome.jp/kegg-bin/show_pathway?ko00720/K01895%09red/K00925%09red	Energy metabolism	Metabolism
Glycine, serine and threonine metabolism	KEGG PATHWAY	ko00260	5	50	0.283063	0.56116	g6637|g7298|g6036|g1898|g4721	http://www.genome.jp/kegg-bin/show_pathway?ko00260/K01620%09red/K00276%09red/K00108%09red/K00273%09red	Amino acid metabolism	Metabolism
Cytosolic DNA-sensing pathway	KEGG PATHWAY	ko04623	2	15	0.302546	0.589443	g1321|g2562	http://www.genome.jp/kegg-bin/show_pathway?ko04623/K03025%09red/K03027%09red	Immune system	Organismal Systems
Chemokine signaling pathway	KEGG PATHWAY	ko04062	2	16	0.327012	0.605776	g5420|g4513	http://www.genome.jp/kegg-bin/show_pathway?ko04062/K05747%09red	Immune system	Organismal Systems
PPAR signaling pathway	KEGG PATHWAY	ko03320	2	16	0.327012	0.605776	g7618|g8140	http://www.genome.jp/kegg-bin/show_pathway?ko03320/K00249%09red/K00507%09red	Endocrine system	Organismal Systems
Glutathione metabolism	KEGG PATHWAY	ko00480	3	29	0.343584	0.626209	g4219|g1378|g6729	http://www.genome.jp/kegg-bin/show_pathway?ko00480/K00033%09red/K00799%09red/K01469%09red	Metabolism of other amino acids	Metabolism
Nitrogen metabolism	KEGG PATHWAY	ko00910	2	17	0.351242	0.630005	g1881|g131	http://www.genome.jp/kegg-bin/show_pathway?ko00910/K01455%09red/K02575%09red	Energy metabolism	Metabolism
2-Oxocarboxylic acid metabolism	KEGG PATHWAY	ko01210	4	43	0.362941	0.63274	g2127|g3169|g4545|g7218	http://www.genome.jp/kegg-bin/show_pathway?ko01210/K01647%09red/K00052%09red/K14454%09red	Global and overview maps	Metabolism
C5-Branched dibasic acid metabolism	KEGG PATHWAY	ko00660	1	6	0.374371	0.63274	g4545	http://www.genome.jp/kegg-bin/show_pathway?ko00660/K00052%09red	Carbohydrate metabolism	Metabolism
ABC transporters	KEGG PATHWAY	ko02010	1	6	0.374371	0.63274	g6824	http://www.genome.jp/kegg-bin/show_pathway?ko02010/K05658%09red	Membrane transport	Environmental Information Processing
Naphthalene degradation	KEGG PATHWAY	ko00626	2	18	0.375165	0.63274	g3965|g3276	http://www.genome.jp/kegg-bin/show_pathway?ko00626/K13953%09red/K00480%09red	Xenobiotics biodegradation and metabolism	Metabolism
Porphyrin and chlorophyll metabolism	KEGG PATHWAY	ko00860	2	19	0.398718	0.652973	g7983|g5006	http://www.genome.jp/kegg-bin/show_pathway?ko00860/K13624%09red/K01195%09red	Metabolism of cofactors and vitamins	Metabolism
Mineral absorption	KEGG PATHWAY	ko04978	1	8	0.452885	0.682347	g7557	http://www.genome.jp/kegg-bin/show_pathway?ko04978/K14688%09red	Digestive system	Organismal Systems
Geraniol degradation	KEGG PATHWAY	ko00281	1	8	0.452885	0.682347	g5753	http://www.genome.jp/kegg-bin/show_pathway?ko00281/K00257%09red	Metabolism of terpenoids and polyketides	Metabolism
Retinol metabolism	KEGG PATHWAY	ko00830	1	8	0.452885	0.682347	g3965	http://www.genome.jp/kegg-bin/show_pathway?ko00830/K13953%09red	Metabolism of cofactors and vitamins	Metabolism
Melanogenesis	KEGG PATHWAY	ko04916	1	8	0.452885	0.682347	g8082	http://www.genome.jp/kegg-bin/show_pathway?ko04916/K00505%09red	Endocrine system	Organismal Systems
Arginine biosynthesis	KEGG PATHWAY	ko00220	2	22	0.466679	0.693878	g3169|g7218	http://www.genome.jp/kegg-bin/show_pathway?ko00220/K14454%09red	Amino acid metabolism	Metabolism
Riboflavin metabolism	KEGG PATHWAY	ko00740	1	9	0.488375	0.707517	g8082	http://www.genome.jp/kegg-bin/show_pathway?ko00740/K00505%09red	Metabolism of cofactors and vitamins	Metabolism
Fc gamma R-mediated phagocytosis	KEGG PATHWAY	ko04666	2	24	0.509383	0.726106	g5420|g4513	http://www.genome.jp/kegg-bin/show_pathway?ko04666/K05747%09red	Immune system	Organismal Systems
Drug metabolism - other enzymes	KEGG PATHWAY	ko00983	1	10	0.521567	0.726106	g5006	http://www.genome.jp/kegg-bin/show_pathway?ko00983/K01195%09red	Xenobiotics biodegradation and metabolism	Metabolism
Benzoate degradation	KEGG PATHWAY	ko00362	1	10	0.521567	0.726106	g3277	http://www.genome.jp/kegg-bin/show_pathway?ko00362/K14333%09red	Xenobiotics biodegradation and metabolism	Metabolism
Steroid biosynthesis	KEGG PATHWAY	ko00100	2	25	0.529882	0.726106	g5094|g1097	http://www.genome.jp/kegg-bin/show_pathway?ko00100/K05917%09red/K00223%09red	Lipid metabolism	Metabolism
Amino sugar and nucleotide sugar metabolism	KEGG PATHWAY	ko00520	4	55	0.5373	0.726106	g3842|g3839|g3542|g5859	http://www.genome.jp/kegg-bin/show_pathway?ko00520/K01443%09red/K00326%09red/K15920%09red/K02564%09red	Carbohydrate metabolism	Metabolism
Lysosome	KEGG PATHWAY	ko04142	2	26	0.54979	0.726106	g75|g5006	http://www.genome.jp/kegg-bin/show_pathway?ko04142/K01279%09red/K01195%09red	Transport and catabolism	Cellular Processes
Limonene and pinene degradation	KEGG PATHWAY	ko00903	1	11	0.552612	0.726106	g6866	http://www.genome.jp/kegg-bin/show_pathway?ko00903/K00128%09red	Metabolism of terpenoids and polyketides	Metabolism
Dioxin degradation	KEGG PATHWAY	ko00621	1	11	0.552612	0.726106	g3276	http://www.genome.jp/kegg-bin/show_pathway?ko00621/K00480%09red	Xenobiotics biodegradation and metabolism	Metabolism
Regulation of actin cytoskeleton	KEGG PATHWAY	ko04810	2	27	0.569099	0.739175	g5420|g4513	http://www.genome.jp/kegg-bin/show_pathway?ko04810/K05747%09red	Cell motility	Cellular Processes
Glucagon signaling pathway	KEGG PATHWAY	ko04922	1	12	0.581646	0.746886	g4165	http://www.genome.jp/kegg-bin/show_pathway?ko04922/K00161%09red	Endocrine system	Organismal Systems
Glycerophospholipid metabolism	KEGG PATHWAY	ko00564	3	44	0.595246	0.755762	g5858|g5086|g7284	http://www.genome.jp/kegg-bin/show_pathway?ko00564/K00006%09red/K13333%09red/K01613%09red	Lipid metabolism	Metabolism
RNA polymerase	KEGG PATHWAY	ko03020	2	29	0.605899	0.76074	g1321|g2562	http://www.genome.jp/kegg-bin/show_pathway?ko03020/K03025%09red/K03027%09red	Transcription	Genetic Information Processing
Fatty acid metabolism	KEGG PATHWAY	ko01212	2	31	0.640269	0.786417	g7618|g8140	http://www.genome.jp/kegg-bin/show_pathway?ko01212/K00249%09red/K00507%09red	Global and overview maps	Metabolism
Citrate cycle (TCA cycle)	KEGG PATHWAY	ko00020	2	33	0.672239	0.816806	g4165|g2127	http://www.genome.jp/kegg-bin/show_pathway?ko00020/K00161%09red/K01647%09red	Carbohydrate metabolism	Metabolism
Polycyclic aromatic hydrocarbon degradation	KEGG PATHWAY	ko00624	1	17	0.700934	0.825058	g3276	http://www.genome.jp/kegg-bin/show_pathway?ko00624/K00480%09red	Xenobiotics biodegradation and metabolism	Metabolism
Biosynthesis of unsaturated fatty acids	KEGG PATHWAY	ko01040	1	17	0.700934	0.825058	g7618	http://www.genome.jp/kegg-bin/show_pathway?ko01040/K00507%09red	Lipid metabolism	Metabolism
HIF-1 signaling pathway	KEGG PATHWAY	ko04066	1	18	0.720361	0.839184	g4165	http://www.genome.jp/kegg-bin/show_pathway?ko04066/K00161%09red	Signal transduction	Environmental Information Processing
Two-component system	KEGG PATHWAY	ko02020	1	19	0.738529	0.842968	g1243	http://www.genome.jp/kegg-bin/show_pathway?ko02020/K00027%09red	Signal transduction	Environmental Information Processing
Valine, leucine and isoleucine biosynthesis	KEGG PATHWAY	ko00290	1	19	0.738529	0.842968	g4545	http://www.genome.jp/kegg-bin/show_pathway?ko00290/K00052%09red	Amino acid metabolism	Metabolism
Meiosis - yeast	KEGG PATHWAY	ko04113	3	58	0.76582	0.865377	g500|g6348|g6901	http://www.genome.jp/kegg-bin/show_pathway?ko04113/K08139%09red	Cell growth and death	Cellular Processes
AMPK signaling pathway	KEGG PATHWAY	ko04152	1	23	0.800163	0.886455	g7618	http://www.genome.jp/kegg-bin/show_pathway?ko04152/K00507%09red	Signal transduction	Environmental Information Processing
Lysine degradation	KEGG PATHWAY	ko00310	1	28	0.857231	0.931415	g6866	http://www.genome.jp/kegg-bin/show_pathway?ko00310/K00128%09red	Amino acid metabolism	Metabolism
DNA replication	KEGG PATHWAY	ko03030	1	32	0.890928	0.958808	g349	http://www.genome.jp/kegg-bin/show_pathway?ko03030/K03469%09red	Replication and repair	Genetic Information Processing
Pyrimidine metabolism	KEGG PATHWAY	ko00240	2	65	0.937469	0.996966	g1321|g2562	http://www.genome.jp/kegg-bin/show_pathway?ko00240/K03025%09red/K03027%09red	Nucleotide metabolism	Metabolism
Endocytosis	KEGG PATHWAY	ko04144	2	71	0.955241	0.997693	g5420|g4513	http://www.genome.jp/kegg-bin/show_pathway?ko04144/K05747%09red	Transport and catabolism	Cellular Processes
Ubiquitin mediated proteolysis	KEGG PATHWAY	ko04120	1	54	0.975268	0.997693	g8061	http://www.genome.jp/kegg-bin/show_pathway?ko04120/K10582%09red	Folding, sorting and degradation	Genetic Information Processing
Purine metabolism	KEGG PATHWAY	ko00230	2	93	0.987376	0.997693	g1321|g2562	http://www.genome.jp/kegg-bin/show_pathway?ko00230/K03025%09red/K03027%09red	Nucleotide metabolism	Metabolism
Oxidative phosphorylation	KEGG PATHWAY	ko00190	1	77	0.994788	0.997693	g988	http://www.genome.jp/kegg-bin/show_pathway?ko00190/K02260%09red	Energy metabolism	Metabolism
Spliceosome	KEGG PATHWAY	ko03040	1	89	0.997693	0.997693	g230	http://www.genome.jp/kegg-bin/show_pathway?ko03040/K12823%09red	Transcription	Genetic Information Processing

## Sheet: Sample84H_1M_vs_Sample84H_3M.DE
#Term	Database	Id	Sample number	Background number	P-Value	Corrected P-Value	Genes	Hyperlink	typeII	typeI
Pentose and glucuronate interconversions	KEGG PATHWAY	ko00040	10	35	2.26221e-05	0.00132946	g5791|g2097|g8282|g3210|g4563|g547|g801|g7711|g5006|g6447	http://www.genome.jp/kegg-bin/show_pathway?ko00040/K00065%09red/K00002%09red/K01195%09red/K00008%09red/K00128%09red/K18103%09red/K05351%09red/K17818%09red/K18102%09red	Carbohydrate metabolism	Metabolism
Starch and sucrose metabolism	KEGG PATHWAY	ko00500	12	53	2.55665e-05	0.00132946	g3029|g8053|g1557|g5859|g6982|g6475|g5006|g19|g7634|g5801|g7969|g1007	http://www.genome.jp/kegg-bin/show_pathway?ko00500/K01193%09red/K01187%09red/K15920%09red/K01195%09red/K01178%09red/K05349%09red/K00697%09red	Carbohydrate metabolism	Metabolism
Tryptophan metabolism	KEGG PATHWAY	ko00380	9	41	0.00032536	0.0112791	g3065|g801|g5786|g3050|g2555|g8222|g242|g1338|g5372	http://www.genome.jp/kegg-bin/show_pathway?ko00380/K03781%09red/K00128%09red/K00838%09red/K00463%09red	Amino acid metabolism	Metabolism
Toluene degradation	KEGG PATHWAY	ko00623	4	8	0.0014867	0.0309234	g6886|g7090|g6867|g4575	http://www.genome.jp/kegg-bin/show_pathway?ko00623/K03381%09red/K03380%09red	Xenobiotics biodegradation and metabolism	Metabolism
Degradation of aromatic compounds	KEGG PATHWAY	ko01220	6	26	0.00263901	0.0457428	g7090|g6412|g6886|g7711|g3965|g140	http://www.genome.jp/kegg-bin/show_pathway?ko01220/K13953%09red/K00480%09red/K03381%09red/K00002%09red	Global and overview maps	Metabolism
FoxO signaling pathway	KEGG PATHWAY	ko04068	6	27	0.00310613	0.0461483	g5786|g3050|g8222|g242|g1664|g5372	http://www.genome.jp/kegg-bin/show_pathway?ko04068/K03781%09red/K04564%09red	Signal transduction	Environmental Information Processing
Galactose metabolism	KEGG PATHWAY	ko00052	6	28	0.00363232	0.0472202	g3029|g8053|g3090|g6475|g1557|g1007	http://www.genome.jp/kegg-bin/show_pathway?ko00052/K01193%09red/K01684%09red/K01187%09red	Carbohydrate metabolism	Metabolism
Chlorocyclohexane and chlorobenzene degradation	KEGG PATHWAY	ko00361	4	12	0.00474054	0.0547796	g6886|g7090|g6867|g4575	http://www.genome.jp/kegg-bin/show_pathway?ko00361/K03381%09red/K03380%09red	Xenobiotics biodegradation and metabolism	Metabolism
beta-Alanine metabolism	KEGG PATHWAY	ko00410	5	22	0.00633526	0.0658868	g801|g7298|g6036|g5044|g4540	http://www.genome.jp/kegg-bin/show_pathway?ko00410/K13524%09red/K00128%09red/K00276%09red/K01580%09red	Metabolism of other amino acids	Metabolism
Isoquinoline alkaloid biosynthesis	KEGG PATHWAY	ko00950	4	15	0.00907824	0.0858306	g8082|g7298|g6036|g2555	http://www.genome.jp/kegg-bin/show_pathway?ko00950/K00276%09red/K00838%09red/K00505%09red	Biosynthesis of other secondary metabolites	Metabolism
Propanoate metabolism	KEGG PATHWAY	ko00640	5	25	0.0100206	0.0868451	g1527|g2605|g917|g5044|g1514	http://www.genome.jp/kegg-bin/show_pathway?ko00640/K13524%09red/K01900%09red/K18369%09red/K01895%09red/K03417%09red	Carbohydrate metabolism	Metabolism
Cyanoamino acid metabolism	KEGG PATHWAY	ko00460	4	18	0.0154142	0.123314	g131|g2343|g19|g6982	http://www.genome.jp/kegg-bin/show_pathway?ko00460/K05349%09red/K10675%09red/K01455%09red	Metabolism of other amino acids	Metabolism
Benzoate degradation	KEGG PATHWAY	ko00362	3	10	0.0183897	0.136131	g6886|g7090|g3277	http://www.genome.jp/kegg-bin/show_pathway?ko00362/K03381%09red/K14333%09red	Xenobiotics biodegradation and metabolism	Metabolism
Glyoxylate and dicarboxylate metabolism	KEGG PATHWAY	ko00630	6	42	0.0196342	0.136131	g5786|g131|g3050|g8222|g242|g5372	http://www.genome.jp/kegg-bin/show_pathway?ko00630/K03781%09red/K01455%09red	Carbohydrate metabolism	Metabolism
Pyruvate metabolism	KEGG PATHWAY	ko00620	5	32	0.0237636	0.154463	g3753|g801|g2605|g7956|g2101	http://www.genome.jp/kegg-bin/show_pathway?ko00620/K00128%09red/K01895%09red/K01067%09red/K00101%09red	Carbohydrate metabolism	Metabolism
Tropane, piperidine and pyridine alkaloid biosynthesis	KEGG PATHWAY	ko00960	3	13	0.0326056	0.19947	g7298|g6036|g2555	http://www.genome.jp/kegg-bin/show_pathway?ko00960/K00276%09red/K00838%09red	Biosynthesis of other secondary metabolites	Metabolism
Peroxisome	KEGG PATHWAY	ko04146	7	65	0.0419962	0.229874	g5786|g3050|g8222|g242|g6026|g1664|g5372	http://www.genome.jp/kegg-bin/show_pathway?ko04146/K03781%09red/K04564%09red/K07513%09red	Transport and catabolism	Cellular Processes
Carbon metabolism	KEGG PATHWAY	ko01200	11	128	0.047701	0.248045	g2767|g5786|g131|g917|g3050|g8222|g242|g285|g6729|g2605|g5372	http://www.genome.jp/kegg-bin/show_pathway?ko01200/K03781%09red/K00297%09red/K00033%09red/K01900%09red/K01455%09red/K17066%09red/K01895%09red	Global and overview maps	Metabolism
Arginine and proline metabolism	KEGG PATHWAY	ko00330	5	41	0.0540617	0.265859	g210|g800|g1401|g5227|g801	http://www.genome.jp/kegg-bin/show_pathway?ko00330/K00128%09red/K01480%09red/K00286%09red/K01581%09red	Amino acid metabolism	Metabolism
Tyrosine metabolism	KEGG PATHWAY	ko00350	5	42	0.0583749	0.265859	g8082|g7298|g6036|g3965|g2555	http://www.genome.jp/kegg-bin/show_pathway?ko00350/K00276%09red/K13953%09red/K00838%09red/K00505%09red	Amino acid metabolism	Metabolism
Glutathione metabolism	KEGG PATHWAY	ko00480	4	29	0.0587958	0.265859	g210|g6729|g1378|g1401	http://www.genome.jp/kegg-bin/show_pathway?ko00480/K01581%09red/K00033%09red/K01469%09red	Metabolism of other amino acids	Metabolism
Naphthalene degradation	KEGG PATHWAY	ko00626	3	18	0.0657416	0.28488	g140|g6412|g3965	http://www.genome.jp/kegg-bin/show_pathway?ko00626/K13953%09red/K00480%09red	Xenobiotics biodegradation and metabolism	Metabolism
Geraniol degradation	KEGG PATHWAY	ko00281	2	8	0.0714289	0.285716	g4853|g7349	http://www.genome.jp/kegg-bin/show_pathway?ko00281/K00257%09red	Metabolism of terpenoids and polyketides	Metabolism
Ascorbate and aldarate metabolism	KEGG PATHWAY	ko00053	2	8	0.0714289	0.285716	g801|g583	http://www.genome.jp/kegg-bin/show_pathway?ko00053/K00128%09red/K00469%09red	Carbohydrate metabolism	Metabolism
Inositol phosphate metabolism	KEGG PATHWAY	ko00562	3	21	0.0907768	0.349659	g814|g582|g583	http://www.genome.jp/kegg-bin/show_pathway?ko00562/K00010%09red/K00469%09red/K01114%09red	Carbohydrate metabolism	Metabolism
Phenylpropanoid biosynthesis	KEGG PATHWAY	ko00940	2	10	0.0988137	0.357453	g19|g6982	http://www.genome.jp/kegg-bin/show_pathway?ko00940/K05349%09red	Biosynthesis of other secondary metabolites	Metabolism
Glycine, serine and threonine metabolism	KEGG PATHWAY	ko00260	5	50	0.0996744	0.357453	g7137|g7298|g6036|g1898|g6640	http://www.genome.jp/kegg-bin/show_pathway?ko00260/K01620%09red/K00276%09red/K00108%09red	Amino acid metabolism	Metabolism
Valine, leucine and isoleucine degradation	KEGG PATHWAY	ko00280	4	36	0.103337	0.358235	g6026|g801|g5044|g609	http://www.genome.jp/kegg-bin/show_pathway?ko00280/K13524%09red/K00128%09red/K07513%09red/K00020%09red	Amino acid metabolism	Metabolism
Glycolysis / Gluconeogenesis	KEGG PATHWAY	ko00010	5	52	0.111814	0.368668	g801|g7711|g2605|g3965|g3972	http://www.genome.jp/kegg-bin/show_pathway?ko00010/K00128%09red/K13953%09red/K01895%09red/K01568%09red/K00002%09red	Carbohydrate metabolism	Metabolism
Dioxin degradation	KEGG PATHWAY	ko00621	2	11	0.113436	0.368668	g140|g6412	http://www.genome.jp/kegg-bin/show_pathway?ko00621/K00480%09red	Xenobiotics biodegradation and metabolism	Metabolism
Fructose and mannose metabolism	KEGG PATHWAY	ko00051	5	53	0.11814	0.37232	g5791|g7328|g222|g949|g1736	http://www.genome.jp/kegg-bin/show_pathway?ko00051/K17742%09red/K18337%09red/K00100%09red/K00009%09red/K00008%09red	Carbohydrate metabolism	Metabolism
Lysosome	KEGG PATHWAY	ko04142	3	26	0.139613	0.427051	g75|g5006|g4983	http://www.genome.jp/kegg-bin/show_pathway?ko04142/K13289%09red/K01279%09red/K01195%09red	Transport and catabolism	Cellular Processes
Carbon fixation pathways in prokaryotes	KEGG PATHWAY	ko00720	2	14	0.160069	0.458389	g2605|g285	http://www.genome.jp/kegg-bin/show_pathway?ko00720/K00297%09red/K01895%09red	Energy metabolism	Metabolism
Fatty acid degradation	KEGG PATHWAY	ko00071	3	28	0.161183	0.458389	g6026|g801|g3965	http://www.genome.jp/kegg-bin/show_pathway?ko00071/K00128%09red/K13953%09red/K07513%09red	Lipid metabolism	Metabolism
Glycerophospholipid metabolism	KEGG PATHWAY	ko00564	4	44	0.168012	0.458389	g6258|g5858|g3410|g814	http://www.genome.jp/kegg-bin/show_pathway?ko00564/K00006%09red/K01114%09red/K01613%09red	Lipid metabolism	Metabolism
Phenylalanine metabolism	KEGG PATHWAY	ko00360	3	29	0.172324	0.458389	g7298|g6036|g2555	http://www.genome.jp/kegg-bin/show_pathway?ko00360/K00276%09red/K00838%09red	Amino acid metabolism	Metabolism
Glycerolipid metabolism	KEGG PATHWAY	ko00561	3	29	0.172324	0.458389	g801|g7711|g5115	http://www.genome.jp/kegg-bin/show_pathway?ko00561/K00128%09red/K01046%09red/K00002%09red	Lipid metabolism	Metabolism
GABAergic synapse	KEGG PATHWAY	ko04727	2	15	0.176303	0.458389	g5044|g4540	http://www.genome.jp/kegg-bin/show_pathway?ko04727/K13524%09red/K01580%09red	Nervous system	Organismal Systems
PPAR signaling pathway	KEGG PATHWAY	ko03320	2	16	0.19278	0.463454	g6026|g7618	http://www.genome.jp/kegg-bin/show_pathway?ko03320/K07513%09red/K00507%09red	Endocrine system	Organismal Systems
Sphingolipid metabolism	KEGG PATHWAY	ko00600	2	16	0.19278	0.463454	g7834|g1274	http://www.genome.jp/kegg-bin/show_pathway?ko00600/K04711%09red/K01130%09red	Lipid metabolism	Metabolism
Chloroalkane and chloroalkene degradation	KEGG PATHWAY	ko00625	3	31	0.195222	0.463454	g801|g3965|g1736	http://www.genome.jp/kegg-bin/show_pathway?ko00625/K00128%09red/K13953%09red/K00100%09red	Xenobiotics biodegradation and metabolism	Metabolism
Aminobenzoate degradation	KEGG PATHWAY	ko00627	3	32	0.20694	0.463454	g4575|g6867|g3277	http://www.genome.jp/kegg-bin/show_pathway?ko00627/K03380%09red/K14333%09red	Xenobiotics biodegradation and metabolism	Metabolism
Nitrogen metabolism	KEGG PATHWAY	ko00910	2	17	0.209445	0.463454	g131|g616	http://www.genome.jp/kegg-bin/show_pathway?ko00910/K01455%09red/K10534%09red	Energy metabolism	Metabolism
Polycyclic aromatic hydrocarbon degradation	KEGG PATHWAY	ko00624	2	17	0.209445	0.463454	g140|g6412	http://www.genome.jp/kegg-bin/show_pathway?ko00624/K00480%09red	Xenobiotics biodegradation and metabolism	Metabolism
Biosynthesis of unsaturated fatty acids	KEGG PATHWAY	ko01040	2	17	0.209445	0.463454	g6026|g7618	http://www.genome.jp/kegg-bin/show_pathway?ko01040/K07513%09red/K00507%09red	Lipid metabolism	Metabolism
Steroid hormone biosynthesis	KEGG PATHWAY	ko00140	1	5	0.241311	0.516061	g7834	http://www.genome.jp/kegg-bin/show_pathway?ko00140/K01130%09red	Lipid metabolism	Metabolism
Porphyrin and chlorophyll metabolism	KEGG PATHWAY	ko00860	2	19	0.243144	0.516061	g7983|g5006	http://www.genome.jp/kegg-bin/show_pathway?ko00860/K13624%09red/K01195%09red	Metabolism of cofactors and vitamins	Metabolism
C5-Branched dibasic acid metabolism	KEGG PATHWAY	ko00660	1	6	0.27546	0.543639	g4545	http://www.genome.jp/kegg-bin/show_pathway?ko00660/K00052%09red	Carbohydrate metabolism	Metabolism
p53 signaling pathway	KEGG PATHWAY	ko04115	1	6	0.27546	0.543639	g399	http://www.genome.jp/kegg-bin/show_pathway?ko04115/K08738%09red	Cell growth and death	Cellular Processes
Caprolactam degradation	KEGG PATHWAY	ko00930	1	6	0.27546	0.543639	g7711	http://www.genome.jp/kegg-bin/show_pathway?ko00930/K00002%09red	Xenobiotics biodegradation and metabolism	Metabolism
Linoleic acid metabolism	KEGG PATHWAY	ko00591	2	21	0.277047	0.543639	g4990|g1736	http://www.genome.jp/kegg-bin/show_pathway?ko00591/K00100%09red/K17862%09red	Lipid metabolism	Metabolism
Metabolism of xenobiotics by cytochrome P450	KEGG PATHWAY	ko00980	2	22	0.293981	0.562104	g6861|g3965	http://www.genome.jp/kegg-bin/show_pathway?ko00980/K15303%09red/K13953%09red	Xenobiotics biodegradation and metabolism	Metabolism
Butanoate metabolism	KEGG PATHWAY	ko00650	3	40	0.304761	0.562104	g1736|g5044|g4540	http://www.genome.jp/kegg-bin/show_pathway?ko00650/K13524%09red/K01580%09red/K00100%09red	Carbohydrate metabolism	Metabolism
alpha-Linolenic acid metabolism	KEGG PATHWAY	ko00592	1	7	0.308076	0.562104	g6026	http://www.genome.jp/kegg-bin/show_pathway?ko00592/K07513%09red	Lipid metabolism	Metabolism
Apoptosis	KEGG PATHWAY	ko04210	1	8	0.33923	0.568424	g399	http://www.genome.jp/kegg-bin/show_pathway?ko04210/K08738%09red	Cell growth and death	Cellular Processes
Taurine and hypotaurine metabolism	KEGG PATHWAY	ko00430	1	8	0.33923	0.568424	g4540	http://www.genome.jp/kegg-bin/show_pathway?ko00430/K01580%09red	Metabolism of other amino acids	Metabolism
Retinol metabolism	KEGG PATHWAY	ko00830	1	8	0.33923	0.568424	g3965	http://www.genome.jp/kegg-bin/show_pathway?ko00830/K13953%09red	Metabolism of cofactors and vitamins	Metabolism
Melanogenesis	KEGG PATHWAY	ko04916	1	8	0.33923	0.568424	g8082	http://www.genome.jp/kegg-bin/show_pathway?ko04916/K00505%09red	Endocrine system	Organismal Systems
Steroid biosynthesis	KEGG PATHWAY	ko00100	2	25	0.344334	0.568424	g4611|g29	http://www.genome.jp/kegg-bin/show_pathway?ko00100/K00227%09red/K00559%09red	Lipid metabolism	Metabolism
Methane metabolism	KEGG PATHWAY	ko00680	2	26	0.360881	0.586431	g2767|g2605	http://www.genome.jp/kegg-bin/show_pathway?ko00680/K01895%09red/K17066%09red	Energy metabolism	Metabolism
Riboflavin metabolism	KEGG PATHWAY	ko00740	1	9	0.368986	0.590377	g8082	http://www.genome.jp/kegg-bin/show_pathway?ko00740/K00505%09red	Metabolism of cofactors and vitamins	Metabolism
Ubiquinone and other terpenoid-quinone biosynthesis	KEGG PATHWAY	ko00130	1	10	0.397406	0.598989	g2555	http://www.genome.jp/kegg-bin/show_pathway?ko00130/K00838%09red	Metabolism of cofactors and vitamins	Metabolism
Lysine biosynthesis	KEGG PATHWAY	ko00300	1	10	0.397406	0.598989	g2555	http://www.genome.jp/kegg-bin/show_pathway?ko00300/K00838%09red	Amino acid metabolism	Metabolism
Drug metabolism - other enzymes	KEGG PATHWAY	ko00983	1	10	0.397406	0.598989	g5006	http://www.genome.jp/kegg-bin/show_pathway?ko00983/K01195%09red	Xenobiotics biodegradation and metabolism	Metabolism
Limonene and pinene degradation	KEGG PATHWAY	ko00903	1	11	0.424551	0.630761	g801	http://www.genome.jp/kegg-bin/show_pathway?ko00903/K00128%09red	Metabolism of terpenoids and polyketides	Metabolism
Fatty acid metabolism	KEGG PATHWAY	ko01212	2	31	0.440908	0.645837	g6026|g7618	http://www.genome.jp/kegg-bin/show_pathway?ko01212/K07513%09red/K00507%09red	Global and overview maps	Metabolism
Ether lipid metabolism	KEGG PATHWAY	ko00565	1	13	0.475239	0.67644	g814	http://www.genome.jp/kegg-bin/show_pathway?ko00565/K01114%09red	Lipid metabolism	Metabolism
Amino sugar and nucleotide sugar metabolism	KEGG PATHWAY	ko00520	3	55	0.48777	0.67644	g3842|g3839|g5859	http://www.genome.jp/kegg-bin/show_pathway?ko00520/K01443%09red/K15920%09red/K02564%09red	Carbohydrate metabolism	Metabolism
Histidine metabolism	KEGG PATHWAY	ko00340	1	14	0.498889	0.67644	g801	http://www.genome.jp/kegg-bin/show_pathway?ko00340/K00128%09red	Amino acid metabolism	Metabolism
One carbon pool by folate	KEGG PATHWAY	ko00670	1	14	0.498889	0.67644	g285	http://www.genome.jp/kegg-bin/show_pathway?ko00670/K00297%09red	Metabolism of cofactors and vitamins	Metabolism
Alanine, aspartate and glutamate metabolism	KEGG PATHWAY	ko00250	2	35	0.500825	0.67644	g5044|g4540	http://www.genome.jp/kegg-bin/show_pathway?ko00250/K13524%09red/K01580%09red	Amino acid metabolism	Metabolism
Meiosis - yeast	KEGG PATHWAY	ko04113	3	58	0.521836	0.695781	g500|g6348|g1359	http://www.genome.jp/kegg-bin/show_pathway?ko04113/K10872%09red/K08139%09red	Cell growth and death	Cellular Processes
Streptomycin biosynthesis	KEGG PATHWAY	ko00521	1	16	0.543051	0.714902	g582	http://www.genome.jp/kegg-bin/show_pathway?ko00521/K00010%09red	Biosynthesis of other secondary metabolites	Metabolism
Thyroid hormone signaling pathway	KEGG PATHWAY	ko04919	1	17	0.563655	0.723705	g814	http://www.genome.jp/kegg-bin/show_pathway?ko04919/K01114%09red	Endocrine system	Organismal Systems
Sulfur metabolism	KEGG PATHWAY	ko00920	1	17	0.563655	0.723705	g399	http://www.genome.jp/kegg-bin/show_pathway?ko00920/K08738%09red	Energy metabolism	Metabolism
SNARE interactions in vesicular transport	KEGG PATHWAY	ko04130	1	18	0.583333	0.730924	g5618	http://www.genome.jp/kegg-bin/show_pathway?ko04130/K08490%09red	Folding, sorting and degradation	Genetic Information Processing
Drug metabolism - cytochrome P450	KEGG PATHWAY	ko00982	1	18	0.583333	0.730924	g3965	http://www.genome.jp/kegg-bin/show_pathway?ko00982/K13953%09red	Xenobiotics biodegradation and metabolism	Metabolism
Two-component system	KEGG PATHWAY	ko02020	1	19	0.602127	0.734759	g399	http://www.genome.jp/kegg-bin/show_pathway?ko02020/K08738%09red	Signal transduction	Environmental Information Processing
Valine, leucine and isoleucine biosynthesis	KEGG PATHWAY	ko00290	1	19	0.602127	0.734759	g4545	http://www.genome.jp/kegg-bin/show_pathway?ko00290/K00052%09red	Amino acid metabolism	Metabolism
2-Oxocarboxylic acid metabolism	KEGG PATHWAY	ko01210	2	43	0.607589	0.734759	g4545|g2555	http://www.genome.jp/kegg-bin/show_pathway?ko01210/K00838%09red/K00052%09red	Global and overview maps	Metabolism
Phenylalanine, tyrosine and tryptophan biosynthesis	KEGG PATHWAY	ko00400	1	22	0.65359	0.773327	g2555	http://www.genome.jp/kegg-bin/show_pathway?ko00400/K00838%09red	Amino acid metabolism	Metabolism
AMPK signaling pathway	KEGG PATHWAY	ko04152	1	23	0.669225	0.773327	g7618	http://www.genome.jp/kegg-bin/show_pathway?ko04152/K00507%09red	Signal transduction	Environmental Information Processing
Bisphenol degradation	KEGG PATHWAY	ko00363	1	23	0.669225	0.773327	g1736	http://www.genome.jp/kegg-bin/show_pathway?ko00363/K00100%09red	Xenobiotics biodegradation and metabolism	Metabolism
Insulin signaling pathway	KEGG PATHWAY	ko04910	1	27	0.725042	0.79373	g2368	http://www.genome.jp/kegg-bin/show_pathway?ko04910/K07192%09red	Endocrine system	Organismal Systems
Pentose phosphate pathway	KEGG PATHWAY	ko00030	1	27	0.725042	0.79373	g6729	http://www.genome.jp/kegg-bin/show_pathway?ko00030/K00033%09red	Carbohydrate metabolism	Metabolism
Lysine degradation	KEGG PATHWAY	ko00310	1	28	0.737462	0.798917	g801	http://www.genome.jp/kegg-bin/show_pathway?ko00310/K00128%09red	Amino acid metabolism	Metabolism
MAPK signaling pathway - yeast	KEGG PATHWAY	ko04011	1	29	0.749323	0.803398	g7249	http://www.genome.jp/kegg-bin/show_pathway?ko04011/K11213%09red	Signal transduction	Environmental Information Processing
Citrate cycle (TCA cycle)	KEGG PATHWAY	ko00020	1	33	0.791662	0.840131	g917	http://www.genome.jp/kegg-bin/show_pathway?ko00020/K01900%09red	Carbohydrate metabolism	Metabolism
Biosynthesis of amino acids	KEGG PATHWAY	ko01230	4	125	0.839267	0.881654	g7137|g800|g4545|g2555	http://www.genome.jp/kegg-bin/show_pathway?ko01230/K01620%09red/K00286%09red/K00838%09red/K00052%09red	Global and overview maps	Metabolism
Cysteine and methionine metabolism	KEGG PATHWAY	ko00270	1	45	0.88049	0.906643	g2555	http://www.genome.jp/kegg-bin/show_pathway?ko00270/K00838%09red	Amino acid metabolism	Metabolism

## Sheet: Sample84H_1M_vs_Sample84H_4M.DE
#Term	Database	Id	Sample number	Background number	P-Value	Corrected P-Value	Genes	Hyperlink	typeII	typeI
Tyrosine metabolism	KEGG PATHWAY	ko00350	22	42	2.71877e-05	0.00568224	g5063|g8243|g2555|g247|g4234|g4236|g4233|g4232|g2023|g2027|g6056|g8176|g7277|g7218|g6036|g8082|g7298|g5390|g8184|g4838|g2636|g3965	http://www.genome.jp/kegg-bin/show_pathway?ko00350/K00276%09red/K14454%09red/K00451%09red/K01800%09red/K01555%09red/K02510%09red/K00129%09red/K00545%09red/K00457%09red/K13953%09red/K00838%09red/K00505%09red	Amino acid metabolism	Metabolism
beta-Alanine metabolism	KEGG PATHWAY	ko00410	14	22	0.000178564	0.0186599	g5386|g4364|g2106|g662|g8176|g2636|g801|g7298|g7277|g6604|g4540|g6036|g5044|g6371	http://www.genome.jp/kegg-bin/show_pathway?ko00410/K13524%09red/K00249%09red/K00276%09red/K00140%09red/K00128%09red/K00129%09red/K01580%09red/K13366%09red/K01918%09red	Metabolism of other amino acids	Metabolism
Tryptophan metabolism	KEGG PATHWAY	ko00380	19	41	0.000323668	0.0199894	g7182|g5386|g3207|g2682|g5335|g3065|g401|g7246|g3050|g5336|g8222|g2555|g801|g242|g1338|g5786|g15|g1905|g8304	http://www.genome.jp/kegg-bin/show_pathway?ko00380/K03781%09red/K01501%09red/K00128%09red/K01556%09red/K00463%09red/K01426%09red/K00838%09red/K00493%09red	Amino acid metabolism	Metabolism
Starch and sucrose metabolism	KEGG PATHWAY	ko00500	22	53	0.000382572	0.0199894	g5678|g1867|g5006|g1443|g3883|g1444|g8053|g6316|g7121|g6682|g5801|g3112|g3071|g6982|g1445|g1653|g1557|g5859|g19|g1001|g1007|g6021	http://www.genome.jp/kegg-bin/show_pathway?ko00500/K01193%09red/K01176%09red/K01187%09red/K01195%09red/K01178%09red/K16055%09red/K00844%09red/K15920%09red/K01210%09red/K05349%09red/K00697%09red/K00012%09red	Carbohydrate metabolism	Metabolism
Cyanoamino acid metabolism	KEGG PATHWAY	ko00460	11	18	0.00112538	0.0470408	g3883|g4686|g3071|g131|g1867|g3339|g3622|g6982|g19|g2682|g580	http://www.genome.jp/kegg-bin/show_pathway?ko00460/K01501%09red/K00600%09red/K00681%09red/K05349%09red/K01455%09red/K01424%09red	Metabolism of other amino acids	Metabolism
Degradation of aromatic compounds	KEGG PATHWAY	ko01220	13	26	0.00165346	0.0575955	g7090|g6298|g6056|g6886|g247|g6593|g86|g3965|g3276|g8243|g5805|g4218|g140	http://www.genome.jp/kegg-bin/show_pathway?ko01220/K13953%09red/K00480%09red/K03381%09red/K00002%09red	Global and overview maps	Metabolism
Valine, leucine and isoleucine degradation	KEGG PATHWAY	ko00280	15	36	0.00305744	0.0670393	g5386|g4364|g6130|g6604|g6132|g6726|g454|g4698|g801|g6129|g609|g6026|g4438|g5044|g819	http://www.genome.jp/kegg-bin/show_pathway?ko00280/K13524%09red/K01027%09red/K00140%09red/K00249%09red/K00166%09red/K00167%09red/K00128%09red/K00253%09red/K01640%09red/K07513%09red/K09699%09red/K00020%09red/K01969%09red/K01968%09red	Amino acid metabolism	Metabolism
Carbon metabolism	KEGG PATHWAY	ko01200	36	128	0.00307518	0.0670393	g4256|g131|g917|g8222|g242|g6604|g610|g7182|g5786|g1469|g7951|g7490|g7218|g2605|g8304|g2374|g4680|g866|g2767|g4364|g3050|g2264|g251|g252|g6729|g2110|g3721|g401|g3622|g4879|g815|g285|g1416|g15|g5422|g6021	http://www.genome.jp/kegg-bin/show_pathway?ko01200/K01681%09red/K00600%09red/K01624%09red/K00831%09red/K01647%09red/K03781%09red/K14454%09red/K00281%09red/K00249%09red/K01895%09red/K00033%09red/K00844%09red/K17989%09red/K17100%09red/K03396%09red/K01900%09red/K00948%09red/K01610%09red/K01638%09red/K01637%09red/K01455%09red/K01738%09red/K01808%09red/K00140%09red/K00297%09red/K01803%09red/K00029%09r…	Global and overview maps	Metabolism
Naphthalene degradation	KEGG PATHWAY	ko00626	10	18	0.00316846	0.0670393	g6298|g6056|g247|g6593|g3965|g3276|g8243|g5805|g4218|g140	http://www.genome.jp/kegg-bin/show_pathway?ko00626/K13953%09red/K00480%09red	Xenobiotics biodegradation and metabolism	Metabolism
Propanoate metabolism	KEGG PATHWAY	ko00640	12	25	0.00320762	0.0670393	g2549|g2605|g4364|g6726|g917|g4438|g6604|g4643|g1527|g819|g5044|g1514	http://www.genome.jp/kegg-bin/show_pathway?ko00640/K13524%09red/K00140%09red/K00166%09red/K00167%09red/K00249%09red/K01900%09red/K01720%09red/K03417%09red/K18369%09red/K09699%09red/K01895%09red	Carbohydrate metabolism	Metabolism
Glyoxylate and dicarboxylate metabolism	KEGG PATHWAY	ko00630	16	42	0.00457368	0.0868998	g4680|g7182|g2110|g3721|g5786|g1469|g866|g131|g401|g3050|g3622|g8222|g242|g7490|g15|g8304	http://www.genome.jp/kegg-bin/show_pathway?ko00630/K03781%09red/K00281%09red/K01681%09red/K00600%09red/K01638%09red/K01637%09red/K01455%09red/K01647%09red	Carbohydrate metabolism	Metabolism
Chloroalkane and chloroalkene degradation	KEGG PATHWAY	ko00625	13	31	0.00542792	0.0898263	g1980|g4933|g8057|g2760|g2745|g6056|g801|g247|g2804|g3965|g8243|g5386|g1736	http://www.genome.jp/kegg-bin/show_pathway?ko00625/K00128%09red/K13953%09red/K01560%09red/K00100%09red	Xenobiotics biodegradation and metabolism	Metabolism
Arginine and proline metabolism	KEGG PATHWAY	ko00330	15	41	0.0079715	0.112922	g4547|g2106|g5395|g6731|g1812|g800|g4027|g5227|g801|g210|g7218|g6458|g1905|g5386|g1813	http://www.genome.jp/kegg-bin/show_pathway?ko00330/K14454%09red/K01426%09red/K00294%09red/K00286%09red/K00472%09red/K00128%09red/K00613%09red/K10536%09red/K00819%09red/K13366%09red/K01581%09red/K01480%09red	Amino acid metabolism	Metabolism
Ribosome biogenesis in eukaryotes	KEGG PATHWAY	ko03008	21	67	0.00810446	0.112922	g4524|g7519|g1454|g483|g172|g3174|g1791|g1476|g6603|g361|g3343|g4082|g1211|g5263|g3604|g4850|g5203|g4856|g6219|g3287|g5046	http://www.genome.jp/kegg-bin/show_pathway?ko03008/K14572%09red/K14573%09red/K14570%09red/K14548%09red/K14549%09red/K14567%09red/K14566%09red/K14569%09red/K14555%09red/K14556%09red/K14550%09red/K14546%09red/K14553%09red/K11129%09red/K14539%09red/K14537%09red/K14544%09red/K14521%09red/K07178%09red/K14564%09red	Translation	Genetic Information Processing
Glycolysis / Gluconeogenesis	KEGG PATHWAY	ko00010	17	52	0.0118383	0.139172	g5386|g2605|g247|g6353|g6056|g3030|g4891|g801|g86|g3965|g4256|g8243|g6021|g610|g2636|g3972|g251	http://www.genome.jp/kegg-bin/show_pathway?ko00010/K00002%09red/K00844%09red/K01803%09red/K00128%09red/K00129%09red/K01785%09red/K01568%09red/K01624%09red/K01610%09red/K13953%09red/K01895%09red	Carbohydrate metabolism	Metabolism
Pentose and glucuronate interconversions	KEGG PATHWAY	ko00040	13	35	0.0118727	0.139172	g5791|g6453|g8282|g4563|g2097|g6316|g547|g801|g86|g5006|g8035|g6447|g5386	http://www.genome.jp/kegg-bin/show_pathway?ko00040/K00065%09red/K00002%09red/K01195%09red/K00008%09red/K00128%09red/K18106%09red/K18103%09red/K18102%09red/K00012%09red/K01728%09red/K05351%09red	Carbohydrate metabolism	Metabolism
FoxO signaling pathway	KEGG PATHWAY	ko04068	11	27	0.0119861	0.139172	g7182|g5786|g401|g2903|g3050|g8222|g242|g3|g15|g6873|g8304	http://www.genome.jp/kegg-bin/show_pathway?ko04068/K03781%09red/K08341%09red/K04441%09red/K03099%09red	Signal transduction	Environmental Information Processing
Fructose and mannose metabolism	KEGG PATHWAY	ko00051	17	53	0.0136711	0.150382	g1980|g4933|g8057|g222|g3443|g2745|g6055|g6054|g949|g2804|g251|g252|g1736|g7328|g610|g5791|g6021	http://www.genome.jp/kegg-bin/show_pathway?ko00051/K01808%09red/K17742%09red/K18337%09red/K12661%09red/K00844%09red/K01803%09red/K00009%09red/K00008%09red/K01624%09red/K00100%09red	Carbohydrate metabolism	Metabolism
Phenylpropanoid biosynthesis	KEGG PATHWAY	ko00940	6	10	0.0165387	0.161238	g3883|g3071|g1867|g6982|g5116|g19	http://www.genome.jp/kegg-bin/show_pathway?ko00940/K05349%09red/K12468%09red	Biosynthesis of other secondary metabolites	Metabolism
Inositol phosphate metabolism	KEGG PATHWAY	ko00562	9	21	0.0175283	0.161238	g4536|g2020|g4364|g1585|g814|g251|g5817|g582|g583	http://www.genome.jp/kegg-bin/show_pathway?ko00562/K00140%09red/K00999%09red/K01092%09red/K01803%09red/K01114%09red/K00010%09red/K00469%09red	Carbohydrate metabolism	Metabolism
Linoleic acid metabolism	KEGG PATHWAY	ko00591	9	21	0.0175283	0.161238	g1980|g4933|g8057|g2745|g2625|g4990|g5242|g2804|g1736	http://www.genome.jp/kegg-bin/show_pathway?ko00591/K14674%09red/K17863%09red/K00100%09red/K17862%09red	Lipid metabolism	Metabolism
Phenylalanine metabolism	KEGG PATHWAY	ko00360	11	29	0.0177439	0.161238	g2023|g5063|g7277|g8176|g2555|g7298|g4236|g2636|g7218|g6036|g1905	http://www.genome.jp/kegg-bin/show_pathway?ko00360/K00276%09red/K14454%09red/K00129%09red/K00457%09red/K01426%09red/K00838%09red	Amino acid metabolism	Metabolism
Dioxin degradation	KEGG PATHWAY	ko00621	6	11	0.022618	0.196072	g6298|g6593|g3276|g5805|g4218|g140	http://www.genome.jp/kegg-bin/show_pathway?ko00621/K00480%09red	Xenobiotics biodegradation and metabolism	Metabolism
Styrene degradation	KEGG PATHWAY	ko00643	7	15	0.0253032	0.196072	g2682|g4234|g5526|g5390|g4233|g4232|g1905	http://www.genome.jp/kegg-bin/show_pathway?ko00643/K01800%09red/K01501%09red/K00451%09red/K10438%09red/K01555%09red/K01426%09red	Xenobiotics biodegradation and metabolism	Metabolism
Isoquinoline alkaloid biosynthesis	KEGG PATHWAY	ko00950	7	15	0.0253032	0.196072	g8082|g8176|g2555|g7298|g7277|g7218|g6036	http://www.genome.jp/kegg-bin/show_pathway?ko00950/K00276%09red/K14454%09red/K00838%09red/K00505%09red	Biosynthesis of other secondary metabolites	Metabolism
Taurine and hypotaurine metabolism	KEGG PATHWAY	ko00430	5	8	0.0253299	0.196072	g3085|g4540|g580|g4686|g6371	http://www.genome.jp/kegg-bin/show_pathway?ko00430/K00681%09red/K01580%09red/K00456%09red	Metabolism of other amino acids	Metabolism
Steroid biosynthesis	KEGG PATHWAY	ko00100	9	25	0.0386182	0.270305	g3151|g2625|g8044|g5990|g3197|g29|g926|g1097|g2544	http://www.genome.jp/kegg-bin/show_pathway?ko00100/K05917%09red/K01824%09red/K09831%09red/K14674%09red/K07750%09red/K00559%09red/K00222%09red/K09829%09red	Lipid metabolism	Metabolism
Tropane, piperidine and pyridine alkaloid biosynthesis	KEGG PATHWAY	ko00960	6	13	0.0388826	0.270305	g8176|g2555|g7298|g7277|g7218|g6036	http://www.genome.jp/kegg-bin/show_pathway?ko00960/K00276%09red/K14454%09red/K00838%09red	Biosynthesis of other secondary metabolites	Metabolism
Polycyclic aromatic hydrocarbon degradation	KEGG PATHWAY	ko00624	7	17	0.040093	0.270305	g6298|g6593|g8226|g3276|g5805|g4218|g140	http://www.genome.jp/kegg-bin/show_pathway?ko00624/K00480%09red/K00517%09red	Xenobiotics biodegradation and metabolism	Metabolism
Alanine, aspartate and glutamate metabolism	KEGG PATHWAY	ko00250	11	35	0.0471188	0.307745	g1031|g3339|g1098|g6731|g4027|g4540|g7218|g6942|g5044|g2150|g6371	http://www.genome.jp/kegg-bin/show_pathway?ko00250/K13524%09red/K14454%09red/K00294%09red/K00139%09red/K01779%09red/K11541%09red/K00764%09red/K01424%09red/K01580%09red	Amino acid metabolism	Metabolism
Butanoate metabolism	KEGG PATHWAY	ko00650	12	40	0.0500494	0.31698	g1980|g4933|g8057|g2745|g1031|g4698|g454|g2804|g1736|g4540|g5044|g6371	http://www.genome.jp/kegg-bin/show_pathway?ko00650/K13524%09red/K01027%09red/K00139%09red/K01580%09red/K01640%09red/K00100%09red	Carbohydrate metabolism	Metabolism
Galactose metabolism	KEGG PATHWAY	ko00052	9	28	0.0627266	0.374567	g5678|g8053|g1557|g3030|g4891|g916|g3090|g1007|g6021	http://www.genome.jp/kegg-bin/show_pathway?ko00052/K01193%09red/K01187%09red/K00844%09red/K01684%09red/K01785%09red/K07407%09red	Carbohydrate metabolism	Metabolism
Fatty acid degradation	KEGG PATHWAY	ko00071	9	28	0.0627266	0.374567	g5386|g3207|g247|g6056|g801|g3965|g6604|g8243|g6026	http://www.genome.jp/kegg-bin/show_pathway?ko00071/K00128%09red/K00249%09red/K13953%09red/K07513%09red/K00493%09red	Lipid metabolism	Metabolism
Glycerolipid metabolism	KEGG PATHWAY	ko00561	9	29	0.0724975	0.384105	g5386|g241|g2625|g916|g1341|g801|g86|g5115|g7774	http://www.genome.jp/kegg-bin/show_pathway?ko00561/K00002%09red/K17900%09red/K00128%09red/K01046%09red/K14674%09red/K07407%09red	Lipid metabolism	Metabolism
Toluene degradation	KEGG PATHWAY	ko00623	4	8	0.073513	0.384105	g686|g6886|g7090|g4575	http://www.genome.jp/kegg-bin/show_pathway?ko00623/K03381%09red/K03380%09red	Xenobiotics biodegradation and metabolism	Metabolism
Geraniol degradation	KEGG PATHWAY	ko00281	4	8	0.073513	0.384105	g4853|g454|g1694|g7349	http://www.genome.jp/kegg-bin/show_pathway?ko00281/K01640%09red/K00257%09red	Metabolism of terpenoids and polyketides	Metabolism
Ascorbate and aldarate metabolism	KEGG PATHWAY	ko00053	4	8	0.073513	0.384105	g801|g5386|g6316|g583	http://www.genome.jp/kegg-bin/show_pathway?ko00053/K00128%09red/K00012%09red/K00469%09red	Carbohydrate metabolism	Metabolism
Retinol metabolism	KEGG PATHWAY	ko00830	4	8	0.073513	0.384105	g247|g6056|g3965|g8243	http://www.genome.jp/kegg-bin/show_pathway?ko00830/K13953%09red	Metabolism of cofactors and vitamins	Metabolism
Chlorocyclohexane and chlorobenzene degradation	KEGG PATHWAY	ko00361	5	12	0.0760547	0.387693	g686|g6886|g7090|g2760|g4575	http://www.genome.jp/kegg-bin/show_pathway?ko00361/K01560%09red/K03381%09red/K03380%09red	Xenobiotics biodegradation and metabolism	Metabolism
Glycerophospholipid metabolism	KEGG PATHWAY	ko00564	12	44	0.0808639	0.402394	g2625|g5756|g8224|g6258|g1585|g5556|g246|g814|g2652|g4044|g3925|g3410	http://www.genome.jp/kegg-bin/show_pathway?ko00564/K16369%09red/K00006%09red/K13333%09red/K00999%09red/K01114%09red/K01115%09red/K00993%09red/K01613%09red/K13511%09red/K14674%09red/K13621%09red/K00550%09red	Lipid metabolism	Metabolism
Nitrogen metabolism	KEGG PATHWAY	ko00910	6	17	0.0894817	0.429607	g2682|g131|g3955|g616|g1882|g1883	http://www.genome.jp/kegg-bin/show_pathway?ko00910/K00459%09red/K01455%09red/K01501%09red/K10534%09red/K17877%09red	Energy metabolism	Metabolism
Lysosome	KEGG PATHWAY	ko04142	8	26	0.0904435	0.429607	g3934|g75|g4551|g5006|g1306|g7217|g4983|g6635	http://www.genome.jp/kegg-bin/show_pathway?ko04142/K01192%09red/K13289%09red/K01195%09red/K12373%09red/K01074%09red/K01279%09red	Transport and catabolism	Cellular Processes
Pyruvate metabolism	KEGG PATHWAY	ko00620	9	32	0.107146	0.486816	g2101|g5386|g2110|g4256|g7956|g6529|g801|g2605|g2374	http://www.genome.jp/kegg-bin/show_pathway?ko00620/K00128%09red/K00029%09red/K01610%09red/K01638%09red/K01895%09red/K00101%09red	Carbohydrate metabolism	Metabolism
Aminobenzoate degradation	KEGG PATHWAY	ko00627	9	32	0.107146	0.486816	g686|g3207|g746|g3954|g4575|g8226|g3277|g2682|g1905	http://www.genome.jp/kegg-bin/show_pathway?ko00627/K01078%09red/K01501%09red/K03380%09red/K14333%09red/K01426%09red/K00517%09red/K00493%09red	Xenobiotics biodegradation and metabolism	Metabolism
Bisphenol degradation	KEGG PATHWAY	ko00363	7	23	0.113407	0.5043	g1980|g4933|g8057|g2745|g2804|g1736|g8226	http://www.genome.jp/kegg-bin/show_pathway?ko00363/K00517%09red/K00100%09red	Xenobiotics biodegradation and metabolism	Metabolism
Ubiquinone and other terpenoid-quinone biosynthesis	KEGG PATHWAY	ko00130	4	10	0.1189	0.517712	g2023|g4236|g5063|g2555	http://www.genome.jp/kegg-bin/show_pathway?ko00130/K00838%09red/K00457%09red	Metabolism of cofactors and vitamins	Metabolism
Carbon fixation in photosynthetic organisms	KEGG PATHWAY	ko00710	7	24	0.129866	0.553919	g4256|g7725|g251|g252|g7218|g610|g2374	http://www.genome.jp/kegg-bin/show_pathway?ko00710/K01808%09red/K14454%09red/K01803%09red/K01621%09red/K00029%09red/K01610%09red/K01624%09red	Energy metabolism	Metabolism
GABAergic synapse	KEGG PATHWAY	ko04727	5	15	0.134727	0.563159	g2903|g4540|g5044|g7478|g6371	http://www.genome.jp/kegg-bin/show_pathway?ko04727/K05185%09red/K08341%09red/K01580%09red/K13524%09red	Nervous system	Organismal Systems
Glycine, serine and threonine metabolism	KEGG PATHWAY	ko00260	12	50	0.145525	0.592567	g2864|g3721|g8176|g3622|g6640|g1813|g7298|g7277|g1416|g6036|g2264|g3008	http://www.genome.jp/kegg-bin/show_pathway?ko00260/K00276%09red/K00613%09red/K00306%09red/K17989%09red/K00281%09red/K00600%09red/K00108%09red/K00831%09red/K00928%09red	Amino acid metabolism	Metabolism
Cysteine and methionine metabolism	KEGG PATHWAY	ko00270	11	45	0.147433	0.592567	g2864|g1624|g3085|g7683|g2555|g8024|g1416|g5923|g7218|g6493|g5422	http://www.genome.jp/kegg-bin/show_pathway?ko00270/K14454%09red/K01505%09red/K00641%09red/K17989%09red/K01251%09red/K01738%09red/K00456%09red/K00928%09red/K00789%09red/K00838%09red/K00549%09red	Amino acid metabolism	Metabolism
Carbohydrate digestion and absorption	KEGG PATHWAY	ko04973	3	7	0.152454	0.601185	g7121|g6021|g1653	http://www.genome.jp/kegg-bin/show_pathway?ko04973/K01176%09red/K00844%09red	Digestive system	Organismal Systems
Streptomycin biosynthesis	KEGG PATHWAY	ko00521	5	16	0.157736	0.610497	g4536|g5817|g2020|g582|g6021	http://www.genome.jp/kegg-bin/show_pathway?ko00521/K00010%09red/K01092%09red/K00844%09red	Biosynthesis of other secondary metabolites	Metabolism
Methane metabolism	KEGG PATHWAY	ko00680	7	26	0.166071	0.631069	g2767|g7951|g3622|g815|g2264|g2605|g610	http://www.genome.jp/kegg-bin/show_pathway?ko00680/K17100%09red/K03396%09red/K00600%09red/K01624%09red/K00831%09red/K01895%09red/K17066%09red	Energy metabolism	Metabolism
Biosynthesis of unsaturated fatty acids	KEGG PATHWAY	ko01040	5	17	0.182211	0.679822	g6026|g3675|g3500|g1718|g7618	http://www.genome.jp/kegg-bin/show_pathway?ko01040/K07513%09red/K00059%09red/K00507%09red	Lipid metabolism	Metabolism
Metabolism of xenobiotics by cytochrome P450	KEGG PATHWAY	ko00980	6	22	0.185406	0.679822	g6056|g247|g3965|g8243|g6861|g2636	http://www.genome.jp/kegg-bin/show_pathway?ko00980/K15303%09red/K13953%09red/K00129%09red	Xenobiotics biodegradation and metabolism	Metabolism
Biotin metabolism	KEGG PATHWAY	ko00780	3	8	0.189051	0.681234	g3675|g3500|g1718	http://www.genome.jp/kegg-bin/show_pathway?ko00780/K00059%09red	Metabolism of cofactors and vitamins	Metabolism
Peroxisome	KEGG PATHWAY	ko04146	14	65	0.202815	0.708579	g7182|g5786|g401|g3050|g8222|g7771|g454|g242|g1925|g6026|g15|g8304|g5807|g3008	http://www.genome.jp/kegg-bin/show_pathway?ko04146/K03781%09red/K00306%09red/K01796%09red/K00106%09red/K01640%09red/K07513%09red/K00624%09red	Transport and catabolism	Cellular Processes
Ether lipid metabolism	KEGG PATHWAY	ko00565	4	13	0.20342	0.708579	g3925|g814|g5756|g2625	http://www.genome.jp/kegg-bin/show_pathway?ko00565/K14674%09red/K00993%09red/K01114%09red/K01115%09red	Lipid metabolism	Metabolism
Drug metabolism - cytochrome P450	KEGG PATHWAY	ko00982	5	18	0.207969	0.71255	g247|g6056|g2636|g3965|g8243	http://www.genome.jp/kegg-bin/show_pathway?ko00982/K00129%09red/K13953%09red	Xenobiotics biodegradation and metabolism	Metabolism
RNA polymerase	KEGG PATHWAY	ko03020	7	29	0.227488	0.766853	g1760|g1346|g4094|g2562|g1321|g6839|g4318	http://www.genome.jp/kegg-bin/show_pathway?ko03020/K03004%09red/K03005%09red/K03002%09red/K03025%09red/K03000%09red/K03027%09red/K02999%09red	Transcription	Genetic Information Processing
Fatty acid biosynthesis	KEGG PATHWAY	ko00061	3	10	0.267354	0.873077	g3675|g3500|g1718	http://www.genome.jp/kegg-bin/show_pathway?ko00061/K00059%09red	Lipid metabolism	Metabolism
Benzoate degradation	KEGG PATHWAY	ko00362	3	10	0.267354	0.873077	g6886|g7090|g3277	http://www.genome.jp/kegg-bin/show_pathway?ko00362/K03381%09red/K14333%09red	Xenobiotics biodegradation and metabolism	Metabolism
Fatty acid metabolism	KEGG PATHWAY	ko01212	7	31	0.272132	0.875009	g3675|g7217|g6604|g6026|g3500|g1718|g7618	http://www.genome.jp/kegg-bin/show_pathway?ko01212/K00249%09red/K00507%09red/K07513%09red/K01074%09red/K00059%09red	Global and overview maps	Metabolism
Regulation of autophagy	KEGG PATHWAY	ko04140	4	16	0.300226	0.908361	g1225|g2903|g5164|g7479	http://www.genome.jp/kegg-bin/show_pathway?ko04140/K08341%09red/K08342%09red/K08343%09red/K08337%09red	_	_
Pentose phosphate pathway	KEGG PATHWAY	ko00030	6	27	0.30713	0.908361	g6729|g4879|g7725|g1461|g252|g610	http://www.genome.jp/kegg-bin/show_pathway?ko00030/K01808%09red/K01621%09red/K00948%09red/K01624%09red/K01619%09red/K00033%09red	Carbohydrate metabolism	Metabolism
Limonene and pinene degradation	KEGG PATHWAY	ko00903	3	11	0.307841	0.908361	g801|g5386|g8226	http://www.genome.jp/kegg-bin/show_pathway?ko00903/K00128%09red/K00517%09red	Metabolism of terpenoids and polyketides	Metabolism
Thiamine metabolism	KEGG PATHWAY	ko00730	2	6	0.308582	0.908361	g7597|g4324	http://www.genome.jp/kegg-bin/show_pathway?ko00730/K18278%09red/K03146%09red	Metabolism of cofactors and vitamins	Metabolism
Osteoclast differentiation	KEGG PATHWAY	ko04380	2	6	0.308582	0.908361	g3|g4522	http://www.genome.jp/kegg-bin/show_pathway?ko04380/K04441%09red/K08008%09red	Development	Organismal Systems
ABC transporters	KEGG PATHWAY	ko02010	2	6	0.308582	0.908361	g6824|g3401	http://www.genome.jp/kegg-bin/show_pathway?ko02010/K05658%09red	Membrane transport	Environmental Information Processing
Purine metabolism	KEGG PATHWAY	ko00230	17	93	0.36007	0.999989	g1760|g6966|g4951|g4094|g1346|g4879|g2150|g914|g6391|g209|g4799|g2562|g1321|g5807|g6839|g4318|g6852	http://www.genome.jp/kegg-bin/show_pathway?ko00230/K00856%09red/K03000%09red/K03004%09red/K01466%09red/K01477%09red/K03005%09red/K01488%09red/K03025%09red/K00764%09red/K03027%09red/K00106%09red/K03002%09red/K02999%09red/K00365%09red/K00948%09red/K01427%09red/K07127%09red	Nucleotide metabolism	Metabolism
alpha-Linolenic acid metabolism	KEGG PATHWAY	ko00592	2	7	0.362905	0.999989	g6026|g2625	http://www.genome.jp/kegg-bin/show_pathway?ko00592/K14674%09red/K07513%09red	Lipid metabolism	Metabolism
Leukocyte transendothelial migration	KEGG PATHWAY	ko04670	2	8	0.415518	0.999989	g3|g4522	http://www.genome.jp/kegg-bin/show_pathway?ko04670/K04441%09red/K08008%09red	Immune system	Organismal Systems
Mineral absorption	KEGG PATHWAY	ko04978	2	8	0.415518	0.999989	g5539|g5461	http://www.genome.jp/kegg-bin/show_pathway?ko04978/K07213%09red/K14688%09red	Digestive system	Organismal Systems
Prolactin signaling pathway	KEGG PATHWAY	ko04917	2	8	0.415518	0.999989	g6873|g3	http://www.genome.jp/kegg-bin/show_pathway?ko04917/K04441%09red/K03099%09red	Endocrine system	Organismal Systems
Bile secretion	KEGG PATHWAY	ko04976	2	8	0.415518	0.999989	g6824|g3401	http://www.genome.jp/kegg-bin/show_pathway?ko04976/K05658%09red	Digestive system	Organismal Systems
Amino sugar and nucleotide sugar metabolism	KEGG PATHWAY	ko00520	10	55	0.419165	0.999989	g3839|g3934|g3842|g7351|g5859|g6316|g2734|g7773|g161|g6021	http://www.genome.jp/kegg-bin/show_pathway?ko00520/K01183%09red/K15920%09red/K00844%09red/K01836%09red/K12373%09red/K02564%09red/K00698%09red/K01443%09red/K00012%09red	Carbohydrate metabolism	Metabolism
Carbon fixation pathways in prokaryotes	KEGG PATHWAY	ko00720	3	14	0.428653	0.999989	g2605|g285|g1469	http://www.genome.jp/kegg-bin/show_pathway?ko00720/K00297%09red/K01895%09red/K01681%09red	Energy metabolism	Metabolism
Histidine metabolism	KEGG PATHWAY	ko00340	3	14	0.428653	0.999989	g801|g5386|g2636	http://www.genome.jp/kegg-bin/show_pathway?ko00340/K00128%09red/K00129%09red	Amino acid metabolism	Metabolism
Retrograde endocannabinoid signaling	KEGG PATHWAY	ko04723	2	9	0.465844	0.999989	g3|g7478	http://www.genome.jp/kegg-bin/show_pathway?ko04723/K05185%09red/K04441%09red	Nervous system	Organismal Systems
Riboflavin metabolism	KEGG PATHWAY	ko00740	2	9	0.465844	0.999989	g8082|g3049	http://www.genome.jp/kegg-bin/show_pathway?ko00740/K14654%09red/K00505%09red	Metabolism of cofactors and vitamins	Metabolism
Synthesis and degradation of ketone bodies	KEGG PATHWAY	ko00072	2	9	0.465844	0.999989	g454|g4698	http://www.genome.jp/kegg-bin/show_pathway?ko00072/K01027%09red/K01640%09red	Lipid metabolism	Metabolism
Sphingolipid metabolism	KEGG PATHWAY	ko00600	3	16	0.50499	0.999989	g2765|g916|g1990	http://www.genome.jp/kegg-bin/show_pathway?ko00600/K07407%09red/K00654%09red/K12349%09red	Lipid metabolism	Metabolism
GnRH signaling pathway	KEGG PATHWAY	ko04912	3	16	0.50499	0.999989	g6873|g5756|g3	http://www.genome.jp/kegg-bin/show_pathway?ko04912/K04441%09red/K03099%09red/K01115%09red	Endocrine system	Organismal Systems
PPAR signaling pathway	KEGG PATHWAY	ko03320	3	16	0.50499	0.999989	g6026|g6604|g7618	http://www.genome.jp/kegg-bin/show_pathway?ko03320/K00249%09red/K07513%09red/K00507%09red	Endocrine system	Organismal Systems
Lysine biosynthesis	KEGG PATHWAY	ko00300	2	10	0.5135	0.999989	g2864|g2555	http://www.genome.jp/kegg-bin/show_pathway?ko00300/K00928%09red/K00838%09red	Amino acid metabolism	Metabolism
Fc epsilon RI signaling pathway	KEGG PATHWAY	ko04664	2	10	0.5135	0.999989	g6873|g3	http://www.genome.jp/kegg-bin/show_pathway?ko04664/K04441%09red/K03099%09red	Immune system	Organismal Systems
Drug metabolism - other enzymes	KEGG PATHWAY	ko00983	2	10	0.5135	0.999989	g5807|g5006	http://www.genome.jp/kegg-bin/show_pathway?ko00983/K00106%09red/K01195%09red	Xenobiotics biodegradation and metabolism	Metabolism
Glutathione metabolism	KEGG PATHWAY	ko00480	5	29	0.521925	0.999989	g210|g6729|g1378|g580|g4686	http://www.genome.jp/kegg-bin/show_pathway?ko00480/K00681%09red/K01581%09red/K00033%09red/K01469%09red	Metabolism of other amino acids	Metabolism
Sphingolipid signaling pathway	KEGG PATHWAY	ko04071	4	23	0.530057	0.999989	g2765|g5756|g3|g1990	http://www.genome.jp/kegg-bin/show_pathway?ko04071/K00654%09red/K04441%09red/K12349%09red/K01115%09red	Signal transduction	Environmental Information Processing
Sulfur metabolism	KEGG PATHWAY	ko00920	3	17	0.541125	0.999989	g1083|g399|g5422	http://www.genome.jp/kegg-bin/show_pathway?ko00920/K00390%09red/K08738%09red/K01738%09red	Energy metabolism	Metabolism
Steroid hormone biosynthesis	KEGG PATHWAY	ko00140	1	5	0.593334	0.999989	g8184	http://www.genome.jp/kegg-bin/show_pathway?ko00140/K00545%09red	Lipid metabolism	Metabolism
Jak-STAT signaling pathway	KEGG PATHWAY	ko04630	1	5	0.593334	0.999989	g6873	http://www.genome.jp/kegg-bin/show_pathway?ko04630/K03099%09red	Signal transduction	Environmental Information Processing
Butirosin and neomycin biosynthesis	KEGG PATHWAY	ko00524	1	5	0.593334	0.999989	g6021	http://www.genome.jp/kegg-bin/show_pathway?ko00524/K00844%09red	_	_
Phosphatidylinositol signaling system	KEGG PATHWAY	ko04070	2	12	0.59999	0.999989	g1585|g2020	http://www.genome.jp/kegg-bin/show_pathway?ko04070/K00999%09red/K01092%09red	Signal transduction	Environmental Information Processing
Biosynthesis of amino acids	KEGG PATHWAY	ko01230	19	125	0.637378	0.999989	g2864|g2264|g1469|g800|g6493|g3622|g4879|g2555|g4547|g7490|g4545|g251|g252|g1416|g5923|g7218|g610|g5422|g3413	http://www.genome.jp/kegg-bin/show_pathway?ko01230/K01808%09red/K00286%09red/K14454%09red/K17989%09red/K01803%09red/K00052%09red/K01681%09red/K00600%09red/K00948%09red/K01624%09red/K00838%09red/K01626%09red/K00831%09red/K00928%09red/K00789%09red/K01647%09red/K01738%09red/K00549%09red	Global and overview maps	Metabolism
T cell receptor signaling pathway	KEGG PATHWAY	ko04660	2	13	0.638679	0.999989	g6873|g3	http://www.genome.jp/kegg-bin/show_pathway?ko04660/K04441%09red/K03099%09red	Immune system	Organismal Systems
p53 signaling pathway	KEGG PATHWAY	ko04115	1	6	0.649995	0.999989	g399	http://www.genome.jp/kegg-bin/show_pathway?ko04115/K08738%09red	Cell growth and death	Cellular Processes
Stilbenoid, diarylheptanoid and gingerol biosynthesis	KEGG PATHWAY	ko00945	1	6	0.649995	0.999989	g8226	http://www.genome.jp/kegg-bin/show_pathway?ko00945/K00517%09red	Biosynthesis of other secondary metabolites	Metabolism
C5-Branched dibasic acid metabolism	KEGG PATHWAY	ko00660	1	6	0.649995	0.999989	g4545	http://www.genome.jp/kegg-bin/show_pathway?ko00660/K00052%09red	Carbohydrate metabolism	Metabolism
Caprolactam degradation	KEGG PATHWAY	ko00930	1	6	0.649995	0.999989	g86	http://www.genome.jp/kegg-bin/show_pathway?ko00930/K00002%09red	Xenobiotics biodegradation and metabolism	Metabolism
Signaling pathways regulating pluripotency of stem cells	KEGG PATHWAY	ko04550	1	6	0.649995	0.999989	g3	http://www.genome.jp/kegg-bin/show_pathway?ko04550/K04441%09red	Cellular community - eukaryotes	Cellular Processes
MAPK signaling pathway	KEGG PATHWAY	ko04010	3	21	0.669058	0.999989	g740|g3|g6873	http://www.genome.jp/kegg-bin/show_pathway?ko04010/K04441%09red/K03099%09red/K04459%09red	Signal transduction	Environmental Information Processing
Various types of N-glycan biosynthesis	KEGG PATHWAY	ko00513	4	28	0.669299	0.999989	g2695|g5307|g1666|g6327	http://www.genome.jp/kegg-bin/show_pathway?ko00513/K05535%09red/K01230%09red	Glycan biosynthesis and metabolism	Metabolism
Lysine degradation	KEGG PATHWAY	ko00310	4	28	0.669299	0.999989	g801|g5386|g3008|g3035	http://www.genome.jp/kegg-bin/show_pathway?ko00310/K00128%09red/K00306%09red/K01843%09red	Amino acid metabolism	Metabolism
One carbon pool by folate	KEGG PATHWAY	ko00670	2	14	0.674361	0.999989	g3622|g285	http://www.genome.jp/kegg-bin/show_pathway?ko00670/K00600%09red/K00297%09red	Metabolism of cofactors and vitamins	Metabolism
MAPK signaling pathway - yeast	KEGG PATHWAY	ko04011	4	29	0.693456	0.999989	g3|g3237|g7249|g8352	http://www.genome.jp/kegg-bin/show_pathway?ko04011/K09448%09red/K04441%09red/K11213%09red/K11232%09red	Signal transduction	Environmental Information Processing
2-Oxocarboxylic acid metabolism	KEGG PATHWAY	ko01210	6	43	0.695149	0.999989	g2864|g1469|g2555|g4545|g7490|g7218	http://www.genome.jp/kegg-bin/show_pathway?ko01210/K14454%09red/K00052%09red/K01681%09red/K00928%09red/K01647%09red/K00838%09red	Global and overview maps	Metabolism
Phenylalanine, tyrosine and tryptophan biosynthesis	KEGG PATHWAY	ko00400	3	22	0.696619	0.999989	g7218|g3413|g2555	http://www.genome.jp/kegg-bin/show_pathway?ko00400/K01626%09red/K14454%09red/K00838%09red	Amino acid metabolism	Metabolism
Cytosolic DNA-sensing pathway	KEGG PATHWAY	ko04623	2	15	0.707123	0.999989	g1321|g2562	http://www.genome.jp/kegg-bin/show_pathway?ko04623/K03025%09red/K03027%09red	Immune system	Organismal Systems
Pyrimidine metabolism	KEGG PATHWAY	ko00240	9	65	0.719722	0.999989	g1760|g4318|g1346|g4094|g2562|g1321|g6942|g6839|g4066	http://www.genome.jp/kegg-bin/show_pathway?ko00240/K03005%09red/K03004%09red/K00761%09red/K03002%09red/K03025%09red/K03000%09red/K03027%09red/K02999%09red/K11541%09red	Nucleotide metabolism	Metabolism
Phospholipase D signaling pathway	KEGG PATHWAY	ko04072	2	16	0.737084	0.999989	g6873|g5756	http://www.genome.jp/kegg-bin/show_pathway?ko04072/K03099%09red/K01115%09red	Signal transduction	Environmental Information Processing
Chemokine signaling pathway	KEGG PATHWAY	ko04062	2	16	0.737084	0.999989	g6873|g5420	http://www.genome.jp/kegg-bin/show_pathway?ko04062/K05747%09red/K03099%09red	Immune system	Organismal Systems
Neurotrophin signaling pathway	KEGG PATHWAY	ko04722	2	16	0.737084	0.999989	g6873|g3	http://www.genome.jp/kegg-bin/show_pathway?ko04722/K04441%09red/K03099%09red	Nervous system	Organismal Systems
Apoptosis	KEGG PATHWAY	ko04210	1	8	0.740751	0.999989	g399	http://www.genome.jp/kegg-bin/show_pathway?ko04210/K08738%09red	Cell growth and death	Cellular Processes
ErbB signaling pathway	KEGG PATHWAY	ko04012	1	8	0.740751	0.999989	g6873	http://www.genome.jp/kegg-bin/show_pathway?ko04012/K03099%09red	Signal transduction	Environmental Information Processing
RIG-I-like receptor signaling pathway	KEGG PATHWAY	ko04622	1	8	0.740751	0.999989	g3	http://www.genome.jp/kegg-bin/show_pathway?ko04622/K04441%09red	Immune system	Organismal Systems
Selenocompound metabolism	KEGG PATHWAY	ko00450	1	8	0.740751	0.999989	g6493	http://www.genome.jp/kegg-bin/show_pathway?ko00450/K00549%09red	Metabolism of other amino acids	Metabolism
Melanogenesis	KEGG PATHWAY	ko04916	1	8	0.740751	0.999989	g8082	http://www.genome.jp/kegg-bin/show_pathway?ko04916/K00505%09red	Endocrine system	Organismal Systems
Vitamin B6 metabolism	KEGG PATHWAY	ko00750	1	8	0.740751	0.999989	g2264	http://www.genome.jp/kegg-bin/show_pathway?ko00750/K00831%09red	Metabolism of cofactors and vitamins	Metabolism
B cell receptor signaling pathway	KEGG PATHWAY	ko04662	1	8	0.740751	0.999989	g6873	http://www.genome.jp/kegg-bin/show_pathway?ko04662/K03099%09red	Immune system	Organismal Systems
Natural killer cell mediated cytotoxicity	KEGG PATHWAY	ko04650	1	9	0.776888	0.999989	g6873	http://www.genome.jp/kegg-bin/show_pathway?ko04650/K03099%09red	Immune system	Organismal Systems
Inflammatory mediator regulation of TRP channels	KEGG PATHWAY	ko04750	1	9	0.776888	0.999989	g3	http://www.genome.jp/kegg-bin/show_pathway?ko04750/K04441%09red	Sensory system	Organismal Systems
Hippo signaling pathway - fly	KEGG PATHWAY	ko04391	1	9	0.776888	0.999989	g3237	http://www.genome.jp/kegg-bin/show_pathway?ko04391/K09448%09red	Signal transduction	Environmental Information Processing
Platelet activation	KEGG PATHWAY	ko04611	1	9	0.776888	0.999989	g3	http://www.genome.jp/kegg-bin/show_pathway?ko04611/K04441%09red	Immune system	Organismal Systems
Citrate cycle (TCA cycle)	KEGG PATHWAY	ko00020	4	33	0.777321	0.999989	g7490|g4256|g917|g1469	http://www.genome.jp/kegg-bin/show_pathway?ko00020/K01900%09red/K01647%09red/K01610%09red/K01681%09red	Carbohydrate metabolism	Metabolism
HIF-1 signaling pathway	KEGG PATHWAY	ko04066	2	18	0.789196	0.999989	g6021|g4522	http://www.genome.jp/kegg-bin/show_pathway?ko04066/K00844%09red/K08008%09red	Signal transduction	Environmental Information Processing
Fatty acid elongation	KEGG PATHWAY	ko00062	1	10	0.807993	0.999989	g7217	http://www.genome.jp/kegg-bin/show_pathway?ko00062/K01074%09red	Lipid metabolism	Metabolism
Insulin signaling pathway	KEGG PATHWAY	ko04910	3	27	0.808662	0.999989	g2368|g6873|g6021	http://www.genome.jp/kegg-bin/show_pathway?ko04910/K03099%09red/K07192%09red/K00844%09red	Endocrine system	Organismal Systems
Two-component system	KEGG PATHWAY	ko02020	2	19	0.811671	0.999989	g8352|g399	http://www.genome.jp/kegg-bin/show_pathway?ko02020/K11232%09red/K08738%09red	Signal transduction	Environmental Information Processing
Valine, leucine and isoleucine biosynthesis	KEGG PATHWAY	ko00290	2	19	0.811671	0.999989	g1416|g4545	http://www.genome.jp/kegg-bin/show_pathway?ko00290/K17989%09red/K00052%09red	Amino acid metabolism	Metabolism
Porphyrin and chlorophyll metabolism	KEGG PATHWAY	ko00860	2	19	0.811671	0.999989	g5006|g6516	http://www.genome.jp/kegg-bin/show_pathway?ko00860/K01764%09red/K01195%09red	Metabolism of cofactors and vitamins	Metabolism
Dopaminergic synapse	KEGG PATHWAY	ko04728	2	19	0.811671	0.999989	g3|g8184	http://www.genome.jp/kegg-bin/show_pathway?ko04728/K04441%09red/K00545%09red	Nervous system	Organismal Systems
Meiosis - yeast	KEGG PATHWAY	ko04113	7	58	0.819105	0.999989	g396|g1359|g555|g6348|g6901|g7899|g5914	http://www.genome.jp/kegg-bin/show_pathway?ko04113/K10872%09red/K12769%09red/K08139%09red/K02603%09red/K12765%09red/K02604%09red	Cell growth and death	Cellular Processes
PI3K-Akt signaling pathway	KEGG PATHWAY	ko04151	3	28	0.826318	0.999989	g8253|g6873|g8319	http://www.genome.jp/kegg-bin/show_pathway?ko04151/K09420%09red/K03099%09red	Signal transduction	Environmental Information Processing
Adherens junction	KEGG PATHWAY	ko04520	1	11	0.834765	0.999989	g5420	http://www.genome.jp/kegg-bin/show_pathway?ko04520/K05747%09red	Cellular community - eukaryotes	Cellular Processes
Estrogen signaling pathway	KEGG PATHWAY	ko04915	1	11	0.834765	0.999989	g6873	http://www.genome.jp/kegg-bin/show_pathway?ko04915/K03099%09red	Endocrine system	Organismal Systems
Gap junction	KEGG PATHWAY	ko04540	1	11	0.834765	0.999989	g6873	http://www.genome.jp/kegg-bin/show_pathway?ko04540/K03099%09red	Cellular community - eukaryotes	Cellular Processes
Rap1 signaling pathway	KEGG PATHWAY	ko04015	1	11	0.834765	0.999989	g3	http://www.genome.jp/kegg-bin/show_pathway?ko04015/K04441%09red	Signal transduction	Environmental Information Processing
VEGF signaling pathway	KEGG PATHWAY	ko04370	1	11	0.834765	0.999989	g3	http://www.genome.jp/kegg-bin/show_pathway?ko04370/K04441%09red	Signal transduction	Environmental Information Processing
cAMP signaling pathway	KEGG PATHWAY	ko04024	1	12	0.857807	0.999989	g5756	http://www.genome.jp/kegg-bin/show_pathway?ko04024/K01115%09red	Signal transduction	Environmental Information Processing
Glutamatergic synapse	KEGG PATHWAY	ko04724	1	12	0.857807	0.999989	g5756	http://www.genome.jp/kegg-bin/show_pathway?ko04724/K01115%09red	Nervous system	Organismal Systems
Adrenergic signaling in cardiomyocytes	KEGG PATHWAY	ko04261	1	12	0.857807	0.999989	g3	http://www.genome.jp/kegg-bin/show_pathway?ko04261/K04441%09red	Circulatory system	Organismal Systems
Focal adhesion	KEGG PATHWAY	ko04510	1	12	0.857807	0.999989	g6873	http://www.genome.jp/kegg-bin/show_pathway?ko04510/K03099%09red	Cellular community - eukaryotes	Cellular Processes
Arginine biosynthesis	KEGG PATHWAY	ko00220	2	22	0.866769	0.999989	g7218|g4799	http://www.genome.jp/kegg-bin/show_pathway?ko00220/K14454%09red/K01427%09red	Amino acid metabolism	Metabolism
Hippo signaling pathway	KEGG PATHWAY	ko04390	1	13	0.877639	0.999989	g3237	http://www.genome.jp/kegg-bin/show_pathway?ko04390/K09448%09red	Signal transduction	Environmental Information Processing
Ras signaling pathway	KEGG PATHWAY	ko04014	2	23	0.881564	0.999989	g6873|g5756	http://www.genome.jp/kegg-bin/show_pathway?ko04014/K03099%09red/K01115%09red	Signal transduction	Environmental Information Processing
Regulation of mitophagy - yeast	KEGG PATHWAY	ko04139	3	32	0.883621	0.999989	g7858|g2903|g3	http://www.genome.jp/kegg-bin/show_pathway?ko04139/K08341%09red/K04441%09red/K02332%09red	_	_
Fc gamma R-mediated phagocytosis	KEGG PATHWAY	ko04666	2	24	0.894828	0.999989	g5756|g5420	http://www.genome.jp/kegg-bin/show_pathway?ko04666/K05747%09red/K01115%09red	Immune system	Organismal Systems
Folate biosynthesis	KEGG PATHWAY	ko00790	1	15	0.909398	0.999989	g7389	http://www.genome.jp/kegg-bin/show_pathway?ko00790/K01495%09red	Metabolism of cofactors and vitamins	Metabolism
Regulation of actin cytoskeleton	KEGG PATHWAY	ko04810	2	27	0.926772	0.999989	g6873|g5420	http://www.genome.jp/kegg-bin/show_pathway?ko04810/K05747%09red/K03099%09red	Cell motility	Cellular Processes
Thyroid hormone signaling pathway	KEGG PATHWAY	ko04919	1	17	0.93292	0.999989	g814	http://www.genome.jp/kegg-bin/show_pathway?ko04919/K01114%09red	Endocrine system	Organismal Systems
Aminoacyl-tRNA biosynthesis	KEGG PATHWAY	ko00970	3	38	0.93826	0.999989	g5963|g2301|g1297	http://www.genome.jp/kegg-bin/show_pathway?ko00970/K01870%09red/K01867%09red/K02433%09red	Translation	Genetic Information Processing
Glycosylphosphatidylinositol(GPI)-anchor biosynthesis	KEGG PATHWAY	ko00563	1	18	0.942282	0.999989	g1026	http://www.genome.jp/kegg-bin/show_pathway?ko00563/K03859%09red	_	_
N-Glycan biosynthesis	KEGG PATHWAY	ko00510	2	29	0.942718	0.999989	g5307|g1666	http://www.genome.jp/kegg-bin/show_pathway?ko00510/K01230%09red	Glycan biosynthesis and metabolism	Metabolism
Pantothenate and CoA biosynthesis	KEGG PATHWAY	ko00770	1	19	0.95034	0.999989	g662	http://www.genome.jp/kegg-bin/show_pathway?ko00770/K01918%09red	Metabolism of cofactors and vitamins	Metabolism
Progesterone-mediated oocyte maturation	KEGG PATHWAY	ko04914	1	20	0.957273	0.999989	g3	http://www.genome.jp/kegg-bin/show_pathway?ko04914/K04441%09red	Endocrine system	Organismal Systems
AMPK signaling pathway	KEGG PATHWAY	ko04152	1	23	0.972791	0.999989	g7618	http://www.genome.jp/kegg-bin/show_pathway?ko04152/K00507%09red	Signal transduction	Environmental Information Processing
Fanconi anemia pathway	KEGG PATHWAY	ko03460	1	23	0.972791	0.999989	g758	http://www.genome.jp/kegg-bin/show_pathway?ko03460/K15361%09red	Replication and repair	Genetic Information Processing
RNA degradation	KEGG PATHWAY	ko03018	3	49	0.982152	0.999989	g4554|g1113|g6030	http://www.genome.jp/kegg-bin/show_pathway?ko03018/K03514%09red/K08300%09red/K12592%09red	Folding, sorting and degradation	Genetic Information Processing
Basal transcription factors	KEGG PATHWAY	ko03022	1	31	0.991841	0.999989	g7757	http://www.genome.jp/kegg-bin/show_pathway?ko03022/K03135%09red	Transcription	Genetic Information Processing
Phagosome	KEGG PATHWAY	ko04145	1	36	0.99616	0.999989	g4522	http://www.genome.jp/kegg-bin/show_pathway?ko04145/K08008%09red	Transport and catabolism	Cellular Processes
Cell cycle	KEGG PATHWAY	ko04110	2	51	0.99669	0.999989	g7899|g5914	http://www.genome.jp/kegg-bin/show_pathway?ko04110/K02603%09red/K02604%09red	Cell growth and death	Cellular Processes
Ubiquitin mediated proteolysis	KEGG PATHWAY	ko04120	2	54	0.99779	0.999989	g8061|g253	http://www.genome.jp/kegg-bin/show_pathway?ko04120/K10582%09red/K09561%09red	Folding, sorting and degradation	Genetic Information Processing
Protein processing in endoplasmic reticulum	KEGG PATHWAY	ko04141	3	72	0.998925	0.999989	g5307|g1666|g253	http://www.genome.jp/kegg-bin/show_pathway?ko04141/K09561%09red/K01230%09red	Folding, sorting and degradation	Genetic Information Processing
Oxidative phosphorylation	KEGG PATHWAY	ko00190	3	77	0.999432	0.999989	g988|g7744|g986	http://www.genome.jp/kegg-bin/show_pathway?ko00190/K02260%09red/K01535%09red	Energy metabolism	Metabolism
Endocytosis	KEGG PATHWAY	ko04144	2	71	0.999785	0.999989	g5756|g5420	http://www.genome.jp/kegg-bin/show_pathway?ko04144/K05747%09red/K01115%09red	Transport and catabolism	Cellular Processes
Cell cycle - yeast	KEGG PATHWAY	ko04111	2	75	0.999877	0.999989	g7899|g5914	http://www.genome.jp/kegg-bin/show_pathway?ko04111/K02603%09red/K02604%09red	Cell growth and death	Cellular Processes
Ribosome	KEGG PATHWAY	ko03010	3	98	0.999964	0.999989	g6840|g5720|g5186	http://www.genome.jp/kegg-bin/show_pathway?ko03010/K02928%09red/K02921%09red/K02963%09red	Translation	Genetic Information Processing
